# Supplementary material for: Bias Light Driving Enables Bandwidth Tunable Photodetectors and Its Applications
Source: Research Square preprint supplement (doi:10.21203/rs.3.rs-5229846/v1), 2024-11-27
Supplement: Supplementary file 1 [file 3e1c55c2fc88f6d826188ad9.docx]

Supplementary Materials for

**Bias Light Driving Enables Bandwidth Tunable Photodetectors and Its Applications**

Yu Zhang *et al.*

Corresponding author: Guangcai Yuan, Suling Zhao.

Email: yuanguangcai@boe.com.cn; slzhao@bjtu.edu.cn

**Table of Content****s**

**Supplementary Texts**

Supplementary Text 1 3

Supplementary Text 2 4

Supplementary Text 3 4

**Supplementary Figures**

Supplementary Figure 1 6

Supplementary Figure 2 7

Supplementary Figure 3 8

Supplementary Figure 4 9

Supplementary Figure 5 10

Supplementary Figure 6 11

Supplementary Figure 7 12

Supplementary Figure 8 13

Supplementary Figure 9 14

Supplementary Figure 10 15

Supplementary Figure 11 16

Supplementary Figure 12 17

Supplementary Figure 13 18

Supplementary Figure 14 19

Supplementary Figure 15 20

Supplementary Figure 16 21

Supplementary Figure 17. 22

Supplementary Figure 18 23

Supplementary Figure 19 24

Supplementary Figure 20 25

Supplementary Figure 21 26

Supplementary Figure 22 27

Supplementary Figure 23 28

Supplementary Figure 24 29

Supplementary Figure 25 30

Supplementary Figure 26 31

Supplementary Figure 27 32

Supplementary Figure 28 33

Supplementary Figure 29 34

Supplementary Figure 30 35

Supplementary Figure 31. 36

**Supplementary Tables**

Supplementary Table 1. 37

Supplementary Table 2. 37

Supplementary Table 3. 37

Supplementary Table 4 38

Supplementary Table 5. 38

Supplementary Table 6. 39

**Supplementary Videos**

Supplementary Video 1 40

Supplementary Video 2 40

**Reference**

Supplementary Text 1

**The fundamentals and testing procedure of** **spectral responsivity for photodetectors.**

We used the spectral responsivity calibration system (Zolix DSR600) to measure the spectral characteristics of photodetectors. The system consists of a radiation source, optical chopper, monochromator, preamplifier, lock-in amplifier, computer, and a reference detector. Figure 1b demonstrates the schematics of the test system. We also provide another testing method for ease of understanding and comparison. The discrepancy between the two testing systems is mainly reflected in the optical and signal acquisition systems and will be discussed in detail below.

The testing steps are as follows：

The reference detector, whose spectral responsivity Rir(λ) is already known, was tested to obtain a Vr(λ) for spectrometric calibration.

Then the tested detector was measured and a Vs(λ)was obtained. The current responsivity of tested detector Ri(λ) can be calculated by1:

(S1)

During this process, we proposed emitting an extra laser LED outside the optical path to irradiate the tested detector. The tested detector simultaneously receives monochromatic alternating radiation from the radiation source after being modulated by a chopper and a monochromator, as well as constant bias radiation generated by the LED, generating photocurrent involving AC components(Isa) and DC components (Isd). The lock-in amplifier compares the test signal frequency with the reference signal(acquired from the chopper) and only collects the AC components at the same frequency as the reference signal. That means data collection only involves AC signals while filtering out the DC signals generated by LEDs. Under the circumstances, the Ri(λ) calculation question changed to

(S2)

where Ira is the AC component measured with a reference detector.

For the second test system, high-precision digital source meters collect the current signal directly. In this testing mode, the light emitted by the radiation source is no longer modulated by the chopper. The DC signals Isd and Ild generated by the radiation source and LED, respectively, are collected simultaneously by a digital source meter; consequently, the measured joint current Ii= Isd+ Ild+ Idark. Therefore, it is necessary to turn on the LED light source when collecting dark noise from the detector to distinguish the current contribution of LED light.

(S3)

where Ird (λ) is the radiation source generated photocurrent measured with reference detector.

The schematics of the two different test systems and the diagrams for the equivalent circuits are shown in Supplementary Figure 31.

Supplementary Text 2

**Characterization parameters of photodetector**

Responsivity (R): Defined as the ratio of the photocurrent generated by a specific wavelength of light to the incident light power, unit as A/W or mA/W, is written as follows:

(S4)

External quantum efficiency (EQE): Defined as the ratio of the number of collected charges to the number of incident photons. Meanwhile, the EQE can be calculated from R by

(S5)

where h represents Planck constant, c is the light speed, q is the elementary charge, λ is the wavelength of incident light. Both the EQE and R can reflect the device's photovoltaic conversion efficiency.

Spectral rejection ratio (SRR): Defined as the ratio of the responsivity at the target wavelength to the one at the untargeted reference wavelength, which can reflect the ability of devices to detect narrowband signals and can be calculated by

(S6)

Response time (Tr/ Tf): Defined as the rise time (Tr) from 10% to 90% of the maximum photocurrent and the fall time (Tf) from 90% to 10% in response to light pulse input. It can be applied to describe the response speed of PD to the incident light signal and is closely related to charge transfer and collection, as well as the charge recombination process.

Specific detectivity, D*(λ): Reflected the sensitivity of weak light detection, can be calculated by

(S7)

where Jd is the dark current density. The higher the D*, the better the ability of the device to detect weak light.

Linear dynamic range (LDR): describes the range of incident light power within which the photocurrent is linearly proportional to the light energy. Normally, the R (λ) of the PDs remains constant within the LDR. The LDR can be calculated by

(S8)

Supplementary Text 3

**Time domain and frequency domain testing techniques**

In this work, we have studied the photoelectric conversion process under dual light incidence, in which the probe light is frequency-modulated and accompanied by a continuous bias light. The photogenerated photocurrent consists of AC (probe light) and DC (bias light) simultaneously, and conventional current acquisition methods, such as using a source meter, are infeasible. Meanwhile, the typical characterization, such as J-V, is challenging. Therefore, it is necessary to separate the probe and bias light signals specifically using test and data processing methods.

The lock-in amplifier is utilized in spectral responsivity testing to extract the AC signal generated by probe signals (Supplementary Text 1). We also perform the modulation of photocurrent under biased light conditions with this method (Fig. 4b).

Besides, multiple analytical characterization techniques were used in both time and frequency domains to conduct an in-depth analysis of the variation of photocurrent with bias light.

Transient response is a typical time-domain testing method commonly used to characterize the optical response speed of devices to signal light. During the testing process, the light response signal at the moment of illumination can be captured by an oscilloscope, which helps to distinguish the AC and DC signals (see Fig. 1f). Meanwhile, using the mathematical function of an oscilloscope to Fourier transform signal data can easily extract light response signals at specific frequencies (supplementary video 1).

Small perturbation testing techniques, such as IMVS and IMPS, were frequency domain techniques that can be used to analyze and monitor the carrier transfer and recombination process. During the testing process, a constant light with an intensity of I0 is irradiated onto the device under test, and at the same time, a sine modulated light with an intensity of I0/10 is superimposed, then modulating the sine wave frequency yields a series of photocurrent or photovoltage data. In the IMPS test, we also attempted to fix the modulation light intensity and adjust the steady-state light intensity (Fig.3 d-e, Supplementary Table 4), which was suitable for our testing scenario and yielded the same results. IMPS was tested at short-circuit conditions, while IMVS was off-state. The time constant reflecting the transport and recombination of carriers can be calculated by

(S9)

where τtr and τrec is the time constant. f is the frequency of the maxima of the negative imaginary part in IMPS or IMVS.


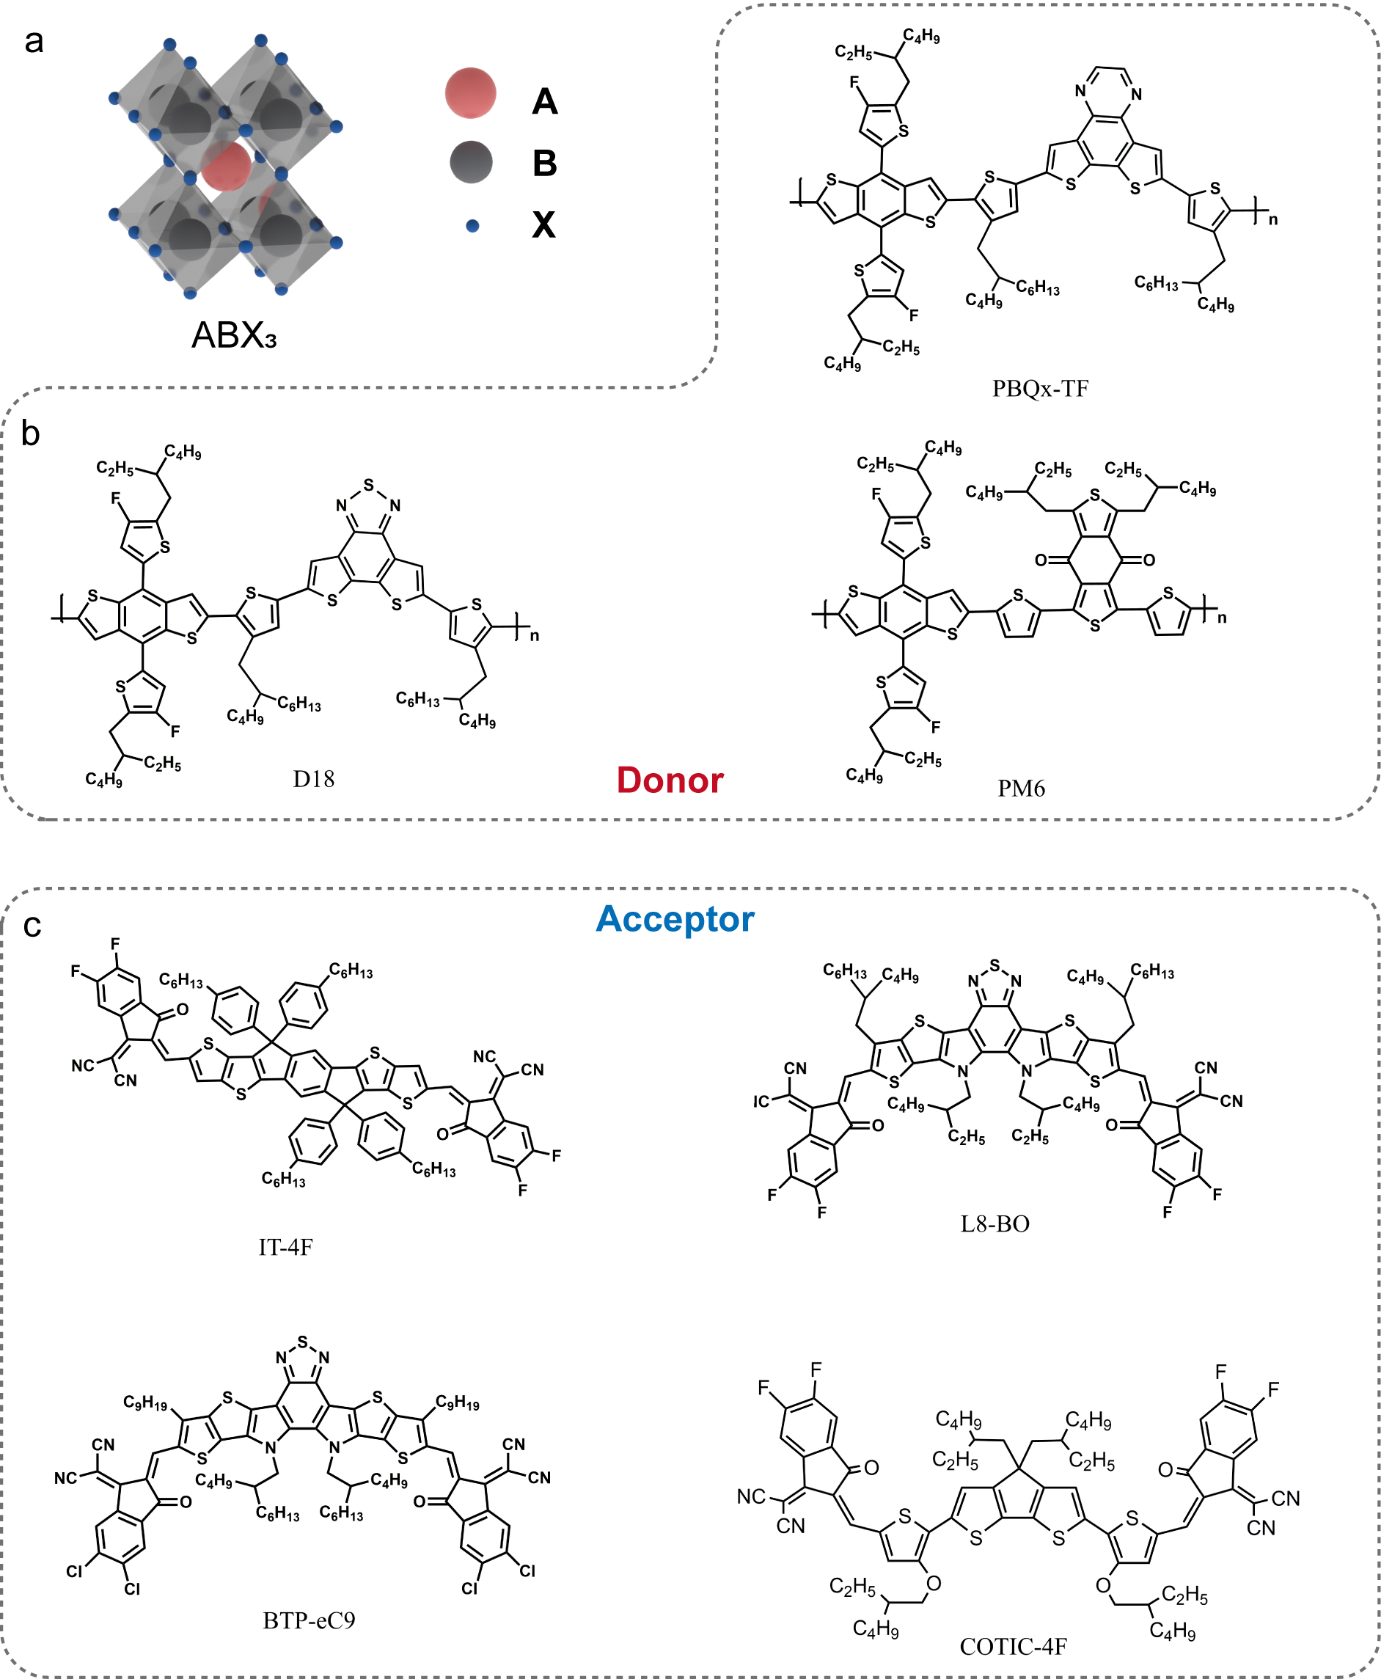


Supplementary Figure 1. The structures of the photoactive materials used in this work. a. Crystal structures of typical perovskite materials (MAPbI3, A= MA+, B= Pb2+, C= I-). The chemical structures of b. polymer donor PBQx-TF, D18, PM6 and c. non-fullerene acceptors IT-4F, L8-BO, BTP-eC9, COTIC-4F.


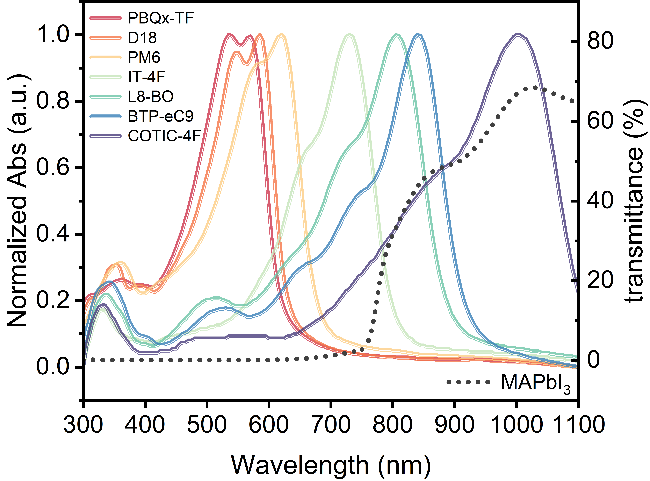


Supplementary Figure 2. Absorption spectra and transmittance spectra for photoactive materials. The Absorption curves of organic materials, such as donor materials PBQx-TF, D18, PM6 and norfullerene acceptors IT-4F, L8-BO, BTP-eC9 and COTIC-4F. The transmittance curve of MAPbI3 perovskite film with a thickness of 1100nm was also introduced.

**
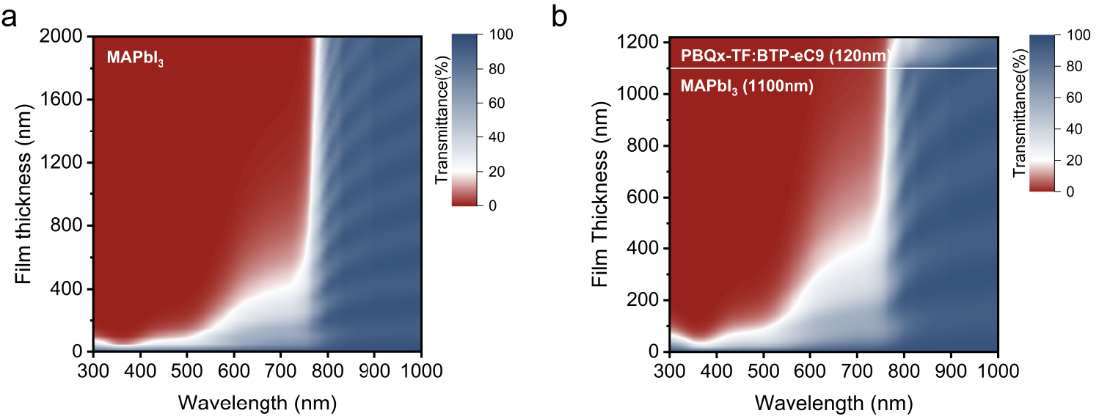
**

Supplementary Figure 3. Simulated transmittance as the function of film thickness. a. MAPbI3 film with a thickness of 2000nm and b. MAPbI3/PBQx-TF: BTP-eC9 integrated film. The transmittance was simulated with setfol. The step of the thickness was set as 10nm.


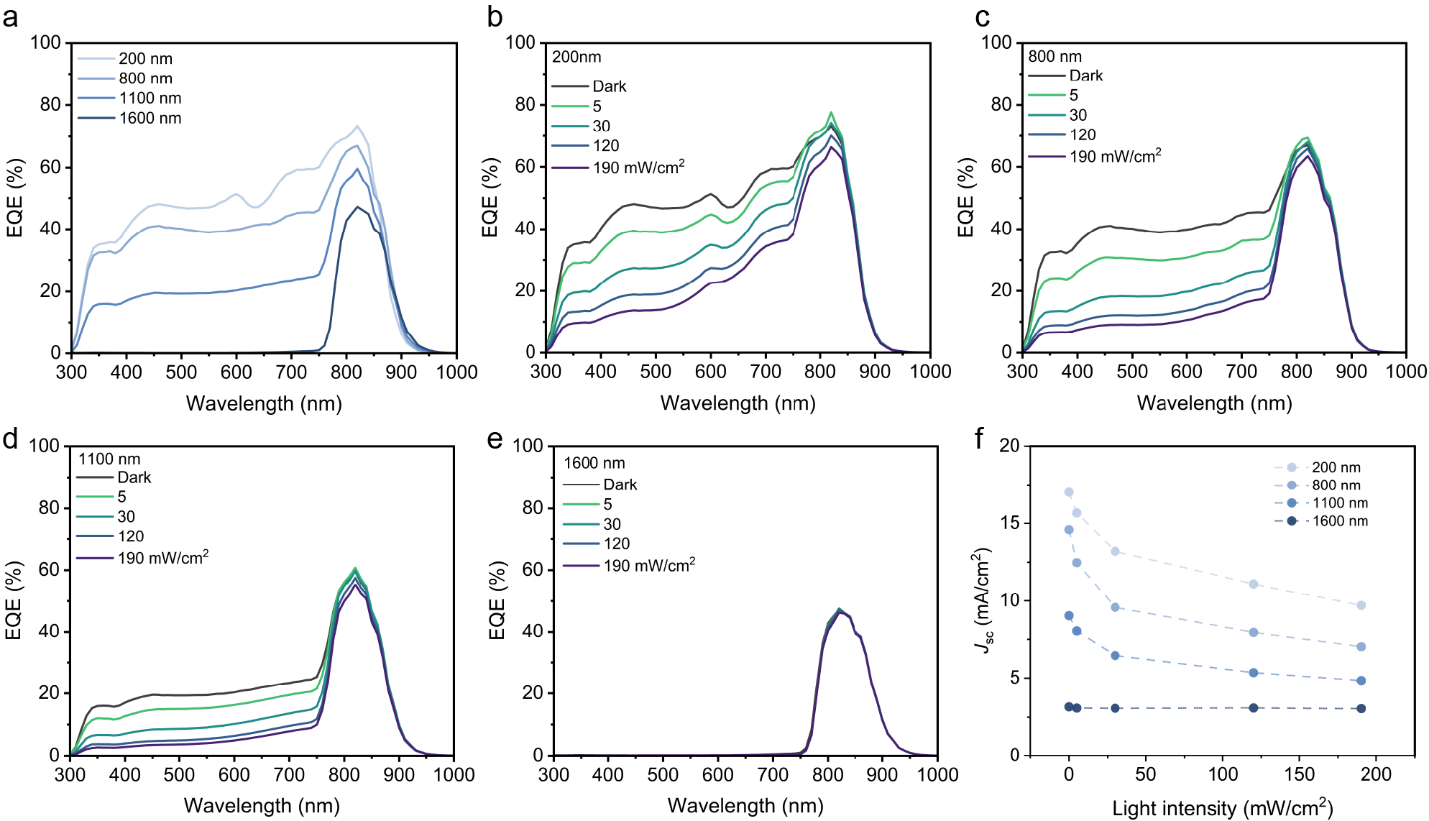


Supplementary Figure 4. EQE suppressed as the function of perovskite film thickness and bias light intensity. a. EQE curves for PO-PDs with different thicknesses of perovskite layer. EQE curves as a function of bias light intensity for PO-PDs with different thicknesses of perovskite layer, b-e. 200, 800, 1100, and 1600nm, respectively. f. integral current obtains from the EQE test as a function of bias light intensity at 535nm bias light illumination.


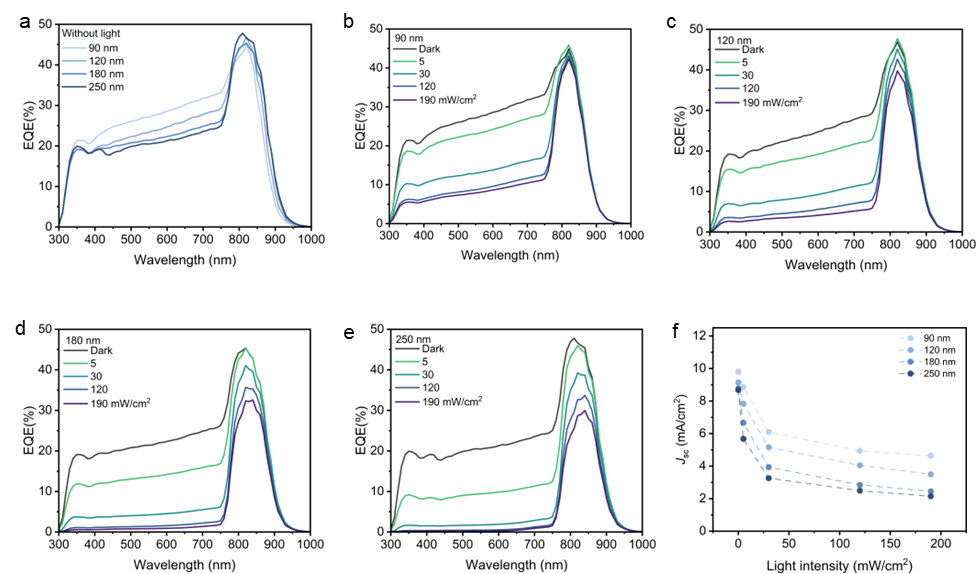


Supplementary Figure 5. EQE as the function of organic film thickness and bias light intensity. a. EQE for PO-PDs with different thicknesses of organic blend layer. EQE curves for PO-PDs with different thicknesses of perovskite layer at b-e. 90, 120, 180, and 250nm, respectively, as a function of bias light intensity. f. integral current as a function of bias light intensity at 535nm bias light illumination.


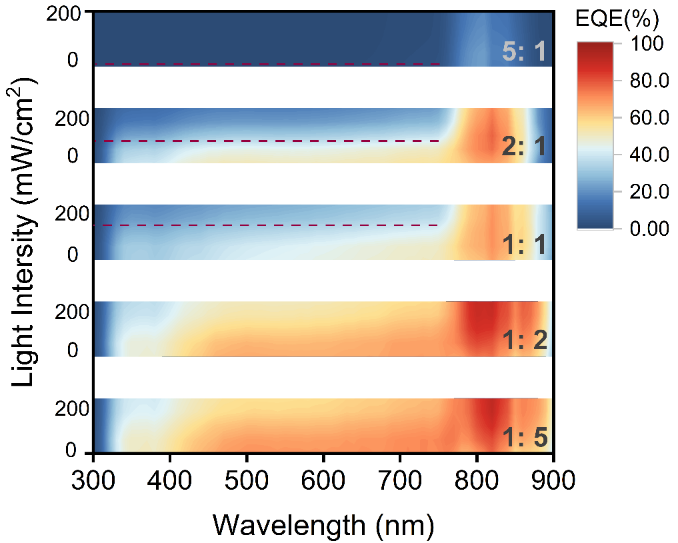


Supplementary Figure 6. EQE for PO-PDs at different donor: acceptor ratio. The vertical axis represents the intensity of bias light. A 530nm bias light was applied and changed in intensity during the EQE test.

**
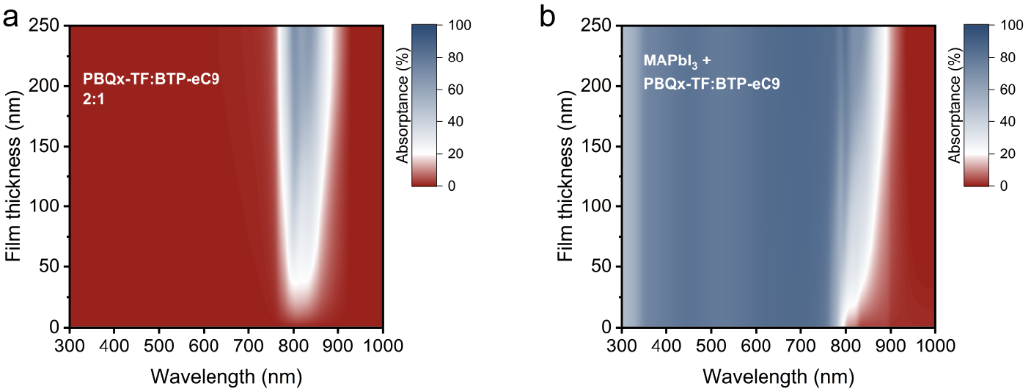
**

Supplementary Figure 7. Simulated absorptance of organic layer. a. organic blend film with a D: A ratio at 2:1, and b. perovskite/organic integrate film, the perovskite with a thickness of 1100nm was not shown in the figure; the zero point of the y-axis is the interface between the perovskite and organic layer.


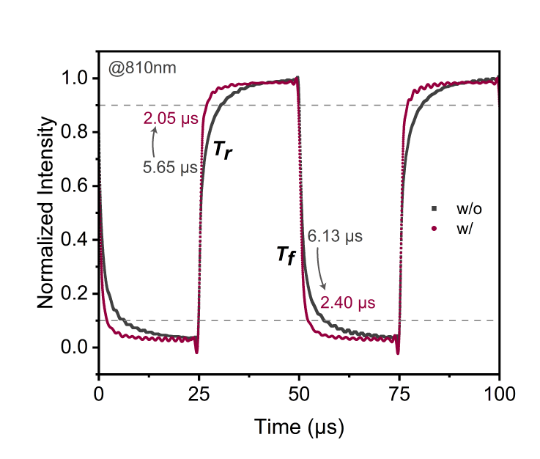


Supplementary Figure 8. Response time for PO-NPDs before and after bias light illumination. An 810nm modulated light with a frequency of 20kHz was set as the probe light signal, and the 395nm continuous light at 100mW/cm2 performs as the bias light.


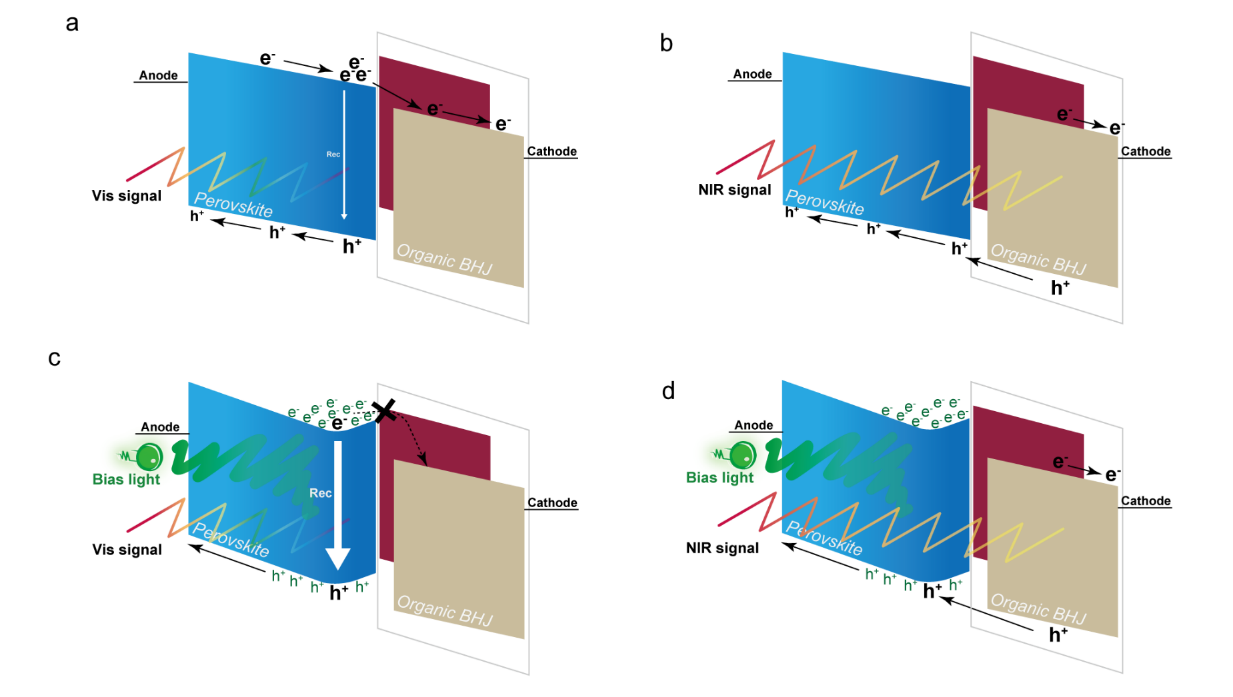


Supplementary Figure 9. Schematic of photogenerated carrier distribution and behaviors for different light illumination conditions. The behaviors of carriers in a PO-NPD at conditions of probe light only (a-b) and applying probe light and bias light simultaneously(c-d). Bias light off: (a) the thick perovskite layer harvests the visible signal and generates carriers within the perovskite absorber, then transferred and collected by the electrodes. Specifically, the organic layer with a large donor radio will hinder the electrons partly, leaving the rest of the electrons to pass through and resulting in an obvious photocurrent. The NIR signal (b) will transmit the perovskite layer and be captured by the organic blender. At this stage, the carriers transfer freely and efferently, causing an excellent photoresponse in the NIR range. Therefore, PO-PD exhibits light response to both visible and near-infrared signals and has poor spectral selectivity. Bias light on: when a bias light (within the absorption range of the perovskite absorber) is applied, quantities of bias light-generated electrons will be enriched in the perovskite and accumulated at the interface, causing significantly enhanced recombination (c). As a result, the response of the visible signal is gradually suppressed along with the increase of bias light intensity. The NIR signal-generated holes will sustain transmission without withstanding the suppression of bias light, transferring even faster under the newly built-in electric field of bias light(d). Eventually, under bias light conditions, selective detection of near-infrared signals has been achieved.

Supplementary Figure 10. The electrochemical impedance spectroscopy curves for PO-NPDs. The EIS was tested at different intensities of 530nm light irradiation(a-f), and g. the equivalent circuit for parameters fitting.

Supplementary Figure 11. Intensity-modulated photovoltage spectroscopy. The IMVS was measured at the open circuit with 530nm DC light and AC-modulated light illumination simultaneously. The light intensity for DC and AC was set at 10:1, and the inset captions represent the DC light intensity.

Supplementary Figure 12. The Femtosecond transient absorption spectral of MAPbI3 film. a-c.the TA spectral at selected time delays measured without and with a 395nm bias light illumination. d. TA decay kinetics and e. the fitting curves.

Supplementary Figure 13. The fitting curves for TA spectral of MAPbI3 film. At a. logarithmic and b. linear axis for the x-axis representing time delay.


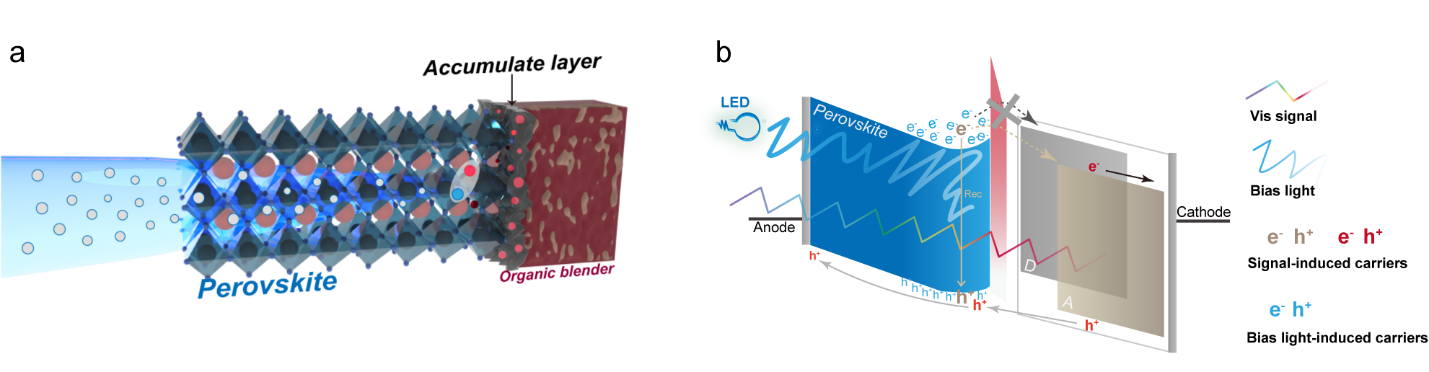


Supplementary Figure 14. a. Schematic of applying a charge accumulate layer at the interface between perovskite and organic blender. b. energy level diagram and behaviors of carriers in the quasi-tandem narrowband PDs. The interface layer between the perovskite and organic BHJ acts as a blocking layer for the electrons generated in perovskite, causing a serious accumulation of electrons and promoting photoinduced recombination.

**
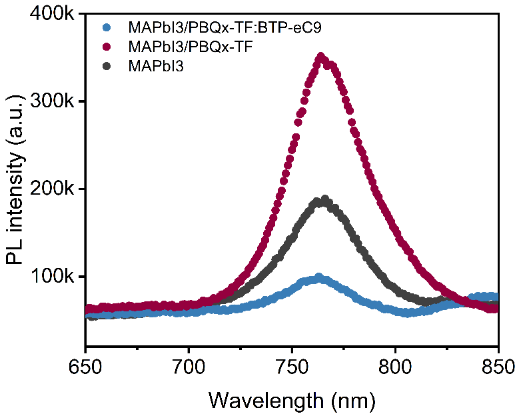
**

Supplementary Figure 15. Steady-state PL. the PL of MAPbI3 films and addition with extra organic layer.

Supplementary Figure 16. TA spectral. The TA spectral measured for a. MAPbI3 film, b. MAPbI3/ PBQx-TF: BTP-eC9 integrated film and c. MAPbI3/ PBQx-TF integrated film. d. The normalized TA kinetics at the GSB peaks of perovskite/organic integrated film.


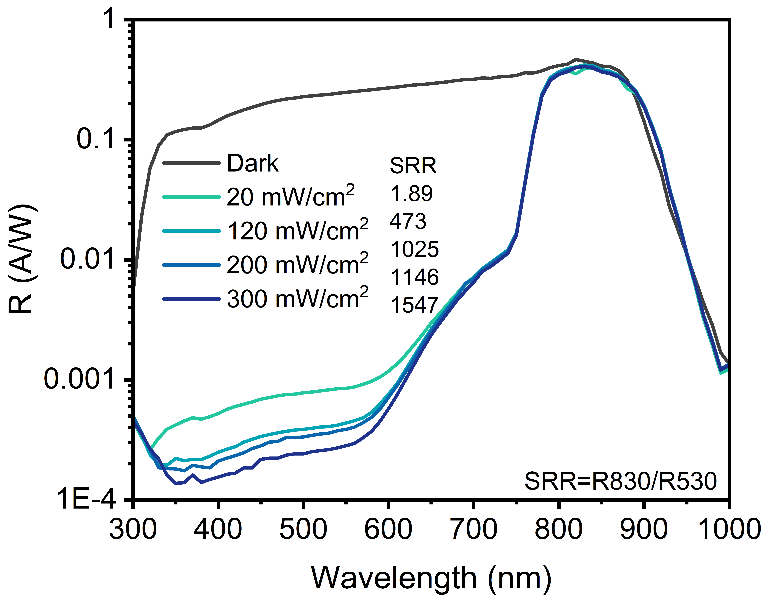


Supplementary Figure 17. Responsivity of PO-NPDs as the function of bias light intensity. A 395nm bias light was introduced, and the corresponding spectral suppression ratio under different irradiation was calculated by SRR= R830/R530, where Rλ is the responsivity at a wavelength of λ.

**
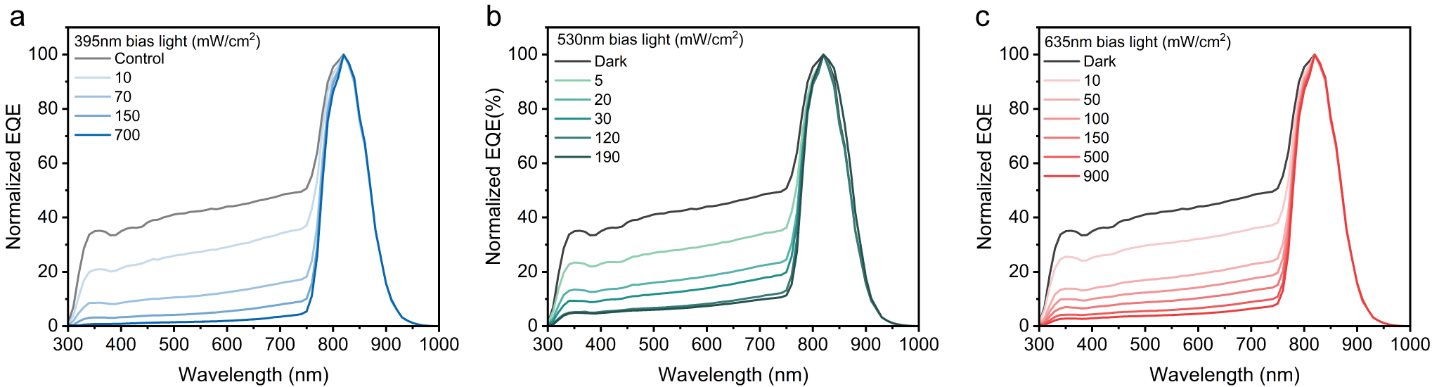
**

Supplementary Figure 18. EQE curves at monochromatic light with different wavelengths. The EQE curves for PO-NPDs function according to the intensity of bias light, a-c. At 395nm, 530nm, and 635nm of monochromatic bias light irradiation, respectively.


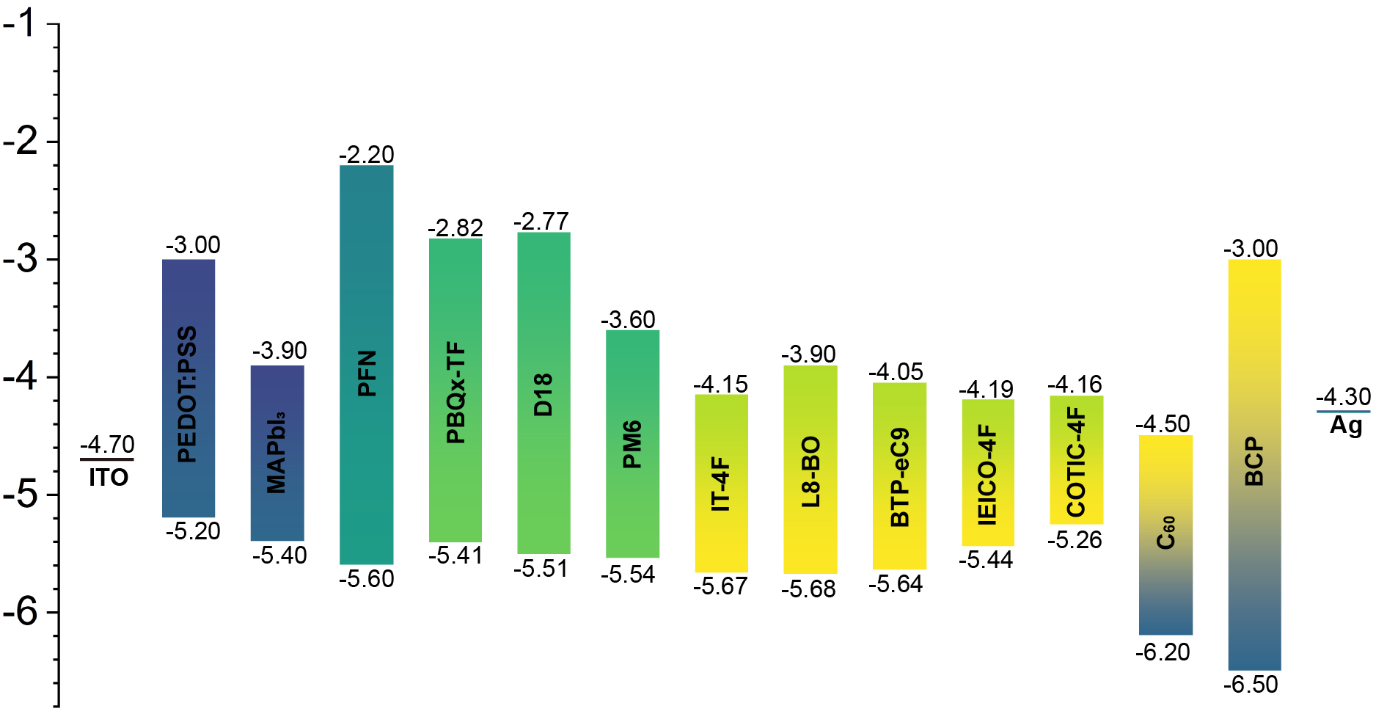


Supplementary Figure 19. Schematic illustration of the energy level diagrams for all materials used in PO-PDs.

**
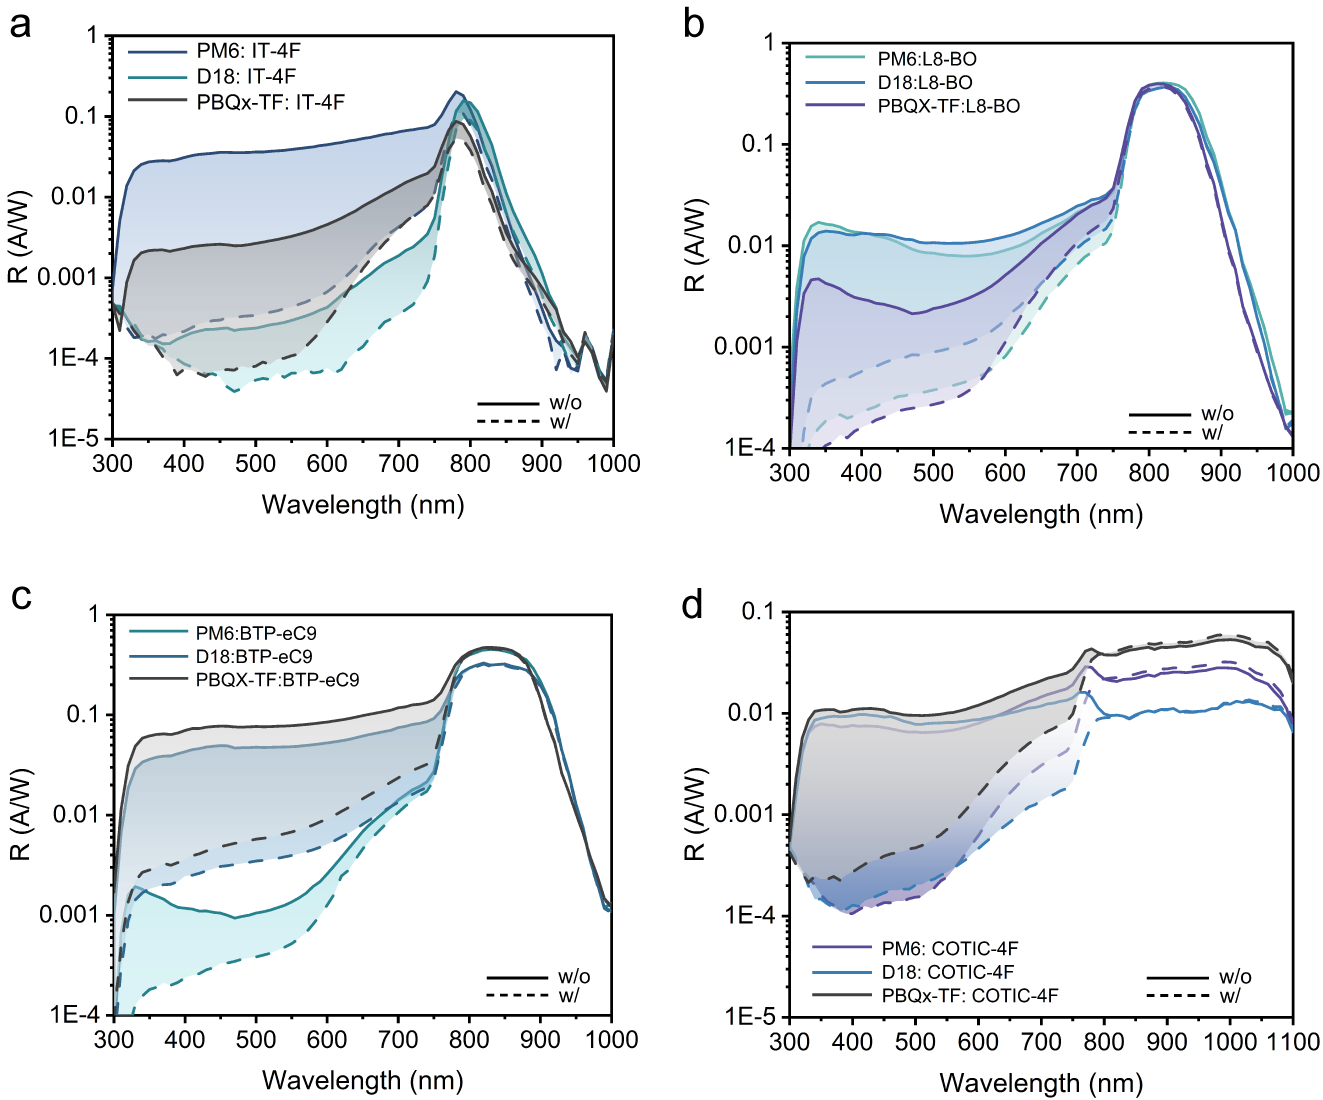
**

Supplementary Figure 20. Responsivity of PO-PDs with different organic blend. a-d the perovskite/organic integrated devices with various donor and acceptor materials were measured with or without bias light illumination. The solid line represents the condition without bias light irradiation, while the dashed line represents the condition of bias light irradiation. A 530nm bias light was applied at 100mW/cm2.

**
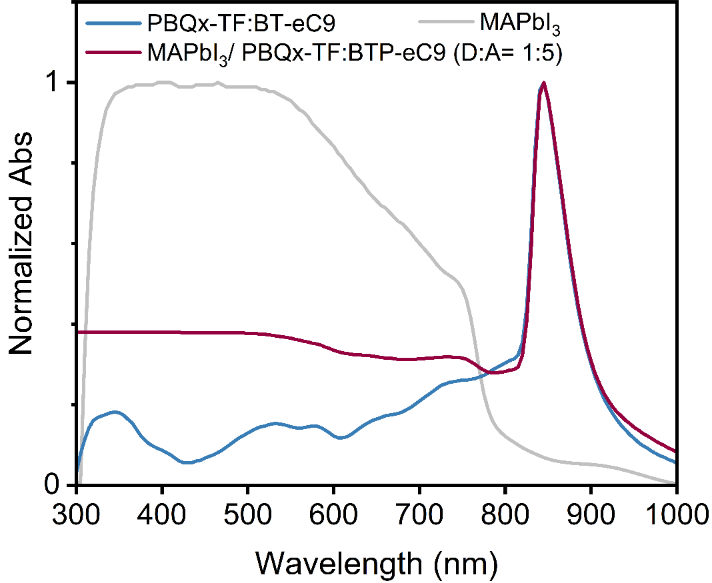
**

Supplementary Figure 21. The Absorption curves of perovskite and organic absorbers.

Supplementary Figure 22. Simulation absorption for the perovskite/ organic integrated film. Films absorption for a. perovskite film, b. organic film with a D: A ratio at 1:5, thickness at normal 120nm, and c. perovskite/ organic integrated film as the function of thickness for perovskite. The y-axis represents the thickness of the perovskite layer. d. The absorption curves for perovskite/ organic integrated films, the organic film was set as 120nm, and the thickness for perovskite was adjusted.


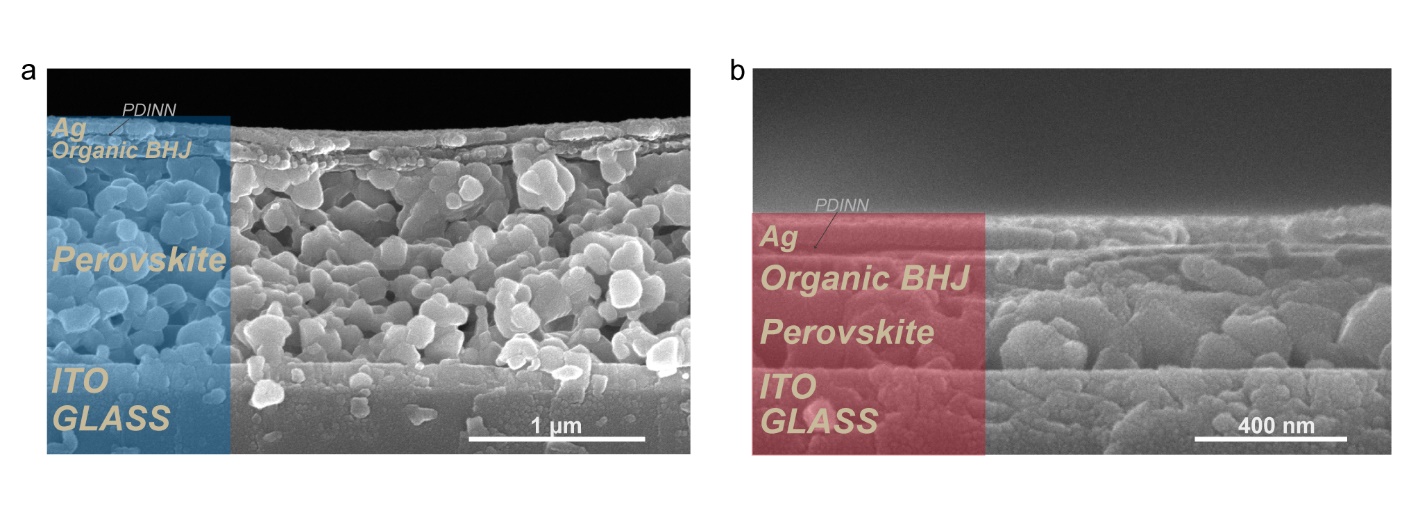


Supplementary Figure 23. Cross-section SEM for perovskite/organic integrated photodetector. a. the SEM of PO-NPD and b. PO-BPD.

Supplementary Figure 24. The intensity-modulated photocurrent spectroscopy measured at 470nm light illumination. The 470nm light consisted of DC light, and AC modulated light at an intensity ratio of 10:1. The light is incident from ITO; in this case, it directly reflects the internal property changes of the perovskite layer with radiation intensity changes.

Supplementary Figure 25. Transient photocurrent response of PO-BPDs. The transient response measured at 810nm with a modulation frequency of 10kHz, and a. the bias light was applied with 470nm LED at different intensities. b-c. the bias light was applied with 810nm LED at different intensities for normalized response intensity and actual value, respectively. d. the response time of PO-BPD measured at 810nm with a modulation frequency of 100kHz and a bias light irradiation (@470nm, 500W/m2).

**
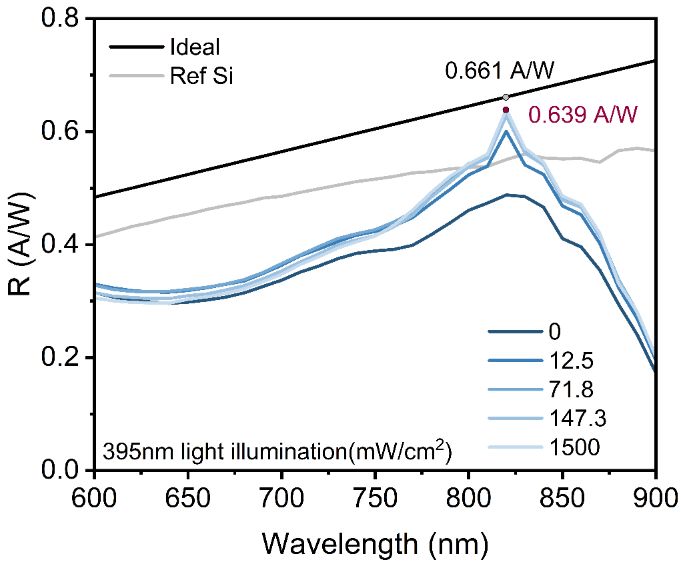
**

Supplementary Figure 26. Responsivity of the PO-BPDs. A 395nm bias light was applied to enhance the responsivity of the near-infrared range. The dark line represents the ideal responsivity for achieving a theoretically limited external quantum efficiency of 100%. The grey line was the responsivity of a commercial standard Si photodetector.

Supplementary Figure 27. Characterization of parameters for the PO-NPDs and PO-BPDs. The voltage dependence switching test for a. PO-BPDs and b. PO-NPDs. The 470nm and 810nm monochromatic light at an intensity of 100 W/m2 was used as the signal light. c-d. the linear dynamic range measured at 810nm illumination for PO-BPDs and PO-NPDs, respectively. e-f. the specific detectivity D* of the devices. All parameters for the prepared devices have been summarized in Table S6.

Supplementary Figure 28. The charge extraction and C-F characteristics at different irradiation density. a. the charge extraction of perovskite-only devices measured at 530nm light illumination. Within the initial 5s, the light was applied to get steady. At the moment of 5s, the light was turned off, and at the same time, the charge was collected. b. the capacitance-frequency curves as the function of radiation intensity.

Supplementary Figure 29. EQE for devices with different thicknesses of the photoactive layer. a-b. the EQE curves for perovskite-only devices at 200nm and 1100 thicknesses, respectively. c-d. EQE tested for organic devices with thicknesses of 120nm and 250nm, respectively. A 530nm bias light was applied.

Supplementary Figure 30. The light dependence PPG signals. The inset captions represent the intensity of testing light of 810nm.


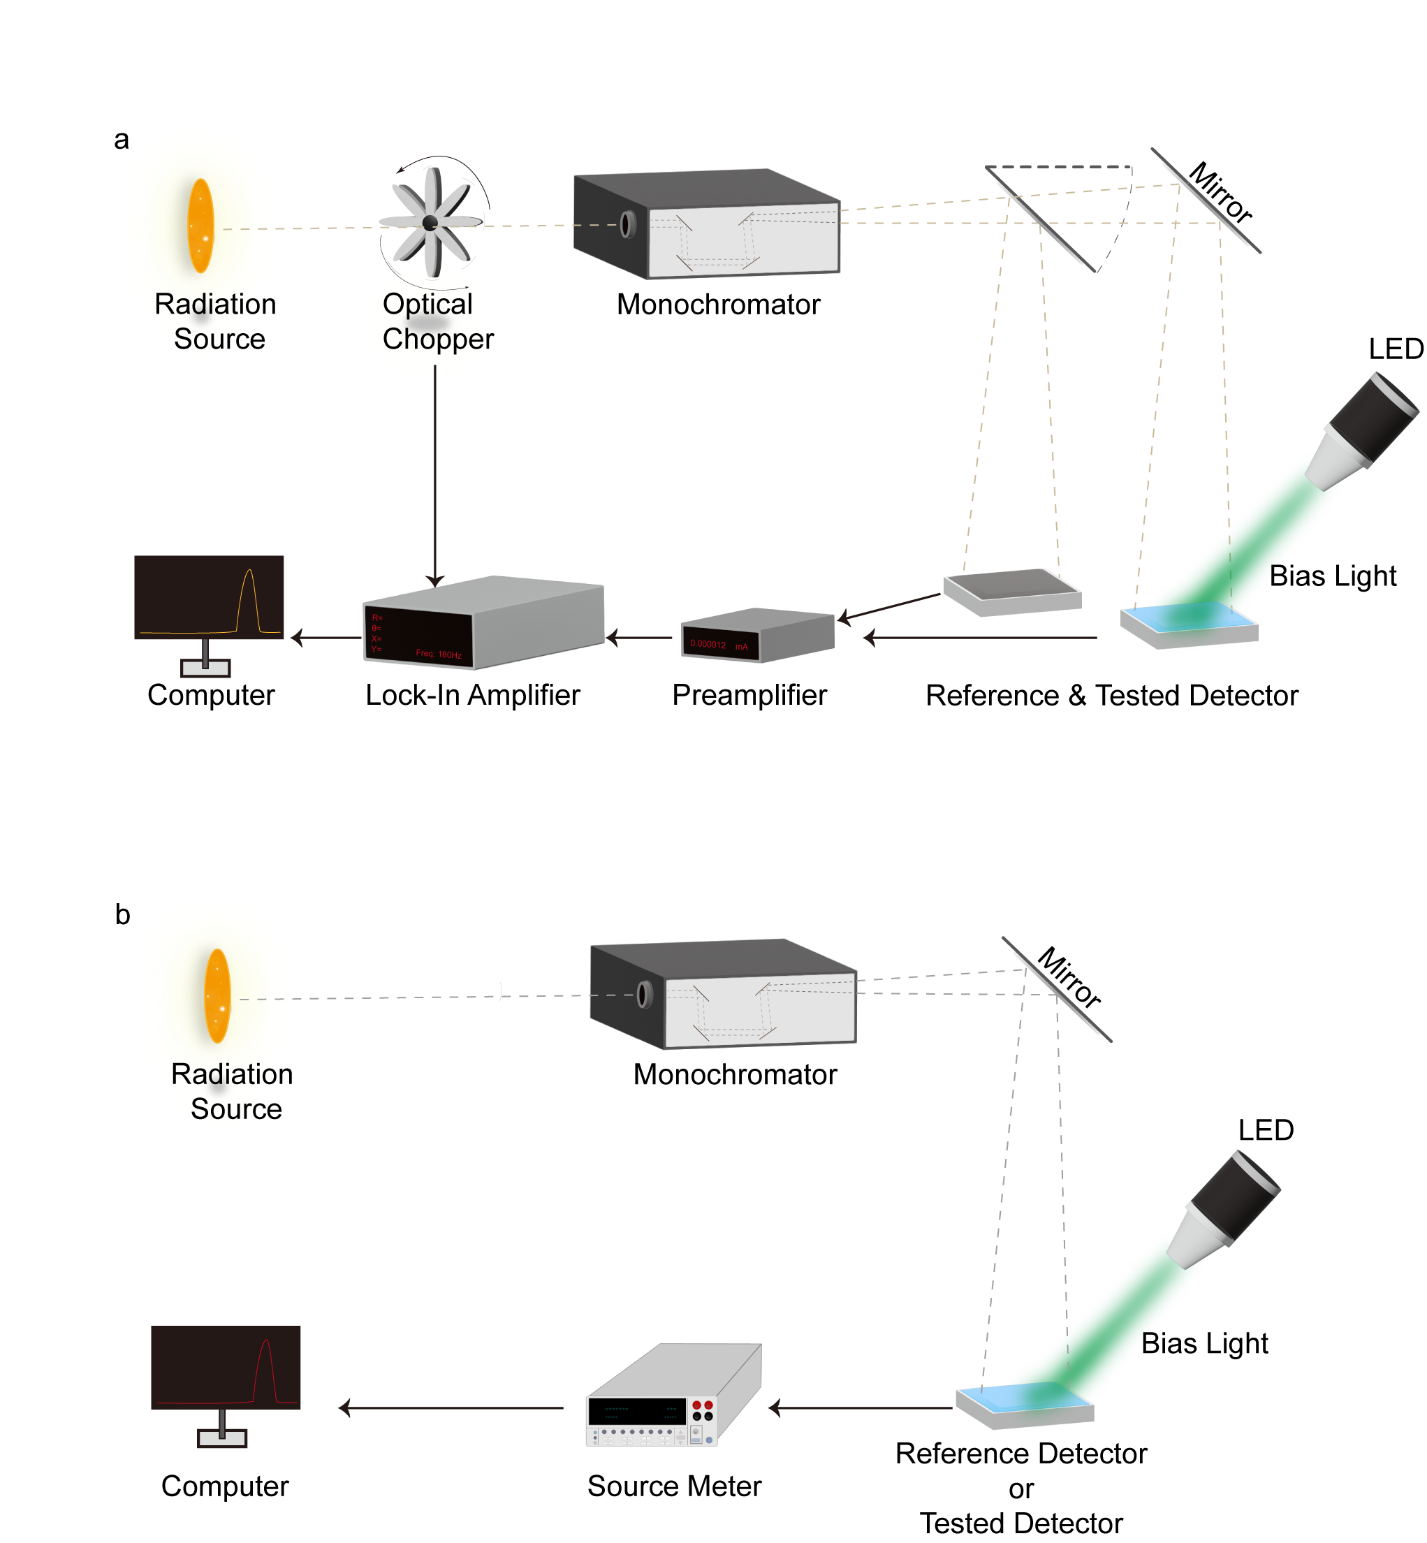


Supplementary Figure 31. Schematic illustration of the test system for EQE and responsivity test. a. the test system that utilizes a lock-in amplifier as the data acquisition. b. the test system utilizes a source meter to collect data. The test step and discrimination were discussed and can be seen in Supplementary Text 1.

Supplementary Table 1.

Summary of fitted parameters of electrochemical impedance spectroscopy at different light intensities.

| Light Intensity  (W/m2) | Rs (Ω) | Rct (Ω) | CPE1 | Rrec (Ω) | CPE2 |
| --- | --- | --- | --- | --- | --- |
| dark | 45.2 | 837 | 1.17 | 12.3M | 973m |
| 10 | 24 | 378 | 1.07 | 16.7k | 896m |
| 20 | 23.9 | 337 | 1.11 | 7.10k | 876m |
| 50 | 24.5 | 208 | 1.15 | 3.32k | 842m |
| 100 | 25.8 | 146 | 1.16 | 2.10k | 814m |
| 200 | 28 | 90.5 | 1.22 | 1.43k | 781m |
| 300 | 26.6 | 54.2 | 1.29 | 1.27k | 732m |

Supplementary Table 2.

Summary of fIMVS and calculated charge recombination time constant for IMVS test.

| Light intensity  (W/m2) | fIMVS (kHz) | τrec |
| --- | --- | --- |
| 50 | 0.559 | 2.85E-4 |
| 100 | 0.878 | 1.81E-4 |
| 200 | 1.378 | 1.15E-4 |
| 300 | 1.727 | 9.22E-5 |

Supplementary Table 3.

Fitting parameters in the TA decay traces

| Bias light intensity (mW/cm2) | A1 | τ1  (ns) | A2 | τ2  (ns) |
| --- | --- | --- | --- | --- |
| W/O | -0.514 | 0.561 | -0.486 | 6.7 |
| 10 | -0.522 | 0.507 | -0.478 | 7.18 |
| 50 | -0.512 | 0.465 | -0.488 | 6.08 |

Supplementary Table 4

Summary of fIMPS and calculated charge transformation time constant for the IMPS test, corresponding to the result shown in Figure 4d-e.

| Light intensity  (W/m2) | fIMPS (kHz) | τtr |
| --- | --- | --- |
| 0 | 10.615 | 1.49934E-5 |
| 50 | 11.149 | 1.42753E-5 |
| 100 | 11.060 | 1.43901E-5 |
| 200 | 11.149 | 1.42753E-5 |
| 500 | 11.149 | 1.42753E-5 |

Supplementary Table 5.

Summary of fIMPS and calculated charge transformation time constant for IMPS test, corresponding to the date shown in Figure S17.

| Light intensity  (W/m2) | fIMPS (kHz) | τtr |
| --- | --- | --- |
| 50 | 45.061 | 3.53199E-6 |
| 100 | 44.663 | 3.56346E-6 |
| 200 | 46.252 | 3.44104E-6 |
| 300 | 47.047 | 3.38289E-6 |

Supplementary Table 6.

Summary of parameters for high-performance PD-type photodetectors.

| Architecture | Type | Range  (nm) | SRR  for NPD | Rmax/Peak  (A/W)/(nm) | Rise/Fall time(μs) | D*  (Jones) | Ref |
| --- | --- | --- | --- | --- | --- | --- | --- |
| MAPbCl3/ MAPbBr2.5Cl0.5/ MAPbBr3 | NPD | 500-570 | 98.1 | 0.0045/531  estimated | -/1.35 | - | 2 |
| MAPbBr3/Bi3+-MAPbCl1.2Br1.8 | 550-600 | 790 | 0.013/570 | 8/137 | 1.5*1010 | 3 |
| FA0.85MA0.15PbI3 | 800-900 | 15 | 0.112/820 | - | 5.03*1012 | 4 |
| MAPbI3 | 790-830 | 5.32 | 0.063/800 | 12.7/6.9 | 1.27*1012 | 5 |
| NT812/Y6 | 780-950 | - | 0.451/860 | - | 2.4*1012 | 6 |
| PM6/Y6 | 850-950 | - | 0.194/892 | - | 2.12*1013 | 7 |
| DPP-DTT:PC70BM | 900-1000 | - | 0.06/940 |  | >1012 | 8 |
| PTB7-Th/PTB7-Th:CO8DFC:PC71BM | 750-1050 | 100 | 0.32/950 | 6.2/7.0 | >1011 | 9 |
| MAPbI3/CuSCN/PM6:Y6 | 750-950 | 245.5 | 0.485/810 | 39.5/60.8 | 8.03*1012 | 10 |
| FAMAPbI3/PFN-Br/PM6:Y6 | 780-950 | - | 0.55/850  estimated | 5.6/6.05 | 3*1013 | 11 |
| MAPBrxI3-x/PFN/PM6: NFA | 740-840 | 245 | 0.346/840 | 0.77/1.15 | 5.19*1012 | 12 |
| MAPbI3/PFN/PM6:Y6 | 770-900 | 35.7 | 0.577/850 | 1.73/0.97 | 1.52*1013 | 13 |
| **MAPbI3/PBQx-TF: BTP-eC9(2:1)** |  | **780-880** | **1547** | **0.40/820** | **2.05/2.40** | **1.43*1012** | **This work** |
| Er3+ doped CsPbI3 PQDs /BHJ | BPD | 200–1000 |  | 0.326/860 | 350/300 | 1.85*1012 | 14 |
| NaYF4@Yb/CsPbI2.2Br0.8 | - | 0.15/980 | - | - | 15 |
| PTB7-Th:IEICO-4F | 300-1000 | 0.43/850 | 7.5/9.2 | 5.6*1013 | 16 |
| PTB7-Th:COTIC-4F | 300-1100 | 0.52/920 | - | 1.7*1011 | 17 |
| Pb-Sn perovskites | 300-1100 | 0.582/850 | 0.0001 | - | 18 |
| FA0.85Cs0.15Sn0.5Pb0.5I3 | -1000 | 0.53/940 | 0.058/0.86 | 6*1012 | 19 |
| Cs0.05[(FA)0.83(MA)0.17]0.95Pb(I0.9Br0.1)3/ PM7:Y6 | 300-950 | 0.44/840 | 7.7/12.3 | 4.7*1012 | 20 |
| PTB7-Th:COTCN2 | 300-1200 | 0.23/1000 | - | 1.18*1012 | 21 |
| PTB7-Th:COTIC-4F | 300-1100 | 0.42/940 | 21/24 | 1.25*1013 | 22 |
| PTB7-Th:COTIC-4F:Y6 | 400-1000 | 0.42/960 | 13.6/12.5 | 8.2*1012 | 23 |
| MAPbI3/F8IC:PTB7-Th | 400-1000 | 0.37/870 | 35/20 | 2.3*1011 | 24 |
| MAPbI3/PM6:Y6 | 300-1000 | 0.52/830 | 0.80/0.69 | 2.86*1012 | 25 |
| **MAPbI3/PBQx-TF: BTP-eC9(1:5)** |  | **300-950** |  | **0.639/820** | **2.31/2.45** | **4.11*1012** | **This work** |

Supplementary Video 1

A demonstration video showing the bias light- regulated probe light response at frequency domain space after FFT transformation.

Supplementary Video 2

A demonstration video showcasing the bias light-enhanced response time of photodetector.

Reference：

1. Bielecki, Z. *et al.* Review of photodetectors characterization methods. *Bull. Pol. Acad. Sci. Tech. Sci*. **70**, e140534 (2022).

2. Wang, X. *et al.* High spectral rejection ratio narrowband photodetectors based on perovskite heterojunctions. *Advanced Electronic Materials*. **8**, 2200178 (2022).

3. Xue, L. *et al.* Fast response high spectral rejection ratio self-filtered ultranarrowband photodetectors based on perovskite single-crystal heterojunctions. *ACS Applied Materials & Interfaces*. **15**, 54050-54059 (2023).

4. Yu, S. *et al.* Ion migration as a new paradigm to boost self‐driven perovskite narrowband photodetectors. *Advanced Optical Materials*. **11**, 2300302 (2023).

5. Wang, J. *et al.* Self-driven perovskite narrowband photodetectors with tunable spectral responses. *Advanced Materials*. **33**, 2005557 (2021).

6. Xie, B. *et al.* Self-filtering narrowband high performance organic photodetectors enabled by manipulating localized frenkel exciton dissociation. *Nature Communications*. **11**, 2871 (2020).

7. Liu, Q. *et al.* Electron-donating amine-interlayer induced n-type doping of polymer:nonfullerene blends for efficient narrowband near-infrared photo-detection. *Nature Communications*. **13**, 5194 (2022).

8. Armin, A., Jansen-van Vuuren, R. D., Kopidakis, N., Burn, P. L. & Meredith, P. Narrowband light detection via internal quantum efficiency manipulation of organic photodiodes. *Nature Communications*. **6**, 6343 (2015).

9. Lan, Z. *et al.* Filter‐free band‐selective organic photodetectors. *Advanced Optical Materials*. **8**, 2001388 (2020).

10. Liu, Z. *et al.* Narrowband near-infrared photodetector enabled by dual functional internal-filter-induced selective charge collection. *Advanced Optical Materials*. **9**, 2100288 (2021).

11. Ollearo, R. *et al.* Vitality surveillance at distance using thin-film tandemlike narrowband near-infrared photodiodes with lightenhanced responsivity. *Science Advances*. **9**, eadf9861 (2023).

12. Zhang, Y. *et al.* Quasi-tandem photodetector with tunable narrowband response and submicrosecond response time: charge-selected transmitting narrowing. *ACS Photonics*. **10**, 3521-3530 (2023).

13. Zhang, Y. *et al.* High-performance near-infrared photodetectors based on the synergy effect of short wavelength light filter and long wavelength response of a perovskite/polymer hybrid structure. *ACS Applied Materials & Interfaces*. **13**, 61818-61826 (2021).

14. Ding, N. *et al.* A novel approach for designing efficient broadband photodetectors expanding from deep ultraviolet to near infrared. *Light Sci Appl*. **11**, 91 (2022).

15. Xie, H. *et al.* Lateral heterostructured vis–NIR photodetectors with multimodal detection for rapid and precise classification of glioma. *ACS Nano*. **16**, 16563-16573 (2022).

16. Yang, W. *et al.* Mitigating dark current for high-performance near-infrared organic photodiodes via charge blocking and defect passivation. *ACS Applied Materials & Interfaces*. **13**, 16766-16774 (2021).

17. Lee, J. *et al.* Side-chain engineering of nonfullerene acceptors for near-infrared organic photodetectors and photovoltaics. *ACS Energy Letters*. **4**, 1401-1409 (2019).

18. Morteza Najarian, A. *et al.* Sub-millimetre light detection and ranging using perovskites. *Nature Electronics*. **5**, 511-518 (2022).

19. Liu, H. *et al.* Double-side crystallization tuning to achieve over 1 μm thick and well-aligned block-like narrow-bandgap perovskites for high-efficiency near-infrared photodetectors. *Advanced Functional Materials*. **31**, 2010532 (2021).

20. Nodari, D. *et al.* Dark current in broadband perovskite–organic heterojunction photodetectors controlled by interfacial energy band offset. *Advanced Materials*, 2401206 (2024).

21. Ha, J. W. *et al.* Effect of cyano substitution on non‐fullerene acceptor for near‐infrared organic photodetectors above 1000 nm. *Advanced Functional Materials*. **33**, 2211486 (2022).

22. Simões, J., Dong, T. & Yang, Z. Non‐fullerene acceptor organic photodetector for skin‐conformable photoplethysmography applications. *Advanced Materials Interfaces*. **9**, 2101897 (2022).

23. Xu, C., Liu, P., Feng, C., He, Z. & Cao, Y. Organic photodetectors with high detectivity for broadband detection covering UV-vis-NIR. *Journal of Materials Chemistry C*. **10**, 5787-5796 (2022).

24. Li, C. *et al.* Ultrafast and broadband photodetectors based on a perovskite/organic bulk heterojunction for large-dynamic-range imaging. *Light-Science & Applications*. **9**, 31 (2020).

25. Zhang, Y. *et al.* High‐performance MAPbI3 /PM6:Y6 perovskite/organic hybrid photodetectors with a broadband response. *Advanced Optical Materials*. **10**, 2200648 (2022).
