# Supplementary material for: Bias Light Driving Enables Bandwidth Tunable Photodetectors and Its Applications
Source: Research Square preprint supplement (doi:10.21203/rs.3.rs-5229846/v1), 2024-11-27
Supplement: Supplementary file 2 [file c4738095565b62ce64014cd9.xlsx]

## Sheet: Fig. 1B
Wavelength(nm)	MAPbI3(Trans%)	PBQx-TF(Norm. Abs)	BTP-eC9(Norm. Abs)
300	0.2	0.17949	0.06825
305	0.5	0.20513	0.10979
310	0.2	0.21581	0.1454
315	0.2	0.21795	0.18694
320	0.1	0.22009	0.21662
325	0.1	0.22222	0.23442
330	0.1	0.22863	0.24332
335	0.1	0.23504	0.24926
340	0.1	0.24359	0.25519
345	0.1	0.25	0.25519
350	0.1	0.25641	0.24629
355	0.1	0.26068	0.23145
360	0.1	0.26282	0.21068
365	0.1	0.26282	0.18991
370	0.1	0.25855	0.1632
375	0.1	0.25427	0.1365
380	0.1	0.24786	0.11869
385	0.1	0.24786	0.10682
390	0.1	0.24786	0.09792
395	0.1	0.24786	0.09496
400	0.1	0.24573	0.09199
405	0.1	0.24359	0.08902
410	0.1	0.24145	0.08309
415	0.1	0.24359	0.07418
420	0.1	0.25	0.06825
425	0.1	0.26282	0.06825
430	0.1	0.27564	0.06825
435	0.1	0.29274	0.07122
440	0.1	0.3141	0.07418
445	0.1	0.33547	0.08012
450	0.1	0.35897	0.08605
455	0.1	0.38462	0.09199
460	0.1	0.41239	0.10089
465	0.1	0.44444	0.10386
470	0.1	0.4765	0.10979
475	0.1	0.51496	0.11869
480	0.1	0.55342	0.1276
485	0.1	0.59615	0.1365
490	0.1	0.63889	0.1454
495	0.1	0.68376	0.15134
500	0.1	0.72863	0.16024
505	0.1	0.77564	0.16617
510	0.1	0.82265	0.16914
515	0.1	0.87179	0.17211
520	0.1	0.91667	0.17507
525	0.1	0.95726	0.17507
530	0.1	0.98504	0.17804
535	0.1	1	0.17507
540	0.1	0.99786	0.17507
545	0.1	0.98504	0.16914
550	0.1	0.97222	0.16617
555	0.1	0.96795	0.16024
560	0.1	0.9765	0.15727
565	0.1	0.99145	0.15134
570	0.1	0.99573	0.15134
575	0.1	0.97863	0.1543
580	0.1	0.92735	0.15727
585	0.1	0.84188	0.16024
590	0.1	0.72863	0.16617
595	0.1	0.60256	0.17211
600	0.1	0.47863	0.18101
605	0.1	0.37607	0.18991
610	0.2	0.29915	0.20178
615	0.2	0.24359	0.21365
620	0.2	0.20299	0.22552
625	0.2	0.17521	0.24036
630	0.3	0.15385	0.25223
635	0.3	0.13675	0.26706
640	0.3	0.12393	0.27893
645	0.4	0.11325	0.28783
650	0.4	0.10256	0.29674
655	0.5	0.09615	0.30267
660	0.5	0.08974	0.31157
665	0.6	0.08333	0.31454
670	0.7	0.07906	0.31751
675	0.7	0.07265	0.32344
680	0.8	0.06838	0.32938
685	0.9	0.0641	0.33828
690	1	0.06197	0.35015
695	1.1	0.05769	0.36202
700	1.2	0.05556	0.37685
705	1.3	0.05128	0.39466
710	1.4	0.04915	0.41246
715	1.6	0.04701	0.43027
720	1.7	0.04487	0.45104
725	1.9	0.04487	0.46588
730	2	0.04274	0.48368
735	2.1	0.0406	0.49555
740	2.3	0.0406	0.51039
745	2.4	0.03846	0.51929
750	2.7	0.03632	0.52819
755	3.4	0.03632	0.53412
760	4.6	0.03632	0.54006
765	7	0.03419	0.55193
770	10.9	0.03419	0.56083
775	15.8	0.03419	0.57864
780	20.6	0.03205	0.59941
785	24.5	0.03205	0.62611
790	27.4	0.03205	0.65875
795	29.7	0.03205	0.69436
800	31.6	0.03205	0.73294
805	33.3	0.02991	0.77745
810	35	0.02991	0.82196
815	36.6	0.02991	0.86647
820	38.1	0.02991	0.90504
825	39.6	0.02991	0.94065
830	41.1	0.02778	0.96736
835	42.4	0.02778	0.9911
840	43.6	0.02564	1
845	44.7	0.02564	0.99703
850	45.6	0.02564	0.97626
855	46.4	0.02564	0.94362
860	47	0.02564	0.89318
865	47.4	0.02564	0.82789
870	47.8	0.02564	0.75371
875	48.1	0.02564	0.67359
880	48.4	0.02564	0.59347
885	48.6	0.02564	0.51632
890	48.9	0.02564	0.4451
895	49.2	0.02564	0.37982
900	49.4	0.02564	0.32344
905	49.8	0.02564	0.27596
910	50.2	0.0235	0.23442
915	50.8	0.0235	0.20178
920	51.4	0.0235	0.17507
925	52.1	0.0235	0.15134
930	52.8	0.0235	0.13353
935	53.7	0.0235	0.11869
940	54.6	0.0235	0.10386
945	55.6	0.0235	0.09496
950	56.7	0.02137	0.08605
955	57.8	0.02137	0.07715
960	58.9	0.02137	0.07122
965	60	0.02137	0.06528
970	61.2	0.02137	0.05935
975	62.3	0.02137	0.05638
980	63.4	0.01923	0.05341
985	64.4	0.01923	0.05045
990	65.3	0.01923	0.04451
995	66.1	0.01923	0.04154
1000	66.8	0.01709	0.04154
1005	67.3	0.01709	0.03858
1010	67.8	0.01709	0.03561
1015	68.1	0.01709	0.03264
1020	68.3	0.01496	0.02967
1025	68.4	0.01496	0.02671
1030	68.4	0.01496	0.02671
1035	68.3	0.01282	0.02374
1040	68.1	0.01282	0.02077
1045	67.9	0.01068	0.02077
1050	67.6	0.01068	0.0178
1055	67.2	0.00855	0.01484
1060	66.9	0.00855	0.01484
1065	66.5	0.00855	0.01187
1070	66.2	0.00641	0.01187
1075	65.9	0.00641	0.0089
1080	65.6	0.00427	0.00593
1085	65.4	0.00427	0.00593
1090	65.1	0.00214	0.00297
1095	65	0.00214	0.00297
1100	64.9	0	0

## Sheet: Fig.1D
Wavelength(nm)	200		800		1100		1600
	W/o	w/	W/o	w/	W/o	w/	W/o	w/
300	0.01211	0.00307	0.01023	0.00215	0.00374	0.00121	0.00164	0.00175
310	0.07347	0.01977	0.06704	0.01268	0.02695	0.00439	0.0013	0.0012
320	0.18853	0.05356	0.17327	0.03492	0.08086	0.0133	0.0013	0.000722738
330	0.288	0.08009	0.27027	0.05541	0.12821	0.02128	0.00179	0.000679635
340	0.33905	0.09136	0.31434	0.06309	0.1528	0.02476	0.00192	0.000701603
350	0.35063	0.095	0.32488	0.06527	0.15944	0.02669	0.0019	0.000772049
360	0.35373	0.09626	0.32532	0.06565	0.16048	0.02601	0.00178	0.000761808
370	0.35811	0.09757	0.32787	0.0663	0.15992	0.02596	0.0017	0.000844554
380	0.35683	0.09679	0.32169	0.06585	0.15679	0.02549	0.00146	0.000806777
390	0.37348	0.1021	0.33257	0.06837	0.16088	0.0265	0.00138	0.000871505
400	0.40196	0.10985	0.35389	0.07353	0.17029	0.02827	0.00136	0.000953618
410	0.4249	0.11728	0.37204	0.07788	0.17729	0.0297	0.00134	0.00101
420	0.4451	0.12288	0.38557	0.0815	0.1832	0.03111	0.00129	0.00107
430	0.46033	0.1283	0.39801	0.08484	0.18853	0.03245	0.00129	0.00112
440	0.47345	0.13197	0.40598	0.08777	0.19185	0.03363	0.00124	0.00118
450	0.4774	0.13492	0.40913	0.08895	0.19543	0.03424	0.00118	0.00124
460	0.48103	0.13666	0.41069	0.09021	0.19519	0.03479	0.0011	0.00127
470	0.47728	0.13595	0.40548	0.09022	0.19376	0.03508	0.00103	0.00131
480	0.47536	0.13664	0.4047	0.09071	0.19416	0.03543	0.00104	0.00132
490	0.47073	0.13654	0.40236	0.0905	0.19351	0.03579	0.000994383	0.00134
500	0.46948	0.13781	0.40145	0.09063	0.19354	0.03617	0.001	0.00136
510	0.4669	0.13933	0.39785	0.09025	0.19351	0.03662	0.001	0.00137
520	0.4671	0.14354	0.39612	0.09068	0.19378	0.03743	0.00101	0.0014
530	0.46812	0.14851	0.39297	0.09128	0.19451	0.03818	0.00103	0.00144
540	0.4687	0.15555	0.39146	0.09169	0.19447	0.03923	0.00105	0.00146
550	0.47001	0.16397	0.38954	0.09258	0.19478	0.04022	0.00106	0.00149
560	0.47552	0.17442	0.39149	0.09398	0.19633	0.0417	0.00112	0.0015
570	0.4853	0.18607	0.3927	0.09636	0.19846	0.04329	0.00118	0.00151
580	0.49227	0.19912	0.39276	0.09901	0.19864	0.04495	0.00124	0.00155
590	0.50505	0.21444	0.39651	0.10222	0.20139	0.0469	0.00132	0.00158
600	0.51324	0.2257	0.39869	0.10561	0.20333	0.04908	0.00144	0.0016
610	0.5024	0.22735	0.40112	0.10905	0.20719	0.05147	0.00157	0.00164
620	0.48134	0.22884	0.40654	0.11405	0.20985	0.05379	0.00171	0.00171
630	0.4703	0.23575	0.41108	0.11978	0.21183	0.05647	0.0019	0.00179
640	0.47209	0.24503	0.41426	0.12446	0.2156	0.05937	0.00219	0.0019
650	0.48525	0.25895	0.4167	0.12789	0.21999	0.06237	0.00247	0.00204
660	0.50453	0.27274	0.41619	0.13217	0.2222	0.06549	0.00285	0.00216
670	0.53073	0.29309	0.42132	0.13712	0.22545	0.0684	0.00322	0.00234
680	0.55776	0.31397	0.42967	0.14422	0.22917	0.07185	0.00364	0.00261
690	0.57701	0.33117	0.44127	0.15152	0.23207	0.07496	0.00415	0.00285
700	0.58435	0.34436	0.44588	0.15831	0.23363	0.07801	0.0049	0.00316
710	0.59332	0.35181	0.45212	0.16374	0.23793	0.08132	0.00541	0.00357
720	0.59243	0.35818	0.45363	0.16832	0.2396	0.08385	0.00618	0.00392
730	0.5955	0.36153	0.45479	0.17116	0.24381	0.08638	0.00657	0.00427
740	0.59476	0.36606	0.4535	0.17465	0.24575	0.08948	0.00745	0.00477
750	0.60148	0.38385	0.46201	0.19108	0.25387	0.09952	0.01002	0.0064
760	0.63077	0.4472	0.50093	0.26287	0.29524	0.14645	0.02449	0.01842
770	0.65758	0.51536	0.54046	0.36856	0.36516	0.23693	0.08428	0.06815
780	0.67726	0.57076	0.58353	0.48464	0.46576	0.3748	0.23304	0.20829
790	0.68848	0.59373	0.62507	0.55723	0.53056	0.46529	0.3607	0.34327
800	0.69662	0.60805	0.65171	0.59766	0.5569	0.49932	0.42816	0.40461
810	0.7121	0.62695	0.66353	0.6162	0.57271	0.52231	0.45113	0.43264
820	0.7325	0.66363	0.66986	0.63447	0.59621	0.55227	0.47215	0.46261
830	0.70597	0.64674	0.63542	0.60902	0.55971	0.52411	0.46058	0.45876
840	0.672	0.624	0.59765	0.57241	0.53514	0.5073	0.44943	0.44549
850	0.54944	0.52581	0.51209	0.49741	0.45655	0.43185	0.40155	0.3957
860	0.46224	0.43773	0.48289	0.46788	0.41684	0.39416	0.38561	0.38041
870	0.32546	0.30343	0.40447	0.38674	0.33672	0.31581	0.32898	0.32375
880	0.18646	0.17171	0.27588	0.26194	0.22551	0.20991	0.23505	0.23364
890	0.11862	0.10819	0.17662	0.16629	0.16208	0.14918	0.18006	0.17721
900	0.06314	0.05656	0.08638	0.08116	0.09623	0.08875	0.11638	0.11365
910	0.03276	0.02929	0.04164	0.03896	0.05394	0.04985	0.07122	0.06963
920	0.01986	0.01753	0.02349	0.02194	0.03441	0.03193	0.04908	0.0482
930	0.00949	0.00842	0.00987	0.00932	0.01752	0.01635	0.02616	0.0256
940	0.00574	0.00503	0.00564	0.00529	0.01107	0.01035	0.01667	0.0163
950	0.00334	0.00289	0.00319	0.00298	0.00672	0.00629	0.00966	0.00943
960	0.00192	0.00168	0.00182	0.00167	0.00407	0.00383	0.00572	0.00564
970	0.0011	0.000931733	0.00105	0.000997756	0.00243	0.00228	0.00309	0.00303
980	0.000707444	0.000600317	0.000706772	0.000660904	0.00158	0.00148	0.00189	0.00187
990	0.000425455	0.000349312	0.000446365	0.000432851	0.000993877	0.000934814	0.0011	0.00113
1000	0.000363424	0.000298233	0.00038976	0.000365774	0.000757767	0.000716443	0.00094588	0.0009174

## Sheet: Fig. 1E
Wavelength (nm)	EQE(%)
	90						120						180						250
Wavelength(nm)	dark	5	30	120	190		dark	5	30	120	190		dark	5	30	120	190		dark	5	30	120	190
300	0.00613	0.00543	0.00277	0.00195	0.00166		0.00539	0.00542	0.00256	0.00167	0.00148		0.00522	0.00453	0.00153	0.00149	0.00195		0.00559	0.00337	0.0014	0.00221	0.00162
310	0.03818	0.03732	0.01987	0.0112	0.00989		0.03441	0.03	0.01341	0.00641	0.00428		0.03459	0.02285	0.0071	0.00176	0.00127		0.0365	0.02013	0.00283	0.00101	0.00144
320	0.10672	0.09584	0.05355	0.031	0.02722		0.09669	0.08266	0.03675	0.01803	0.01285		0.09856	0.06443	0.01969	0.00541	0.00267		0.10339	0.05217	0.00916	0.00158	0.00102
330	0.16968	0.14719	0.08317	0.0507	0.0449		0.15395	0.12674	0.05892	0.02877	0.02082		0.15558	0.098	0.0305	0.00878	0.00459		0.16319	0.07783	0.01407	0.0031	0.0014
340	0.20108	0.17656	0.09695	0.0586	0.05184		0.18142	0.14904	0.0672	0.03492	0.02459		0.18199	0.11345	0.03677	0.01043	0.00545		0.19084	0.0894	0.01641	0.00346	0.00173
350	0.21337	0.18603	0.10302	0.06201	0.0552		0.1918	0.15449	0.06999	0.03562	0.0269		0.19119	0.11912	0.03703	0.01096	0.00579		0.19938	0.09215	0.01667	0.00369	0.00188
360	0.21411	0.18566	0.10213	0.06223	0.05525		0.1917	0.1542	0.06927	0.03561	0.02612		0.19095	0.11761	0.037	0.0109	0.0058		0.19708	0.08928	0.01643	0.00385	0.00184
370	0.21305	0.18368	0.10123	0.0618	0.05483		0.18981	0.15175	0.0681	0.0353	0.02599		0.18822	0.11601	0.03627	0.01087	0.00576		0.19197	0.08629	0.016	0.00369	0.00194
380	0.20507	0.17893	0.09753	0.05989	0.05317		0.18275	0.14599	0.06517	0.03423	0.02517		0.18073	0.11205	0.03476	0.0104	0.00562		0.18261	0.08203	0.01512	0.00354	0.00178
390	0.20811	0.17927	0.099	0.06121	0.05438		0.18463	0.14677	0.06526	0.03456	0.02572		0.18243	0.11273	0.0348	0.01059	0.0058		0.1828	0.08157	0.0153	0.00354	0.00184
400	0.21835	0.18821	0.10326	0.06413	0.05716		0.19315	0.15262	0.06793	0.03623	0.02712		0.18908	0.11749	0.03619	0.01111	0.00607		0.18808	0.08401	0.01526	0.00369	0.00196
410	0.22665	0.19449	0.10681	0.06643	0.05928		0.19888	0.15641	0.06953	0.03743	0.02804		0.19381	0.11982	0.03703	0.01163	0.00629		0.19157	0.08475	0.01544	0.00382	0.002
420	0.2322	0.19984	0.10943	0.06856	0.06116		0.20156	0.15826	0.0707	0.03824	0.02886		0.19457	0.12068	0.03746	0.01159	0.00656		0.19002	0.08381	0.01539	0.00385	0.00211
430	0.23789	0.20341	0.11202	0.07036	0.06317		0.20153	0.15881	0.07043	0.03833	0.0295		0.19415	0.12121	0.03702	0.01182	0.00668		0.17918	0.08098	0.01497	0.00387	0.00217
440	0.24326	0.2077	0.11463	0.07245	0.06514		0.20392	0.15918	0.071	0.03927	0.03051		0.19496	0.12204	0.03725	0.01204	0.00694		0.17718	0.07956	0.01482	0.00396	0.00223
450	0.24787	0.21094	0.11648	0.0748	0.06738		0.20947	0.16443	0.0731	0.04093	0.0321		0.19899	0.12406	0.03809	0.01242	0.00717		0.18271	0.08255	0.01519	0.00406	0.00235
460	0.24983	0.2137	0.11831	0.07674	0.06904		0.2124	0.16537	0.07527	0.04215	0.03253		0.20079	0.12581	0.03872	0.01262	0.00752		0.18611	0.08403	0.01564	0.0042	0.00238
470	0.25228	0.21625	0.1199	0.07749	0.07008		0.21405	0.16763	0.07637	0.04327	0.03315		0.20106	0.12787	0.03911	0.01282	0.00745		0.1874	0.08513	0.01579	0.00425	0.00243
480	0.25486	0.21844	0.12077	0.07888	0.07093		0.21766	0.16978	0.07725	0.04451	0.03367		0.20351	0.1284	0.03947	0.01289	0.00751		0.19243	0.08736	0.01616	0.00431	0.00246
490	0.25832	0.21992	0.12186	0.08007	0.07226		0.22005	0.17206	0.07818	0.04487	0.03419		0.20558	0.12923	0.03995	0.01303	0.00763		0.19565	0.08892	0.01629	0.00441	0.00247
500	0.26044	0.22211	0.12313	0.08119	0.07325		0.22296	0.17443	0.07936	0.04566	0.03462		0.20788	0.13072	0.04024	0.01315	0.00776		0.1987	0.09034	0.01663	0.00443	0.00252
510	0.262	0.22428	0.12384	0.0822	0.0741		0.22431	0.17506	0.08031	0.04614	0.03507		0.20883	0.13142	0.04047	0.01329	0.00784		0.20031	0.09107	0.0167	0.00445	0.00257
520	0.2648	0.22582	0.12572	0.08363	0.07517		0.22702	0.1773	0.0813	0.04719	0.0355		0.20988	0.1324	0.04089	0.01347	0.00789		0.20194	0.09204	0.01685	0.00456	0.00255
530	0.26941	0.22842	0.12832	0.08464	0.07678		0.23036	0.17901	0.08267	0.04816	0.03621		0.21234	0.13426	0.04149	0.0137	0.00809		0.2048	0.09314	0.01715	0.00462	0.00262
540	0.27052	0.22972	0.12783	0.08598	0.07758		0.2317	0.18057	0.0834	0.04885	0.03673		0.21391	0.1347	0.04182	0.01391	0.00818		0.20525	0.09364	0.01726	0.00463	0.00263
550	0.27123	0.23043	0.12971	0.08707	0.07881		0.23363	0.18129	0.08464	0.04972	0.03731		0.21401	0.13524	0.04212	0.01412	0.00828		0.20459	0.09397	0.01741	0.00474	0.00263
560	0.27411	0.2326	0.13079	0.08852	0.08003		0.23733	0.18324	0.0863	0.05062	0.03791		0.21468	0.13643	0.04258	0.01434	0.00841		0.20623	0.09466	0.01764	0.00481	0.00271
570	0.27753	0.23463	0.13278	0.09044	0.08148		0.23851	0.18616	0.08784	0.05176	0.03873		0.21733	0.13794	0.04332	0.01469	0.00855		0.20733	0.09539	0.01795	0.00487	0.00278
580	0.27877	0.23653	0.13412	0.09174	0.08284		0.24052	0.18722	0.08924	0.0528	0.03952		0.22034	0.13838	0.04384	0.01498	0.00878		0.20844	0.09639	0.01814	0.00504	0.00276
590	0.2827	0.23973	0.13616	0.09399	0.08476		0.24375	0.1895	0.09084	0.05406	0.04035		0.22101	0.14025	0.04457	0.01532	0.00892		0.21015	0.09733	0.01868	0.00521	0.00294
600	0.28593	0.24182	0.13798	0.09578	0.08629		0.24742	0.19237	0.09254	0.05618	0.04137		0.22337	0.14185	0.04527	0.01566	0.00913		0.21289	0.09854	0.01904	0.00539	0.00313
610	0.2882	0.24485	0.13997	0.09776	0.0879		0.24938	0.19354	0.09437	0.05707	0.04214		0.2251	0.14336	0.04599	0.01605	0.00932		0.21542	0.09951	0.01952	0.00571	0.00329
620	0.29038	0.24725	0.14202	0.10019	0.08959		0.25473	0.19639	0.09595	0.05808	0.04301		0.22734	0.14486	0.04656	0.01649	0.00961		0.21483	0.1001	0.02001	0.006	0.00354
630	0.29453	0.24978	0.14444	0.10201	0.09131		0.25543	0.19902	0.09802	0.05991	0.0439		0.22893	0.14597	0.04748	0.01692	0.00994		0.21686	0.10137	0.02069	0.00635	0.00384
640	0.2967	0.25272	0.14648	0.10375	0.09311		0.25773	0.20114	0.10009	0.06101	0.04478		0.23155	0.14747	0.04831	0.01749	0.01025		0.21933	0.10302	0.02133	0.00689	0.00422
650	0.30205	0.25585	0.14908	0.10656	0.09513		0.2614	0.20397	0.1023	0.06262	0.04596		0.23484	0.14939	0.04932	0.01807	0.01067		0.22223	0.10419	0.02223	0.00746	0.0048
660	0.30499	0.25858	0.15237	0.10855	0.0968		0.26591	0.2063	0.1044	0.06402	0.04687		0.23843	0.15155	0.05031	0.01869	0.01119		0.22503	0.10627	0.02335	0.00813	0.00537
670	0.30885	0.26183	0.15468	0.11076	0.09894		0.27036	0.20982	0.10643	0.06573	0.04816		0.24096	0.15406	0.05144	0.01948	0.01176		0.2275	0.10793	0.02441	0.0091	0.00612
680	0.31054	0.26456	0.1571	0.11303	0.10092		0.27136	0.21154	0.10896	0.06752	0.04928		0.24309	0.15535	0.0529	0.02033	0.01242		0.22969	0.10988	0.02574	0.01039	0.00712
690	0.31377	0.26724	0.15861	0.11484	0.10279		0.27405	0.2138	0.11062	0.0688	0.05074		0.24499	0.15682	0.05389	0.02113	0.01307		0.23161	0.11115	0.02714	0.01129	0.00801
700	0.31812	0.26937	0.16035	0.1165	0.1041		0.27812	0.21691	0.11232	0.07025	0.05144		0.24881	0.15901	0.05506	0.02199	0.01379		0.23587	0.11342	0.02842	0.01242	0.00905
710	0.31935	0.27283	0.16289	0.11893	0.1064		0.28075	0.21907	0.11448	0.07189	0.05267		0.25058	0.16137	0.05632	0.023	0.01455		0.23801	0.1152	0.03006	0.01353	0.0101
720	0.32314	0.27502	0.16507	0.12076	0.10782		0.28411	0.22129	0.11607	0.07345	0.0538		0.25447	0.16283	0.05736	0.02369	0.01525		0.24133	0.11723	0.0311	0.01452	0.01081
730	0.32523	0.2767	0.16644	0.12242	0.10966		0.28534	0.22201	0.11746	0.07462	0.0548		0.25501	0.16396	0.05843	0.02449	0.01585		0.24205	0.1181	0.03229	0.01546	0.01185
740	0.32856	0.27892	0.168	0.12417	0.11123		0.28756	0.22424	0.11904	0.07558	0.05564		0.25742	0.16518	0.05939	0.02523	0.0165		0.24427	0.11937	0.03344	0.01636	0.01258
750	0.33185	0.28259	0.1724	0.12794	0.11496		0.29317	0.229	0.12334	0.07944	0.05878		0.26299	0.16898	0.06259	0.02784	0.01892		0.25062	0.12482	0.03785	0.02018	0.01588
760	0.34967	0.30297	0.19481	0.14894	0.13488		0.31225	0.25033	0.14568	0.09962	0.07631		0.28147	0.19058	0.08257	0.04403	0.03347		0.2756	0.15312	0.06451	0.04205	0.03538
770	0.37404	0.33906	0.23891	0.19535	0.18047		0.34334	0.29198	0.19629	0.14973	0.12345		0.31881	0.23784	0.13598	0.09266	0.07745		0.32242	0.2166	0.12651	0.09505	0.08121
780	0.39909	0.38489	0.31385	0.28117	0.26739		0.38951	0.35999	0.29249	0.25469	0.22417		0.38104	0.33004	0.24735	0.19194	0.16654		0.40298	0.32752	0.24151	0.18665	0.15934
790	0.40818	0.41232	0.37226	0.34984	0.34115		0.41849	0.41123	0.36878	0.33478	0.30687		0.42039	0.39241	0.32771	0.27194	0.23931		0.44915	0.40446	0.31544	0.25234	0.21361
800	0.42087	0.43408	0.40381	0.39041	0.38218		0.43714	0.43934	0.40613	0.37813	0.34935		0.44148	0.42677	0.36758	0.3077	0.27252		0.46928	0.43265	0.35021	0.27786	0.23779
810	0.42945	0.44487	0.42002	0.40929	0.40198		0.4505	0.45407	0.42492	0.39872	0.36942		0.44684	0.43547	0.38542	0.32653	0.29227		0.47808	0.44508	0.36759	0.29639	0.2554
820	0.44933	0.45892	0.4419	0.43093	0.42244		0.46871	0.47698	0.45163	0.42653	0.39745		0.45389	0.45482	0.41078	0.3569	0.32335		0.46652	0.45999	0.3926	0.32672	0.28693
830	0.42416	0.43816	0.41582	0.40762	0.40103		0.44899	0.45889	0.43081	0.4071	0.38243		0.43925	0.43869	0.40123	0.35336	0.32179		0.45985	0.44943	0.38723	0.32725	0.29059
840	0.39411	0.41044	0.38831	0.37997	0.37298		0.42891	0.43774	0.41256	0.39219	0.36777		0.42886	0.42812	0.39643	0.3528	0.32573		0.45418	0.44244	0.38753	0.33697	0.29957
850	0.31832	0.33899	0.3201	0.31119	0.3042		0.36658	0.37952	0.35606	0.33849	0.31703		0.38504	0.38501	0.35778	0.33777	0.29986		0.4059	0.39487	0.35271	0.32268	0.2799
860	0.2738	0.29163	0.27556	0.26718	0.26153		0.33162	0.34362	0.32209	0.30452	0.28608		0.36751	0.36857	0.34401	0.31103	0.28911		0.38201	0.37426	0.3378	0.2987	0.27001
870	0.20551	0.21898	0.20682	0.2014	0.19696		0.2642	0.27177	0.25679	0.24194	0.22708		0.31505	0.31523	0.29397	0.26518	0.24478		0.31959	0.31408	0.28623	0.2516	0.22679
880	0.14032	0.14523	0.13873	0.13558	0.13292		0.18203	0.18502	0.17564	0.17101	0.15996		0.23015	0.23221	0.21547	0.19845	0.18255		0.22737	0.22911	0.2082	0.18756	0.16847
890	0.09638	0.1017	0.09644	0.09382	0.09314		0.13381	0.13698	0.13007	0.12288	0.11535		0.17996	0.17979	0.16693	0.14857	0.13536		0.18299	0.18167	0.16479	0.14287	0.12711
900	0.05735	0.06124	0.05796	0.05694	0.05632		0.08256	0.08502	0.0797	0.07602	0.07162		0.1141	0.11423	0.10503	0.09373	0.08553		0.12105	0.1202	0.10839	0.09389	0.08378
910	0.03299	0.03601	0.03407	0.03339	0.03305		0.04873	0.05065	0.04757	0.0451	0.04252		0.07054	0.07093	0.06232	0.05537	0.05074		0.07915	0.0775	0.06985	0.05855	0.05209
920	0.02216	0.02422	0.02282	0.0224	0.02254		0.03264	0.03425	0.03216	0.03024	0.02857		0.0446	0.04459	0.04108	0.03643	0.03372		0.05107	0.05022	0.04598	0.04029	0.03585
930	0.01145	0.01267	0.01198	0.01172	0.01165		0.01727	0.0179	0.01684	0.01598	0.0151		0.02314	0.02319	0.02118	0.0189	0.01739		0.02743	0.02698	0.02441	0.02135	0.01913
940	0.00754	0.00831	0.00787	0.00771	0.0076		0.01144	0.01192	0.01116	0.01051	0.00994		0.01517	0.0151	0.01383	0.01233	0.01139		0.01803	0.01775	0.01598	0.01402	0.01268
950	0.00458	0.00506	0.00473	0.00465	0.00456		0.00709	0.00741	0.00692	0.00654	0.00614		0.00934	0.00934	0.00848	0.00771	0.00712		0.01119	0.01099	0.00978	0.00855	0.00789
960	0.00279	0.00314	0.00298	0.0029	0.0028		0.00433	0.00453	0.00425	0.00397	0.00373		0.00601	0.00597	0.00547	0.00485	0.00445		0.00698	0.00686	0.0062	0.00541	0.00487
970	0.00155	0.00188	0.00166	0.00158	0.00155		0.00253	0.00275	0.00246	0.00232	0.00217		0.0037	0.00366	0.00337	0.00296	0.00276		0.00429	0.00418	0.0038	0.00326	0.00295
980	0.00101	0.00114	0.00105	0.00101	0.000991706		0.00157	0.00165	0.00153	0.00144	0.00135		0.00246	0.00244	0.00219	0.00194	0.00178		0.00283	0.00279	0.00246	0.00214	0.00191
990	0.000557133	0.000596819	0.000586027	0.000574661	0.000553474		0.000892454	0.000951982	0.000865832	0.000813143	0.000759804		0.00149	0.00148	0.00133	0.00117	0.00106		0.00168	0.00166	0.00145	0.00124	0.0011
1000	0.000417037	0.00050781	0.00049845	0.000459314	0.000409199		0.000648938	0.000740136	0.00066145	0.00062845	0.000576594		0.0011	0.00106	0.000979155	0.000831489	0.000759212		0.00127	0.00129	0.00113	0.00094188	0.00083496

## Sheet: Fig.1F
	W/o	W/	W/o	W/						W/o	W/	W/o	W/
Time(s)	810	810	530	530		after aligning the baseline			Time(s)	810	810	530	530
-20	0.00137	0.00315	0.000346478	0.00185					208	0.000124844	5.406e-05	6.34375e-05	3.141e-05
-19.98	0.00137	0.00315	0.000345574	0.00185					208.02	9.5625e-05	7.344e-05	5.35938e-05	3.031e-05
-19.96	0.00136	0.00315	0.000344628	0.00185					208.04	9.98438e-05	5.078e-05	5.20313e-05	4.719e-05
-19.94	0.00136	0.00315	0.000343648	0.00185					208.06	0.000121094	6.594e-05	6.28125e-05	6.406e-05
-19.92	0.00136	0.00315	0.000342644	0.00185					208.08	0.000115	7.406e-05	2.42188e-05	6.531e-05
-19.9	0.00136	0.00315	0.000341624	0.00185					208.1	9.73438e-05	1.5e-05	6.09375e-06	5.63e-06
-19.88	0.00136	0.00314	0.000340599	0.00185					208.12	0.000130469	5.188e-05	4.5e-05	3.875e-05
-19.86	0.00135	0.00314	0.000339576	0.00185					208.14	0.000121875	4.719e-05	8.5625e-05	4.25e-05
-19.84	0.00135	0.00314	0.000338565	0.00185					208.16	0.000129688	2.156e-05	1.75e-05	7.19e-06
-19.82	0.00135	0.00314	0.000337573	0.00185					208.18	0.000128281	4.5e-05	2.5e-05	-1.031e-05
-19.8	0.00135	0.00314	0.000336608	0.00185					208.2	0.000121094	6.828e-05	0.000104375	7.391e-05
-19.78	0.00135	0.00314	0.000335677	0.00185					208.22	0.000111406	8.375e-05	5.875e-05	4e-05
-19.76	0.00135	0.00314	0.000334787	0.00185					208.24	0.000129219	6.625e-05	6.07813e-05	-1.078e-05
-19.74	0.00135	0.00314	0.000333945	0.00185					208.26	0.000128594	0.00011594	5.01563e-05	2.813e-05
-19.72	0.00135	0.00314	0.000333154	0.00185					208.28	0.000114531	0.00012344	9.125e-05	6.391e-05
-19.7	0.00134	0.00314	0.000332419	0.00185					208.3	0.00015125	5.594e-05	7.89063e-05	4.797e-05
-19.68	0.00134	0.00314	0.000331744	0.00185					208.32	0.000152031	0.00011469	9.57813e-05	3.703e-05
-19.66	0.00134	0.00314	0.000331132	0.00185					208.34	0.000123594	0.00013188	8.84375e-05	5.516e-05
-19.64	0.00134	0.00314	0.000330584	0.00185					208.36	0.0001175	5.328e-05	5.39063e-05	7.828e-05
-19.62	0.00134	0.00314	0.000330102	0.00185					208.38	0.000131563	7.938e-05	9.67188e-05	8.469e-05
-19.6	0.00134	0.00314	0.000329685	0.00185					208.4	0.000104063	5.766e-05	0.000120313	4.313e-05
-19.58	0.00134	0.00314	0.000329334	0.00185					208.42	0.000114688	4.688e-05	5.04688e-05	8.109e-05
-19.56	0.00134	0.00314	0.000329047	0.00185					208.44	8.64063e-05	7.797e-05	4.03125e-05	9.516e-05
-19.54	0.00134	0.00314	0.000328821	0.00185					208.46	0.000105313	5.219e-05	7.8125e-05	5.47e-06
-19.52	0.00134	0.00314	0.000328656	0.00185					208.48	0.000101719	4.844e-05	8.14063e-05	7.859e-05
-19.5	0.00134	0.00314	0.000328546	0.00185					208.5	9.51563e-05	7.078e-05	6.21875e-05	9.453e-05
-19.48	0.00134	0.00314	0.000328489	0.00184					208.52	0.000130781	3.328e-05	2.85938e-05	1.578e-05
-19.46	0.00134	0.00314	0.000328481	0.00184					208.54	0.000105781	8.28e-06	5.26563e-05	-2.641e-05
-19.44	0.00135	0.00314	0.000328516	0.00184					208.56	8.625e-05	5.703e-05	5.4375e-05	9.625e-05
-19.42	0.00135	0.00314	0.000328591	0.00184					208.58	0.000108594	9.063e-05	6.26563e-05	5.297e-05
-19.4	0.00135	0.00314	0.000328701	0.00184					208.6	7.73438e-05	6.609e-05	8.59375e-06	-7e-05
-19.38	0.00135	0.00314	0.00032884	0.00184					208.62	7.84375e-05	1.266e-05	2.875e-05	4.031e-05
-19.36	0.00135	0.00314	0.000329004	0.00184					208.64	0.000127812	6.328e-05	9.45313e-05	7.875e-05
-19.34	0.00135	0.00314	0.000329187	0.00184					208.66	0.000121094	0.00010016	5.70313e-05	1.625e-05
-19.32	0.00135	0.00314	0.000329386	0.00184					208.68	0.000115469	7.672e-05	3.5625e-05	-4.812e-05
-19.3	0.00135	0.00314	0.000329596	0.00184					208.7	8.875e-05	3.953e-05	3.6875e-05	3.734e-05
-19.28	0.00135	0.00314	0.000329812	0.00184					208.72	0.000131563	8.5e-05	8.4375e-05	7.266e-05
-19.26	0.00135	0.00314	0.000330031	0.00184					208.74	0.000114844	8.453e-05	7.84375e-05	4.953e-05
-19.24	0.00135	0.00314	0.00033025	0.00184					208.76	9.64063e-05	7.094e-05	3.03125e-05	4.38e-06
-19.22	0.00136	0.00314	0.000330465	0.00184					208.78	0.000105156	0.00011359	6.14063e-05	3.891e-05
-19.2	0.00136	0.00314	0.000330674	0.00184					208.8	0.000111406	0.00010313	0.000111563	8.859e-05
-19.18	0.00136	0.00314	0.000330876	0.00184					208.82	9.98438e-05	2.219e-05	6.10938e-05	4.203e-05
-19.16	0.00136	0.00314	0.000331068	0.00184					208.84	0.000112031	2.078e-05	7.6875e-05	3.359e-05
-19.14	0.00136	0.00314	0.00033125	0.00184					208.86	0.000123594	7.969e-05	8.125e-05	7.953e-05
-19.12	0.00136	0.00314	0.000331422	0.00184					208.88	9.82813e-05	7.594e-05	6.45312e-05	9.719e-05
-19.1	0.00136	0.00314	0.000331584	0.00184					208.9	0.000146875	-4.25e-05	4.625e-05	7.047e-05
-19.08	0.00136	0.00314	0.000331736	0.00184					208.92	0.000117031	2.766e-05	6.90625e-05	7.875e-05
-19.06	0.00136	0.00314	0.000331879	0.00184					208.94	7.04688e-05	6.703e-05	0.000106094	9.109e-05
-19.04	0.00136	0.00314	0.000332016	0.00184					208.96	0.00010125	1.359e-05	4.45313e-05	0.00010469
-19.02	0.00136	0.00314	0.000332147	0.00184					208.98	0.000129688	-2.359e-05	6.67188e-05	0.00010328
-19	0.00137	0.00314	0.000332274	0.00184					209	8.5625e-05	5.609e-05	5.5e-05	5.266e-05
-18.98	0.00137	0.00314	0.000332401	0.00184					209.02	0.000120469	8.5e-05	2.25e-05	3.688e-05
-18.96	0.00137	0.00314	0.000332529	0.00184					209.04	0.000116719	2.313e-05	3.875e-05	4.906e-05
-18.94	0.00137	0.00314	0.000332661	0.00184					209.06	0.000109219	3.234e-05	4.34375e-05	8.031e-05
-18.92	0.00137	0.00314	0.0003328	0.00184					209.08	0.000130469	7.484e-05	4.9375e-05	3.656e-05
-18.9	0.00137	0.00314	0.000332949	0.00184					209.1	8.21875e-05	7.797e-05	7.03125e-05	3.078e-05
-18.88	0.00137	0.00314	0.00033311	0.00184					209.12	0.000117813	3.422e-05	4.90625e-05	7.344e-05
-18.86	0.00137	0.00314	0.000333285	0.00184					209.14	9.60938e-05	2.625e-05	3.75e-05	3.203e-05
-18.84	0.00137	0.00314	0.000333478	0.00184					209.16	9.70313e-05	0.00010641	6.45312e-05	1.922e-05
-18.82	0.00137	0.00314	0.000333689	0.00184					209.18	0.000122969	7.766e-05	4.65625e-05	3.672e-05
-18.8	0.00137	0.00314	0.000333921	0.00184					209.2	0.000107813	3e-05	2.92188e-05	6.359e-05
-18.78	0.00137	0.00314	0.000334175	0.00185					209.22	0.000119375	3.156e-05	7.5e-05	2.953e-05
-18.76	0.00137	0.00314	0.000334453	0.00185					209.24	0.000135313	3.156e-05	6.23438e-05	7.609e-05
-18.74	0.00137	0.00314	0.000334755	0.00185					209.26	0.000125938	6.109e-05	3.71875e-05	4.063e-05
-18.72	0.00137	0.00314	0.000335081	0.00185					209.28	9.45313e-05	5.16e-06	8.09375e-05	2.844e-05
-18.7	0.00137	0.00314	0.000335432	0.00185					209.3	9.70313e-05	1.891e-05	6.85938e-05	7.641e-05
-18.68	0.00137	0.00314	0.000335807	0.00185					209.32	8.79688e-05	7.234e-05	5.51563e-05	5.469e-05
-18.66	0.00137	0.00314	0.000336206	0.00185					209.34	0.000102969	2.391e-05	4.5625e-05	5.875e-05
-18.64	0.00137	0.00314	0.000336626	0.00185					209.36	8.82813e-05	-3.1e-07	6.21875e-05	4.938e-05
-18.62	0.00137	0.00314	0.000337067	0.00185					209.38	8.90625e-05	4.906e-05	6.46875e-05	7.063e-05
-18.6	0.00137	0.00314	0.000337527	0.00185					209.4	0.000135625	8.953e-05	0.0001025	6.719e-05
-18.58	0.00137	0.00314	0.000338003	0.00185					209.42	0.000147656	2.563e-05	4.53125e-05	6.344e-05
-18.56	0.00137	0.00314	0.000338494	0.00185					209.44	9.71875e-05	6.297e-05	-1.5625e-07	8.766e-05
-18.54	0.00138	0.00314	0.000338996	0.00186					209.46	9.03125e-05	7.234e-05	9.85938e-05	6.813e-05
-18.52	0.00138	0.00314	0.000339507	0.00186					209.48	0.000118594	8.266e-05	9.40625e-05	8.44e-06
-18.5	0.00138	0.00314	0.000340023	0.00186					209.5	0.000158906	4.375e-05	1.57813e-05	5.969e-05
-18.48	0.00138	0.00314	0.000340543	0.00186					209.52	0.000115469	0.00011031	6.39062e-05	4.828e-05
-18.46	0.00138	0.00314	0.000341062	0.00186					209.54	0.000101719	7.688e-05	0.000112656	3.781e-05
-18.44	0.00138	0.00314	0.000341577	0.00186					209.56	0.000123438	4.531e-05	7.01563e-05	5.563e-05
-18.42	0.00138	0.00314	0.000342086	0.00186					209.58	0.000154063	6.094e-05	4.26563e-05	4.094e-05
-18.4	0.00138	0.00314	0.000342586	0.00186					209.6	0.000118906	5.969e-05	4.03125e-05	2.516e-05
-18.38	0.00138	0.00314	0.000343073	0.00186					209.62	9.1875e-05	6.109e-05	9.5625e-05	6.297e-05
-18.36	0.00138	0.00314	0.000343546	0.00186					209.64	0.0001325	5.875e-05	4.57813e-05	4.563e-05
-18.34	0.00138	0.00314	0.000344001	0.00186					209.66	0.000120156	3.91e-06	5.01563e-05	3.281e-05
-18.32	0.00138	0.00314	0.000344437	0.00186					209.68	8.29688e-05	2.469e-05	3.1875e-05	7.328e-05
-18.3	0.00138	0.00314	0.000344851	0.00186					209.7	8.70313e-05	4.844e-05	7.26563e-05	7.953e-05
-18.28	0.00138	0.00314	0.000345242	0.00186					209.72	0.000125	5.375e-05	5.64063e-05	4.06e-06
-18.26	0.00138	0.00314	0.000345608	0.00186					209.74	6.54688e-05	4.594e-05	6.82813e-05	6.078e-05
-18.24	0.00138	0.00314	0.000345949	0.00186					209.76	6.15625e-05	3.016e-05	5.82813e-05	9.313e-05
-18.22	0.00138	0.00314	0.000346262	0.00186					209.78	0.000134844	7.172e-05	3.65625e-05	1.656e-05
-18.2	0.00138	0.00314	0.000346548	0.00186					209.8	8.375e-05	5.297e-05	3.70313e-05	-1.187e-05
-18.18	0.00138	0.00314	0.000346807	0.00186					209.82	3.10938e-05	2.844e-05	4.82813e-05	7.484e-05
-18.16	0.00138	0.00314	0.000347038	0.00186					209.84	0.00010375	9.875e-05	9.26563e-05	5.766e-05
-18.14	0.00138	0.00314	0.00034724	0.00186					209.86	8.45313e-05	9.609e-05	3.92188e-05	6.3e-07
-18.12	0.00138	0.00314	0.000347416	0.00186					209.88	6.60938e-05	7.703e-05	2.46875e-05	3.781e-05
-18.1	0.00138	0.00314	0.000347564	0.00186					209.9	8.20313e-05	0.00010531	4e-05	8.719e-05
-18.08	0.00138	0.00314	0.000347687	0.00185					209.92	0.000115625	8.672e-05	8.625e-05	3.344e-05
-18.06	0.00138	0.00314	0.000347783	0.00185					209.94	0.000128281	5.75e-05	5.45313e-05	-2.391e-05
-18.04	0.00138	0.00315	0.000347856	0.00185					209.96	0.000118281	7.859e-05	4.04688e-05	2.234e-05
-18.02	0.00138	0.00315	0.000347904	0.00185					209.98	0.000119688	9.453e-05	6.14063e-05	8.406e-05
-18	0.00138	0.00315	0.00034793	0.00185					210	0.000128438	3.406e-05	8.4375e-05	4.828e-05
-17.98	0.00138	0.00315	0.000347935	0.00185					210.02	0.0001525	3.141e-05	6e-05	5.78e-06
-17.96	0.00138	0.00315	0.00034792	0.00185					210.04	0.000131563	8.453e-05	6.25e-05	1.297e-05
-17.94	0.00138	0.00315	0.000347885	0.00185					210.06	0.000135	5e-05	0.000105313	6.281e-05
-17.92	0.00138	0.00315	0.000347833	0.00185					210.08	0.000128906	5.063e-05	4.71875e-05	7.203e-05
-17.9	0.00139	0.00315	0.000347763	0.00185					210.1	0.000119688	5.188e-05	1.84375e-05	-1.09e-06
-17.88	0.00139	0.00315	0.000347678	0.00185					210.12	0.000118594	5.578e-05	9.92188e-05	5.94e-06
-17.86	0.00139	0.00315	0.000347577	0.00185					210.14	0.000120938	6.844e-05	7.0625e-05	0.00010547
-17.84	0.00139	0.00315	0.000347463	0.00184					210.16	7.0625e-05	6.125e-05	5.6875e-05	9.625e-05
-17.82	0.00139	0.00315	0.000347335	0.00184					210.18	9.39063e-05	3.844e-05	7.90625e-05	3.28e-06
-17.8	0.00139	0.00315	0.000347196	0.00184					210.2	0.000108125	1.594e-05	6.51563e-05	3.922e-05
-17.78	0.00139	0.00315	0.000347045	0.00184					210.22	8.3125e-05	8.547e-05	2.64063e-05	9.688e-05
-17.76	0.00139	0.00315	0.000346883	0.00184					210.24	4.71875e-05	0.00010641	4.82813e-05	7.047e-05
-17.74	0.00139	0.00315	0.000346711	0.00184					210.26	4.89063e-05	7.984e-05	4.51563e-05	-2.922e-05
-17.72	0.00139	0.00315	0.000346531	0.00184					210.28	6.875e-05	5.828e-05	5.59375e-05	3.938e-05
-17.7	0.00139	0.00315	0.000346343	0.00184					210.3	6.53125e-05	7.594e-05	3.65625e-05	7.344e-05
-17.68	0.00139	0.00315	0.000346147	0.00184					210.32	8.25e-05	7.109e-05	6.01563e-05	3.188e-05
-17.66	0.00139	0.00315	0.000345945	0.00184					210.34	6.76563e-05	5.078e-05	4.79688e-05	1.531e-05
-17.64	0.00139	0.00315	0.000345738	0.00184					210.36	5.84375e-05	4.297e-05	1.75e-05	3.828e-05
-17.62	0.00139	0.00315	0.000345527	0.00184					210.38	8.03125e-05	7.516e-05	5.34375e-05	5.391e-05
-17.6	0.00139	0.00315	0.000345314	0.00184					210.4	8.34375e-05	7.641e-05	3.3125e-05	1.594e-05
-17.58	0.00139	0.00315	0.000345099	0.00184					210.42	6.84375e-05	7.469e-05	2.70313e-05	3.641e-05
-17.56	0.00139	0.00315	0.000344884	0.00184					210.44	0.000102188	1.375e-05	5.07813e-05	5.031e-05
-17.54	0.00139	0.00315	0.000344671	0.00184					210.46	0.000107969	4.766e-05	9.375e-05	4.125e-05
-17.52	0.00139	0.00315	0.000344461	0.00184					210.48	0.000119688	2.469e-05	7.0625e-05	5.375e-05
-17.5	0.00139	0.00315	0.000344257	0.00184					210.5	0.000103594	3.91e-06	3.17188e-05	1.344e-05
-17.48	0.00139	0.00315	0.00034406	0.00184					210.52	0.000101094	3.047e-05	9.48438e-05	3.75e-06
-17.46	0.0014	0.00315	0.000343873	0.00184					210.54	0.000142344	-1.6e-07	9.5e-05	9.422e-05
-17.44	0.0014	0.00315	0.000343698	0.00184					210.56	0.000118438	4.719e-05	5.46875e-05	5e-05
-17.42	0.0014	0.00315	0.000343537	0.00184					210.58	9.20313e-05	8.422e-05	7.57813e-05	3.688e-05
-17.4	0.0014	0.00316	0.000343393	0.00184					210.6	8.57813e-05	3.813e-05	7.875e-05	2.516e-05
-17.38	0.0014	0.00316	0.000343267	0.00184					210.62	9.39063e-05	4.578e-05	9.64063e-05	7.297e-05
-17.36	0.0014	0.00316	0.000343163	0.00184					210.64	0.000104844	5.094e-05	3.79688e-05	0.00010516
-17.34	0.0014	0.00316	0.000343083	0.00184					210.66	9.07813e-05	4.219e-05	3.48438e-05	4.156e-05
-17.32	0.0014	0.00316	0.000343029	0.00184					210.68	8.21875e-05	8.969e-05	8.35938e-05	1.906e-05
-17.3	0.0014	0.00316	0.000343003	0.00184					210.7	0.0001025	3.594e-05	5.03125e-05	0.00011266
-17.28	0.0014	0.00316	0.000343008	0.00184					210.72	0.000106563	4.328e-05	-2.1875e-06	6.859e-05
-17.26	0.0014	0.00316	0.000343045	0.00184					210.74	9.70313e-05	3.13e-06	0	3.234e-05
-17.24	0.0014	0.00316	0.000343115	0.00185					210.76	6e-05	4.953e-05	4.98438e-05	6.516e-05
-17.22	0.0014	0.00316	0.000343222	0.00185					210.78	7.65625e-05	4.078e-05	6.65625e-05	6.406e-05
-17.2	0.0014	0.00316	0.000343365	0.00185					210.8	9.98438e-05	5.547e-05	3.46875e-05	8.719e-05
-17.18	0.0014	0.00316	0.000343546	0.00185					210.82	5.45313e-05	2.719e-05	-2.32813e-05	3.734e-05
-17.16	0.0014	0.00316	0.000343765	0.00185					210.84	8.57813e-05	2.344e-05	3.75e-05	3.719e-05
-17.14	0.0014	0.00316	0.000344022	0.00185					210.86	9.51563e-05	5.344e-05	7.59375e-05	4.844e-05
-17.12	0.0014	0.00316	0.000344318	0.00185					210.88	0.000112969	5.688e-05	1.17187e-05	2.109e-05
-17.1	0.0014	0.00316	0.000344651	0.00185					210.9	0.0001075	-7.97e-06	6.67188e-05	5.391e-05
-17.08	0.00141	0.00316	0.000345021	0.00185					210.92	8.32813e-05	1.547e-05	8.39063e-05	3.281e-05
-17.06	0.00141	0.00316	0.000345427	0.00185					210.94	7.20313e-05	6.578e-05	4.28125e-05	-6.2e-07
-17.04	0.00141	0.00316	0.000345866	0.00185					210.96	9.78125e-05	1.813e-05	5.35938e-05	3.703e-05
-17.02	0.00141	0.00316	0.000346337	0.00185					210.98	8.57813e-05	1.672e-05	9.35938e-05	2.453e-05
-17	0.00141	0.00316	0.000346837	0.00186					211	9.60938e-05	5.547e-05	8.53125e-05	3.375e-05
-16.98	0.00141	0.00316	0.000347363	0.00186					211.02	8.25e-05	4.375e-05	1.20312e-05	7.078e-05
-16.96	0.00141	0.00316	0.000347913	0.00186					211.04	0.000119375	-1.41e-06	6e-05	4.813e-05
-16.94	0.00141	0.00316	0.000348483	0.00186					211.06	9.9375e-05	5.734e-05	7.60938e-05	7.109e-05
-16.92	0.00141	0.00316	0.000349069	0.00186					211.08	8.65625e-05	6.469e-05	3.54688e-05	7.656e-05
-16.9	0.00141	0.00316	0.000349667	0.00186					211.1	7.875e-05	3.797e-05	2.71875e-05	4.344e-05
-16.88	0.00141	0.00316	0.000350274	0.00186					211.12	9.875e-05	6.844e-05	0.00010625	7.484e-05
-16.86	0.00141	0.00316	0.000350885	0.00186					211.14	0.000112813	6.719e-05	5.40625e-05	9.594e-05
-16.84	0.00141	0.00316	0.000351497	0.00186					211.16	4.60938e-05	5.969e-05	-3.4375e-06	6.719e-05
-16.82	0.00141	0.00316	0.000352105	0.00186					211.18	0.000113594	4.594e-05	6.25e-06	4.078e-05
-16.8	0.00141	0.00316	0.000352704	0.00186					211.2	0.000156094	2.344e-05	5.65625e-05	9.047e-05
-16.78	0.00141	0.00316	0.000353291	0.00186					211.22	0.000115	3.313e-05	4.07813e-05	7.516e-05
-16.76	0.00141	0.00316	0.000353863	0.00186					211.24	0.000105313	7.172e-05	2.26563e-05	6.25e-05
-16.74	0.00141	0.00316	0.000354414	0.00186					211.26	0.000127031	1.859e-05	4.5625e-05	6.813e-05
-16.72	0.00141	0.00316	0.000354941	0.00186					211.28	0.000135781	-5.31e-06	5.60938e-05	3e-05
-16.7	0.00141	0.00316	0.000355442	0.00186					211.3	0.000121719	6.969e-05	2.21875e-05	6.484e-05
-16.68	0.00141	0.00316	0.000355913	0.00186					211.32	0.000101875	0.00010125	6.25e-05	5.063e-05
-16.66	0.00141	0.00316	0.000356351	0.00186					211.34	0.000101563	1.406e-05	8.64063e-05	-1.72e-06
-16.64	0.00141	0.00316	0.000356754	0.00186					211.36	0.000109844	1.5e-05	2.46875e-05	5.719e-05
-16.62	0.00141	0.00316	0.000357121	0.00186					211.38	0.000108438	0.00010781	1.8125e-05	6.953e-05
-16.6	0.00141	0.00315	0.000357448	0.00186					211.4	9.40625e-05	9.5e-05	7.75e-05	-2.891e-05
-16.58	0.00141	0.00315	0.000357736	0.00186					211.42	7.84375e-05	3.266e-05	0.000101406	6.406e-05
-16.56	0.00141	0.00315	0.000357983	0.00186					211.44	0.000115625	4.344e-05	6.57813e-05	4.844e-05
-16.54	0.00141	0.00315	0.000358188	0.00186					211.46	5.39063e-05	9.984e-05	7.32813e-05	-7.97e-06
-16.52	0.00141	0.00315	0.000358352	0.00186					211.48	6.82813e-05	8.547e-05	0.000100156	4.53e-06
-16.5	0.00141	0.00315	0.000358475	0.00186					211.5	7.21875e-05	2.563e-05	6.32813e-05	5.469e-05
-16.48	0.00141	0.00315	0.000358558	0.00186					211.52	7.76563e-05	6.734e-05	4.53125e-05	8.563e-05
-16.46	0.00141	0.00315	0.000358601	0.00186					211.54	6.21875e-05	7.547e-05	1.95313e-05	2.609e-05
-16.44	0.00141	0.00315	0.000358606	0.00186					211.56	6.40625e-05	3.141e-05	0.000101563	2.703e-05
-16.42	0.00141	0.00315	0.000358575	0.00186					211.58	8.32813e-05	2.906e-05	3.64063e-05	8.625e-05
-16.4	0.00141	0.00315	0.000358508	0.00185					211.6	8.92188e-05	7.906e-05	2.6875e-05	7.672e-05
-16.38	0.00141	0.00315	0.000358409	0.00185					211.62	8.42188e-05	5.797e-05	8.375e-05	4.422e-05
-16.36	0.00141	0.00315	0.000358278	0.00185					211.64	5.64063e-05	4.844e-05	7.71875e-05	3.313e-05
-16.34	0.00141	0.00315	0.00035812	0.00185					211.66	8.9375e-05	5.109e-05	1.17187e-05	4.922e-05
-16.32	0.00141	0.00315	0.000357935	0.00185					211.68	9.60938e-05	6.391e-05	6.5625e-06	7.828e-05
-16.3	0.00141	0.00315	0.000357727	0.00185					211.7	0.000106875	3.688e-05	7.4375e-05	5.406e-05
-16.28	0.00141	0.00315	0.000357498	0.00185					211.72	0.00010875	1.406e-05	2.4375e-05	3.359e-05
-16.26	0.00141	0.00315	0.000357251	0.00185					211.74	0.000119219	0.00010828	3.09375e-05	4.922e-05
-16.24	0.00141	0.00315	0.000356987	0.00185					211.76	0.000112656	8.516e-05	6.23438e-05	0.00010094
-16.22	0.00141	0.00315	0.000356711	0.00185					211.78	0.000102813	7.219e-05	9.0625e-05	4.578e-05
-16.2	0.00141	0.00315	0.000356423	0.00185					211.8	0.000158281	4.063e-05	5.82813e-05	-4.69e-06
-16.18	0.00141	0.00315	0.000356127	0.00185					211.82	0.000127031	5.859e-05	6.35938e-05	2.438e-05
-16.16	0.00141	0.00315	0.000355825	0.00185					211.84	8.89063e-05	9.063e-05	7.59375e-05	9.219e-05
-16.14	0.00141	0.00315	0.000355518	0.00184					211.86	0.000105938	7.563e-05	0.00010125	6.469e-05
-16.12	0.00141	0.00315	0.000355209	0.00184					211.88	8.65625e-05	7.453e-05	2.59375e-05	9.4e-07
-16.1	0.00141	0.00315	0.000354899	0.00184					211.9	8.03125e-05	7.625e-05	9.25e-05	4.172e-05
-16.08	0.00141	0.00315	0.000354592	0.00184					211.92	8.01563e-05	0.00010531	9.96875e-05	6.906e-05
-16.06	0.00141	0.00315	0.000354287	0.00184					211.94	3.95313e-05	9.094e-05	2.95313e-05	4.203e-05
-16.04	0.00141	0.00315	0.000353987	0.00184					211.96	5.4375e-05	4.719e-05	6.75e-05	2.75e-05
-16.02	0.00141	0.00315	0.000353692	0.00184					211.98	9.98438e-05	7.219e-05	7.5e-05	6.781e-05
-16	0.00141	0.00315	0.000353405	0.00184					212	4.48438e-05	2.531e-05	2.84375e-05	9.719e-05
-15.98	0.00141	0.00315	0.000353127	0.00184					212.02	6.875e-06	2.75e-05	4.4375e-05	3.266e-05
-15.96	0.00142	0.00315	0.000352859	0.00184					212.04	7.35938e-05	6.047e-05	5.09375e-05	-1.031e-05
-15.94	0.00142	0.00315	0.000352601	0.00184					212.06	6.70313e-05	1.359e-05	7.23438e-05	9.859e-05
-15.92	0.00142	0.00316	0.000352355	0.00184					212.08	2.9375e-05	5.219e-05	2.1875e-05	6.344e-05
-15.9	0.00142	0.00316	0.000352122	0.00184					212.1	4.01563e-05	3.359e-05	7.8125e-06	1.031e-05
-15.88	0.00142	0.00316	0.000351903	0.00184					212.12	0.0001	6.516e-05	8.15625e-05	4.266e-05
-15.86	0.00142	0.00316	0.000351699	0.00184					212.14	0.000109531	2.594e-05	6.875e-05	8.391e-05
-15.84	0.00142	0.00316	0.000351511	0.00184					212.16	4.92188e-05	5.094e-05	2.73438e-05	1.188e-05
-15.82	0.00142	0.00316	0.000351341	0.00184					212.18	9.76563e-05	4.203e-05	4.84375e-05	3.516e-05
-15.8	0.00142	0.00316	0.000351188	0.00184					212.2	0.000102969	7.766e-05	5.39063e-05	7.844e-05
-15.78	0.00142	0.00316	0.000351054	0.00184					212.22	8.20313e-05	9.547e-05	5.51563e-05	6.125e-05
-15.76	0.00142	0.00316	0.000350941	0.00184					212.24	0.000106094	3.203e-05	5.32813e-05	1.703e-05
-15.74	0.00142	0.00316	0.000350848	0.00184					212.26	0.000148438	7.109e-05	7.64063e-05	6.891e-05
-15.72	0.00142	0.00316	0.000350779	0.00184					212.28	0.000115313	0.00012297	8.71875e-05	5.781e-05
-15.7	0.00142	0.00316	0.000350732	0.00184					212.3	8.42188e-05	1.938e-05	6.32813e-05	7.75e-05
-15.68	0.00142	0.00316	0.000350711	0.00184					212.32	0.000134688	7.5e-06	4.73438e-05	4.656e-05
-15.66	0.00142	0.00316	0.000350715	0.00184					212.34	0.000132656	5.188e-05	7.4375e-05	6.5e-05
-15.64	0.00142	0.00316	0.000350746	0.00184					212.36	9.67188e-05	4.828e-05	4.17188e-05	9.391e-05
-15.62	0.00142	0.00316	0.000350805	0.00184					212.38	6.1875e-05	-1.75e-05	5.3125e-05	3.656e-05
-15.6	0.00142	0.00316	0.000350892	0.00185					212.4	0.000109688	2.391e-05	4.65625e-05	5.391e-05
-15.58	0.00142	0.00316	0.000351008	0.00185					212.42	6.71875e-05	2.563e-05	4.09375e-05	7.313e-05
-15.56	0.00142	0.00316	0.000351155	0.00185					212.44	3e-05	1.6e-07	6.01563e-05	7.34e-06
-15.54	0.00142	0.00316	0.000351332	0.00185					212.46	7.67188e-05	2.156e-05	-8.28125e-06	6.328e-05
-15.52	0.00143	0.00316	0.00035154	0.00185					212.48	5.21875e-05	3.75e-05	4.73438e-05	5.391e-05
-15.5	0.00143	0.00316	0.000351779	0.00185					212.5	6.89063e-05	4.688e-05	3e-05	3.172e-05
-15.48	0.00143	0.00316	0.000352048	0.00185					212.52	7.625e-05	-3.734e-05	5.625e-06	4.703e-05
-15.46	0.00143	0.00316	0.000352348	0.00185					212.54	0.000105	5.47e-06	4.09375e-05	1.453e-05
-15.44	0.00143	0.00316	0.000352678	0.00185					212.56	6.15625e-05	8.922e-05	8.01563e-05	2.469e-05
-15.42	0.00143	0.00316	0.000353037	0.00185					212.58	4.76563e-05	4.438e-05	3.15625e-05	2.531e-05
-15.4	0.00143	0.00316	0.000353424	0.00185					212.6	9.95313e-05	2.891e-05	3.32813e-05	3.313e-05
-15.38	0.00143	0.00316	0.000353837	0.00185					212.62	8.39063e-05	6e-05	2.23438e-05	5e-06
-15.36	0.00143	0.00316	0.000354275	0.00186					212.64	7.76563e-05	9.328e-05	4.73438e-05	2.984e-05
-15.34	0.00143	0.00316	0.000354736	0.00186					212.66	0.000102813	4.953e-05	5.71875e-05	7.125e-05
-15.32	0.00143	0.00316	0.000355217	0.00186					212.68	0.000118906	4.141e-05	2.14063e-05	4.828e-05
-15.3	0.00143	0.00316	0.000355716	0.00186					212.7	0.00012625	6.922e-05	3.6875e-05	5.75e-05
-15.28	0.00143	0.00316	0.000356231	0.00186					212.72	8.79688e-05	0.00010344	6.60938e-05	6.703e-05
-15.26	0.00143	0.00316	0.000356758	0.00186					212.74	8.04688e-05	3.125e-05	4.60938e-05	5.266e-05
-15.24	0.00143	0.00316	0.000357294	0.00186					212.76	9.8125e-05	2.938e-05	7.48437e-05	7.797e-05
-15.22	0.00143	0.00316	0.000357835	0.00186					212.78	9.8125e-05	5.547e-05	6.82813e-05	6.469e-05
-15.2	0.00143	0.00316	0.000358379	0.00186					212.8	7.54688e-05	5.359e-05	4.15625e-05	7.406e-05
-15.18	0.00143	0.00316	0.000358922	0.00186					212.82	5.53125e-05	6.25e-06	6.84375e-05	6.641e-05
-15.16	0.00143	0.00316	0.000359459	0.00186					212.84	0.000100781	6.72e-06	7.34375e-05	6.922e-05
-15.14	0.00143	0.00316	0.000359988	0.00186					212.86	9.70313e-05	-5.94e-06	4.75e-05	4.75e-05
-15.12	0.00143	0.00316	0.000360504	0.00186					212.88	7.95313e-05	5.094e-05	2.03125e-05	6.063e-05
-15.1	0.00143	0.00316	0.000361004	0.00186					212.9	8.10938e-05	1.594e-05	9.42188e-05	5.156e-05
-15.08	0.00143	0.00316	0.000361484	0.00186					212.92	8.10938e-05	-7.5e-06	8.79688e-05	5.703e-05
-15.06	0.00143	0.00316	0.00036194	0.00186					212.94	8.1875e-05	3.672e-05	2.32813e-05	5.188e-05
-15.04	0.00143	0.00316	0.00036237	0.00186					212.96	7.48437e-05	1.906e-05	2.96875e-05	2.531e-05
-15.02	0.00143	0.00316	0.00036277	0.00186					212.98	6.76563e-05	3.688e-05	5.76563e-05	3.922e-05
-15	0.00143	0.00316	0.000363138	0.00186					213	0.000112344	4.813e-05	7.20313e-05	4.844e-05
-14.98	0.00143	0.00316	0.00036347	0.00186					213.02	9.6875e-05	0.00011297	2.29687e-05	1.797e-05
-14.96	0.00143	0.00316	0.000363764	0.00186					213.04	8.70313e-05	7.016e-05	-2.25e-05	-2.81e-06
-14.94	0.00143	0.00316	0.00036402	0.00186					213.06	0.000109063	-1.6e-07	7.65625e-05	2.563e-05
-14.92	0.00143	0.00316	0.000364234	0.00186					213.08	9.23438e-05	9.609e-05	8.04688e-05	3.531e-05
-14.9	0.00143	0.00316	0.000364405	0.00186					213.1	7.60938e-05	0.00012844	3.75e-05	7.03e-06
-14.88	0.00143	0.00316	0.000364534	0.00186					213.12	5.70313e-05	6.219e-05	1.45313e-05	3.406e-05
-14.86	0.00143	0.00316	0.000364618	0.00185					213.14	9.07813e-05	6.031e-05	6.25e-05	4.047e-05
-14.84	0.00143	0.00316	0.000364659	0.00185					213.16	0.000101875	0.00013188	8.04688e-05	6.063e-05
-14.82	0.00143	0.00316	0.000364657	0.00185					213.18	7.46875e-05	0.00012391	6.25e-07	2.359e-05
-14.8	0.00143	0.00316	0.000364612	0.00185					213.2	6.9375e-05	1.016e-05	2.25e-05	5.906e-05
-14.78	0.00143	0.00316	0.000364525	0.00185					213.22	8.39063e-05	4.5e-05	0.000117656	7.906e-05
-14.76	0.00143	0.00316	0.000364398	0.00185					213.24	0.000121875	0.00012578	6.14063e-05	8.344e-05
-14.74	0.00143	0.00316	0.000364232	0.00185					213.26	6.70313e-05	-3.28e-06	3.10938e-05	2.875e-05
-14.72	0.00143	0.00316	0.00036403	0.00185					213.28	5.79688e-05	1.125e-05	6.53125e-05	8.75e-05
-14.7	0.00143	0.00316	0.000363794	0.00185					213.3	0.000105313	7.344e-05	9.23438e-05	8.484e-05
-14.68	0.00143	0.00316	0.000363527	0.00185					213.32	8.98438e-05	3.953e-05	4.03125e-05	4.719e-05
-14.66	0.00143	0.00316	0.000363232	0.00185					213.34	4.39063e-05	5.63e-06	2.875e-05	6.281e-05
-14.64	0.00143	0.00316	0.000362912	0.00185					213.36	7.53125e-05	5.844e-05	8e-05	6.75e-05
-14.62	0.00143	0.00316	0.000362569	0.00184					213.38	0.000121875	3.938e-05	6.04688e-05	0.00011344
-14.6	0.00143	0.00316	0.000362208	0.00184					213.4	8.03125e-05	3.016e-05	4.5625e-05	3.75e-05
-14.58	0.00143	0.00316	0.000361831	0.00184					213.42	7.78125e-05	8.813e-05	6.09375e-05	1.25e-05
-14.56	0.00143	0.00316	0.000361443	0.00184					213.44	7.40625e-05	8.203e-05	5.26563e-05	9.719e-05
-14.54	0.00143	0.00316	0.000361047	0.00184					213.46	8.71875e-05	7.047e-05	8.90625e-06	8.438e-05
-14.52	0.00143	0.00316	0.000360646	0.00184					213.48	0.000105469	5.922e-05	2.64063e-05	-2.187e-05
-14.5	0.00143	0.00316	0.000360243	0.00184					213.5	5.75e-05	5.688e-05	5.70313e-05	-2.453e-05
-14.48	0.00143	0.00316	0.000359843	0.00184					213.52	0.000100938	9.234e-05	6.14063e-05	0.00011906
-14.46	0.00143	0.00316	0.000359447	0.00184					213.54	7.625e-05	9.953e-05	4.10938e-05	5.313e-05
-14.44	0.00143	0.00316	0.00035906	0.00184					213.56	7.84375e-05	4.656e-05	5.07813e-05	-4.547e-05
-14.42	0.00143	0.00316	0.000358684	0.00184					213.58	8.65625e-05	4.703e-05	0.000106719	2.672e-05
-14.4	0.00143	0.00316	0.000358321	0.00184					213.6	8.65625e-05	6.297e-05	5.625e-05	7.25e-05
-14.38	0.00143	0.00316	0.000357974	0.00184					213.62	8.48438e-05	7.516e-05	3.125e-05	1.734e-05
-14.36	0.00143	0.00316	0.000357646	0.00184					213.64	3.75e-05	1.859e-05	9.625e-05	3.28e-06
-14.34	0.00144	0.00316	0.000357338	0.00184					213.66	4.76563e-05	4.406e-05	9.54688e-05	6.969e-05
-14.32	0.00144	0.00316	0.000357052	0.00184					213.68	7.35938e-05	3.328e-05	2.40625e-05	7.672e-05
-14.3	0.00144	0.00316	0.000356789	0.00184					213.7	1.89063e-05	5.984e-05	5.92188e-05	5.188e-05
-14.28	0.00144	0.00316	0.000356551	0.00184					213.72	5.60938e-05	6.641e-05	6.89063e-05	3.531e-05
-14.26	0.00144	0.00316	0.000356338	0.00184					213.74	6.01563e-05	2.609e-05	7.3125e-05	5.484e-05
-14.24	0.00144	0.00316	0.000356152	0.00184					213.76	0.000101406	3.984e-05	4.04688e-05	5.719e-05
-14.22	0.00144	0.00316	0.000355993	0.00184					213.78	5.23438e-05	1.984e-05	2.29687e-05	5.531e-05
-14.2	0.00144	0.00316	0.000355861	0.00184					213.8	8.92188e-05	7.03e-06	2.48438e-05	6.609e-05
-14.18	0.00144	0.00316	0.000355756	0.00184					213.82	0.000109688	9.06e-06	6.48438e-05	6.422e-05
-14.16	0.00144	0.00316	0.000355679	0.00184					213.84	9.28125e-05	5.969e-05	3.875e-05	5.016e-05
-14.14	0.00144	0.00316	0.000355628	0.00184					213.86	6.5e-05	6.641e-05	6.40625e-06	6.531e-05
-14.12	0.00144	0.00316	0.000355604	0.00184					213.88	8.96875e-05	2.859e-05	6.28125e-05	8.391e-05
-14.1	0.00144	0.00316	0.000355605	0.00184					213.9	8e-05	3.734e-05	8.48438e-05	5.453e-05
-14.08	0.00144	0.00316	0.000355632	0.00184					213.92	7.09375e-05	4.453e-05	2.09375e-05	5.719e-05
-14.06	0.00144	0.00316	0.000355684	0.00184					213.94	0.000107656	5.063e-05	9.0625e-06	6.781e-05
-14.04	0.00144	0.00316	0.00035576	0.00184					213.96	8.09375e-05	6.234e-05	7.20313e-05	5.563e-05
-14.02	0.00144	0.00317	0.000355858	0.00184					213.98	8.6875e-05	4.359e-05	7.29688e-05	3.984e-05
-14	0.00144	0.00317	0.000355979	0.00184					214	7.98438e-05	5.891e-05	1.625e-05	1.969e-05
-13.98	0.00144	0.00317	0.00035612	0.00185					214.02	6.625e-05	3.859e-05	4.875e-05	5.578e-05
-13.96	0.00144	0.00317	0.000356282	0.00185					214.04	9.5e-05	1.984e-05	9.15625e-05	4.266e-05
-13.94	0.00144	0.00317	0.000356463	0.00185					214.06	6.5e-05	-1.359e-05	9.90625e-05	6.41e-06
-13.92	0.00144	0.00317	0.000356663	0.00185					214.08	5.625e-05	6.938e-05	4.32813e-05	-1.156e-05
-13.9	0.00144	0.00317	0.000356879	0.00185					214.1	6.67188e-05	4.297e-05	3.98438e-05	1.547e-05
-13.88	0.00144	0.00317	0.000357113	0.00185					214.12	7.64063e-05	-3.094e-05	7.96875e-05	4.094e-05
-13.86	0.00144	0.00317	0.000357362	0.00185					214.14	5.64063e-05	5.047e-05	3.21875e-05	2.313e-05
-13.84	0.00144	0.00317	0.000357626	0.00185					214.16	4.89063e-05	4.891e-05	5.5e-05	7.81e-06
-13.82	0.00144	0.00317	0.000357904	0.00185					214.18	7.875e-05	-1.016e-05	4.59375e-05	3.266e-05
-13.8	0.00144	0.00317	0.000358196	0.00185					214.2	9.09375e-05	1.281e-05	2.85938e-05	-3.891e-05
-13.78	0.00144	0.00316	0.0003585	0.00185					214.22	1.67187e-05	2.094e-05	4.96875e-05	2.344e-05
-13.76	0.00144	0.00316	0.000358817	0.00185					214.24	4e-05	4.547e-05	1.15625e-05	8.563e-05
-13.74	0.00144	0.00316	0.000359145	0.00185					214.26	9.96875e-05	4.469e-05	3.14063e-05	3.031e-05
-13.72	0.00144	0.00316	0.000359483	0.00185					214.28	7.875e-05	5.969e-05	1.79687e-05	5.047e-05
-13.7	0.00144	0.00316	0.000359832	0.00186					214.3	7.25e-05	6.156e-05	3.32813e-05	5.891e-05
-13.68	0.00144	0.00316	0.000360189	0.00186					214.32	8.375e-05	6.25e-06	3.48438e-05	0.00011125
-13.66	0.00144	0.00316	0.000360556	0.00186					214.34	0.000112656	5.063e-05	6.65625e-05	7.453e-05
-13.64	0.00144	0.00316	0.00036093	0.00186					214.36	0.000100469	2.688e-05	9.39063e-05	0.00010031
-13.62	0.00144	0.00316	0.000361312	0.00186					214.38	4.42188e-05	3.813e-05	3.1875e-05	8.672e-05
-13.6	0.00144	0.00316	0.0003617	0.00186					214.4	8.04688e-05	4.703e-05	6.15625e-05	0.00010391
-13.58	0.00144	0.00316	0.000362093	0.00186					214.42	0.000120938	1.266e-05	0.000105313	7.984e-05
-13.56	0.00144	0.00316	0.000362491	0.00186					214.44	7.89063e-05	7.234e-05	7.96875e-05	3.969e-05
-13.54	0.00144	0.00316	0.000362893	0.00186					214.46	8.25e-05	4.016e-05	4.45313e-05	4.047e-05
-13.52	0.00144	0.00316	0.000363297	0.00186					214.48	9.54688e-05	3.906e-05	8.71875e-05	8.578e-05
-13.5	0.00144	0.00316	0.000363701	0.00186					214.5	8.60938e-05	5.844e-05	4.29688e-05	7.891e-05
-13.48	0.00144	0.00316	0.000364106	0.00186					214.52	9.6875e-05	2.531e-05	5.85938e-05	2.5e-06
-13.46	0.00144	0.00316	0.00036451	0.00186					214.54	7.09375e-05	2.391e-05	4.51563e-05	-3.75e-06
-13.44	0.00144	0.00316	0.00036491	0.00186					214.56	9.23438e-05	5.344e-05	3.59375e-05	5.172e-05
-13.42	0.00144	0.00316	0.000365306	0.00186					214.58	7.48437e-05	9.75e-05	1.89063e-05	2.984e-05
-13.4	0.00144	0.00316	0.000365696	0.00186					214.6	4.34375e-05	1.359e-05	1.25e-06	2.031e-05
-13.38	0.00144	0.00316	0.000366078	0.00186					214.62	2.6875e-05	4.7e-07	3.0625e-05	1.453e-05
-13.36	0.00144	0.00316	0.00036645	0.00186					214.64	0.000102969	0.00010141	4.59375e-05	2.422e-05
-13.34	0.00144	0.00316	0.000366811	0.00186					214.66	7.95313e-05	7e-05	7.8125e-07	4.375e-05
-13.32	0.00144	0.00316	0.000367159	0.00186					214.68	2.375e-05	4.656e-05	-1.25e-06	-3.59e-06
-13.3	0.00144	0.00316	0.000367491	0.00186					214.7	6.375e-05	3.844e-05	7.23438e-05	-3.44e-06
-13.28	0.00144	0.00316	0.000367807	0.00186					214.72	6.82813e-05	8.688e-05	7.65625e-06	0.00011078
-13.26	0.00144	0.00316	0.000368104	0.00186					214.74	0.000116875	8.078e-05	2.17188e-05	2.641e-05
-13.24	0.00144	0.00316	0.00036838	0.00186					214.76	4.82813e-05	5e-06	9.17188e-05	-3.75e-06
-13.22	0.00144	0.00316	0.000368634	0.00185					214.78	5.8125e-05	5.828e-05	7.1875e-05	6.875e-05
-13.2	0.00144	0.00316	0.000368863	0.00185					214.8	8.20313e-05	0.0001125	3.90625e-05	0.00010188
-13.18	0.00144	0.00316	0.000369067	0.00185					214.82	9.20313e-05	5.969e-05	3.375e-05	3.75e-05
-13.16	0.00144	0.00316	0.000369243	0.00185					214.84	5.95313e-05	6.375e-05	8.64063e-05	6.219e-05
-13.14	0.00144	0.00316	0.00036939	0.00185					214.86	7.76563e-05	4.859e-05	7.875e-05	5.438e-05
-13.12	0.00144	0.00316	0.000369507	0.00185					214.88	0.000141094	8.266e-05	8.35938e-05	7.219e-05
-13.1	0.00144	0.00316	0.000369593	0.00185					214.9	0.000116719	6.25e-05	8.54688e-05	5.609e-05
-13.08	0.00144	0.00316	0.000369646	0.00185					214.92	6.35938e-05	1.781e-05	5.875e-05	6.531e-05
-13.06	0.00144	0.00316	0.000369667	0.00185					214.94	6.15625e-05	0.00010219	3.42188e-05	9.359e-05
-13.04	0.00144	0.00316	0.000369654	0.00185					214.96	0.000102344	7.422e-05	7.03125e-05	8.484e-05
-13.02	0.00144	0.00316	0.000369608	0.00185					214.98	9.375e-05	3.953e-05	6.625e-05	8.28e-06
-13	0.00144	0.00316	0.000369528	0.00185					215	9.53125e-05	9.641e-05	1.76562e-05	8.28e-06
-12.98	0.00144	0.00316	0.000369415	0.00185					215.02	5.9375e-05	0.00011281	3.79688e-05	0.00010563
-12.96	0.00144	0.00316	0.000369269	0.00185					215.04	8.01563e-05	5.156e-05	3.1875e-05	4.938e-05
-12.94	0.00144	0.00316	0.000369091	0.00185					215.06	8.4375e-05	3.734e-05	2.40625e-05	7.03e-06
-12.92	0.00144	0.00316	0.000368881	0.00184					215.08	4.35938e-05	7.172e-05	1.39063e-05	6.734e-05
-12.9	0.00145	0.00316	0.000368642	0.00184					215.1	7.35938e-05	6.484e-05	1.35938e-05	0.00010984
-12.88	0.00145	0.00316	0.000368374	0.00184					215.12	6.375e-05	3.891e-05	6.01563e-05	-1.56e-06
-12.86	0.00145	0.00316	0.000368079	0.00184					215.14	1.0625e-05	4.891e-05	5.85938e-05	2.5e-05
-12.84	0.00145	0.00316	0.00036776	0.00184					215.16	4.10938e-05	7.547e-05	-1.4375e-05	9.641e-05
-12.82	0.00145	0.00316	0.000367419	0.00184					215.18	7.28125e-05	5.875e-05	1.46875e-05	2.797e-05
-12.8	0.00145	0.00316	0.000367057	0.00184					215.2	3.89063e-05	3.484e-05	6.21875e-05	3.375e-05
-12.78	0.00145	0.00316	0.000366679	0.00184					215.22	2.48438e-05	5.688e-05	5.39063e-05	8.156e-05
-12.76	0.00145	0.00316	0.000366286	0.00184					215.24	6.9375e-05	5.328e-05	1.85938e-05	5.953e-05
-12.74	0.00145	0.00316	0.000365882	0.00184					215.26	9.5625e-05	4.031e-05	5.375e-05	1.094e-05
-12.72	0.00145	0.00316	0.000365469	0.00184					215.28	6.90625e-05	4.438e-05	8.64063e-05	6.484e-05
-12.7	0.00145	0.00316	0.000365052	0.00184					215.3	4.4375e-05	2.781e-05	6.10938e-05	6.125e-05
-12.68	0.00145	0.00316	0.000364632	0.00184					215.32	8.82813e-05	4.469e-05	5.26563e-05	5.5e-05
-12.66	0.00145	0.00316	0.000364214	0.00184					215.34	7e-05	6.688e-05	7.29688e-05	6.063e-05
-12.64	0.00145	0.00316	0.000363801	0.00184					215.36	9.48438e-05	3.75e-05	9.70313e-05	4.047e-05
-12.62	0.00145	0.00316	0.000363397	0.00184					215.38	7.46875e-05	5e-05	7.01563e-05	6.125e-05
-12.6	0.00145	0.00316	0.000363003	0.00184					215.4	8.28125e-05	9.4e-07	1.54688e-05	8.234e-05
-12.58	0.00145	0.00317	0.000362625	0.00184					215.42	0.000116719	2.719e-05	0.000112656	3.422e-05
-12.56	0.00145	0.00317	0.000362264	0.00184					215.44	0.000110469	5.234e-05	0.000106094	5.219e-05
-12.54	0.00145	0.00317	0.000361925	0.00184					215.46	7.9375e-05	3.094e-05	2.57812e-05	6.219e-05
-12.52	0.00145	0.00317	0.000361609	0.00184					215.48	6.20313e-05	4.406e-05	6.375e-05	6.906e-05
-12.5	0.00145	0.00317	0.000361319	0.00184					215.5	8.76563e-05	4.719e-05	0.000107656	4.969e-05
-12.48	0.00145	0.00317	0.000361058	0.00184					215.52	8.98438e-05	2.484e-05	1.21875e-05	6.656e-05
-12.46	0.00145	0.00317	0.000360828	0.00184					215.54	2.59375e-05	5.813e-05	1.09375e-05	8.594e-05
-12.44	0.00145	0.00317	0.000360632	0.00184					215.56	7.5e-05	3.578e-05	5.23438e-05	4.344e-05
-12.42	0.00145	0.00317	0.000360469	0.00184					215.58	8.125e-05	3.578e-05	8.73438e-05	1.09e-06
-12.4	0.00145	0.00317	0.000360343	0.00184					215.6	6.48438e-05	4.7e-07	-3.40625e-05	4.938e-05
-12.38	0.00145	0.00317	0.000360254	0.00185					215.62	6.92187e-05	4.234e-05	7.8125e-07	6.953e-05
-12.36	0.00145	0.00317	0.000360203	0.00185					215.64	6.53125e-05	8.219e-05	9.59375e-05	1.203e-05
-12.34	0.00145	0.00317	0.000360191	0.00185					215.66	4.17188e-05	7.19e-06	1.6875e-05	1.469e-05
-12.32	0.00145	0.00317	0.000360217	0.00185					215.68	4.5e-05	-3.078e-05	-5.46875e-06	3.875e-05
-12.3	0.00145	0.00317	0.000360282	0.00185					215.7	5.45313e-05	5.969e-05	1.90625e-05	9.06e-06
-12.28	0.00145	0.00317	0.000360386	0.00185					215.72	6.39062e-05	7.547e-05	6.65625e-05	4.22e-06
-12.26	0.00145	0.00317	0.000360527	0.00185					215.74	3.96875e-05	2.781e-05	2.03125e-05	1e-05
-12.24	0.00145	0.00317	0.000360705	0.00185					215.76	6.1875e-05	1.594e-05	2.8125e-06	1.344e-05
-12.22	0.00145	0.00317	0.000360918	0.00185					215.78	8.90625e-05	5.328e-05	4.20313e-05	1.641e-05
-12.2	0.00145	0.00317	0.000361166	0.00185					215.8	7.95313e-05	5.828e-05	4.85938e-05	1.094e-05
-12.18	0.00145	0.00317	0.000361446	0.00185					215.82	9.96875e-05	-5.78e-06	6.40625e-05	5.672e-05
-12.16	0.00145	0.00317	0.000361756	0.00185					215.84	3e-05	2.641e-05	0.000100938	5.344e-05
-12.14	0.00145	0.00317	0.000362095	0.00185					215.86	7.03125e-05	3.047e-05	8.28125e-05	6.578e-05
-12.12	0.00145	0.00317	0.000362461	0.00185					215.88	7.5625e-05	2.922e-05	5.45313e-05	8.609e-05
-12.1	0.00146	0.00317	0.00036285	0.00185					215.9	4.89063e-05	5.31e-06	7.39063e-05	5.781e-05
-12.08	0.00146	0.00317	0.00036326	0.00185					215.92	8.53125e-05	3.297e-05	9.53125e-05	7.625e-05
-12.06	0.00145	0.00317	0.000363689	0.00185					215.94	0.000105313	3.438e-05	8.39063e-05	6e-05
-12.04	0.00145	0.00317	0.000364135	0.00186					215.96	7.60938e-05	2.625e-05	7.39063e-05	0.00010266
-12.02	0.00145	0.00317	0.000364593	0.00186					215.98	5.07813e-05	5.47e-06	6.21875e-05	7.547e-05
-12	0.00145	0.00317	0.000365062	0.00186					216	9.90625e-05	2.313e-05	4.20313e-05	8.297e-05
-11.98	0.00145	0.00317	0.000365539	0.00186					216.02	9.29688e-05	7.344e-05	6.71875e-05	7.75e-05
-11.96	0.00145	0.00317	0.000366022	0.00186					216.04	4.60938e-05	3.016e-05	5.625e-05	6.891e-05
-11.94	0.00145	0.00317	0.000366506	0.00186					216.06	5.73438e-05	-5.16e-06	1.29688e-05	4.141e-05
-11.92	0.00145	0.00317	0.000366991	0.00186					216.08	6.98438e-05	6.297e-05	4.6875e-06	2.094e-05
-11.9	0.00145	0.00317	0.000367473	0.00186					216.1	7e-05	8.078e-05	3.20313e-05	4.813e-05
-11.88	0.00145	0.00317	0.000367949	0.00186					216.12	9.34375e-05	4.297e-05	2.39063e-05	2.359e-05
-11.86	0.00145	0.00317	0.000368419	0.00186					216.14	5.98438e-05	-4.06e-06	-6.5625e-06	-2.66e-06
-11.84	0.00145	0.00317	0.000368879	0.00186					216.16	6.39062e-05	4.453e-05	5.125e-05	-2.19e-06
-11.82	0.00145	0.00317	0.000369327	0.00186					216.18	7.45312e-05	0.00010234	6.48438e-05	4.84e-06
-11.8	0.00145	0.00317	0.000369761	0.00186					216.2	4.01563e-05	4.141e-05	2.03125e-05	2.922e-05
-11.78	0.00145	0.00316	0.00037018	0.00186					216.22	5.5e-05	2.078e-05	-1.35938e-05	2.891e-05
-11.76	0.00145	0.00316	0.000370581	0.00186					216.24	9.46875e-05	6.078e-05	6.9375e-05	1.625e-05
-11.74	0.00145	0.00316	0.000370964	0.00186					216.26	5.0625e-05	0.00010875	7.29688e-05	2.391e-05
-11.72	0.00145	0.00316	0.000371327	0.00186					216.28	4.39063e-05	5.563e-05	4.26563e-05	7.594e-05
-11.7	0.00145	0.00316	0.000371669	0.00185					216.3	6.64063e-05	7.03e-06	6.89063e-05	5.203e-05
-11.68	0.00145	0.00316	0.000371988	0.00185					216.32	8.53125e-05	3.734e-05	7.40625e-05	3.5e-05
-11.66	0.00145	0.00316	0.000372284	0.00185					216.34	9.0625e-05	7.953e-05	6.78125e-05	9.375e-05
-11.64	0.00145	0.00316	0.000372556	0.00185					216.36	6.17188e-05	1.75e-05	0.000126406	9.266e-05
-11.62	0.00145	0.00316	0.000372802	0.00185					216.38	6.14063e-05	2.469e-05	5.48438e-05	8.172e-05
-11.6	0.00145	0.00316	0.000373024	0.00185					216.4	0.000100469	3.766e-05	4.90625e-05	6.484e-05
-11.58	0.00145	0.00316	0.000373219	0.00185					216.42	8.10938e-05	2.406e-05	0.000110469	7.953e-05
-11.56	0.00145	0.00316	0.000373388	0.00185					216.44	4.65625e-05	6.438e-05	7.57813e-05	0.00012531
-11.54	0.00145	0.00316	0.00037353	0.00185					216.46	7.09375e-05	5.734e-05	1.78125e-05	6.594e-05
-11.52	0.00145	0.00316	0.000373645	0.00185					216.48	0.000115	3.875e-05	4.76563e-05	4.125e-05
-11.5	0.00145	0.00316	0.000373734	0.00185					216.5	6.85938e-05	4.922e-05	9.84375e-05	5.188e-05
-11.48	0.00145	0.00316	0.000373795	0.00185					216.52	5.46875e-05	0.00011281	2.26563e-05	4.719e-05
-11.46	0.00145	0.00316	0.00037383	0.00185					216.54	9.57813e-05	4.406e-05	1.04688e-05	9.984e-05
-11.44	0.00145	0.00316	0.000373839	0.00185					216.56	6.96875e-05	3.594e-05	3.59375e-05	4.438e-05
-11.42	0.00145	0.00316	0.00037382	0.00185					216.58	5.29688e-05	0.00010078	2.3125e-05	7.34e-06
-11.4	0.00145	0.00316	0.000373776	0.00185					216.6	4.25e-05	0.00010656	7.8125e-06	5.656e-05
-11.38	0.00145	0.00316	0.000373707	0.00185					216.62	4.95313e-05	9.906e-05	1.67187e-05	5.219e-05
-11.36	0.00145	0.00316	0.000373612	0.00184					216.64	8.03125e-05	8.922e-05	4.09375e-05	2.625e-05
-11.34	0.00145	0.00316	0.000373493	0.00184					216.66	5.96875e-05	8.109e-05	6.89063e-05	3.078e-05
-11.32	0.00145	0.00316	0.00037335	0.00184					216.68	7.14063e-05	6.469e-05	3.40625e-05	8.031e-05
-11.3	0.00145	0.00316	0.000373185	0.00184					216.7	4.92188e-05	0.00010516	1.28125e-05	6.453e-05
-11.28	0.00145	0.00316	0.000372997	0.00184					216.72	7.90625e-05	5.391e-05	8.15625e-05	4.875e-05
-11.26	0.00145	0.00316	0.000372788	0.00184					216.74	6.85938e-05	3.844e-05	8.625e-05	5.516e-05
-11.24	0.00145	0.00316	0.000372559	0.00184					216.76	5.79688e-05	9.047e-05	2.21875e-05	7.781e-05
-11.22	0.00145	0.00316	0.000372312	0.00184					216.78	6.95313e-05	7.266e-05	2.60938e-05	5.281e-05
-11.2	0.00145	0.00316	0.000372047	0.00184					216.8	3.01563e-05	1.719e-05	8.64063e-05	6.781e-05
-11.18	0.00145	0.00316	0.000371766	0.00184					216.82	5.07813e-05	4.078e-05	7.51563e-05	7.547e-05
-11.16	0.00145	0.00316	0.000371471	0.00184					216.84	9.32813e-05	2.625e-05	5.48438e-05	5.328e-05
-11.14	0.00145	0.00316	0.000371163	0.00184					216.86	9.4375e-05	5.531e-05	6.54688e-05	4.859e-05
-11.12	0.00146	0.00316	0.000370844	0.00184					216.88	7.65625e-05	8.13e-06	8.40625e-05	3.844e-05
-11.1	0.00146	0.00316	0.000370516	0.00184					216.9	9.78125e-05	4.406e-05	5.14063e-05	4.578e-05
-11.08	0.00146	0.00316	0.00037018	0.00184					216.92	0.0001	9.53e-06	4.84375e-05	6.609e-05
-11.06	0.00146	0.00316	0.00036984	0.00184					216.94	9.5625e-05	1.313e-05	5.95313e-05	5.594e-05
-11.04	0.00146	0.00316	0.000369497	0.00184					216.96	3.71875e-05	3.391e-05	9.64063e-05	4.406e-05
-11.02	0.00146	0.00316	0.000369154	0.00184					216.98	6.0625e-05	6.313e-05	3.79688e-05	1.125e-05
-11	0.00146	0.00316	0.000368812	0.00184					217	8.65625e-05	5.281e-05	4.10938e-05	0.00010313
-10.98	0.00146	0.00316	0.000368475	0.00184					217.02	4.29688e-05	4.953e-05	7.92188e-05	5.359e-05
-10.96	0.00146	0.00316	0.000368144	0.00184					217.04	7.35938e-05	9.938e-05	2.4375e-05	3.28e-06
-10.94	0.00146	0.00316	0.000367822	0.00184					217.06	6.34375e-05	6.094e-05	2.20313e-05	4.375e-05
-10.92	0.00146	0.00316	0.000367512	0.00184					217.08	8.5e-05	2.531e-05	7.28125e-05	0.00012766
-10.9	0.00146	0.00316	0.000367215	0.00184					217.1	5.1875e-05	6.234e-05	6.60938e-05	5.219e-05
-10.88	0.00146	0.00316	0.000366935	0.00184					217.12	1.53125e-05	0.00011031	2.14063e-05	1.109e-05
-10.86	0.00146	0.00316	0.000366674	0.00184					217.14	5.82813e-05	5.75e-05	2e-05	0.00010094
-10.84	0.00146	0.00316	0.000366433	0.00184					217.16	6.39062e-05	-3.28e-06	3.32813e-05	8.484e-05
-10.82	0.00146	0.00317	0.000366215	0.00184					217.18	7.60938e-05	5.156e-05	4.21875e-05	2.156e-05
-10.8	0.00146	0.00317	0.000366023	0.00185					217.2	3.25e-05	4.188e-05	4.48438e-05	8.594e-05
-10.78	0.00146	0.00317	0.000365857	0.00185					217.22	5.57813e-05	1.094e-05	1.90625e-05	3.531e-05
-10.76	0.00146	0.00317	0.00036572	0.00185					217.24	7.64063e-05	3.313e-05	3.90625e-05	2.109e-05
-10.74	0.00146	0.00317	0.000365613	0.00185					217.26	6.6875e-05	3.359e-05	4.40625e-05	5.156e-05
-10.72	0.00146	0.00317	0.000365537	0.00185					217.28	7.04688e-05	-2.19e-06	2.01562e-05	1.094e-05
-10.7	0.00146	0.00317	0.000365494	0.00185					217.3	8.35938e-05	1.844e-05	3.39063e-05	2.25e-05
-10.68	0.00146	0.00317	0.000365484	0.00185					217.32	4.79688e-05	-8.44e-06	3.1875e-05	3.047e-05
-10.66	0.00146	0.00317	0.000365508	0.00185					217.34	4e-05	2.25e-05	8.3125e-05	2.047e-05
-10.64	0.00146	0.00317	0.000365566	0.00185					217.36	6.26563e-05	6.313e-05	5.125e-05	-1.016e-05
-10.62	0.00146	0.00317	0.000365658	0.00185					217.38	0.000102188	1.422e-05	3.89063e-05	5.63e-06
-10.6	0.00146	0.00317	0.000365785	0.00185					217.4	8.32813e-05	5.47e-06	5.26563e-05	3.828e-05
-10.58	0.00146	0.00317	0.000365945	0.00185					217.42	5.9375e-05	6.531e-05	7.45312e-05	1.688e-05
-10.56	0.00146	0.00317	0.000366138	0.00186					217.44	7.14063e-05	6.234e-05	9.5e-05	3.594e-05
-10.54	0.00146	0.00317	0.000366363	0.00186					217.46	8.3125e-05	-1.6e-07	3.625e-05	1.844e-05
-10.52	0.00146	0.00317	0.000366619	0.00186					217.48	6.46875e-05	4.25e-05	5.98438e-05	4.234e-05
-10.5	0.00146	0.00317	0.000366903	0.00186					217.5	5.40625e-05	3.828e-05	5.79688e-05	6.609e-05
-10.48	0.00146	0.00317	0.000367215	0.00186					217.52	5.09375e-05	3.469e-05	9.03125e-05	9.172e-05
-10.46	0.00146	0.00317	0.000367552	0.00186					217.54	4.54688e-05	4.5e-05	8.78125e-05	4.25e-05
-10.44	0.00146	0.00318	0.000367912	0.00186					217.56	6.25e-05	3.516e-05	7.65625e-06	5.313e-05
-10.42	0.00146	0.00318	0.000368293	0.00186					217.58	8.23438e-05	5.297e-05	4.90625e-05	2.313e-05
-10.4	0.00146	0.00318	0.000368692	0.00186					217.6	8.45313e-05	2.047e-05	9.29688e-05	7.063e-05
-10.38	0.00146	0.00318	0.000369106	0.00186					217.62	8.40625e-05	-2.66e-06	9.84375e-06	0.00015828
-10.36	0.00146	0.00318	0.000369533	0.00186					217.64	8.85938e-05	0	3.21875e-05	1.922e-05
-10.34	0.00146	0.00318	0.00036997	0.00186					217.66	3.51563e-05	-2.66e-06	6.29688e-05	2.406e-05
-10.32	0.00146	0.00318	0.000370414	0.00186					217.68	2.375e-05	4.156e-05	5.45313e-05	9.922e-05
-10.3	0.00146	0.00318	0.000370862	0.00186					217.7	5.625e-05	1.406e-05	2.1875e-05	6.25e-05
-10.28	0.00146	0.00318	0.00037131	0.00186					217.72	6.75e-05	-9.4e-07	5.09375e-05	-1.187e-05
-10.26	0.00146	0.00318	0.000371757	0.00186					217.74	2.98438e-05	2.266e-05	2.53125e-05	3.656e-05
-10.24	0.00146	0.00317	0.000372198	0.00186					217.76	4.89063e-05	4.797e-05	1.25e-05	3.031e-05
-10.22	0.00146	0.00317	0.000372631	0.00186					217.78	5.29688e-05	6.75e-05	6.5625e-06	1.063e-05
-10.2	0.00146	0.00317	0.000373054	0.00186					217.8	7.10938e-05	-3.12e-06	7.15625e-05	1.969e-05
-10.18	0.00146	0.00317	0.000373464	0.00186					217.82	7.29688e-05	7.031e-05	3.0625e-05	1.953e-05
-10.16	0.00146	0.00317	0.000373857	0.00186					217.84	9.34375e-05	8.984e-05	1.23437e-05	6.531e-05
-10.14	0.00146	0.00317	0.000374232	0.00186					217.86	6.82813e-05	6.063e-05	5.32813e-05	-1.875e-05
-10.12	0.00146	0.00317	0.000374586	0.00186					217.88	5.20313e-05	8.281e-05	6.39062e-05	-7.03e-06
-10.1	0.00146	0.00317	0.000374918	0.00186					217.9	9.96875e-05	6.484e-05	2.98438e-05	5.016e-05
-10.08	0.00146	0.00317	0.000375225	0.00186					217.92	8.40625e-05	4.813e-05	4.0625e-05	6.188e-05
-10.06	0.00146	0.00317	0.000375506	0.00186					217.94	7.03125e-05	4.797e-05	5.01563e-05	1.031e-05
-10.04	0.00146	0.00317	0.00037576	0.00186					217.96	7.53125e-05	7.688e-05	8.70313e-05	6.41e-06
-10.02	0.00146	0.00317	0.000375984	0.00186					217.98	4.34375e-05	8.5e-05	5.92188e-05	0.00013625
-10	0.00146	0.00317	0.000376178	0.00186					218	8.29688e-05	-1.359e-05	4.20313e-05	5.641e-05
-9.98	0.00146	0.00317	0.000376341	0.00186					218.02	6.45312e-05	2.734e-05	6.125e-05	-2.234e-05
-9.96	0.00146	0.00317	0.000376473	0.00186					218.04	4.46875e-05	7.578e-05	0.000108125	9.422e-05
-9.94	0.00146	0.00317	0.000376573	0.00186					218.06	4.53125e-05	5.922e-05	6.32813e-05	0.00011188
-9.92	0.00146	0.00317	0.000376641	0.00186					218.08	4.96875e-05	-1.094e-05	2.875e-05	3.969e-05
-9.9	0.00146	0.00317	0.000376677	0.00185					218.1	6.96875e-05	8.109e-05	6.4375e-05	3.91e-06
-9.88	0.00146	0.00316	0.000376681	0.00185					218.12	5.4375e-05	7.391e-05	6.65625e-05	8.563e-05
-9.86	0.00146	0.00316	0.000376654	0.00185					218.14	5.42187e-05	1.031e-05	4.95313e-05	0.00013672
-9.84	0.00146	0.00316	0.000376596	0.00185					218.16	9.32813e-05	4.25e-05	8.17188e-05	6.156e-05
-9.82	0.00146	0.00316	0.000376508	0.00185					218.18	8.46875e-05	6.766e-05	7.9375e-05	3.44e-06
-9.8	0.00146	0.00316	0.00037639	0.00185					218.2	3.60937e-05	6.969e-05	5.26563e-05	6.359e-05
-9.78	0.00146	0.00316	0.000376244	0.00185					218.22	1.84375e-05	3.938e-05	3.6875e-05	9.688e-05
-9.76	0.00146	0.00316	0.000376072	0.00185					218.24	5.78125e-05	7.281e-05	4.84375e-05	4.406e-05
-9.74	0.00146	0.00316	0.000375874	0.00185					218.26	6e-05	0.00010625	7.875e-05	1.781e-05
-9.72	0.00146	0.00316	0.000375651	0.00185					218.28	6.40625e-05	8.188e-05	7.96875e-06	7.688e-05
-9.7	0.00146	0.00316	0.000375406	0.00185					218.3	5.65625e-05	9.688e-05	5.92188e-05	9.094e-05
-9.68	0.00146	0.00316	0.00037514	0.00185					218.32	8.07813e-05	7.813e-05	3.48438e-05	4.891e-05
-9.66	0.00146	0.00316	0.000374855	0.00185					218.34	0.0001025	8.078e-05	3.51563e-05	5.766e-05
-9.64	0.00146	0.00316	0.000374552	0.00185					218.36	6.73438e-05	0.00011328	2.65625e-06	3.594e-05
-9.62	0.00146	0.00316	0.000374234	0.00185					218.38	4.57813e-05	7.875e-05	-1.29688e-05	0.00010922
-9.6	0.00146	0.00316	0.000373902	0.00184					218.4	7.34375e-05	8.922e-05	3.95313e-05	5.563e-05
-9.58	0.00146	0.00316	0.000373558	0.00184					218.42	8.85938e-05	6.781e-05	1.60937e-05	2.734e-05
-9.56	0.00146	0.00316	0.000373205	0.00184					218.44	6.3125e-05	5.563e-05	-2.67187e-05	7.297e-05
-9.54	0.00146	0.00316	0.000372844	0.00184					218.46	5.26563e-05	4.047e-05	2.14063e-05	7.516e-05
-9.52	0.00146	0.00316	0.000372478	0.00184					218.48	6.45312e-05	8.984e-05	7.09375e-05	4.453e-05
-9.5	0.00146	0.00316	0.000372109	0.00184					218.5	7.04688e-05	2.484e-05	6.5625e-06	0.00010359
-9.48	0.00146	0.00316	0.000371738	0.00184					218.52	2.1875e-05	3.141e-05	2.9375e-05	8.078e-05
-9.46	0.00146	0.00316	0.000371368	0.00184					218.54	9.40625e-05	2.109e-05	8.10938e-05	9.22e-06
-9.44	0.00146	0.00316	0.000371001	0.00184					218.56	9.84375e-05	2.828e-05	4.89063e-05	9.938e-05
-9.42	0.00146	0.00316	0.000370639	0.00184					218.58	7.8125e-06	6.938e-05	0.000100469	0.00010313
-9.4	0.00146	0.00316	0.000370285	0.00184					218.6	2.65625e-05	4.109e-05	9.15625e-05	4.969e-05
-9.38	0.00147	0.00317	0.000369939	0.00184					218.62	7.3125e-05	2.172e-05	5.125e-05	2.75e-05
-9.36	0.00147	0.00317	0.000369604	0.00184					218.64	7.32813e-05	6.453e-05	8.71875e-05	7.969e-05
-9.34	0.00147	0.00317	0.000369283	0.00184					218.66	8.28125e-06	5.188e-05	9.28125e-05	9.844e-05
-9.32	0.00147	0.00317	0.000368976	0.00184					218.68	6.5625e-05	1.953e-05	8.45313e-05	4.22e-06
-9.3	0.00147	0.00317	0.000368686	0.00184					218.7	0.00010375	7.938e-05	3.46875e-05	2.266e-05
-9.28	0.00147	0.00317	0.000368414	0.00184					218.72	3.53125e-05	3.922e-05	7e-05	3.656e-05
-9.26	0.00147	0.00317	0.000368163	0.00184					218.74	4.29688e-05	6.641e-05	0.0001075	7.266e-05
-9.24	0.00147	0.00317	0.000367932	0.00184					218.76	7.60938e-05	3.44e-06	4.15625e-05	6.375e-05
-9.22	0.00147	0.00317	0.000367725	0.00184					218.78	8.10938e-05	5.344e-05	1.70312e-05	1.641e-05
-9.2	0.00147	0.00317	0.000367542	0.00184					218.8	5.07813e-05	3.703e-05	3.57813e-05	5.047e-05
-9.18	0.00147	0.00317	0.000367384	0.00184					218.82	2.3125e-05	3.734e-05	5.59375e-05	7.078e-05
-9.16	0.00147	0.00317	0.000367253	0.00184					218.84	8.75e-05	4.844e-05	2.04687e-05	5.719e-05
-9.14	0.00147	0.00317	0.000367149	0.00184					218.86	9.15625e-05	-6.09e-06	7.1875e-06	4.234e-05
-9.12	0.00147	0.00317	0.000367073	0.00184					218.88	7.29688e-05	3.797e-05	4.39063e-05	2.594e-05
-9.1	0.00147	0.00317	0.000367025	0.00184					218.9	9.48438e-05	4.5e-05	1.54688e-05	6.406e-05
-9.08	0.00147	0.00317	0.000367007	0.00184					218.92	5.0625e-05	3.484e-05	-4.6875e-06	4.563e-05
-9.06	0.00147	0.00317	0.000367018	0.00184					218.94	4.8125e-05	1.422e-05	5.15625e-06	1.141e-05
-9.04	0.00147	0.00317	0.000367059	0.00184					218.96	8.07813e-05	3.5e-05	5.53125e-05	6.734e-05
-9.02	0.00147	0.00318	0.000367128	0.00185					218.98	6.64063e-05	2.078e-05	2.57812e-05	5.172e-05
-9	0.00147	0.00318	0.000367227	0.00185					219	6.76563e-05	2.25e-05	6.85938e-05	4.344e-05
-8.98	0.00147	0.00318	0.000367355	0.00185					219.02	3.34375e-05	4.531e-05	5.70313e-05	3.484e-05
-8.96	0.00147	0.00318	0.000367511	0.00185					219.04	5.8125e-05	6.578e-05	7.28125e-05	2.844e-05
-8.94	0.00147	0.00318	0.000367694	0.00185					219.06	7.54688e-05	-2.844e-05	4.26563e-05	5.734e-05
-8.92	0.00147	0.00318	0.000367904	0.00185					219.08	8.51563e-05	3.453e-05	3.32813e-05	4.984e-05
-8.9	0.00147	0.00318	0.000368139	0.00185					219.1	4.20313e-05	0.00011906	6.625e-05	7.5e-05
-8.88	0.00147	0.00318	0.000368398	0.00185					219.12	3.90625e-05	6.25e-06	7.10938e-05	2.719e-05
-8.86	0.00147	0.00318	0.000368681	0.00185					219.14	6.17188e-05	-3e-05	3.6875e-05	6.281e-05
-8.84	0.00147	0.00318	0.000368984	0.00185					219.16	4.51563e-05	4.797e-05	5.125e-05	5.703e-05
-8.82	0.00147	0.00318	0.000369308	0.00185					219.18	6.73438e-05	3.5e-05	8.3125e-05	4e-05
-8.8	0.00147	0.00318	0.00036965	0.00185					219.2	5.23438e-05	-7.66e-06	6.6875e-05	1.156e-05
-8.78	0.00147	0.00318	0.000370009	0.00185					219.22	5.96875e-05	2.906e-05	4.23438e-05	3.734e-05
-8.76	0.00147	0.00318	0.000370383	0.00185					219.24	5.6875e-05	1.531e-05	7.6875e-05	4.094e-05
-8.74	0.00147	0.00318	0.000370769	0.00185					219.26	7.34375e-05	5.78e-06	9.92188e-05	-1.09e-06
-8.72	0.00147	0.00318	0.000371166	0.00186					219.28	6.3125e-05	-1.72e-06	4.20313e-05	4.594e-05
-8.7	0.00147	0.00318	0.000371571	0.00186					219.3	3.35938e-05	9.38e-06	5.71875e-05	4.672e-05
-8.68	0.00147	0.00318	0.000371984	0.00186					219.32	5.625e-05	-9.53e-06	5.60938e-05	-1.406e-05
-8.66	0.00147	0.00318	0.000372401	0.00186					219.34	7.20313e-05	3.953e-05	4.35938e-05	2.297e-05
-8.64	0.00147	0.00318	0.000372821	0.00186					219.36	4.25e-05	6.469e-05	7.20313e-05	2.766e-05
-8.62	0.00147	0.00318	0.000373242	0.00186					219.38	4.84375e-05	2.578e-05	4.53125e-06	3.156e-05
-8.6	0.00147	0.00318	0.000373661	0.00186					219.4	9.23438e-05	-1.562e-05	-6.5625e-06	3.844e-05
-8.58	0.00147	0.00318	0.000374077	0.00186					219.42	6.92187e-05	6.359e-05	4.42188e-05	3.797e-05
-8.56	0.00147	0.00318	0.000374488	0.00186					219.44	6.09375e-05	9.844e-05	2.67188e-05	9e-05
-8.54	0.00147	0.00318	0.000374891	0.00186					219.46	7.82813e-05	3.906e-05	1.71875e-06	3.063e-05
-8.52	0.00147	0.00318	0.000375286	0.00186					219.48	6.35938e-05	-9.69e-06	9.25e-05	6.828e-05
-8.5	0.00147	0.00318	0.000375669	0.00186					219.5	9.39063e-05	8.703e-05	-1.25e-06	7.641e-05
-8.48	0.00147	0.00318	0.00037604	0.00186					219.52	5.70313e-05	0.00011844	-1.0625e-05	8.984e-05
-8.46	0.00147	0.00317	0.000376397	0.00186					219.54	5.98438e-05	5.016e-05	5.125e-05	7.922e-05
-8.44	0.00147	0.00317	0.000376738	0.00186					219.56	7.25e-05	4.703e-05	5.98438e-05	3.75e-05
-8.42	0.00147	0.00317	0.000377062	0.00186					219.58	0.000101563	7.609e-05	7.34375e-06	7.234e-05
-8.4	0.00147	0.00317	0.000377367	0.00186					219.6	8e-05	8.172e-05	2.01562e-05	6.313e-05
-8.38	0.00147	0.00317	0.000377652	0.00186					219.62	6.5e-05	2.984e-05	5.70313e-05	0.00010375
-8.36	0.00147	0.00317	0.000377916	0.00186					219.64	8.95313e-05	2.75e-05	5.70313e-05	4.563e-05
-8.34	0.00147	0.00317	0.000378158	0.00186					219.66	5.98438e-05	7.391e-05	2.85938e-05	1.313e-05
-8.32	0.00147	0.00317	0.000378376	0.00186					219.68	3.84375e-05	6.609e-05	5.92188e-05	3.063e-05
-8.3	0.00147	0.00317	0.000378571	0.00185					219.7	6.82813e-05	1.25e-05	6.6875e-05	5.031e-05
-8.28	0.00147	0.00317	0.00037874	0.00185					219.72	6.84375e-05	1.203e-05	5.92188e-05	1.828e-05
-8.26	0.00147	0.00317	0.000378883	0.00185					219.74	5.875e-05	7.719e-05	8.73438e-05	3.609e-05
-8.24	0.00147	0.00317	0.000379	0.00185					219.76	4.48438e-05	6.828e-05	4.3125e-05	6.031e-05
-8.22	0.00147	0.00317	0.00037909	0.00185					219.78	6.34375e-05	4.7e-07	8.0625e-05	1.094e-05
-8.2	0.00147	0.00316	0.000379152	0.00185					219.8	6.82813e-05	7.641e-05	0.000114375	3.141e-05
-8.18	0.00147	0.00316	0.000379187	0.00185					219.82	2.09375e-05	8.563e-05	6.46875e-05	6.969e-05
-8.16	0.00147	0.00316	0.000379194	0.00185					219.84	3.54688e-05	4.547e-05	4.34375e-05	4.938e-05
-8.14	0.00147	0.00316	0.000379173	0.00185					219.86	4.48438e-05	4.141e-05	6.375e-05	4.375e-05
-8.12	0.00147	0.00316	0.000379125	0.00185					219.88	2.78125e-05	0.00012234	4.51563e-05	6.141e-05
-8.1	0.00147	0.00316	0.000379048	0.00185					219.9	9.375e-06	0.00011484	8.125e-06	0.00010578
-8.08	0.00147	0.00316	0.000378944	0.00185					219.92	5.125e-05	1.25e-05	-7.34375e-06	9.219e-05
-8.06	0.00147	0.00316	0.000378813	0.00185					219.94	9.51563e-05	6e-05	5.53125e-05	0.00011047
-8.04	0.00147	0.00316	0.000378656	0.00185					219.96	5.64063e-05	0.00010391	4.40625e-05	0.00011781
-8.02	0.00147	0.00316	0.000378472	0.00185					219.98	3.4375e-05	7.406e-05	-3.29687e-05	0.00010891
-8	0.00147	0.00316	0.000378264	0.00185					220	8.5625e-05	3.719e-05	3.5e-05	0.00011969
-7.98	0.00147	0.00316	0.000378033	0.00185					220.02	9.70313e-05	2.391e-05	6.92187e-05	0.00012266
-7.96	0.00147	0.00316	0.000377778	0.00185					220.04	4.29688e-05	8.484e-05	1.1875e-05	8.188e-05
-7.94	0.00147	0.00316	0.000377502	0.00184					220.06	5.89063e-05	9.078e-05	-1.07812e-05	8.391e-05
-7.92	0.00147	0.00316	0.000377206	0.00184					220.08	9.92188e-05	5.531e-05	5.625e-05	4.578e-05
-7.9	0.00147	0.00316	0.000376892	0.00184					220.1	8.3125e-05	1.906e-05	4.54688e-05	4.813e-05
-7.88	0.00147	0.00316	0.000376561	0.00184					220.12	8.1875e-05	8.453e-05	1.64062e-05	3.063e-05
-7.86	0.00147	0.00316	0.000376215	0.00184					220.14	7.75e-05	4.656e-05	3.45313e-05	4.875e-05
-7.84	0.00147	0.00316	0.000375856	0.00184					220.16	9.79688e-05	3.203e-05	9.39063e-05	-6.41e-06
-7.82	0.00147	0.00316	0.000375487	0.00184					220.18	7.5625e-05	6.734e-05	3.625e-05	2.844e-05
-7.8	0.00147	0.00316	0.000375109	0.00184					220.2	6e-05	6.797e-05	2.65625e-05	4.672e-05
-7.78	0.00147	0.00316	0.000374725	0.00184					220.22	9.95313e-05	6.453e-05	7.17188e-05	-1.047e-05
-7.76	0.00147	0.00316	0.000374337	0.00184					220.24	7.04688e-05	3.125e-05	9.3125e-05	3.266e-05
-7.74	0.00147	0.00316	0.000373947	0.00184					220.26	4.71875e-05	7.578e-05	4.53125e-05	3.422e-05
-7.72	0.00147	0.00316	0.000373559	0.00184					220.28	2.5e-05	7.172e-05	9.90625e-05	1.594e-05
-7.7	0.00147	0.00316	0.000373174	0.00184					220.3	5.5625e-05	3.813e-05	8.78125e-05	9.359e-05
-7.68	0.00147	0.00316	0.000372795	0.00184					220.32	5.84375e-05	4e-05	2.9375e-05	4.969e-05
-7.66	0.00147	0.00316	0.000372425	0.00184					220.34	1.34375e-05	7.5e-05	5.32813e-05	6.719e-05
-7.64	0.00148	0.00316	0.000372066	0.00184					220.36	5.07813e-05	3.781e-05	7.70313e-05	0.00010953
-7.62	0.00148	0.00316	0.00037172	0.00184					220.38	3.375e-05	-1.72e-06	3.57813e-05	9.484e-05
-7.6	0.00148	0.00316	0.000371391	0.00184					220.4	5.78125e-06	5e-05	1.65625e-05	2.5e-05
-7.58	0.00148	0.00316	0.000371079	0.00184					220.42	4.46875e-05	5.875e-05	1.45313e-05	0.00011141
-7.56	0.00148	0.00317	0.000370788	0.00185					220.44	1.82813e-05	1.344e-05	7.78125e-05	0.00010875
-7.54	0.00148	0.00317	0.000370519	0.00185					220.46	5.15625e-05	-1.844e-05	6.54688e-05	4.281e-05
-7.52	0.00148	0.00317	0.000370273	0.00185					220.48	4.0625e-05	4.906e-05	-1.45313e-05	6.266e-05
-7.5	0.00148	0.00317	0.000370054	0.00185					220.5	6.40625e-05	5.266e-05	-2.65625e-06	7.828e-05
-7.48	0.00148	0.00317	0.000369861	0.00185					220.52	6.89063e-05	1.563e-05	7.45312e-05	4.344e-05
-7.46	0.00148	0.00317	0.000369696	0.00185					220.54	4.53125e-05	-2.641e-05	4.26563e-05	7.5e-06
-7.44	0.00148	0.00317	0.00036956	0.00185					220.56	7.21875e-05	2.906e-05	1.625e-05	7.219e-05
-7.42	0.00148	0.00317	0.000369454	0.00185					220.58	9.71875e-05	1.766e-05	4.17188e-05	4.391e-05
-7.4	0.00148	0.00317	0.000369378	0.00185					220.6	7.21875e-05	4.578e-05	8.04688e-05	-2.203e-05
-7.38	0.00148	0.00317	0.000369333	0.00185					220.62	4.3125e-05	1.484e-05	2.42188e-05	-1.6e-07
-7.36	0.00148	0.00317	0.000369317	0.00185					220.64	7.75e-05	3.484e-05	2.03125e-05	4.438e-05
-7.34	0.00148	0.00317	0.000369332	0.00185					220.66	0.000121719	4.672e-05	8.03125e-05	7.03e-06
-7.32	0.00148	0.00317	0.000369376	0.00185					220.68	8.8125e-05	4.156e-05	6.51563e-05	2.281e-05
-7.3	0.00148	0.00317	0.000369448	0.00185					220.7	3.57813e-05	5.078e-05	4.65625e-05	2.891e-05
-7.28	0.00148	0.00317	0.000369548	0.00185					220.72	8.45313e-05	6.578e-05	3.5625e-05	5.875e-05
-7.26	0.00148	0.00318	0.000369674	0.00185					220.74	8.34375e-05	2.516e-05	3.625e-05	4.938e-05
-7.24	0.00148	0.00318	0.000369824	0.00185					220.76	3.95313e-05	1.6e-07	5.79688e-05	3.13e-06
-7.22	0.00148	0.00318	0.000369998	0.00185					220.78	2.59375e-05	2.922e-05	0.000100156	9.4e-07
-7.2	0.00148	0.00318	0.000370193	0.00185					220.8	5.17188e-05	7.438e-05	7.92188e-05	8.281e-05
-7.18	0.00148	0.00318	0.000370406	0.00185					220.82	3.625e-05	-1.891e-05	8.90625e-06	4.984e-05
-7.16	0.00148	0.00318	0.000370637	0.00185					220.84	3.29688e-05	2.03e-06	3.34375e-05	2.97e-06
-7.14	0.00148	0.00318	0.000370883	0.00185					220.86	3.46875e-05	3.016e-05	8.65625e-05	4.813e-05
-7.12	0.00148	0.00318	0.000371142	0.00185					220.88	8.07813e-05	3.438e-05	7.03125e-05	5.797e-05
-7.1	0.00148	0.00318	0.00037141	0.00185					220.9	5.125e-05	-2.609e-05	4.57813e-05	4.313e-05
-7.08	0.00148	0.00318	0.000371687	0.00186					220.92	4.0625e-05	2.813e-05	1.59375e-05	3.234e-05
-7.06	0.00148	0.00318	0.00037197	0.00186					220.94	6.71875e-05	2.297e-05	8.73438e-05	2.156e-05
-7.04	0.00148	0.00318	0.000372256	0.00186					220.96	5.125e-05	3.125e-05	7.46875e-05	2.75e-05
-7.02	0.00148	0.00318	0.000372544	0.00186					220.98	6.5e-05	4.063e-05	-6.09375e-06	2.97e-06
-7	0.00148	0.00318	0.000372832	0.00186					221	7.79688e-05	9.53e-06	3.03125e-05	2.813e-05
-6.98	0.00148	0.00318	0.000373116	0.00186					221.02	5.9375e-05	4.5e-05	2.20313e-05	7.625e-05
-6.96	0.00147	0.00318	0.000373397	0.00186					221.04	5.125e-05	9.219e-05	2.01562e-05	-1.56e-06
-6.94	0.00147	0.00318	0.000373671	0.00186					221.06	7.09375e-05	1.063e-05	4.625e-05	3.91e-06
-6.92	0.00147	0.00318	0.000373938	0.00186					221.08	6.95313e-05	2.594e-05	3.20313e-05	6.922e-05
-6.9	0.00147	0.00318	0.000374197	0.00186					221.1	7.57813e-05	2.219e-05	3.625e-05	9.391e-05
-6.88	0.00147	0.00318	0.000374445	0.00186					221.12	3.84375e-05	4.828e-05	7.70313e-05	-3.91e-06
-6.86	0.00147	0.00318	0.000374683	0.00186					221.14	5.54688e-05	6.969e-05	3.85938e-05	1.656e-05
-6.84	0.00147	0.00318	0.000374909	0.00186					221.16	8.29688e-05	6.828e-05	3.21875e-05	0.00010844
-6.82	0.00147	0.00318	0.000375123	0.00186					221.18	4.9375e-05	1.297e-05	4e-05	7.375e-05
-6.8	0.00147	0.00318	0.000375324	0.00186					221.2	3.21875e-05	2.563e-05	8.9375e-05	-2.66e-06
-6.78	0.00147	0.00318	0.000375513	0.00185					221.22	8.09375e-05	8.922e-05	8.84375e-05	5.031e-05
-6.76	0.00147	0.00318	0.000375688	0.00185					221.24	6.29688e-05	0.0001025	4.64063e-05	0.00011188
-6.74	0.00147	0.00318	0.000375852	0.00185					221.26	5.34375e-05	-1.484e-05	5.07813e-05	4.031e-05
-6.72	0.00147	0.00318	0.000376003	0.00185					221.28	6.625e-05	5.94e-06	8.1875e-05	1.375e-05
-6.7	0.00147	0.00317	0.000376142	0.00185					221.3	4.78125e-05	6.484e-05	4.10938e-05	5.672e-05
-6.68	0.00147	0.00317	0.000376269	0.00185					221.32	5.6875e-05	6.234e-05	7.17188e-05	6.906e-05
-6.66	0.00147	0.00317	0.000376385	0.00185					221.34	3.76563e-05	2.906e-05	8.375e-05	3.984e-05
-6.64	0.00147	0.00317	0.000376491	0.00185					221.36	4.76563e-05	4.484e-05	7.03125e-06	3.266e-05
-6.62	0.00147	0.00317	0.000376588	0.00185					221.38	5.90625e-05	4.172e-05	2.07813e-05	9.406e-05
-6.6	0.00147	0.00317	0.000376676	0.00185					221.4	0.000100313	8.813e-05	3.84375e-05	4.859e-05
-6.58	0.00147	0.00317	0.000376755	0.00185					221.42	6.29688e-05	3.828e-05	5.79688e-05	9.469e-05
-6.56	0.00147	0.00317	0.000376827	0.00185					221.44	4.14063e-05	3.484e-05	2.4375e-05	8.625e-05
-6.54	0.00147	0.00317	0.000376893	0.00185					221.46	9.15625e-05	6.953e-05	1.48438e-05	3.516e-05
-6.52	0.00147	0.00317	0.000376952	0.00185					221.48	8.79688e-05	6.672e-05	6.53125e-05	3.984e-05
-6.5	0.00147	0.00317	0.000377006	0.00185					221.5	1.5625e-05	6.609e-05	5.3125e-05	9.813e-05
-6.48	0.00147	0.00317	0.000377056	0.00185					221.52	4.34375e-05	5.469e-05	5.3125e-06	0.0001125
-6.46	0.00147	0.00317	0.000377101	0.00185					221.54	7.0625e-05	6.719e-05	7.8125e-06	6.094e-05
-6.44	0.00147	0.00317	0.000377142	0.00185					221.56	1.84375e-05	0.00011031	7.82813e-05	6.063e-05
-6.42	0.00147	0.00317	0.00037718	0.00185					221.58	5.09375e-05	7.203e-05	6.89063e-05	6.828e-05
-6.4	0.00147	0.00316	0.000377215	0.00184					221.6	6.20313e-05	3.109e-05	3.28125e-05	8.656e-05
-6.38	0.00147	0.00316	0.000377247	0.00184					221.62	5.04688e-05	8.109e-05	4.64063e-05	6.297e-05
-6.36	0.00147	0.00316	0.000377276	0.00184					221.64	1.98438e-05	5.734e-05	6.45312e-05	7.391e-05
-6.34	0.00147	0.00316	0.000377302	0.00184					221.66	3.01563e-05	4.359e-05	7.28125e-05	9.969e-05
-6.32	0.00147	0.00316	0.000377325	0.00184					221.68	3.65625e-05	4.344e-05	2.73438e-05	4.109e-05
-6.3	0.00147	0.00316	0.000377346	0.00184					221.7	7.04688e-05	4.266e-05	6.375e-05	3.672e-05
-6.28	0.00147	0.00316	0.000377363	0.00184					221.72	7.60938e-05	6.188e-05	3.375e-05	8.203e-05
-6.26	0.00147	0.00316	0.000377377	0.00184					221.74	5.8125e-05	5.781e-05	2.42188e-05	7.047e-05
-6.24	0.00147	0.00316	0.000377388	0.00184					221.76	3.98438e-05	4.375e-05	4.29688e-05	9.672e-05
-6.22	0.00147	0.00316	0.000377395	0.00184					221.78	7.40625e-05	8.891e-05	4.71875e-05	4.844e-05
-6.2	0.00147	0.00316	0.000377399	0.00184					221.8	0.000116094	3.75e-05	3.82813e-05	2.328e-05
-6.18	0.00147	0.00316	0.000377398	0.00184					221.82	9.04688e-05	1.125e-05	-1.39063e-05	7.516e-05
-6.16	0.00147	0.00316	0.000377393	0.00184					221.84	5.57813e-05	0.000115	5.25e-05	8.891e-05
-6.14	0.00148	0.00316	0.000377383	0.00184					221.86	5.85938e-05	0.00010281	4.875e-05	2.906e-05
-6.12	0.00148	0.00316	0.000377368	0.00184					221.88	6.5625e-05	3.844e-05	6.09375e-06	3.953e-05
-6.1	0.00148	0.00316	0.000377349	0.00184					221.9	8.65625e-05	5e-05	5.14063e-05	7.422e-05
-6.08	0.00148	0.00316	0.000377325	0.00184					221.92	3.4375e-05	6.641e-05	5.0625e-05	5.563e-05
-6.06	0.00148	0.00316	0.000377296	0.00184					221.94	3.45313e-05	9.844e-05	6.75e-05	7.922e-05
-6.04	0.00148	0.00316	0.000377262	0.00184					221.96	8.67188e-05	3.344e-05	4.42188e-05	4.922e-05
-6.02	0.00148	0.00316	0.000377223	0.00184					221.98	5.71875e-05	4.125e-05	-1.375e-05	4.469e-05
-6	0.00148	0.00316	0.00037718	0.00184					222	2.45313e-05	6.172e-05	1.21875e-05	5.906e-05
-5.98	0.00148	0.00316	0.000377133	0.00184					222.02	4.29688e-05	3.422e-05	7.0625e-05	5.109e-05
-5.96	0.00148	0.00316	0.000377081	0.00184					222.04	4.17188e-05	1.172e-05	4.26563e-05	-1.594e-05
-5.94	0.00148	0.00316	0.000377026	0.00184					222.06	1.20312e-05	1.063e-05	2.5625e-05	5.719e-05
-5.92	0.00148	0.00316	0.000376968	0.00184					222.08	7.03125e-06	2.5e-05	6e-05	8.781e-05
-5.9	0.00148	0.00316	0.000376907	0.00185					222.1	4.54688e-05	5.219e-05	0.00010875	1.094e-05
-5.88	0.00148	0.00316	0.000376844	0.00185					222.12	5.82813e-05	4.7e-07	1.85938e-05	2.5e-06
-5.86	0.00148	0.00316	0.000376779	0.00185					222.14	4.28125e-05	3.641e-05	1.17187e-05	9.125e-05
-5.84	0.00148	0.00317	0.000376713	0.00185					222.16	7.09375e-05	2.797e-05	0.00010125	4.547e-05
-5.82	0.00148	0.00317	0.000376647	0.00185					222.18	5.20313e-05	1.391e-05	4.34375e-05	-1.109e-05
-5.8	0.00148	0.00317	0.000376581	0.00185					222.2	4.51563e-05	5.547e-05	2.46875e-05	6.625e-05
-5.78	0.00148	0.00317	0.000376515	0.00185					222.22	6.25e-05	-1.328e-05	3.10938e-05	5.047e-05
-5.76	0.00148	0.00317	0.000376451	0.00185					222.24	7.95313e-05	2.938e-05	4.78125e-05	5.375e-05
-5.74	0.00148	0.00317	0.000376389	0.00185					222.26	7.76563e-05	5.922e-05	5.82813e-05	6.75e-05
-5.72	0.00148	0.00317	0.000376329	0.00185					222.28	2.98438e-05	4.656e-05	2.25e-05	3.266e-05
-5.7	0.00148	0.00317	0.000376272	0.00185					222.3	5.34375e-05	1.047e-05	2.4375e-05	5.016e-05
-5.68	0.00148	0.00317	0.000376218	0.00185					222.32	0.000104219	2.656e-05	7.4375e-05	7.563e-05
-5.66	0.00149	0.00317	0.000376169	0.00185					222.34	6.45312e-05	4.5e-05	3.39063e-05	5.844e-05
-5.64	0.00149	0.00318	0.000376123	0.00185					222.36	2.5625e-05	2.266e-05	4.92188e-05	5.891e-05
-5.62	0.00149	0.00318	0.000376082	0.00186					222.38	7.42188e-05	5.406e-05	7.375e-05	4.375e-05
-5.6	0.00149	0.00318	0.000376046	0.00186					222.4	5.54688e-05	9.84e-06	4.03125e-05	2.953e-05
-5.58	0.00148	0.00318	0.000376015	0.00186					222.42	4.01563e-05	4.031e-05	2.5625e-05	2.016e-05
-5.56	0.00148	0.00318	0.000375989	0.00186					222.44	2.95313e-05	7.19e-06	6.26563e-05	1e-05
-5.54	0.00148	0.00318	0.000375968	0.00186					222.46	5.64063e-05	-1.562e-05	7.65625e-05	4.375e-05
-5.52	0.00148	0.00318	0.000375953	0.00186					222.48	4.45313e-05	4.297e-05	2.89063e-05	3.281e-05
-5.5	0.00148	0.00318	0.000375944	0.00186					222.5	5.01563e-05	1.41e-06	1.46875e-05	-3.141e-05
-5.48	0.00148	0.00318	0.00037594	0.00186					222.52	3.6875e-05	-2.97e-06	7.5e-05	-2.266e-05
-5.46	0.00148	0.00318	0.000375941	0.00186					222.54	6.23438e-05	1.406e-05	4.73438e-05	5.703e-05
-5.44	0.00148	0.00318	0.000375949	0.00186					222.56	5.8125e-05	-5.31e-06	2.8125e-06	1.172e-05
-5.42	0.00148	0.00318	0.000375962	0.00186					222.58	2.4375e-05	-1.719e-05	6.45312e-05	-2.312e-05
-5.4	0.00148	0.00318	0.00037598	0.00186					222.6	4.875e-05	3.875e-05	6.375e-05	2.813e-05
-5.38	0.00148	0.00318	0.000376004	0.00186					222.62	6.35938e-05	3.484e-05	2.57812e-05	7.406e-05
-5.36	0.00148	0.00318	0.000376034	0.00186					222.64	5.40625e-05	2.078e-05	3.9375e-05	9.84e-06
-5.34	0.00148	0.00318	0.000376069	0.00186					222.66	7.15625e-05	2.063e-05	6.54688e-05	5.141e-05
-5.32	0.00148	0.00318	0.00037611	0.00186					222.68	5.67188e-05	6.172e-05	5.64063e-05	4.922e-05
-5.3	0.00148	0.00318	0.000376156	0.00186					222.7	6.85938e-05	2.688e-05	3.73438e-05	5.641e-05
-5.28	0.00148	0.00318	0.000376208	0.00186					222.72	6.85938e-05	6.594e-05	1.89063e-05	4.109e-05
-5.26	0.00148	0.00318	0.000376265	0.00186					222.74	5.67188e-05	4.156e-05	1.875e-05	6.141e-05
-5.24	0.00148	0.00318	0.000376329	0.00186					222.76	5.89063e-05	4.453e-05	9.28125e-05	8.719e-05
-5.22	0.00148	0.00318	0.000376397	0.00186					222.78	7.1875e-05	3.563e-05	3.73438e-05	5.297e-05
-5.2	0.00148	0.00318	0.000376472	0.00186					222.8	5.71875e-05	9.031e-05	1.23437e-05	4.859e-05
-5.18	0.00148	0.00318	0.000376552	0.00186					222.82	4.375e-05	0.00010469	9.84375e-05	4.328e-05
-5.16	0.00148	0.00318	0.000376638	0.00186					222.84	5.35938e-05	5.094e-05	7.53125e-05	5.188e-05
-5.14	0.00148	0.00318	0.000376729	0.00186					222.86	7.4375e-05	2.063e-05	3.51563e-05	5.984e-05
-5.12	0.00148	0.00318	0.000376826	0.00185					222.88	4.95313e-05	8.469e-05	6.78125e-05	6.125e-05
-5.1	0.00148	0.00318	0.000376928	0.00185					222.9	2.04687e-05	0.00010031	0.000118438	4.891e-05
-5.08	0.00148	0.00318	0.000377036	0.00185					222.92	5.54688e-05	1.09e-06	-1.0625e-05	3.063e-05
-5.06	0.00147	0.00318	0.000377148	0.00185					222.94	5.90625e-05	3.078e-05	1.75e-05	4.438e-05
-5.04	0.00147	0.00318	0.000377265	0.00185					222.96	5.54688e-05	0.00010188	8.03125e-05	1.781e-05
-5.02	0.00147	0.00318	0.000377386	0.00185					222.98	3.79688e-05	5.172e-05	5.59375e-05	3.75e-05
-5	0.00147	0.00318	0.00037751	0.00185					223	3.4375e-05	1.125e-05	5.73438e-05	5.766e-05
-4.98	0.00147	0.00317	0.000377637	0.00185					223.02	5.29688e-05	7.953e-05	3.28125e-06	4.172e-05
-4.96	0.00147	0.00317	0.000377767	0.00185					223.04	7.29688e-05	2.594e-05	-3.28125e-06	8.422e-05
-4.94	0.00147	0.00317	0.000377897	0.00185					223.06	6.85938e-05	-4.53e-06	2.625e-05	6.563e-05
-4.92	0.00147	0.00317	0.000378027	0.00185					223.08	9.14063e-05	5.203e-05	1.03125e-05	2.281e-05
-4.9	0.00147	0.00317	0.000378156	0.00185					223.1	3.1875e-05	2.891e-05	3.96875e-05	6.406e-05
-4.88	0.00147	0.00317	0.000378283	0.00185					223.12	4.65625e-05	4.344e-05	2.40625e-05	7.953e-05
-4.86	0.00147	0.00317	0.000378407	0.00185					223.14	6e-05	7.984e-05	2.98438e-05	9.984e-05
-4.84	0.00147	0.00317	0.000378525	0.00185					223.16	5.53125e-05	5.922e-05	4.42188e-05	4.375e-05
-4.82	0.00147	0.00317	0.000378637	0.00185					223.18	3.51563e-05	3.297e-05	1.375e-05	4.375e-05
-4.8	0.00147	0.00317	0.00037874	0.00185					223.2	6.8125e-05	6.016e-05	3.96875e-05	0.00015047
-4.78	0.00147	0.00317	0.000378834	0.00185					223.22	6.625e-05	7.313e-05	8.04688e-05	8.219e-05
-4.76	0.00147	0.00317	0.000378916	0.00185					223.24	5.15625e-05	8.922e-05	7.39063e-05	2.313e-05
-4.74	0.00147	0.00317	0.000378985	0.00185					223.26	6.23438e-05	6.594e-05	4.54688e-05	9.172e-05
-4.72	0.00147	0.00316	0.000379039	0.00185					223.28	8.98438e-05	7.141e-05	6.07813e-05	8.734e-05
-4.7	0.00147	0.00316	0.000379077	0.00185					223.3	5.60938e-05	4.703e-05	9.34375e-05	4.313e-05
-4.68	0.00147	0.00316	0.000379098	0.00185					223.32	3.8125e-05	7.641e-05	4.625e-05	6.813e-05
-4.66	0.00147	0.00316	0.000379098	0.00185					223.34	4.0625e-05	0.00011906	4.15625e-05	6.172e-05
-4.64	0.00147	0.00316	0.000379079	0.00184					223.36	5.96875e-05	8.25e-05	9.98438e-05	5.688e-05
-4.62	0.00147	0.00316	0.000379037	0.00184					223.38	5.07813e-05	5.344e-05	5.26563e-05	5.781e-05
-4.6	0.00147	0.00316	0.000378973	0.00184					223.4	5.34375e-05	7.063e-05	2.84375e-05	5.281e-05
-4.58	0.00147	0.00316	0.000378886	0.00184					223.42	6.57813e-05	8.641e-05	4.75e-05	7.688e-05
-4.56	0.00147	0.00316	0.000378775	0.00184					223.44	4.48438e-05	7.797e-05	4.46875e-05	6.625e-05
-4.54	0.00148	0.00316	0.00037864	0.00184					223.46	5.60938e-05	4.297e-05	8.125e-06	7.016e-05
-4.52	0.00148	0.00316	0.00037848	0.00184					223.48	6.64063e-05	4.438e-05	1.3125e-05	7.25e-05
-4.5	0.00148	0.00316	0.000378297	0.00184					223.5	5.625e-05	9.141e-05	1.65625e-05	4.063e-05
-4.48	0.00148	0.00316	0.00037809	0.00184					223.52	4.26563e-05	5.625e-05	4.65625e-05	6.781e-05
-4.46	0.00148	0.00316	0.000377861	0.00184					223.54	3.78125e-05	-1.641e-05	4.79688e-05	0.00010703
-4.44	0.00148	0.00316	0.00037761	0.00184					223.56	5.125e-05	5.875e-05	3.89063e-05	7.109e-05
-4.42	0.00148	0.00316	0.000377339	0.00184					223.58	3.26563e-05	4.625e-05	2.92188e-05	5.938e-05
-4.4	0.00148	0.00316	0.000377051	0.00184					223.6	7.25e-05	-1.547e-05	6.14063e-05	5.797e-05
-4.38	0.00148	0.00316	0.000376746	0.00184					223.62	4.60938e-05	1.109e-05	6.78125e-05	8.844e-05
-4.36	0.00148	0.00316	0.000376427	0.00184					223.64	2.51563e-05	5.641e-05	5.75e-05	2.359e-05
-4.34	0.00148	0.00316	0.000376097	0.00184					223.66	5.25e-05	1.344e-05	8.09375e-05	-3.75e-06
-4.32	0.00148	0.00316	0.000375757	0.00184					223.68	1.1875e-05	-1.562e-05	5.28125e-05	4.781e-05
-4.3	0.00148	0.00316	0.000375412	0.00184					223.7	3.34375e-05	3.703e-05	6.82813e-05	6.422e-05
-4.28	0.00148	0.00316	0.000375065	0.00184					223.72	3.48438e-05	1.891e-05	7.34375e-05	2.063e-05
-4.26	0.00148	0.00316	0.000374717	0.00184					223.74	6.34375e-05	1.016e-05	4.98438e-05	2.375e-05
-4.24	0.00148	0.00317	0.000374373	0.00184					223.76	7.23438e-05	4.156e-05	5.70313e-05	6.234e-05
-4.22	0.00148	0.00317	0.000374036	0.00184					223.78	4e-05	7.188e-05	6.65625e-05	4.594e-05
-4.2	0.00148	0.00317	0.000373709	0.00185					223.8	7.21875e-05	3.469e-05	-2.375e-05	2.219e-05
-4.18	0.00148	0.00317	0.000373396	0.00185					223.82	7.28125e-05	8.91e-06	5.35938e-05	1.078e-05
-4.16	0.00148	0.00317	0.000373099	0.00185					223.84	6.26563e-05	3.859e-05	6.96875e-05	0.00010391
-4.14	0.00149	0.00317	0.000372821	0.00185					223.86	3.875e-05	8.234e-05	-8.90625e-06	3.922e-05
-4.12	0.00149	0.00317	0.000372566	0.00185					223.88	2.57812e-05	6.609e-05	-5.46875e-06	-7.8e-07
-4.1	0.00149	0.00317	0.000372336	0.00185					223.9	7.95313e-05	1.828e-05	6.09375e-05	7.25e-05
-4.08	0.00149	0.00317	0.000372134	0.00185					223.92	5.67188e-05	5.703e-05	5e-05	0.00011703
-4.06	0.00149	0.00317	0.000371962	0.00185					223.94	4.84375e-05	7.141e-05	-9.375e-06	2.031e-05
-4.04	0.00149	0.00317	0.000371822	0.00185					223.96	7.73438e-05	4.016e-05	3.8125e-05	4.891e-05
-4.02	0.00149	0.00317	0.000371715	0.00185					223.98	7.53125e-05	-1.953e-05	8.25e-05	9.375e-05
-4	0.00149	0.00317	0.000371643	0.00185					224	5.70313e-05	3.547e-05	3e-05	9.328e-05
-3.98	0.00149	0.00317	0.000371606	0.00185					224.02	6.54688e-05	3.344e-05	2.45313e-05	1.453e-05
-3.96	0.00149	0.00318	0.000371605	0.00185					224.04	4.07813e-05	1.25e-06	5.71875e-05	4.5e-05
-3.94	0.00149	0.00318	0.000371641	0.00185					224.06	4.51563e-05	-1.719e-05	9.6875e-05	7.844e-05
-3.92	0.00149	0.00318	0.000371713	0.00185					224.08	5.42187e-05	1.41e-06	0.000100156	1.641e-05
-3.9	0.00149	0.00318	0.00037182	0.00185					224.1	3.90625e-05	2.359e-05	4.67188e-05	-2.937e-05
-3.88	0.00149	0.00318	0.000371963	0.00185					224.12	3.23438e-05	-1.984e-05	7.40625e-05	2.34e-06
-3.86	0.00149	0.00318	0.000372139	0.00185					224.14	3.29688e-05	-6.141e-05	0.000103281	4.313e-05
-3.84	0.00149	0.00318	0.000372346	0.00185					224.16	4.39063e-05	1.5e-05	8.67188e-05	4.109e-05
-3.82	0.00149	0.00318	0.000372584	0.00185					224.18	2.625e-05	3.859e-05	4.01563e-05	-4.437e-05
-3.8	0.00149	0.00318	0.00037285	0.00185					224.2	4.875e-05	-6.2e-07	6.39062e-05	-6.72e-06
-3.78	0.00149	0.00318	0.000373142	0.00185					224.22	5.75e-05	-1.87e-06	4.46875e-05	2.344e-05
-3.76	0.00149	0.00318	0.000373457	0.00185					224.24	2.65625e-05	3.266e-05	4.4375e-05	2.422e-05
-3.74	0.00149	0.00318	0.000373792	0.00185					224.26	4.59375e-05	6.72e-06	2.29687e-05	6.56e-06
-3.72	0.00149	0.00318	0.000374145	0.00185					224.28	6.15625e-05	3.859e-05	-1.0625e-05	4.875e-05
-3.7	0.00149	0.00318	0.000374512	0.00185					224.3	6.92187e-05	6.703e-05	6.09375e-05	6.906e-05
-3.68	0.00149	0.00318	0.000374891	0.00185					224.32	6.79688e-05	6.219e-05	2.96875e-05	4.219e-05
-3.66	0.00149	0.00318	0.000375278	0.00185					224.34	6.85938e-05	4.984e-05	-2.42188e-05	2e-05
-3.64	0.00149	0.00318	0.00037567	0.00185					224.36	7.45312e-05	2.203e-05	1.01563e-05	8.438e-05
-3.62	0.00148	0.00318	0.000376065	0.00185					224.38	4.15625e-05	7.609e-05	4.5625e-05	8.75e-05
-3.6	0.00148	0.00318	0.000376459	0.00185					224.4	7.14063e-05	7.609e-05	6.20313e-05	8.375e-05
-3.58	0.00148	0.00318	0.000376849	0.00185					224.42	6.1875e-05	5.813e-05	2.59375e-05	2.219e-05
-3.56	0.00148	0.00318	0.000377234	0.00185					224.44	5.26563e-05	3.891e-05	2.65625e-05	6.156e-05
-3.54	0.00148	0.00318	0.000377609	0.00185					224.46	7.29688e-05	6.484e-05	6.92187e-05	9.531e-05
-3.52	0.00148	0.00318	0.000377973	0.00185					224.48	5.32813e-05	9.75e-05	5.76563e-05	6.672e-05
-3.5	0.00148	0.00318	0.000378324	0.00185					224.5	4.875e-05	5e-05	3.42188e-05	1.09e-06
-3.48	0.00148	0.00318	0.000378659	0.00185					224.52	5.45313e-05	-5.16e-06	7.375e-05	7.969e-05
-3.46	0.00148	0.00318	0.000378977	0.00185					224.54	7.57813e-05	1.609e-05	5.84375e-05	0.00010375
-3.44	0.00148	0.00318	0.000379277	0.00185					224.56	4.625e-05	4.469e-05	7.75e-05	3.672e-05
-3.42	0.00148	0.00318	0.000379556	0.00185					224.58	1.20312e-05	2.219e-05	6.6875e-05	2.563e-05
-3.4	0.00148	0.00318	0.000379814	0.00185					224.6	3.25e-05	1.609e-05	2.75e-05	3.469e-05
-3.38	0.00148	0.00318	0.00038005	0.00185					224.62	3.78125e-05	3.844e-05	7.45312e-05	7.828e-05
-3.36	0.00148	0.00318	0.000380263	0.00185					224.64	2.28125e-05	6.109e-05	6.40625e-05	1.094e-05
-3.34	0.00148	0.00318	0.000380452	0.00185					224.66	6e-05	4.25e-05	5.5e-05	4.422e-05
-3.32	0.00148	0.00318	0.000380619	0.00185					224.68	3.59375e-05	4.984e-05	6.45312e-05	9.203e-05
-3.3	0.00147	0.00318	0.000380761	0.00185					224.7	2.51563e-05	2.5e-06	5.0625e-05	7.797e-05
-3.28	0.00147	0.00318	0.000380881	0.00185					224.72	4.04688e-05	7.766e-05	-4.21875e-06	4.75e-05
-3.26	0.00147	0.00318	0.000380977	0.00185					224.74	6.3125e-05	7.172e-05	1.84375e-05	4.969e-05
-3.24	0.00147	0.00318	0.000381049	0.00185					224.76	5.84375e-05	3.609e-05	3.20313e-05	5.984e-05
-3.22	0.00147	0.00318	0.0003811	0.00185					224.78	4.32813e-05	1.422e-05	2.01562e-05	2.875e-05
-3.2	0.00147	0.00317	0.000381129	0.00185					224.8	4.26563e-05	0.00010422	1.85938e-05	5.75e-05
-3.18	0.00147	0.00317	0.000381136	0.00185					224.82	5.09375e-05	6.531e-05	2.76563e-05	5.297e-05
-3.16	0.00147	0.00317	0.000381123	0.00185					224.84	6.17188e-05	5.641e-05	2.96875e-05	5.641e-05
-3.14	0.00147	0.00317	0.00038109	0.00185					224.86	9.14063e-05	5.859e-05	9.53125e-06	5.578e-05
-3.12	0.00147	0.00317	0.000381039	0.00185					224.88	3.5e-05	8.938e-05	-9.04688e-05	-5.016e-05
-3.1	0.00147	0.00317	0.000380969	0.00185					224.9	-0.00189	-0.00201	-0.00357	-0.00384
-3.08	0.00147	0.00317	0.000380882	0.00185					224.92	0.000710313	-0.00038	0.00365	0.00251
-3.06	0.00147	0.00317	0.00038078	0.00185					224.94	-0.000263281	-0.000862812	-0.00298	-0.00351
-3.04	0.00147	0.00317	0.000380662	0.00185					224.96	0.00132	-0.00049375	0.00307	0.00238
-3.02	0.00147	0.00317	0.00038053	0.00185					224.98	-0.00235	-0.00264	-0.00248	-0.0033
-3	0.00148	0.00317	0.000380384	0.00185					225	0.00297	0.0013	0.000999844	0.00131
-2.98	0.00148	0.00316	0.000380227	0.00185					225.02	-0.00224	-0.00149	0.0008275	0.00033734
-2.96	0.00148	0.00316	0.000380057	0.00185					225.04	0.00224	0.00193	-0.000883125	-0.00067297
-2.94	0.00148	0.00316	0.000379878	0.00185					225.06	-0.000804063	-0.00093875	0.000155938	0.00037031
-2.92	0.00148	0.00316	0.000379688	0.00185					225.08	0.000958281	0.00138	0.000696094	0.00035703
-2.9	0.00148	0.00316	0.000379491	0.00185					225.1	0.00074125	0.00032125	-0.000788906	-0.00046609
-2.88	0.00148	0.00316	0.000379286	0.00185					225.12	-7.14063e-05	0.00043203	0.000874063	0.00083875
-2.86	0.00148	0.00316	0.000379074	0.00185					225.14	0.000582969	0.00061969	-0.000685469	-0.000847812
-2.84	0.00148	0.00316	0.000378856	0.00185					225.16	0.000997656	0.00087016	0.00061125	0.00099797
-2.82	0.00148	0.00316	0.000378634	0.00185					225.18	4.125e-05	0.00063172	0.000147031	-0.00022344
-2.8	0.00148	0.00316	0.000378409	0.00185					225.2	0.000992031	0.00061328	-0.00045	-0.00021406
-2.78	0.00148	0.00316	0.000378181	0.00185					225.22	-2.875e-05	0.00056766	0.000371719	0.00033844
-2.76	0.00148	0.00316	0.000377952	0.00185					225.24	0.00123	0.00115	0.000235469	-5.844e-05
-2.74	0.00148	0.00316	0.000377723	0.00185					225.26	0.000308281	0.00051922	-0.000241719	1.781e-05
-2.72	0.00148	0.00316	0.000377495	0.00185					225.28	0.000421406	0.00071797	6.51563e-05	-0.0001775
-2.7	0.00148	0.00316	0.000377269	0.00185					225.3	0.000904688	0.00089641	-1.5625e-07	2.953e-05
-2.68	0.00148	0.00316	0.000377046	0.00185					225.32	0.000454844	0.00079969	6.20313e-05	-6.41e-06
-2.66	0.00148	0.00316	0.000376827	0.00185					225.34	0.000632188	0.00082609	3.21875e-05	-0.00020422
-2.64	0.00148	0.00316	0.000376614	0.00185					225.36	0.000718594	0.00079734	-5.95313e-05	-2.078e-05
-2.62	0.00149	0.00316	0.000376408	0.00185					225.38	0.000627188	0.00099594	0.000241563	8.984e-05
-2.6	0.00149	0.00316	0.000376209	0.00185					225.4	0.00112	0.00111	0.0002075	9.313e-05
-2.58	0.00149	0.00316	0.000376019	0.00185					225.42	0.00045125	0.00087609	3.32813e-05	7.766e-05
-2.56	0.00149	0.00316	0.000375838	0.00185					225.44	0.00107	0.00114	0.000293906	0.00012469
-2.54	0.00149	0.00316	0.000375669	0.00185					225.46	0.000888281	0.00113	0.000397812	0.0003025
-2.52	0.00149	0.00316	0.00037551	0.00185					225.48	0.00096875	0.00122	0.000264219	0.00015266
-2.5	0.00149	0.00316	0.000375365	0.00185					225.5	0.000780938	0.00089469	0.000173594	0.00012359
-2.48	0.00149	0.00316	0.000375232	0.00185					225.52	0.000745781	0.00103	6.60938e-05	8.656e-05
-2.46	0.00149	0.00317	0.000375112	0.00185					225.54	0.000779063	0.00093297	0.000128125	-6.391e-05
-2.44	0.00149	0.00317	0.000375007	0.00185					225.56	0.000663438	0.00099141	9.53125e-06	-7.187e-05
-2.42	0.00149	0.00317	0.000374916	0.00185					225.58	0.0007975	0.00104	7.75e-05	0.00012063
-2.4	0.00149	0.00317	0.00037484	0.00185					225.6	0.00096375	0.00112	0.000182031	0.00018375
-2.38	0.00149	0.00317	0.000374779	0.00185					225.62	0.000859219	0.00114	0.000226406	0.00011578
-2.36	0.00149	0.00317	0.000374733	0.00185					225.64	0.000933438	0.00115	0.000176875	0.00014188
-2.34	0.00149	0.00317	0.000374702	0.00185					225.66	0.000770938	0.00104	0.000109688	7.797e-05
-2.32	0.00149	0.00317	0.000374686	0.00185					225.68	0.000890313	0.00113	0.000168906	2.422e-05
-2.3	0.00149	0.00317	0.000374684	0.00185					225.7	0.000825781	0.00107	0.000196406	1.922e-05
-2.28	0.00149	0.00317	0.000374697	0.00185					225.72	0.000812813	0.0011	0.000114688	2.34e-06
-2.26	0.00149	0.00317	0.000374723	0.00185					225.74	0.000813594	0.00107	6.8125e-05	-2.297e-05
-2.24	0.00149	0.00318	0.000374764	0.00185					225.76	0.000841719	0.00113	0.000138125	-1.297e-05
-2.22	0.00149	0.00318	0.000374817	0.00185					225.78	0.000881406	0.00108	0.000171719	-4.7e-07
-2.2	0.00149	0.00318	0.000374883	0.00185					225.8	0.000967813	0.00117	0.000108438	4.594e-05
-2.18	0.00149	0.00318	0.000374962	0.00185					225.82	0.000926719	0.0012	0.00015125	8.594e-05
-2.16	0.00149	0.00318	0.000375052	0.00185					225.84	0.00098625	0.0012	0.000274844	0.00012063
-2.14	0.00149	0.00318	0.000375153	0.00185					225.86	0.000917969	0.0012	0.000195156	7.609e-05
-2.12	0.00149	0.00318	0.000375265	0.00185					225.88	0.000944844	0.00119	7.6875e-05	6.188e-05
-2.1	0.00149	0.00318	0.000375387	0.00185					225.9	0.000945156	0.0012	0.00017	7.422e-05
-2.08	0.00149	0.00318	0.000375519	0.00185					225.92	0.000990313	0.00125	0.000277031	0.00012094
-2.06	0.00149	0.00318	0.000375661	0.00185					225.94	0.00101	0.00123	0.000196563	0.00016453
-2.04	0.00149	0.00318	0.000375813	0.00185					225.96	0.000982656	0.00124	0.000124375	0.00014281
-2.02	0.00149	0.00318	0.000375974	0.00185					225.98	0.000971719	0.00124	0.000219063	0.00011031
-2	0.00149	0.00318	0.000376144	0.00185					226	0.0009875	0.00124	0.000197656	0.00013141
-1.98	0.00149	0.00318	0.000376324	0.00185					226.02	0.000953594	0.00119	0.000134844	6.438e-05
-1.96	0.00149	0.00318	0.000376513	0.00185					226.04	0.000944844	0.00116	0.00013625	7.828e-05
-1.94	0.00149	0.00318	0.000376711	0.00185					226.06	0.000920469	0.00122	0.000157344	0.00010813
-1.92	0.00149	0.00318	0.000376918	0.00185					226.08	0.00097125	0.00126	0.000195938	3.734e-05
-1.9	0.00148	0.00318	0.000377136	0.00185					226.1	0.001	0.00124	0.00010875	5.453e-05
-1.88	0.00148	0.00317	0.000377362	0.00185					226.12	0.000991875	0.00125	0.000156094	0.00012078
-1.86	0.00148	0.00317	0.000377599	0.00185					226.14	0.001	0.00128	0.000257344	0.0001275
-1.84	0.00148	0.00317	0.000377845	0.00185					226.16	0.000997344	0.00126	0.000205313	6.344e-05
-1.82	0.00148	0.00317	0.0003781	0.00185					226.18	0.00102	0.00127	0.000187344	8.594e-05
-1.8	0.00148	0.00317	0.000378365	0.00185					226.2	0.000963125	0.00126	0.000180469	0.00010141
-1.78	0.00148	0.00317	0.000378639	0.00185					226.22	0.000958281	0.00125	0.000216094	4.984e-05
-1.76	0.00148	0.00317	0.000378921	0.00185					226.24	0.00103	0.00125	0.000180625	5.578e-05
-1.74	0.00148	0.00317	0.000379212	0.00185					226.26	0.000987813	0.00133	0.000180469	4.453e-05
-1.72	0.00148	0.00317	0.000379508	0.00185					226.28	0.000998906	0.00132	0.000245469	7.563e-05
-1.7	0.00148	0.00317	0.000379811	0.00185					226.3	0.00102	0.0013	0.000227031	0.00014938
-1.68	0.00148	0.00317	0.000380118	0.00185					226.32	0.0011	0.00134	0.000181875	0.00013188
-1.66	0.00148	0.00317	0.000380427	0.00185					226.34	0.00111	0.00134	0.000165469	0.00013953
-1.64	0.00148	0.00317	0.000380737	0.00185					226.36	0.00102	0.0013	0.000229688	0.00017891
-1.62	0.00148	0.00317	0.000381046	0.00185					226.38	0.00106	0.00132	0.000185156	0.00015703
-1.6	0.00148	0.00317	0.000381351	0.00185					226.4	0.00107	0.00133	0.00015875	0.00011172
-1.58	0.00148	0.00317	0.000381649	0.00185					226.42	0.00105	0.00134	0.000173125	0.00010875
-1.56	0.00148	0.00317	0.000381938	0.00185					226.44	0.00104	0.0013	0.000212813	0.00015203
-1.54	0.00148	0.00317	0.000382214	0.00185					226.46	0.00103	0.00131	0.000155781	0.00010359
-1.52	0.00148	0.00317	0.000382475	0.00185					226.48	0.00107	0.0013	0.000168438	0.00010938
-1.5	0.00148	0.00317	0.000382717	0.00185					226.5	0.00108	0.00134	0.000189844	0.00015766
-1.48	0.00148	0.00317	0.000382935	0.00185					226.52	0.00106	0.00133	0.000225625	0.00013031
-1.46	0.00148	0.00317	0.000383128	0.00185					226.54	0.00109	0.00131	0.000184531	8.922e-05
-1.44	0.00148	0.00317	0.000383292	0.00185					226.56	0.00107	0.00131	0.000177813	0.00011125
-1.42	0.00148	0.00317	0.000383423	0.00185					226.58	0.00108	0.0013	0.000208906	0.00012328
-1.4	0.00148	0.00317	0.000383518	0.00185					226.6	0.00105	0.00134	0.000207656	0.00010969
-1.38	0.00148	0.00317	0.000383574	0.00185					226.62	0.0011	0.00136	0.000185938	8.094e-05
-1.36	0.00148	0.00317	0.000383589	0.00185					226.64	0.0011	0.00134	0.000236875	0.00010234
-1.34	0.00148	0.00317	0.00038356	0.00185					226.66	0.00109	0.00134	0.000245156	0.00013234
-1.32	0.00148	0.00317	0.000383486	0.00185					226.68	0.00111	0.00137	0.000224063	0.00011563
-1.3	0.00148	0.00316	0.000383366	0.00185					226.7	0.00108	0.00138	0.000231094	0.00010328
-1.28	0.00148	0.00316	0.000383198	0.00185					226.72	0.00107	0.00133	0.000211406	0.0001125
-1.26	0.00148	0.00316	0.000382982	0.00185					226.74	0.00105	0.00132	0.000251094	0.00014031
-1.24	0.00148	0.00316	0.000382719	0.00185					226.76	0.00111	0.00138	0.000270938	8.922e-05
-1.22	0.00148	0.00316	0.000382411	0.00185					226.78	0.00112	0.00139	0.000179531	0.0001225
-1.2	0.00148	0.00316	0.000382059	0.00184					226.8	0.00108	0.00137	0.000218125	0.00013313
-1.18	0.00148	0.00316	0.000381666	0.00184					226.82	0.00111	0.00135	0.00025875	0.00012469
-1.16	0.00148	0.00316	0.000381235	0.00184					226.84	0.00113	0.00138	0.000213125	0.00015891
-1.14	0.00148	0.00316	0.00038077	0.00184					226.86	0.00112	0.00139	0.000203438	0.00012875
-1.12	0.00148	0.00316	0.000380277	0.00184					226.88	0.00111	0.00132	0.000216719	0.00014563
-1.1	0.00148	0.00315	0.000379761	0.00184					226.9	0.00111	0.00133	0.000217656	9.641e-05
-1.08	0.00148	0.00315	0.000379227	0.00184					226.92	0.00116	0.00139	0.000213594	9.031e-05
-1.06	0.00148	0.00315	0.000378684	0.00184					226.94	0.00112	0.00134	0.00017375	8.859e-05
-1.04	0.00148	0.00315	0.000378137	0.00185					226.96	0.00111	0.00133	0.000214219	8.531e-05
-1.02	0.00148	0.00315	0.000377595	0.00185					226.98	0.00114	0.00133	0.00025875	0.00010953
-1	0.00148	0.00316	0.000377065	0.00185					227	0.00113	0.00136	0.00023	0.00011188
-0.98	0.00148	0.00316	0.000376555	0.00185					227.02	0.00115	0.00134	0.000259063	0.00010438
-0.96	0.00148	0.00316	0.000376074	0.00185					227.04	0.00114	0.00137	0.000203125	0.00013547
-0.94	0.00148	0.00316	0.000375629	0.00185					227.06	0.00118	0.00133	0.000229219	0.00012375
-0.92	0.00149	0.00316	0.000375229	0.00185					227.08	0.00117	0.00136	0.00028625	5.516e-05
-0.9	0.00149	0.00316	0.00037488	0.00185					227.1	0.00115	0.00138	0.000210781	0.00011641
-0.88	0.00149	0.00316	0.00037459	0.00186					227.12	0.00113	0.00133	0.000230781	0.00012297
-0.86	0.00149	0.00317	0.000374365	0.00186					227.14	0.00115	0.00135	0.00027125	7.922e-05
-0.84	0.00149	0.00317	0.00037421	0.00186					227.16	0.00116	0.00137	0.000240156	8.297e-05
-0.82	0.00149	0.00317	0.000374129	0.00186					227.18	0.00113	0.00139	0.000272188	0.00012469
-0.8	0.0015	0.00318	0.000374127	0.00186					227.2	0.00115	0.00136	0.000204844	0.00010953
-0.78	0.0015	0.00318	0.000374206	0.00187					227.22	0.00116	0.00138	0.000252344	9.906e-05
-0.76	0.0015	0.00318	0.000374366	0.00187					227.24	0.00114	0.00141	0.000279531	0.00010281
-0.74	0.0015	0.00318	0.000374608	0.00187					227.26	0.00117	0.00135	0.000244844	0.00010297
-0.72	0.0015	0.00319	0.000374929	0.00187					227.28	0.00117	0.00133	0.000249844	0.00012984
-0.7	0.0015	0.00319	0.000375326	0.00187					227.3	0.00117	0.00137	0.000244688	0.00011156
-0.68	0.00151	0.00319	0.000375795	0.00187					227.32	0.00114	0.00131	0.000290313	0.00010016
-0.66	0.00151	0.00319	0.000376328	0.00187					227.34	0.00114	0.00137	0.000252344	0.00010281
-0.64	0.00151	0.00319	0.000376919	0.00187					227.36	0.00115	0.00137	0.000237969	9.625e-05
-0.62	0.00151	0.0032	0.000377557	0.00187					227.38	0.00115	0.00138	0.000259688	7.594e-05
-0.6	0.00151	0.0032	0.000378231	0.00187					227.4	0.00119	0.0013	0.00022625	0.00012266
-0.58	0.00151	0.0032	0.00037893	0.00187					227.42	0.00117	0.00133	0.000254844	7.844e-05
-0.56	0.00151	0.00319	0.000379638	0.00186					227.44	0.00116	0.0014	0.000215313	6.109e-05
-0.54	0.00151	0.00319	0.000380342	0.00186					227.46	0.00118	0.00134	0.000253281	0.00012094
-0.52	0.00151	0.00319	0.000381026	0.00186					227.48	0.0012	0.00131	0.000270156	7.656e-05
-0.5	0.00151	0.00319	0.000381671	0.00185					227.5	0.00122	0.0014	0.000204688	5.406e-05
-0.48	0.00151	0.00318	0.000382261	0.00185					227.52	0.00119	0.0014	0.000255625	0.00012328
-0.46	0.0015	0.00318	0.000382778	0.00184					227.54	0.00115	0.00138	0.000304844	9.141e-05
-0.44	0.0015	0.00317	0.000383202	0.00184					227.56	0.00123	0.00136	0.000242813	0.00011578
-0.42	0.0015	0.00316	0.000383515	0.00183					227.58	0.00124	0.00139	0.000234375	6.75e-05
-0.4	0.00149	0.00315	0.000383698	0.00182					227.6	0.00123	0.00139	0.000283125	0.00013438
-0.38	0.00148	0.00314	0.000383733	0.00182					227.62	0.0012	0.00137	0.000259375	0.00012313
-0.36	0.00148	0.00313	0.000383602	0.00181					227.64	0.0012	0.00137	0.00024375	0.0001275
-0.34	0.00147	0.00312	0.000383288	0.0018					227.66	0.0012	0.0014	0.000297969	8.563e-05
-0.32	0.00146	0.0031	0.000382775	0.00179					227.68	0.00121	0.00137	0.000323125	0.00012094
-0.3	0.00145	0.00309	0.000382048	0.00178					227.7	0.00119	0.00138	0.000267813	0.00013844
-0.28	0.00144	0.00307	0.000381093	0.00177					227.72	0.00119	0.00139	0.000275469	0.00013266
-0.26	0.00143	0.00305	0.000379898	0.00176					227.74	0.00122	0.0014	0.000319219	0.00012734
-0.24	0.00142	0.00303	0.000378453	0.00175					227.76	0.00122	0.00141	0.000281094	0.00016313
-0.22	0.0014	0.00301	0.00037675	0.00174					227.78	0.00118	0.0014	0.000226406	0.00010781
-0.2	0.00139	0.00299	0.000374783	0.00173					227.8	0.00119	0.00137	0.000264844	0.00013594
-0.18	0.00138	0.00297	0.000372546	0.00173					227.82	0.00122	0.00138	0.00034125	0.00017109
-0.16	0.00136	0.00295	0.000370039	0.00172					227.84	0.00119	0.00142	0.000250313	0.00016094
-0.14	0.00134	0.00292	0.000367261	0.00171					227.86	0.00117	0.00139	0.000202656	0.00010828
-0.12	0.00133	0.0029	0.000364216	0.0017					227.88	0.00119	0.00143	0.000300469	8.797e-05
-0.1	0.00131	0.00287	0.000360907	0.00169					227.9	0.0012	0.00144	0.000277813	0.00011125
-0.08	0.00129	0.00285	0.000357342	0.00169					227.92	0.0012	0.0014	0.000222656	0.00015813
-0.06	0.00127	0.00282	0.00035353	0.00168					227.94	0.00122	0.00141	0.000242656	0.00010891
-0.04	0.00125	0.0028	0.000349483	0.00167					227.96	0.00123	0.00142	0.000303281	9.453e-05
-0.02	0.00123	0.00277	0.000345215	0.00167					227.98	0.00121	0.00141	0.00025	0.00012625
-1.69642e-13	0.00121	0.00275	0.000340739	0.00167					228	0.00124	0.0014	0.000204688	0.00012344
0.02	0.00119	0.00272	0.000336074	0.00166					228.02	0.00126	0.0014	0.000254844	9e-05
0.04	0.00117	0.00269	0.000331237	0.00166					228.04	0.00123	0.0014	0.000280313	0.00011406
0.06	0.00115	0.00267	0.000326249	0.00166					228.06	0.00122	0.00145	0.00025125	0.00012422
0.08	0.00112	0.00264	0.00032113	0.00166					228.08	0.00125	0.00141	0.000229531	7.703e-05
0.1	0.0011	0.00262	0.000315902	0.00166					228.1	0.00127	0.00141	0.000265469	0.00011438
0.12	0.00108	0.00259	0.000310588	0.00166					228.12	0.00127	0.0014	0.00027875	0.00014984
0.14	0.00106	0.00257	0.00030521	0.00166					228.14	0.00125	0.00139	0.000280781	0.00012484
0.16	0.00104	0.00254	0.000299791	0.00167					228.16	0.00125	0.00138	0.000309063	0.00012031
0.18	0.00102	0.00252	0.000294354	0.00167					228.18	0.00128	0.00143	0.000308594	0.0001225
0.2	0.000998641	0.0025	0.000288921	0.00167					228.2	0.00127	0.00143	0.00028875	0.00016734
0.22	0.000978547	0.00247	0.000283515	0.00168					228.22	0.00123	0.00138	0.000272812	0.00010688
0.24	0.000958856	0.00245	0.000278157	0.00169					228.24	0.00124	0.00143	0.000297188	0.00014875
0.26	0.000939612	0.00243	0.000272866	0.00169					228.26	0.00125	0.00142	0.000325156	0.00013906
0.28	0.000920853	0.00241	0.000267663	0.0017					228.28	0.00121	0.00143	0.000279375	0.00013438
0.3	0.000902612	0.00239	0.000262564	0.00171					228.3	0.00124	0.00144	0.000270938	0.00015969
0.32	0.000884914	0.00237	0.000257586	0.00171					228.32	0.00124	0.00141	0.000356875	0.000115
0.34	0.000867781	0.00236	0.000252743	0.00172					228.34	0.00122	0.00144	0.000272188	0.00013719
0.36	0.000851229	0.00234	0.000248048	0.00173					228.36	0.00122	0.00143	0.000271563	0.00014297
0.38	0.000835268	0.00232	0.000243512	0.00174					228.38	0.00124	0.00145	0.000308906	0.00012125
0.4	0.000819903	0.00231	0.000239145	0.00175					228.4	0.00122	0.00144	0.000304531	9.813e-05
0.42	0.000805135	0.00229	0.000234954	0.00176					228.42	0.00122	0.00145	0.000252812	0.00010813
0.44	0.000790957	0.00228	0.000230944	0.00176					228.44	0.00124	0.00144	0.000263125	0.00015547
0.46	0.000777362	0.00226	0.000227118	0.00177					228.46	0.00126	0.00145	0.000278594	0.00012516
0.48	0.000764337	0.00225	0.000223479	0.00178					228.48	0.00124	0.00139	0.000337031	6.594e-05
0.5	0.000751864	0.00224	0.000220026	0.00179					228.5	0.00127	0.0014	0.000253281	9.281e-05
0.52	0.000739923	0.00222	0.000216758	0.00179					228.52	0.00125	0.00142	0.000238281	0.00013156
0.54	0.000728492	0.00221	0.000213672	0.0018					228.54	0.00127	0.00139	0.000298594	0.00011641
0.56	0.000717546	0.0022	0.000210762	0.00181					228.56	0.00132	0.00138	0.000285	0.00016281
0.58	0.000707059	0.00219	0.000208024	0.00181					228.58	0.00127	0.00141	0.000257188	0.00010047
0.6	0.000697002	0.00218	0.000205449	0.00182					228.6	0.00125	0.00148	0.000284844	0.00011969
0.62	0.000687346	0.00216	0.00020303	0.00182					228.62	0.00126	0.0014	0.000242187	0.00018063
0.64	0.000678062	0.00215	0.000200757	0.00182					228.64	0.0013	0.00141	0.000324375	8.656e-05
0.66	0.000669121	0.00214	0.000198623	0.00183					228.66	0.00132	0.00144	0.000304219	0.00010078
0.68	0.000660494	0.00213	0.000196615	0.00183					228.68	0.00127	0.00145	0.000253125	0.00015516
0.7	0.000652152	0.00212	0.000194725	0.00183					228.7	0.00126	0.00145	0.000268438	0.00012828
0.72	0.000644068	0.00211	0.000192942	0.00183					228.72	0.00128	0.00139	0.000309531	9.516e-05
0.74	0.000636218	0.0021	0.000191256	0.00183					228.74	0.0013	0.00142	0.000297969	6.313e-05
0.76	0.000628575	0.00209	0.000189656	0.00183					228.76	0.00124	0.00144	0.000331562	0.0001375
0.78	0.000621119	0.00208	0.000188132	0.00183					228.78	0.00121	0.00139	0.000335	0.00012313
0.8	0.000613829	0.00208	0.000186676	0.00183					228.8	0.00128	0.00141	0.000344219	6.313e-05
0.82	0.000606686	0.00207	0.000185278	0.00183					228.82	0.00129	0.00142	0.00032375	9.484e-05
0.84	0.000599675	0.00206	0.00018393	0.00183					228.84	0.00129	0.00141	0.000313906	9.656e-05
0.86	0.00059278	0.00205	0.000182625	0.00183					228.86	0.00125	0.00144	0.000327344	8.016e-05
0.88	0.000585991	0.00204	0.000181356	0.00183					228.88	0.00131	0.00138	0.000321563	9.047e-05
0.9	0.000579298	0.00203	0.000180117	0.00182					228.9	0.00131	0.0014	0.000379531	0.00012313
0.92	0.000572693	0.00202	0.000178903	0.00182					228.92	0.00129	0.00141	0.000296875	0.00010156
0.94	0.000566169	0.00202	0.000177709	0.00182					228.94	0.0013	0.00139	0.000300625	0.00010313
0.96	0.000559723	0.00201	0.000176534	0.00182					228.96	0.00128	0.00141	0.000325156	7.531e-05
0.98	0.000553353	0.002	0.000175374	0.00181					228.98	0.0013	0.00143	0.000355625	0.00010141
1	0.000547056	0.00199	0.000174227	0.00181					229	0.00131	0.00141	0.000292031	0.00011219
1.02	0.000540834	0.00199	0.000173092	0.00181					229.02	0.00129	0.00143	0.000279844	0.00012281
1.04	0.000534687	0.00198	0.00017197	0.00181					229.04	0.00129	0.00143	0.000305938	9.953e-05
1.06	0.000528617	0.00198	0.000170861	0.00181					229.06	0.0013	0.0014	0.000276563	0.00012172
1.08	0.000522627	0.00197	0.000169764	0.0018					229.08	0.0013	0.0014	0.000284219	0.000155
1.1	0.000516719	0.00196	0.000168682	0.0018					229.1	0.0013	0.00145	0.000285625	0.0001275
1.12	0.000510896	0.00196	0.000167617	0.0018					229.12	0.00127	0.00146	0.000246719	0.00011719
1.14	0.000505162	0.00195	0.000166569	0.0018					229.14	0.00127	0.00142	0.000305313	0.00016609
1.16	0.00049952	0.00195	0.000165541	0.0018					229.16	0.00131	0.00144	0.000299688	0.00013484
1.18	0.000493972	0.00195	0.000164535	0.00179					229.18	0.00129	0.00146	0.000292813	9.031e-05
1.2	0.00048852	0.00194	0.000163554	0.00179					229.2	0.00126	0.00144	0.000292344	0.00011531
1.22	0.000483167	0.00194	0.000162598	0.00179					229.22	0.00126	0.0014	0.00030625	0.00016516
1.24	0.000477914	0.00193	0.00016167	0.00179					229.24	0.0013	0.00143	0.000325	0.00012422
1.26	0.000472762	0.00193	0.000160771	0.00179					229.26	0.00132	0.00144	0.000294219	6.203e-05
1.28	0.000467709	0.00193	0.000159902	0.00179					229.28	0.00129	0.00143	0.000324219	0.00011891
1.3	0.000462757	0.00193	0.000159064	0.00179					229.3	0.00127	0.00138	0.000355781	0.00013828
1.32	0.000457904	0.00192	0.000158258	0.00179					229.32	0.00127	0.00141	0.000292969	0.00010344
1.34	0.000453148	0.00192	0.000157483	0.00179					229.34	0.00133	0.00141	0.00032375	8.344e-05
1.36	0.000448486	0.00192	0.00015674	0.00179					229.36	0.00132	0.00144	0.000308906	0.00011828
1.38	0.000443916	0.00192	0.000156026	0.00179					229.38	0.00132	0.00138	0.00033125	7.797e-05
1.4	0.000439434	0.00192	0.000155341	0.00179					229.4	0.00135	0.00141	0.000308281	0.00010844
1.42	0.000435037	0.00191	0.000154683	0.00179					229.42	0.00134	0.00143	0.000287188	0.00012406
1.44	0.000430722	0.00191	0.00015405	0.00179					229.44	0.00132	0.00138	0.000358125	7.281e-05
1.46	0.000426484	0.00191	0.000153439	0.00179					229.46	0.00132	0.00143	0.000332344	0.00010516
1.48	0.000422319	0.00191	0.000152847	0.00179					229.48	0.00134	0.00139	0.000275156	0.00014031
1.5	0.000418225	0.00191	0.000152271	0.00179					229.5	0.00133	0.00144	0.000306719	0.0001025
1.52	0.000414196	0.00191	0.000151709	0.00179					229.52	0.0013	0.00143	0.000372188	0.00012
1.54	0.000410231	0.0019	0.000151156	0.00179					229.54	0.00133	0.00148	0.000335938	0.000135
1.56	0.000406326	0.0019	0.000150608	0.00179					229.56	0.00133	0.00148	0.000279375	0.00011656
1.58	0.000402478	0.0019	0.000150063	0.00179					229.58	0.00126	0.00148	0.000308125	0.00013844
1.6	0.000398686	0.0019	0.000149517	0.00179					229.6	0.0013	0.00147	0.000330469	0.00018297
1.62	0.000394948	0.0019	0.000148965	0.00179					229.62	0.00134	0.00143	0.000318438	0.00015719
1.64	0.000391264	0.00189	0.000148405	0.00179					229.64	0.00129	0.00147	0.000317813	0.0001225
1.66	0.000387633	0.00189	0.000147834	0.00179					229.66	0.00127	0.00147	0.000292188	0.00015813
1.68	0.000384056	0.00189	0.000147249	0.00179					229.68	0.00131	0.00144	0.000276094	0.00015234
1.7	0.000380533	0.00189	0.000146647	0.00179					229.7	0.0013	0.00144	0.000262344	0.00011172
1.72	0.000377067	0.00189	0.000146025	0.00179					229.72	0.00129	0.00145	0.00031125	0.00014969
1.74	0.000373658	0.00188	0.000145383	0.00179					229.74	0.00126	0.00146	0.000295	0.00018703
1.76	0.000370311	0.00188	0.000144719	0.00179					229.76	0.00131	0.00144	0.000247969	0.00013016
1.78	0.000367027	0.00188	0.000144031	0.00179					229.78	0.00135	0.00142	0.000285625	0.00012781
1.8	0.000363809	0.00188	0.000143319	0.00179					229.8	0.00134	0.00144	0.000294688	0.00014031
1.82	0.000360662	0.00187	0.000142583	0.00179					229.82	0.00132	0.00144	0.000275469	0.00016406
1.84	0.000357589	0.00187	0.000141823	0.00179					229.84	0.00133	0.00141	0.000294219	0.00016453
1.86	0.000354592	0.00187	0.00014104	0.00179					229.86	0.00133	0.00147	0.000297656	0.00011375
1.88	0.000351676	0.00187	0.000140234	0.00179					229.88	0.00136	0.00148	0.00032625	0.00011828
1.9	0.000348844	0.00186	0.000139407	0.00179					229.9	0.00133	0.00141	0.000325156	0.00011359
1.92	0.0003461	0.00186	0.000138561	0.00179					229.92	0.00134	0.00144	0.000347031	0.00013203
1.94	0.000343444	0.00186	0.000137698	0.00179					229.94	0.00134	0.00145	0.000323281	9.484e-05
1.96	0.000340881	0.00186	0.000136819	0.00179					229.96	0.00134	0.00146	0.000328594	0.00010875
1.98	0.000338412	0.00185	0.000135927	0.00179					229.98	0.00136	0.00145	0.000388125	0.00011672
2	0.000336038	0.00185	0.000135024	0.00179					230	0.00134	0.00145	0.00032625	0.00011656
2.02	0.00033376	0.00185	0.000134114	0.00179					230.02	0.00134	0.00148	0.000300938	9.844e-05
2.04	0.000331578	0.00185	0.000133198	0.00179					230.04	0.00131	0.00143	0.000354375	0.00012156
2.06	0.000329491	0.00185	0.000132279	0.00179					230.06	0.00132	0.00144	0.000369219	0.00015172
2.08	0.000327497	0.00184	0.00013136	0.00179					230.08	0.00133	0.00153	0.000336563	0.00012891
2.1	0.000325596	0.00184	0.000130443	0.00179					230.1	0.00134	0.00148	0.000348906	0.00010484
2.12	0.000323783	0.00184	0.00012953	0.00179					230.12	0.0013	0.00145	0.000305156	0.00014516
2.14	0.000322057	0.00184	0.000128624	0.00179					230.14	0.00136	0.00142	0.000300625	0.00015172
2.16	0.000320412	0.00184	0.000127727	0.00179					230.16	0.00135	0.00151	0.000349531	0.00012984
2.18	0.000318844	0.00184	0.000126839	0.00179					230.18	0.00133	0.00147	0.000294062	0.00011641
2.2	0.000317349	0.00183	0.000125963	0.00179					230.2	0.00133	0.00141	0.000258438	0.00013984
2.22	0.000315921	0.00183	0.0001251	0.00179					230.22	0.00135	0.00141	0.000304219	0.00015281
2.24	0.000314554	0.00183	0.000124251	0.00179					230.24	0.00136	0.00149	0.000334375	0.00010281
2.26	0.000313242	0.00183	0.000123416	0.00179					230.26	0.00132	0.00146	0.000297969	0.00011906
2.28	0.000311978	0.00183	0.000122597	0.00179					230.28	0.0013	0.00136	0.000272344	0.00012359
2.3	0.000310757	0.00183	0.000121792	0.00179					230.3	0.00134	0.00143	0.000303281	0.00015766
2.32	0.000309572	0.00183	0.000121003	0.00179					230.32	0.00137	0.00149	0.000359531	0.00014031
2.34	0.000308416	0.00183	0.00012023	0.00179					230.34	0.00135	0.00141	0.000323125	9.484e-05
2.36	0.000307283	0.00183	0.000119471	0.00179					230.36	0.0013	0.00139	0.000287031	0.000185
2.38	0.000306167	0.00182	0.000118727	0.0018					230.38	0.00136	0.00145	0.000324219	0.00013578
2.4	0.000305063	0.00182	0.000117996	0.0018					230.4	0.00135	0.00146	0.000367031	6.609e-05
2.42	0.000303965	0.00182	0.000117279	0.0018					230.42	0.00131	0.00144	0.00036625	9.438e-05
2.44	0.000302867	0.00182	0.000116574	0.0018					230.44	0.00134	0.0014	0.000321875	0.00014641
2.46	0.000301765	0.00182	0.000115881	0.0018					230.46	0.00133	0.00146	0.000389531	0.00013219
2.48	0.000300655	0.00182	0.000115199	0.0018					230.48	0.00137	0.00144	0.000366406	6.484e-05
2.5	0.000299533	0.00182	0.000114528	0.0018					230.5	0.00136	0.00142	0.000289688	8.453e-05
2.52	0.000298395	0.00182	0.000113866	0.0018					230.52	0.00136	0.00144	0.000374844	0.00014531
2.54	0.00029724	0.00182	0.000113214	0.00179					230.54	0.00136	0.00144	0.000397969	7.375e-05
2.56	0.000296064	0.00182	0.000112571	0.00179					230.56	0.00138	0.00139	0.000330938	4.75e-05
2.58	0.000294866	0.00182	0.000111937	0.00179					230.58	0.00139	0.00139	0.000295781	0.00016453
2.6	0.000293644	0.00182	0.000111312	0.00179					230.6	0.00135	0.00143	0.000380625	0.00010547
2.62	0.000292398	0.00181	0.000110696	0.00179					230.62	0.00136	0.00147	0.000382813	6.891e-05
2.64	0.000291127	0.00181	0.00011009	0.00179					230.64	0.00141	0.00144	0.000315313	0.00010297
2.66	0.00028983	0.00181	0.000109493	0.00179					230.66	0.0014	0.00141	0.000300469	0.00011688
2.68	0.000288508	0.00181	0.000108906	0.00179					230.68	0.00135	0.00148	0.000394219	0.00012203
2.7	0.000287161	0.00181	0.000108331	0.00179					230.7	0.00137	0.00146	0.000349688	0.00011391
2.72	0.00028579	0.00181	0.000107768	0.00179					230.72	0.00136	0.00138	0.000256875	0.00010797
2.74	0.000284395	0.00181	0.000107219	0.00179					230.74	0.00135	0.00144	0.000308281	0.00012875
2.76	0.000282978	0.00181	0.000106684	0.00179					230.76	0.00136	0.00146	0.0003925	0.00011875
2.78	0.000281538	0.00181	0.000106164	0.00179					230.78	0.00133	0.00143	0.000345781	0.00010328
2.8	0.000280077	0.00181	0.000105662	0.00179					230.8	0.0013	0.00145	0.000290625	0.00013938
2.82	0.000278596	0.00181	0.000105179	0.00179					230.82	0.00134	0.00148	0.000334688	9.672e-05
2.84	0.000277096	0.00181	0.000104715	0.00179					230.84	0.00134	0.00142	0.000333125	0.00013375
2.86	0.000275577	0.00181	0.000104272	0.00179					230.86	0.00131	0.0014	0.000291094	0.00015219
2.88	0.000274041	0.00181	0.000103852	0.00179					230.88	0.00134	0.00144	0.000321406	0.00010406
2.9	0.000272488	0.00181	0.000103456	0.00179					230.9	0.00136	0.00144	0.000340469	9.906e-05
2.92	0.000270919	0.00181	0.000103084	0.00179					230.92	0.00133	0.00142	0.000337813	0.00015063
2.94	0.000269334	0.00181	0.000102738	0.00178					230.94	0.00134	0.00139	0.000337031	0.00016078
2.96	0.000267734	0.00181	0.000102418	0.00178					230.96	0.00134	0.00147	0.000314063	9.047e-05
2.98	0.00026612	0.00181	0.000102125	0.00178					230.98	0.00137	0.00142	0.000343437	7.703e-05
3	0.00026449	0.00181	0.000101859	0.00178					231	0.00136	0.00139	0.000350313	0.00014531
3.02	0.000262848	0.00181	0.000101621	0.00178					231.02	0.00135	0.00147	0.000352969	0.00014109
3.04	0.000261191	0.00181	0.000101409	0.00178					231.04	0.00139	0.0015	0.000330938	0.00012281
3.06	0.000259522	0.00181	0.000101224	0.00178					231.06	0.00138	0.00143	0.000338281	9.953e-05
3.08	0.000257841	0.00181	0.000101065	0.00178					231.08	0.00135	0.00142	0.000344687	0.00015141
3.1	0.000256148	0.00181	0.00010093	0.00178					231.1	0.00136	0.00147	0.000332656	0.00016188
3.12	0.000254444	0.00181	0.00010082	0.00178					231.12	0.00138	0.00145	0.000374062	0.0001225
3.14	0.000252731	0.00181	0.000100731	0.00178					231.14	0.00137	0.00143	0.000350313	0.00011047
3.16	0.000251011	0.00181	0.000100663	0.00178					231.16	0.00137	0.00145	0.000349688	0.00013891
3.18	0.000249283	0.00181	0.000100614	0.00178					231.18	0.00137	0.00146	0.000315781	0.00014875
3.2	0.000247551	0.00181	0.000100581	0.00178					231.2	0.00139	0.0015	0.000382656	0.00013297
3.22	0.000245817	0.00181	0.000100562	0.00178					231.22	0.00135	0.00146	0.000388281	0.00010844
3.24	0.000244083	0.00181	0.000100555	0.00178					231.24	0.00135	0.00142	0.000289844	0.00012172
3.26	0.000242351	0.00181	0.000100556	0.00178					231.26	0.00139	0.00142	0.000314219	0.00016063
3.28	0.000240625	0.00181	0.000100564	0.00178					231.28	0.00139	0.00148	0.000344219	0.00010266
3.3	0.000238909	0.00181	0.000100576	0.00178					231.3	0.00135	0.00145	0.000340625	0.00011531
3.32	0.000237206	0.00181	0.000100589	0.00178					231.32	0.00138	0.00142	0.000277813	0.00017219
3.34	0.000235519	0.00181	0.0001006	0.00178					231.34	0.00136	0.00147	0.000312813	0.00012328
3.36	0.000233853	0.00181	0.000100606	0.00178					231.36	0.00134	0.0015	0.000336719	6.188e-05
3.38	0.000232212	0.00181	0.000100604	0.00178					231.38	0.00138	0.00147	0.000310313	0.00016063
3.4	0.0002306	0.00181	0.000100593	0.00178					231.4	0.00137	0.00144	0.000287813	0.00019172
3.42	0.000229022	0.00181	0.000100569	0.00178					231.42	0.00135	0.00143	0.000324219	0.00010469
3.44	0.000227482	0.00181	0.00010053	0.00178					231.44	0.00136	0.00148	0.00030625	0.00014938
3.46	0.000225985	0.00181	0.000100475	0.00178					231.46	0.00141	0.00147	0.000279375	0.00012734
3.48	0.000224535	0.00181	0.0001004	0.00178					231.48	0.00137	0.00145	0.000329844	0.00010359
3.5	0.000223136	0.0018	0.000100304	0.00178					231.5	0.00133	0.00147	0.000385625	0.00015391
3.52	0.000221791	0.0018	0.000100186	0.00178					231.52	0.00133	0.00148	0.000312344	0.00012234
3.54	0.000220505	0.0018	0.000100045	0.00178					231.54	0.00136	0.00146	0.000333125	9.156e-05
3.56	0.000219281	0.0018	9.98782e-05	0.00178					231.56	0.00133	0.00146	0.000370938	0.00012031
3.58	0.000218122	0.0018	9.96862e-05	0.00178					231.58	0.00137	0.00148	0.000381875	0.00012938
3.6	0.000217029	0.0018	9.94679e-05	0.00178					231.6	0.00138	0.00145	0.00033875	0.00014625
3.62	0.000216006	0.0018	9.92231e-05	0.00178					231.62	0.00138	0.00147	0.000361094	0.00012094
3.64	0.000215054	0.0018	9.89517e-05	0.00178					231.64	0.00133	0.00144	0.000394688	0.00013828
3.66	0.000214172	0.0018	9.86538e-05	0.00178					231.66	0.00139	0.00143	0.000385156	0.00011594
3.68	0.000213363	0.0018	9.83299e-05	0.00178					231.68	0.00139	0.0014	0.000340781	9.656e-05
3.7	0.000212625	0.00179	9.79806e-05	0.00178					231.7	0.00135	0.00142	0.000352656	0.00010719
3.72	0.000211958	0.00179	9.76068e-05	0.00178					231.72	0.0014	0.00147	0.000359375	0.00010656
3.74	0.00021136	0.00179	9.72095e-05	0.00178					231.74	0.00141	0.00142	0.00035375	0.00015281
3.76	0.00021083	0.00179	9.67899e-05	0.00178					231.76	0.00141	0.00143	0.000329531	0.00010531
3.78	0.000210364	0.00179	9.63496e-05	0.00178					231.78	0.0014	0.00146	0.0002875	5.891e-05
3.8	0.00020996	0.00179	9.58901e-05	0.00178					231.8	0.00144	0.00143	0.000329063	0.0001625
3.82	0.000209614	0.00179	9.54131e-05	0.00178					231.82	0.00141	0.00142	0.000335	0.00013297
3.84	0.000209322	0.00179	9.49206e-05	0.00178					231.84	0.0014	0.00143	0.000286719	0.00010094
3.86	0.000209079	0.00179	9.44144e-05	0.00178					231.86	0.00139	0.00147	0.000339688	0.00014719
3.88	0.000208881	0.00179	9.38966e-05	0.00178					231.88	0.0014	0.00151	0.000345313	0.00011516
3.9	0.000208723	0.00178	9.33694e-05	0.00178					231.9	0.00138	0.00145	0.000311406	0.00011813
3.92	0.000208599	0.00178	9.28349e-05	0.00179					231.92	0.0014	0.00149	0.000338125	0.00012844
3.94	0.000208504	0.00178	9.22953e-05	0.00179					231.94	0.00137	0.00149	0.000357344	8.953e-05
3.96	0.000208432	0.00178	9.17529e-05	0.00179					231.96	0.00138	0.0015	0.000333906	0.00013922
3.98	0.000208378	0.00178	9.12098e-05	0.00179					231.98	0.00138	0.00144	0.000338594	0.00016766
4	0.000208335	0.00178	9.06683e-05	0.00179					232	0.00135	0.00144	0.000361406	0.00010094
4.02	0.000208299	0.00178	9.01305e-05	0.00179					232.02	0.00134	0.0015	0.00036375	7.391e-05
4.04	0.000208263	0.00178	8.95986e-05	0.00179					232.04	0.00139	0.00145	0.0003425	0.00011313
4.06	0.000208222	0.00178	8.90747e-05	0.00179					232.06	0.00134	0.00143	0.000375	0.00013375
4.08	0.000208172	0.00178	8.85607e-05	0.00179					232.08	0.00134	0.00144	0.000371094	0.00010391
4.1	0.000208107	0.00178	8.80587e-05	0.00179					232.1	0.0014	0.00146	0.000344531	9.781e-05
4.12	0.000208022	0.00178	8.75703e-05	0.00179					232.12	0.00139	0.00141	0.000373125	9.406e-05
4.14	0.000207914	0.00178	8.70973e-05	0.00179					232.14	0.00139	0.00139	0.000354062	0.00014203
4.16	0.000207779	0.00178	8.66413e-05	0.00179					232.16	0.0014	0.00144	0.000363281	7.203e-05
4.18	0.000207613	0.00178	8.62038e-05	0.00179					232.18	0.0014	0.00142	0.000364375	9.844e-05
4.2	0.000207414	0.00178	8.57861e-05	0.00179					232.2	0.00141	0.00141	0.000339375	0.00013688
4.22	0.000207177	0.00178	8.53893e-05	0.00179					232.22	0.00141	0.00138	0.000322656	0.00011734
4.24	0.000206902	0.00178	8.50146e-05	0.00179					232.24	0.0014	0.00142	0.000374219	0.00010359
4.26	0.000206587	0.00178	8.46626e-05	0.00179					232.26	0.0014	0.00146	0.000398125	9.953e-05
4.28	0.000206229	0.00178	8.43343e-05	0.00179					232.28	0.00141	0.00143	0.000329063	0.00010156
4.3	0.000205828	0.00178	8.403e-05	0.00179					232.3	0.00143	0.00144	0.000370938	0.00012953
4.32	0.000205383	0.00178	8.37501e-05	0.00179					232.32	0.00141	0.00147	0.000390625	8.391e-05
4.34	0.000204894	0.00178	8.34947e-05	0.00179					232.34	0.0014	0.00144	0.000338281	9.891e-05
4.36	0.000204361	0.00178	8.32639e-05	0.00179					232.36	0.00142	0.00142	0.000381719	0.00016781
4.38	0.000203783	0.00178	8.30573e-05	0.00179					232.38	0.00139	0.00148	0.000349688	0.00013813
4.4	0.000203162	0.00178	8.28747e-05	0.00179					232.4	0.00139	0.00146	0.000330625	9.266e-05
4.42	0.000202498	0.00178	8.27153e-05	0.00179					232.42	0.00139	0.00147	0.000356875	0.00014141
4.44	0.000201792	0.00178	8.25785e-05	0.00179					232.44	0.0014	0.00151	0.000384375	0.00014078
4.46	0.000201046	0.00178	8.24632e-05	0.00179					232.46	0.00137	0.00147	0.000342656	0.000115
4.48	0.000200259	0.00178	8.23682e-05	0.00178					232.48	0.00136	0.00147	0.000314063	0.00010031
4.5	0.000199435	0.00178	8.22924e-05	0.00178					232.5	0.0014	0.00145	0.0003325	0.00012813
4.52	0.000198575	0.00178	8.22342e-05	0.00178					232.52	0.00141	0.00142	0.000334219	0.00013016
4.54	0.00019768	0.00178	8.2192e-05	0.00178					232.54	0.00136	0.00142	0.000303906	0.00010375
4.56	0.000196753	0.00178	8.21641e-05	0.00178					232.56	0.00137	0.00148	0.000338594	0.0001325
4.58	0.000195794	0.00178	8.21485e-05	0.00178					232.58	0.00139	0.00145	0.000323906	0.00011859
4.6	0.000194806	0.00178	8.21433e-05	0.00178					232.6	0.00138	0.00142	0.000362344	9.734e-05
4.62	0.000193792	0.00178	8.21464e-05	0.00178					232.62	0.00135	0.00143	0.000357813	0.00010172
4.64	0.000192753	0.00178	8.21556e-05	0.00178					232.64	0.00142	0.00146	0.000364063	0.00010297
4.66	0.00019169	0.00178	8.21688e-05	0.00178					232.66	0.00142	0.00147	0.000351563	0.0001025
4.68	0.000190608	0.00178	8.21838e-05	0.00178					232.68	0.00138	0.00146	0.000358594	0.00011297
4.7	0.000189507	0.00179	8.21982e-05	0.00178					232.7	0.00138	0.00143	0.000368125	0.00015406
4.72	0.00018839	0.00179	8.22098e-05	0.00178					232.72	0.00144	0.00144	0.000354219	8.453e-05
4.74	0.000187259	0.00179	8.22165e-05	0.00178					232.74	0.00141	0.0015	0.0003525	9.344e-05
4.76	0.000186117	0.00179	8.22161e-05	0.00178					232.76	0.00136	0.0014	0.00038875	0.00014516
4.78	0.000184967	0.00179	8.22066e-05	0.00178					232.78	0.0014	0.00142	0.000400156	0.00013234
4.8	0.000183809	0.00179	8.2186e-05	0.00178					232.8	0.00145	0.00151	0.000349844	9.156e-05
4.82	0.000182649	0.00179	8.21524e-05	0.00178					232.82	0.00139	0.0015	0.000354062	0.00012547
4.84	0.000181487	0.00179	8.21042e-05	0.00178					232.84	0.00139	0.00144	0.000378594	0.0001275
4.86	0.000180327	0.00179	8.20398e-05	0.00178					232.86	0.00144	0.00143	0.000352812	0.00013531
4.88	0.000179171	0.00179	8.19578e-05	0.00177					232.88	0.00139	0.00151	0.000329688	0.00015547
4.9	0.000178022	0.00179	8.18572e-05	0.00177					232.9	0.0014	0.00143	0.000314688	0.00015422
4.92	0.000176883	0.00179	8.17369e-05	0.00177					232.92	0.00142	0.00145	0.000347031	0.00016984
4.94	0.000175758	0.00179	8.15963e-05	0.00177					232.94	0.00143	0.00147	0.000316094	0.00015203
4.96	0.000174648	0.00179	8.14346e-05	0.00177					232.96	0.00142	0.00149	0.000329063	0.00011688
4.98	0.000173557	0.00179	8.12518e-05	0.00177					232.98	0.00137	0.00148	0.000326563	0.00019594
5	0.000172487	0.00179	8.10477e-05	0.00177					233	0.00139	0.00148	0.000335781	0.00016766
5.02	0.000171441	0.00179	8.08224e-05	0.00177					233.02	0.00139	0.00148	0.000325625	0.00015875
5.04	0.000170423	0.00179	8.05763e-05	0.00177					233.04	0.00138	0.00146	0.000333281	0.00017156
5.06	0.000169435	0.00179	8.03101e-05	0.00177					233.06	0.00142	0.00145	0.000321719	0.00012188
5.08	0.000168479	0.00179	8.00245e-05	0.00177					233.08	0.00142	0.00148	0.000385937	0.00011859
5.1	0.000167558	0.00179	7.97205e-05	0.00177					233.1	0.00137	0.00145	0.00034	0.00015672
5.12	0.000166673	0.00178	7.93994e-05	0.00177					233.12	0.00138	0.00148	0.000315469	0.00010141
5.14	0.000165828	0.00178	7.90624e-05	0.00177					233.14	0.0014	0.00147	0.000374062	0.00011609
5.16	0.000165024	0.00178	7.8711e-05	0.00177					233.16	0.00137	0.00148	0.000367656	0.00010125
5.18	0.000164263	0.00178	7.83469e-05	0.00177					233.18	0.0014	0.00152	0.000331875	0.00011063
5.2	0.000163545	0.00178	7.79718e-05	0.00177					233.2	0.0014	0.00145	0.000350313	0.00014313
5.22	0.000162873	0.00178	7.75875e-05	0.00177					233.22	0.00136	0.00143	0.000371563	0.00011328
5.24	0.000162246	0.00178	7.71958e-05	0.00177					233.24	0.00142	0.00151	0.000333438	8.656e-05
5.26	0.000161666	0.00178	7.67986e-05	0.00177					233.26	0.00145	0.00147	0.000333281	0.00011594
5.28	0.000161133	0.00178	7.63978e-05	0.00177					233.28	0.00139	0.00143	0.000365937	0.00012984
5.3	0.000160647	0.00178	7.59953e-05	0.00178					233.3	0.00139	0.0014	0.000362969	0.00010156
5.32	0.000160206	0.00178	7.5593e-05	0.00178					233.32	0.00144	0.00151	0.000345469	7e-05
5.34	0.000159812	0.00178	7.51926e-05	0.00178					233.34	0.00138	0.00148	0.000374375	0.00017688
5.36	0.000159461	0.00177	7.47958e-05	0.00178					233.36	0.00139	0.00144	0.000359531	9.672e-05
5.38	0.000159155	0.00177	7.44043e-05	0.00178					233.38	0.00147	0.00145	0.000349219	0.00010469
5.4	0.00015889	0.00177	7.40195e-05	0.00178					233.4	0.00146	0.00149	0.000395938	0.00014813
5.42	0.000158665	0.00177	7.36429e-05	0.00178					233.42	0.00141	0.00149	0.000354531	0.00013313
5.44	0.000158478	0.00177	7.32756e-05	0.00178					233.44	0.00139	0.00147	0.000312656	0.00012016
5.46	0.000158326	0.00177	7.29187e-05	0.00178					233.46	0.00143	0.00141	0.000366875	0.00014859
5.48	0.000158208	0.00177	7.25732e-05	0.00178					233.48	0.00142	0.00148	0.000345	0.00012656
5.5	0.000158121	0.00177	7.22399e-05	0.00178					233.5	0.00142	0.00152	0.000319844	0.0001025
5.52	0.000158061	0.00177	7.19193e-05	0.00178					233.52	0.00141	0.00148	0.000372969	0.00015563
5.54	0.000158027	0.00177	7.1612e-05	0.00178					233.54	0.00138	0.00147	0.000372969	0.00016844
5.56	0.000158015	0.00176	7.13183e-05	0.00178					233.56	0.0014	0.0015	0.00032875	0.00012344
5.58	0.000158022	0.00176	7.10383e-05	0.00178					233.58	0.0014	0.00147	0.000345937	9.453e-05
5.6	0.000158045	0.00176	7.07721e-05	0.00178					233.6	0.00142	0.00147	0.000390469	0.00012594
5.62	0.000158081	0.00176	7.05196e-05	0.00178					233.62	0.00143	0.00144	0.000376406	0.00011625
5.64	0.000158128	0.00176	7.02806e-05	0.00179					233.64	0.00141	0.00145	0.000350938	0.00012938
5.66	0.000158183	0.00176	7.00548e-05	0.00179					233.66	0.00139	0.00149	0.00033625	8.844e-05
5.68	0.000158242	0.00176	6.98419e-05	0.00179					233.68	0.0014	0.00147	0.000373125	9.906e-05
5.7	0.000158304	0.00176	6.96414e-05	0.00179					233.7	0.00143	0.00144	0.000374844	0.00013156
5.72	0.000158365	0.00176	6.94528e-05	0.00179					233.72	0.00141	0.00145	0.000355625	0.00012641
5.74	0.000158423	0.00176	6.92757e-05	0.00179					233.74	0.00143	0.00144	0.000365156	7.25e-05
5.76	0.000158477	0.00176	6.91095e-05	0.00179					233.76	0.00143	0.00142	0.000416875	6.547e-05
5.78	0.000158523	0.00176	6.89538e-05	0.00179					233.78	0.00144	0.00143	0.00036375	0.00013422
5.8	0.00015856	0.00176	6.88079e-05	0.00179					233.8	0.00143	0.00143	0.000334062	9.641e-05
5.82	0.000158585	0.00176	6.86715e-05	0.00179					233.82	0.00141	0.00141	0.000358125	0.00013359
5.84	0.000158599	0.00176	6.85441e-05	0.00179					233.84	0.0014	0.00141	0.000397188	0.00012234
5.86	0.000158597	0.00176	6.84252e-05	0.00179					233.86	0.00144	0.00142	0.000374062	9.797e-05
5.88	0.000158581	0.00176	6.83147e-05	0.00179					233.88	0.00141	0.00151	0.000364844	9.391e-05
5.9	0.000158547	0.00176	6.82123e-05	0.00179					233.9	0.00139	0.00143	0.000412969	8.75e-05
5.92	0.000158495	0.00176	6.81177e-05	0.00179					233.92	0.00141	0.00145	0.000383438	0.00013719
5.94	0.000158424	0.00176	6.80309e-05	0.00179					233.94	0.00145	0.00151	0.000368125	0.00013391
5.96	0.000158333	0.00176	6.79518e-05	0.00179					233.96	0.00141	0.00149	0.000350469	0.00011734
5.98	0.00015822	0.00176	6.78804e-05	0.00179					233.98	0.0014	0.00142	0.000412344	0.00013094
6	0.000158086	0.00176	6.78169e-05	0.00179					234	0.00144	0.00149	0.000352812	0.00013953
6.02	0.000157929	0.00176	6.77614e-05	0.00179					234.02	0.00144	0.00147	0.000330938	0.00011328
6.04	0.000157749	0.00176	6.7714e-05	0.00179					234.04	0.0014	0.0015	0.000377813	0.00011328
6.06	0.000157545	0.00176	6.7675e-05	0.00179					234.06	0.00144	0.00145	0.000411875	0.00015
6.08	0.000157316	0.00176	6.76447e-05	0.00179					234.08	0.00143	0.00148	0.000347656	9.156e-05
6.1	0.000157061	0.00176	6.76232e-05	0.00178					234.1	0.00142	0.00148	0.000309531	7e-05
6.12	0.000156781	0.00176	6.7611e-05	0.00178					234.12	0.00144	0.00147	0.000359688	0.00013
6.14	0.000156474	0.00176	6.7608e-05	0.00178					234.14	0.00143	0.00142	0.000385469	0.000105
6.16	0.00015614	0.00176	6.76146e-05	0.00178					234.16	0.00142	0.00143	0.000297656	0.00012984
6.18	0.000155779	0.00176	6.7631e-05	0.00178					234.18	0.00145	0.00147	0.000329688	0.000105
6.2	0.00015539	0.00176	6.7657e-05	0.00178					234.2	0.00144	0.00142	0.000353594	9.531e-05
6.22	0.000154972	0.00176	6.76928e-05	0.00178					234.22	0.00142	0.00145	0.000393906	0.00011406
6.24	0.000154526	0.00176	6.77383e-05	0.00178					234.24	0.0014	0.00145	0.000329688	0.00012625
6.26	0.000154051	0.00176	6.77931e-05	0.00178					234.26	0.00139	0.00142	0.000343281	9.734e-05
6.28	0.000153548	0.00176	6.78571e-05	0.00178					234.28	0.00141	0.00142	0.000368125	0.00013859
6.3	0.000153015	0.00176	6.79297e-05	0.00178					234.3	0.0014	0.00142	0.00042	0.00011953
6.32	0.000152454	0.00176	6.80103e-05	0.00178					234.32	0.00144	0.00144	0.000366719	0.00013516
6.34	0.000151864	0.00176	6.80983e-05	0.00178					234.34	0.00144	0.00142	0.00037	0.0001
6.36	0.000151247	0.00177	6.81927e-05	0.00178					234.36	0.00136	0.00146	0.000385781	0.00015391
6.38	0.000150601	0.00177	6.82927e-05	0.00178					234.38	0.00141	0.00146	0.000411406	0.00017641
6.4	0.00014993	0.00177	6.8397e-05	0.00178					234.4	0.00143	0.00142	0.000363594	0.00011172
6.42	0.000149232	0.00177	6.85044e-05	0.00178					234.42	0.00137	0.00149	0.0003775	0.00012625
6.44	0.000148511	0.00177	6.86137e-05	0.00177					234.44	0.00141	0.00147	0.00039	0.00016578
6.46	0.000147766	0.00177	6.87232e-05	0.00177					234.46	0.00144	0.00147	0.0003575	0.00015547
6.48	0.000147001	0.00177	6.88316e-05	0.00177					234.48	0.00141	0.00149	0.000343594	0.00015688
6.5	0.000146215	0.00177	6.89372e-05	0.00177					234.5	0.00142	0.00148	0.000350156	0.00015031
6.52	0.000145413	0.00177	6.90382e-05	0.00177					234.52	0.00145	0.00145	0.000352031	0.00015313
6.54	0.000144595	0.00177	6.91331e-05	0.00177					234.54	0.00144	0.0015	0.000346875	0.00012203
6.56	0.000143765	0.00177	6.92201e-05	0.00177					234.56	0.00142	0.00152	0.000348125	0.000135
6.58	0.000142925	0.00177	6.92974e-05	0.00177					234.58	0.00144	0.00145	0.000322344	0.00015828
6.6	0.000142078	0.00177	6.93634e-05	0.00177					234.6	0.00143	0.00148	0.000367813	9.078e-05
6.62	0.000141227	0.00177	6.94165e-05	0.00177					234.62	0.00141	0.0015	0.000334844	0.00012234
6.64	0.000140375	0.00177	6.9455e-05	0.00177					234.64	0.00142	0.00149	0.000335312	0.00012734
6.66	0.000139525	0.00177	6.94775e-05	0.00177					234.66	0.00144	0.00146	0.000328281	0.00014563
6.68	0.000138681	0.00177	6.94827e-05	0.00177					234.68	0.00143	0.00146	0.000369063	0.00012391
6.7	0.000137845	0.00177	6.94693e-05	0.00177					234.7	0.0014	0.00146	0.000378906	0.00017906
6.72	0.000137021	0.00177	6.94362e-05	0.00177					234.72	0.00142	0.00144	0.000302656	0.00014313
6.74	0.000136212	0.00177	6.93825e-05	0.00177					234.74	0.00145	0.00143	0.000345	0.00012734
6.76	0.000135422	0.00177	6.93076e-05	0.00177					234.76	0.00143	0.00145	0.000390938	0.00012891
6.78	0.000134653	0.00177	6.92108e-05	0.00177					234.78	0.00138	0.00147	0.000368125	0.0001475
6.8	0.000133908	0.00177	6.90918e-05	0.00177					234.8	0.00137	0.00146	0.000339375	0.000115
6.82	0.000133191	0.00177	6.89506e-05	0.00177					234.82	0.00142	0.00148	0.000380469	0.00014594
6.84	0.000132504	0.00177	6.87872e-05	0.00177					234.84	0.00142	0.00145	0.000368906	0.00012234
6.86	0.000131848	0.00177	6.86019e-05	0.00177					234.86	0.00142	0.00149	0.000340313	0.00015
6.88	0.000131227	0.00177	6.83952e-05	0.00177					234.88	0.00142	0.00144	0.000336563	0.00011859
6.9	0.000130642	0.00177	6.81679e-05	0.00177					234.9	0.00144	0.00144	0.000380781	0.00013859
6.92	0.000130095	0.00177	6.7921e-05	0.00177					234.92	0.00142	0.00146	0.00036125	0.00015031
6.94	0.000129586	0.00177	6.76555e-05	0.00177					234.94	0.00142	0.0015	0.000331562	0.00011031
6.96	0.000129118	0.00177	6.73727e-05	0.00177					234.96	0.00144	0.00147	0.000350156	0.00013734
6.98	0.00012869	0.00177	6.70742e-05	0.00177					234.98	0.00142	0.00144	0.000329375	0.00014641
7	0.000128303	0.00177	6.67616e-05	0.00178					235	0.00141	0.00149	0.000342813	0.00011938
7.02	0.000127958	0.00177	6.64366e-05	0.00178					235.02	0.00145	0.00149	0.000366719	0.00010484
7.04	0.000127653	0.00177	6.61011e-05	0.00178					235.04	0.00147	0.00149	0.000357656	0.00011344
7.06	0.000127388	0.00177	6.57571e-05	0.00178					235.06	0.0014	0.00147	0.0003325	0.00012516
7.08	0.000127162	0.00177	6.54066e-05	0.00178					235.08	0.00143	0.00146	0.000345625	0.00011844
7.1	0.000126975	0.00177	6.50517e-05	0.00178					235.1	0.00145	0.00146	0.000356875	0.00011078
7.12	0.000126824	0.00177	6.46944e-05	0.00178					235.12	0.00142	0.00149	0.000380156	0.00011109
7.14	0.000126709	0.00176	6.4337e-05	0.00178					235.14	0.00141	0.00146	0.000367031	0.00014328
7.16	0.000126627	0.00176	6.39815e-05	0.00178					235.16	0.00144	0.00148	0.000357969	9.156e-05
7.18	0.000126576	0.00176	6.36299e-05	0.00178					235.18	0.00147	0.00146	0.000400469	0.00011906
7.2	0.000126554	0.00176	6.32842e-05	0.00178					235.2	0.00141	0.00147	0.000379219	0.00015578
7.22	0.00012656	0.00176	6.29463e-05	0.00178					235.22	0.00142	0.00148	0.000360938	0.00010266
7.24	0.000126589	0.00176	6.26179e-05	0.00178					235.24	0.00144	0.00143	0.000379844	0.0001075
7.26	0.000126641	0.00176	6.23009e-05	0.00178					235.26	0.00147	0.00147	0.000356406	0.00011703
7.28	0.000126712	0.00176	6.19966e-05	0.00178					235.28	0.00147	0.00146	0.00036	0.00015734
7.3	0.000126799	0.00176	6.17066e-05	0.00179					235.3	0.0014	0.00146	0.000369688	0.00013313
7.32	0.000126901	0.00176	6.14321e-05	0.00179					235.32	0.00142	0.00147	0.000389531	8.516e-05
7.34	0.000127015	0.00176	6.11741e-05	0.00179					235.34	0.00146	0.00149	0.000382813	0.00011656
7.36	0.000127138	0.00176	6.09335e-05	0.00179					235.36	0.00145	0.00147	0.000304375	0.00012047
7.38	0.000127268	0.00176	6.07112e-05	0.00179					235.38	0.00143	0.00142	0.00038375	0.00010422
7.4	0.000127401	0.00176	6.05078e-05	0.00179					235.4	0.00145	0.00148	0.000409375	8.875e-05
7.42	0.000127537	0.00176	6.03236e-05	0.00179					235.42	0.00146	0.00147	0.000316719	0.00016188
7.44	0.000127673	0.00176	6.01588e-05	0.00179					235.44	0.00144	0.00147	0.00031625	0.00010422
7.46	0.000127806	0.00176	6.00137e-05	0.00179					235.46	0.00143	0.00145	0.000391406	8.391e-05
7.48	0.000127934	0.00175	5.98881e-05	0.00179					235.48	0.00145	0.00146	0.000391719	0.00012875
7.5	0.000128056	0.00175	5.97819e-05	0.00179					235.5	0.00144	0.00148	0.000300938	0.00014797
7.52	0.00012817	0.00175	5.96946e-05	0.00179					235.52	0.00141	0.00145	0.000357188	0.000115
7.54	0.000128273	0.00175	5.9626e-05	0.00179					235.54	0.00143	0.00148	0.00040625	0.00010859
7.56	0.000128365	0.00175	5.95753e-05	0.00179					235.56	0.00147	0.00148	0.000392656	9.219e-05
7.58	0.000128444	0.00175	5.9542e-05	0.00179					235.58	0.00142	0.00145	0.000373125	9.859e-05
7.6	0.000128508	0.00175	5.95253e-05	0.00179					235.6	0.00142	0.00146	0.000371406	0.00013016
7.62	0.000128556	0.00175	5.95243e-05	0.00179					235.62	0.00145	0.00146	0.000402813	0.00014328
7.64	0.000128586	0.00175	5.95383e-05	0.00179					235.64	0.00145	0.00148	0.000431719	9.5e-05
7.66	0.000128598	0.00175	5.95664e-05	0.00178					235.66	0.00142	0.00142	0.000347344	0.00014719
7.68	0.000128591	0.00175	5.96075e-05	0.00178					235.68	0.00143	0.00145	0.0003925	0.00011219
7.7	0.000128563	0.00175	5.96607e-05	0.00178					235.7	0.00147	0.00148	0.000398594	7.547e-05
7.72	0.000128513	0.00175	5.9725e-05	0.00178					235.72	0.00145	0.00147	0.00038625	0.00012594
7.74	0.000128441	0.00175	5.97995e-05	0.00178					235.74	0.00144	0.00144	0.00038	0.00012141
7.76	0.000128346	0.00175	5.98832e-05	0.00178					235.76	0.00145	0.00145	0.000374062	0.00010656
7.78	0.000128226	0.00175	5.99751e-05	0.00178					235.78	0.00146	0.00148	0.000385313	8.109e-05
7.8	0.000128082	0.00175	6.00744e-05	0.00178					235.8	0.0015	0.0014	0.000329531	0.00014828
7.82	0.000127912	0.00175	6.018e-05	0.00178					235.82	0.00148	0.00141	0.000360469	0.00011813
7.84	0.000127717	0.00175	6.02912e-05	0.00178					235.84	0.00141	0.00148	0.000383594	5.109e-05
7.86	0.000127495	0.00175	6.04071e-05	0.00178					235.86	0.00145	0.00149	0.000367031	0.0001475
7.88	0.000127247	0.00176	6.05268e-05	0.00178					235.88	0.00146	0.00145	0.000324375	0.00013766
7.9	0.000126972	0.00176	6.06496e-05	0.00178					235.9	0.00142	0.00147	0.000387187	7.016e-05
7.92	0.000126671	0.00176	6.07747e-05	0.00178					235.92	0.0014	0.00152	0.000407969	8.281e-05
7.94	0.000126342	0.00176	6.09014e-05	0.00178					235.94	0.00143	0.00147	0.000350156	0.00014375
7.96	0.000125987	0.00176	6.1029e-05	0.00178					235.96	0.00144	0.00143	0.000332031	0.00016547
7.98	0.000125606	0.00176	6.11568e-05	0.00178					235.98	0.0014	0.00151	0.000394844	9.141e-05
8	0.000125199	0.00176	6.12841e-05	0.00178					236	0.00141	0.0015	0.000397656	0.00013594
8.02	0.000124767	0.00176	6.14103e-05	0.00178					236.02	0.00144	0.00146	0.000315313	0.00017828
8.04	0.000124311	0.00176	6.15347e-05	0.00178					236.04	0.0014	0.00146	0.000324063	0.00014531
8.06	0.000123832	0.00176	6.16567e-05	0.00177					236.06	0.00142	0.00149	0.000381406	0.0001575
8.08	0.000123331	0.00176	6.17757e-05	0.00177					236.08	0.00137	0.00146	0.000375156	0.00011375
8.1	0.000122809	0.00176	6.1891e-05	0.00177					236.1	0.00145	0.00149	0.000334531	0.00014469
8.12	0.000122268	0.00176	6.20019e-05	0.00177					236.12	0.00144	0.00146	0.000363125	0.00017906
8.14	0.000121709	0.00176	6.21078e-05	0.00177					236.14	0.00144	0.00143	0.000360625	0.00015984
8.16	0.000121136	0.00176	6.22081e-05	0.00177					236.16	0.00143	0.00147	0.00035875	0.0001225
8.18	0.000120549	0.00176	6.23021e-05	0.00177					236.18	0.00147	0.00144	0.000328125	0.00013906
8.2	0.000119951	0.00176	6.23891e-05	0.00177					236.2	0.00149	0.00145	0.000370469	0.00015938
8.22	0.000119344	0.00177	6.24686e-05	0.00177					236.22	0.00144	0.00144	0.0003525	0.00014516
8.24	0.000118731	0.00177	6.25397e-05	0.00177					236.24	0.00147	0.00147	0.000341719	0.00010063
8.26	0.000118115	0.00177	6.26019e-05	0.00177					236.26	0.00148	0.00148	0.000364531	0.000125
8.28	0.000117498	0.00177	6.26545e-05	0.00177					236.28	0.00146	0.00148	0.000429375	0.00015453
8.3	0.000116882	0.00177	6.2697e-05	0.00177					236.3	0.00144	0.00144	0.000371563	8.297e-05
8.32	0.000116272	0.00177	6.27287e-05	0.00177					236.32	0.00145	0.00145	0.000356719	9.594e-05
8.34	0.000115669	0.00177	6.27491e-05	0.00177					236.34	0.00148	0.00148	0.000392188	0.00014094
8.36	0.000115076	0.00177	6.27578e-05	0.00177					236.36	0.00147	0.00149	0.000403125	0.00011578
8.38	0.000114496	0.00177	6.27541e-05	0.00177					236.38	0.00141	0.00145	0.000381094	9.641e-05
8.4	0.000113932	0.00177	6.27379e-05	0.00177					236.4	0.00141	0.00149	0.000368594	0.00012984
8.42	0.000113386	0.00177	6.27087e-05	0.00177					236.42	0.00145	0.00153	0.000380625	0.00013531
8.44	0.00011286	0.00177	6.26663e-05	0.00177					236.44	0.00142	0.00153	0.000378125	0.00015281
8.46	0.000112358	0.00177	6.26107e-05	0.00177					236.46	0.00138	0.00146	0.000362656	0.00013391
8.48	0.00011188	0.00177	6.25417e-05	0.00177					236.48	0.00142	0.00148	0.000346719	0.00015234
8.5	0.000111429	0.00176	6.24595e-05	0.00177					236.5	0.00144	0.00148	0.000315938	0.00013203
8.52	0.000111007	0.00176	6.23641e-05	0.00177					236.52	0.00143	0.00147	0.000359531	0.00017328
8.54	0.000110615	0.00176	6.22561e-05	0.00177					236.54	0.00142	0.00144	0.000308281	0.00017563
8.56	0.000110253	0.00176	6.21356e-05	0.00178					236.56	0.00144	0.00145	0.000295625	0.00014516
8.58	0.000109924	0.00176	6.20033e-05	0.00178					236.58	0.00143	0.00151	0.000344844	0.00017391
8.6	0.000109628	0.00176	6.18599e-05	0.00178					236.6	0.00142	0.00145	0.0003475	0.00014234
8.62	0.000109364	0.00176	6.1706e-05	0.00178					236.62	0.00143	0.00143	0.0003125	0.0001225
8.64	0.000109133	0.00176	6.15427e-05	0.00178					236.64	0.00145	0.00145	0.000304219	0.00015438
8.66	0.000108935	0.00176	6.13708e-05	0.00178					236.66	0.00145	0.00145	0.000369219	0.00014859
8.68	0.00010877	0.00176	6.11915e-05	0.00178					236.68	0.00143	0.00145	0.000409219	0.00012063
8.7	0.000108636	0.00176	6.10059e-05	0.00178					236.7	0.00144	0.00145	0.000311406	0.00012219
8.72	0.000108532	0.00176	6.08153e-05	0.00178					236.72	0.00146	0.00144	0.000351719	0.00016047
8.74	0.000108458	0.00176	6.06211e-05	0.00178					236.74	0.00149	0.00147	0.00043375	7.328e-05
8.76	0.000108412	0.00176	6.04246e-05	0.00178					236.76	0.00141	0.00145	0.000393281	6.063e-05
8.78	0.000108393	0.00176	6.02272e-05	0.00178					236.78	0.00146	0.00147	0.000352656	0.00014109
8.8	0.000108397	0.00175	6.00304e-05	0.00178					236.8	0.00148	0.00151	0.000406875	9.703e-05
8.82	0.000108425	0.00175	5.98356e-05	0.00178					236.82	0.00146	0.00148	0.000389219	4.094e-05
8.84	0.000108472	0.00175	5.96443e-05	0.00178					236.84	0.00144	0.00147	0.000418594	0.0001075
8.86	0.000108538	0.00175	5.94578e-05	0.00178					236.86	0.00148	0.00146	0.000344844	9.859e-05
8.88	0.00010862	0.00175	5.92775e-05	0.00178					236.88	0.00149	0.0015	0.000380938	7.094e-05
8.9	0.000108716	0.00175	5.91046e-05	0.00178					236.9	0.00143	0.00145	0.000444219	0.00011859
8.92	0.000108822	0.00175	5.89404e-05	0.00178					236.92	0.00146	0.00146	0.000392344	0.00014156
8.94	0.000108938	0.00175	5.8786e-05	0.00178					236.94	0.00147	0.00149	0.000334531	0.00010969
8.96	0.000109061	0.00175	5.86423e-05	0.00178					236.96	0.00144	0.00149	0.0003875	0.00011844
8.98	0.000109188	0.00175	5.85102e-05	0.00178					236.98	0.00144	0.00147	0.000406875	0.00010406
9	0.000109317	0.00175	5.83904e-05	0.00179					237	0.00141	0.00141	0.000366563	0.00013031
9.02	0.000109446	0.00175	5.82834e-05	0.00179					237.02	0.00144	0.00148	0.000334531	0.00013359
9.04	0.000109574	0.00175	5.81898e-05	0.00179					237.04	0.00144	0.00148	0.000364687	0.00011844
9.06	0.000109698	0.00175	5.81097e-05	0.00179					237.06	0.00145	0.00144	0.000358906	0.00015578
9.08	0.000109816	0.00175	5.80432e-05	0.00179					237.08	0.00146	0.00143	0.000354062	0.00014
9.1	0.000109927	0.00175	5.79902e-05	0.00179					237.1	0.00143	0.00145	0.000330156	0.00015578
9.12	0.00011003	0.00175	5.79505e-05	0.00179					237.12	0.0014	0.00147	0.000380313	0.0001575
9.14	0.000110122	0.00175	5.79237e-05	0.00179					237.14	0.00142	0.00146	0.000353438	0.00013281
9.16	0.000110204	0.00175	5.79092e-05	0.00179					237.16	0.00148	0.00145	0.0003475	0.00012109
9.18	0.000110273	0.00175	5.79064e-05	0.00179					237.18	0.00145	0.00149	0.0003975	0.00010797
9.2	0.000110329	0.00175	5.79143e-05	0.00179					237.2	0.00139	0.00149	0.000366406	0.00011422
9.22	0.000110372	0.00175	5.7932e-05	0.00179					237.22	0.00148	0.00148	0.000338438	0.00011906
9.24	0.0001104	0.00175	5.79585e-05	0.00179					237.24	0.00149	0.00148	0.000386563	9.406e-05
9.26	0.000110414	0.00175	5.79927e-05	0.00179					237.26	0.00146	0.00147	0.000392656	0.00010563
9.28	0.000110412	0.00175	5.80332e-05	0.00178					237.28	0.00144	0.00146	0.000362656	0.00014375
9.3	0.000110394	0.00175	5.8079e-05	0.00178					237.3	0.00145	0.00144	0.000339375	0.0001275
9.32	0.000110361	0.00175	5.81285e-05	0.00178					237.32	0.00149	0.00147	0.000425938	4.844e-05
9.34	0.000110312	0.00175	5.81806e-05	0.00178					237.34	0.00147	0.0015	0.000400156	0.00014453
9.36	0.000110247	0.00175	5.8234e-05	0.00178					237.36	0.00146	0.00145	0.000369531	0.00010969
9.38	0.000110166	0.00175	5.82873e-05	0.00178					237.38	0.0015	0.00148	0.000377656	7.609e-05
9.4	0.000110069	0.00175	5.83393e-05	0.00178					237.4	0.00147	0.00147	0.000405156	7.594e-05
9.42	0.000109957	0.00175	5.83889e-05	0.00178					237.42	0.00147	0.00147	0.000412344	0.00013766
9.44	0.000109829	0.00175	5.84351e-05	0.00178					237.44	0.00144	0.00138	0.000383594	0.00015063
9.46	0.000109686	0.00175	5.84767e-05	0.00178					237.46	0.00145	0.00143	0.000378125	8.969e-05
9.48	0.000109527	0.00175	5.85129e-05	0.00178					237.48	0.00148	0.00149	0.0004425	6.719e-05
9.5	0.000109354	0.00175	5.8543e-05	0.00178					237.5	0.00145	0.00145	0.0004	0.00012781
9.52	0.000109166	0.00175	5.85663e-05	0.00178					237.52	0.00145	0.00143	0.000364375	0.00013781
9.54	0.000108963	0.00175	5.85823e-05	0.00178					237.54	0.00143	0.0015	0.000399688	8.313e-05
9.56	0.000108746	0.00175	5.85906e-05	0.00178					237.56	0.00142	0.00149	0.000412813	0.00011469
9.58	0.000108514	0.00176	5.85911e-05	0.00178					237.58	0.00145	0.00144	0.000345781	9.547e-05
9.6	0.000108268	0.00176	5.85836e-05	0.00178					237.6	0.00146	0.00146	0.000327656	0.00013484
9.62	0.000108009	0.00176	5.85681e-05	0.00178					237.62	0.00144	0.00148	0.000410313	0.00017703
9.64	0.000107735	0.00176	5.85449e-05	0.00178					237.64	0.00142	0.00147	0.000362344	0.00010609
9.66	0.000107448	0.00176	5.85142e-05	0.00178					237.66	0.00144	0.00149	0.000321094	0.00010375
9.68	0.000107148	0.00176	5.84764e-05	0.00178					237.68	0.00146	0.00151	0.000339375	0.0001425
9.7	0.000106834	0.00176	5.84319e-05	0.00178					237.7	0.00141	0.00148	0.000367031	0.00013109
9.72	0.000106507	0.00176	5.83814e-05	0.00178					237.72	0.00144	0.00147	0.000337813	0.00014359
9.74	0.000106168	0.00176	5.83255e-05	0.00177					237.74	0.00147	0.00147	0.000316875	0.00016203
9.76	0.000105815	0.00176	5.82648e-05	0.00177					237.76	0.00147	0.00151	0.000327188	0.00016984
9.78	0.000105451	0.00176	5.82001e-05	0.00177					237.78	0.00147	0.00144	0.000373438	0.0001525
9.8	0.000105075	0.00176	5.8132e-05	0.00177					237.8	0.00149	0.00146	0.000349531	0.00013688
9.82	0.000104687	0.00176	5.80613e-05	0.00177					237.82	0.00152	0.00146	0.000329375	0.00015688
9.84	0.000104288	0.00176	5.79887e-05	0.00177					237.84	0.00145	0.00146	0.000357188	0.00017859
9.86	0.000103878	0.00176	5.79148e-05	0.00177					237.86	0.00146	0.00148	0.000363125	0.00014219
9.88	0.000103459	0.00176	5.78401e-05	0.00177					237.88	0.00149	0.00145	0.000391406	0.00013422
9.9	0.00010303	0.00176	5.77653e-05	0.00177					237.9	0.00144	0.00146	0.000397031	0.00013109
9.92	0.000102593	0.00176	5.76906e-05	0.00177					237.92	0.00147	0.00146	0.000393438	0.00012172
9.94	0.000102148	0.00176	5.76165e-05	0.00177					237.94	0.00147	0.00149	0.000390781	0.00010375
9.96	0.000101696	0.00176	5.75432e-05	0.00177					237.96	0.00146	0.00144	0.000434219	0.00013688
9.98	0.000101238	0.00176	5.74707e-05	0.00177					237.98	0.00144	0.00144	0.000378594	0.0001425
10	0.000100775	0.00176	5.73991e-05	0.00177					238	0.00144	0.00147	0.000383594	0.00011563
10.02	0.000100308	0.00176	5.73282e-05	0.00177					238.02	0.00147	0.00149	0.00043	0.00011
10.04	9.98382e-05	0.00176	5.72577e-05	0.00177					238.04	0.00146	0.00145	0.000360781	0.00010844
10.06	9.93674e-05	0.00176	5.71873e-05	0.00177					238.06	0.00143	0.00149	0.000367188	0.00012125
10.08	9.88965e-05	0.00176	5.71165e-05	0.00177					238.08	0.00144	0.00152	0.000440469	0.00016828
10.1	9.8427e-05	0.00176	5.70446e-05	0.00177					238.1	0.00145	0.00151	0.000388594	0.00011125
10.12	9.79603e-05	0.00176	5.69711e-05	0.00177					238.12	0.00147	0.00147	0.000312344	9.422e-05
10.14	9.7498e-05	0.00176	5.68951e-05	0.00177					238.14	0.00142	0.00145	0.000357344	0.00011469
10.16	9.70415e-05	0.00176	5.68157e-05	0.00177					238.16	0.00144	0.00149	0.000387344	0.00015766
10.18	9.65926e-05	0.00176	5.67322e-05	0.00177					238.18	0.00148	0.0015	0.000307969	9.797e-05
10.2	9.61527e-05	0.00176	5.66435e-05	0.00177					238.2	0.00145	0.00146	0.000317656	0.00010688
10.22	9.57237e-05	0.00176	5.65487e-05	0.00177					238.22	0.00144	0.00146	0.00035375	0.00017531
10.24	9.5307e-05	0.00176	5.64469e-05	0.00177					238.24	0.00144	0.00152	0.000351875	0.00014578
10.26	9.49045e-05	0.00176	5.63371e-05	0.00177					238.26	0.00144	0.0015	0.000299375	9.016e-05
10.28	9.45178e-05	0.00176	5.62185e-05	0.00177					238.28	0.00145	0.00144	0.00032875	0.0001675
10.3	9.41484e-05	0.00176	5.60903e-05	0.00177					238.3	0.00145	0.00145	0.000387031	0.00014547
10.32	9.3798e-05	0.00176	5.59516e-05	0.00177					238.32	0.00148	0.0015	0.000341563	0.00016922
10.34	9.34682e-05	0.00175	5.5802e-05	0.00177					238.34	0.00148	0.00141	0.000337656	0.00013781
10.36	9.31605e-05	0.00175	5.56408e-05	0.00177					238.36	0.00144	0.00144	0.000378125	0.00014016
10.38	9.28763e-05	0.00175	5.54677e-05	0.00177					238.38	0.00144	0.00148	0.000361563	0.00017797
10.4	9.26169e-05	0.00175	5.52825e-05	0.00177					238.4	0.00145	0.00144	0.00040875	9.422e-05
10.42	9.23836e-05	0.00175	5.5085e-05	0.00177					238.42	0.00146	0.00149	0.000372656	0.00014625
10.44	9.21775e-05	0.00175	5.48753e-05	0.00177					238.44	0.00141	0.00148	0.000388594	0.00014125
10.46	9.19997e-05	0.00175	5.46538e-05	0.00178					238.46	0.00145	0.00146	0.000394531	0.00012031
10.48	9.1851e-05	0.00175	5.44207e-05	0.00178					238.48	0.00149	0.00149	0.000415	8.297e-05
10.5	9.17323e-05	0.00175	5.41767e-05	0.00178					238.5	0.00143	0.00147	0.000402188	0.0001075
10.52	9.1644e-05	0.00175	5.39227e-05	0.00178					238.52	0.00142	0.00148	0.000349375	0.00014641
10.54	9.15866e-05	0.00175	5.36595e-05	0.00178					238.54	0.00151	0.00142	0.000365625	8.188e-05
10.56	9.15603e-05	0.00175	5.33882e-05	0.00178					238.56	0.0015	0.00147	0.000392188	8.656e-05
10.58	9.15651e-05	0.00175	5.31103e-05	0.00178					238.58	0.00143	0.00153	0.000362188	0.00010859
10.6	9.16009e-05	0.00174	5.2827e-05	0.00178					238.6	0.00146	0.00147	0.0003375	0.00013844
10.62	9.16673e-05	0.00174	5.25399e-05	0.00178					238.62	0.00149	0.00147	0.000398906	9.719e-05
10.64	9.17638e-05	0.00174	5.22508e-05	0.00178					238.64	0.00148	0.00153	0.000382188	8.016e-05
10.66	9.18894e-05	0.00174	5.19614e-05	0.00178					238.66	0.00144	0.00148	0.00030875	0.00010313
10.68	9.20432e-05	0.00174	5.16735e-05	0.00178					238.68	0.00147	0.00144	0.000376094	0.00015375
10.7	9.22238e-05	0.00174	5.13892e-05	0.00178					238.7	0.00148	0.00148	0.000399531	0.00012813
10.72	9.243e-05	0.00174	5.11103e-05	0.00178					238.72	0.00146	0.0015	0.000387656	4.766e-05
10.74	9.26598e-05	0.00174	5.08389e-05	0.00178					238.74	0.00142	0.00144	0.000372188	0.00011297
10.76	9.29114e-05	0.00174	5.05769e-05	0.00178					238.76	0.00145	0.00148	0.000406875	0.00017813
10.78	9.31827e-05	0.00174	5.03264e-05	0.00178					238.78	0.00146	0.00148	0.000392344	0.00013234
10.8	9.34714e-05	0.00174	5.00893e-05	0.00178					238.8	0.00139	0.0015	0.000375312	0.00012469
10.82	9.37749e-05	0.00174	4.98674e-05	0.00178					238.82	0.00142	0.00144	0.000391875	0.00011547
10.84	9.40906e-05	0.00174	4.96625e-05	0.00178					238.84	0.00148	0.00146	0.000419063	0.00014172
10.86	9.44155e-05	0.00174	4.94764e-05	0.00178					238.86	0.00148	0.00147	0.000355938	7.938e-05
10.88	9.47469e-05	0.00174	4.93105e-05	0.00178					238.88	0.00141	0.00147	0.00036375	0.00012156
10.9	9.50815e-05	0.00174	4.91664e-05	0.00178					238.9	0.00144	0.00145	0.000381563	0.000155
10.92	9.54162e-05	0.00174	4.90454e-05	0.00178					238.92	0.00151	0.00148	0.000380156	0.00011484
10.94	9.57477e-05	0.00174	4.89485e-05	0.00178					238.94	0.00145	0.00146	0.000371719	0.00010031
10.96	9.60728e-05	0.00174	4.88767e-05	0.00178					238.96	0.00143	0.00146	0.000414531	0.00014375
10.98	9.63882e-05	0.00174	4.88307e-05	0.00178					238.98	0.00149	0.00145	0.000305156	9.547e-05
11	9.66906e-05	0.00174	4.88113e-05	0.00178					239	0.00154	0.00146	0.000388594	7.156e-05
11.02	9.69769e-05	0.00174	4.88188e-05	0.00178					239.02	0.00145	0.00151	0.0004525	9.938e-05
11.04	9.72438e-05	0.00174	4.88533e-05	0.00178					239.04	0.00147	0.00144	0.000345156	0.00010406
11.06	9.74883e-05	0.00174	4.89149e-05	0.00178					239.06	0.00153	0.00146	0.000323281	0.00011797
11.08	9.77077e-05	0.00174	4.90034e-05	0.00178					239.08	0.00151	0.00147	0.000393594	7.922e-05
11.1	9.78991e-05	0.00174	4.91185e-05	0.00178					239.1	0.00146	0.0015	0.000417031	8.594e-05
11.12	9.80601e-05	0.00174	4.92594e-05	0.00178					239.12	0.00146	0.00146	0.000346094	0.00015156
11.14	9.81884e-05	0.00174	4.94256e-05	0.00178					239.14	0.00147	0.00146	0.000342187	0.00013391
11.16	9.82819e-05	0.00175	4.9616e-05	0.00178					239.16	0.00144	0.00155	0.000469063	0.00010797
11.18	9.8339e-05	0.00175	4.98296e-05	0.00178					239.18	0.00143	0.0015	0.000421563	9.703e-05
11.2	9.83581e-05	0.00175	5.0065e-05	0.00178					239.2	0.00145	0.00149	0.000363125	0.00011406
11.22	9.83382e-05	0.00175	5.0321e-05	0.00178					239.22	0.00144	0.00149	0.000382188	0.00016984
11.24	9.82785e-05	0.00175	5.05958e-05	0.00178					239.24	0.00145	0.00149	0.000408438	0.00013641
11.26	9.81784e-05	0.00175	5.08879e-05	0.00178					239.26	0.00148	0.00146	0.000352812	0.00011219
11.28	9.80378e-05	0.00175	5.11954e-05	0.00178					239.28	0.00143	0.00149	0.000352344	0.00015156
11.3	9.7857e-05	0.00175	5.15164e-05	0.00178					239.3	0.00144	0.00144	0.00037875	0.00016469
11.32	9.76365e-05	0.00175	5.18489e-05	0.00178					239.32	0.00145	0.00146	0.000369688	0.00011594
11.34	9.73773e-05	0.00175	5.2191e-05	0.00178					239.34	0.00146	0.00146	0.000337344	0.00011625
11.36	9.70807e-05	0.00175	5.25403e-05	0.00178					239.36	0.00144	0.00144	0.000359688	0.00013922
11.38	9.67481e-05	0.00175	5.28948e-05	0.00178					239.38	0.00147	0.00145	0.000377813	0.00010875
11.4	9.63816e-05	0.00175	5.32522e-05	0.00178					239.4	0.00151	0.00143	0.000335	0.00013328
11.42	9.59832e-05	0.00176	5.36102e-05	0.00178					239.42	0.00148	0.00145	0.000284375	0.00012438
11.44	9.55555e-05	0.00176	5.39665e-05	0.00178					239.44	0.00148	0.00143	0.000410313	0.00012391
11.46	9.5101e-05	0.00176	5.4319e-05	0.00178					239.46	0.00151	0.00145	0.000407656	6.969e-05
11.48	9.46228e-05	0.00176	5.46652e-05	0.00178					239.48	0.00147	0.00147	0.000310625	0.00013516
11.5	9.41239e-05	0.00176	5.5003e-05	0.00178					239.5	0.00147	0.00146	0.000344219	0.00014813
11.52	9.36075e-05	0.00176	5.53302e-05	0.00178					239.52	0.00146	0.00146	0.000460781	0.00012188
11.54	9.30769e-05	0.00176	5.56446e-05	0.00178					239.54	0.00147	0.00148	0.0004	7.281e-05
11.56	9.25357e-05	0.00176	5.59442e-05	0.00178					239.56	0.00148	0.00151	0.000355312	0.00014625
11.58	9.19872e-05	0.00176	5.62268e-05	0.00178					239.58	0.00146	0.00149	0.000407187	0.00018609
11.6	9.1435e-05	0.00176	5.64905e-05	0.00178					239.6	0.00146	0.00144	0.000430469	0.00012063
11.62	9.08824e-05	0.00176	5.67336e-05	0.00178					239.62	0.00144	0.00147	0.000399063	8.313e-05
11.64	9.03329e-05	0.00176	5.69543e-05	0.00178					239.64	0.00147	0.00149	0.000340313	0.00017813
11.66	8.97899e-05	0.00176	5.71509e-05	0.00178					239.66	0.00143	0.00149	0.000398125	0.000185
11.68	8.92564e-05	0.00176	5.7322e-05	0.00178					239.68	0.00142	0.0015	0.000385937	0.00014625
11.7	8.87354e-05	0.00176	5.74662e-05	0.00178					239.7	0.00147	0.00148	0.000323281	0.00010828
11.72	8.82299e-05	0.00176	5.75824e-05	0.00178					239.72	0.00147	0.00152	0.000376562	0.00011531
11.74	8.77424e-05	0.00176	5.76696e-05	0.00178					239.74	0.00142	0.00148	0.00032875	0.00016172
11.76	8.72754e-05	0.00176	5.77268e-05	0.00178					239.76	0.00146	0.0015	0.000310156	0.0001625
11.78	8.68311e-05	0.00176	5.77535e-05	0.00178					239.78	0.00151	0.00146	0.000344844	0.00013172
11.8	8.64113e-05	0.00176	5.7749e-05	0.00178					239.8	0.00147	0.00143	0.000304219	0.00011141
11.82	8.60176e-05	0.00176	5.77133e-05	0.00178					239.82	0.00145	0.00147	0.000324687	0.00014781
11.84	8.56516e-05	0.00176	5.76461e-05	0.00178					239.84	0.00148	0.00144	0.000331562	0.00016719
11.86	8.53142e-05	0.00176	5.75475e-05	0.00178					239.86	0.00148	0.00144	0.00033	0.000115
11.88	8.50063e-05	0.00176	5.7418e-05	0.00178					239.88	0.00147	0.00147	0.000365	0.00011406
11.9	8.47284e-05	0.00176	5.72581e-05	0.00178					239.9	0.00148	0.00145	0.000382031	0.00012656
11.92	8.44808e-05	0.00176	5.70685e-05	0.00178					239.92	0.00146	0.00144	0.000372031	0.00016125
11.94	8.42635e-05	0.00176	5.68501e-05	0.00178					239.94	0.0015	0.00147	0.000354219	9.219e-05
11.96	8.40763e-05	0.00176	5.66042e-05	0.00178					239.96	0.00147	0.00148	0.0004275	9.281e-05
11.98	8.39187e-05	0.00176	5.63321e-05	0.00178					239.98	0.00143	0.00147	0.000450781	0.00017297
12	8.37901e-05	0.00176	5.60354e-05	0.00178					240	0.00147	0.00148	0.000372969	0.00013969
12.02	8.36895e-05	0.00176	5.57158e-05	0.00178					240.02	0.00147	0.00147	0.000395312	0.00011
12.04	8.36159e-05	0.00176	5.53752e-05	0.00178					240.04	0.00143	0.0015	0.000445	0.00013328
12.06	8.35682e-05	0.00175	5.50157e-05	0.00178					240.06	0.00142	0.00144	0.000400469	0.00015125
12.08	8.35449e-05	0.00175	5.46396e-05	0.00178					240.08	0.00147	0.00147	0.000378438	0.00011969
12.1	8.35447e-05	0.00175	5.42491e-05	0.00178					240.1	0.00146	0.00148	0.000409688	8.844e-05
12.12	8.35659e-05	0.00175	5.38468e-05	0.00178					240.12	0.00146	0.0015	0.00043375	0.00016984
12.14	8.3607e-05	0.00175	5.34352e-05	0.00178					240.14	0.00148	0.00144	0.000357344	0.00014422
12.16	8.36663e-05	0.00175	5.30169e-05	0.00178					240.16	0.00149	0.00143	0.000310156	0.00010594
12.18	8.37422e-05	0.00175	5.25946e-05	0.00178					240.18	0.00147	0.00148	0.000355156	0.00014813
12.2	8.38328e-05	0.00175	5.21711e-05	0.00178					240.2	0.00147	0.00146	0.000380156	0.00014047
12.22	8.39365e-05	0.00175	5.17489e-05	0.00178					240.22	0.00149	0.00147	0.000316719	0.00010141
12.24	8.40517e-05	0.00175	5.13308e-05	0.00178					240.24	0.00151	0.00145	0.00032125	0.0001225
12.26	8.41767e-05	0.00175	5.09195e-05	0.00178					240.26	0.00144	0.00149	0.000327969	0.00011672
12.28	8.43098e-05	0.00174	5.05175e-05	0.00178					240.28	0.00144	0.00153	0.000345313	0.00012188
12.3	8.44497e-05	0.00174	5.01274e-05	0.00178					240.3	0.0015	0.00149	0.000343125	8.188e-05
12.32	8.45946e-05	0.00174	4.97514e-05	0.00178					240.32	0.00149	0.00143	0.000356406	7.313e-05
12.34	8.47434e-05	0.00174	4.93918e-05	0.00178					240.34	0.00148	0.00147	0.000326563	7.594e-05
12.36	8.48945e-05	0.00174	4.90508e-05	0.00178					240.36	0.00145	0.00149	0.0003675	0.00015813
12.38	8.50469e-05	0.00174	4.87303e-05	0.00178					240.38	0.00147	0.00148	0.000396719	0.00011266
12.4	8.51992e-05	0.00174	4.8432e-05	0.00178					240.4	0.00144	0.0015	0.000370938	7.969e-05
12.42	8.53504e-05	0.00174	4.81575e-05	0.00178					240.42	0.00143	0.00153	0.000366563	0.00013094
12.44	8.54994e-05	0.00174	4.79082e-05	0.00178					240.44	0.00147	0.00148	0.000447031	0.00011578
12.46	8.56452e-05	0.00174	4.7685e-05	0.00178					240.46	0.00145	0.0015	0.000437344	9.781e-05
12.48	8.57871e-05	0.00174	4.7489e-05	0.00178					240.48	0.00143	0.00152	0.000409219	0.00012281
12.5	8.5924e-05	0.00174	4.73209e-05	0.00178					240.5	0.00144	0.00146	0.000445313	0.00011344
12.52	8.60553e-05	0.00174	4.7181e-05	0.00178					240.52	0.00149	0.00146	0.000454219	0.00012984
12.54	8.61802e-05	0.00174	4.70695e-05	0.00178					240.54	0.00147	0.00146	0.0004	0.00011031
12.56	8.62981e-05	0.00174	4.69866e-05	0.00178					240.56	0.00145	0.0015	0.000393281	0.00011672
12.58	8.64082e-05	0.00174	4.69318e-05	0.00178					240.58	0.0015	0.00144	0.000403594	0.00012547
12.6	8.651e-05	0.00174	4.69049e-05	0.00178					240.6	0.00149	0.00143	0.000386719	0.00011313
12.62	8.66029e-05	0.00174	4.6905e-05	0.00178					240.62	0.00146	0.00145	0.000387187	0.00014156
12.64	8.66863e-05	0.00174	4.69315e-05	0.00178					240.64	0.00149	0.00143	0.000386719	0.00010109
12.66	8.67598e-05	0.00174	4.69832e-05	0.00178					240.66	0.00153	0.00142	0.000355156	8.641e-05
12.68	8.68227e-05	0.00174	4.7059e-05	0.00178					240.68	0.00149	0.00145	0.0003625	0.00012094
12.7	8.68746e-05	0.00174	4.71576e-05	0.00178					240.7	0.00145	0.00146	0.000347656	0.00011625
12.72	8.69151e-05	0.00174	4.72776e-05	0.00178					240.72	0.0015	0.00146	0.000340625	0.00011266
12.74	8.69436e-05	0.00174	4.74173e-05	0.00178					240.74	0.0015	0.00148	0.000335	0.00013031
12.76	8.69598e-05	0.00174	4.75752e-05	0.00178					240.76	0.00146	0.00147	0.000363906	8.641e-05
12.78	8.69632e-05	0.00174	4.77496e-05	0.00178					240.78	0.00146	0.00149	0.000380938	0.00010484
12.8	8.69535e-05	0.00174	4.79386e-05	0.00178					240.8	0.00145	0.00151	0.000389375	0.00013516
12.82	8.69302e-05	0.00174	4.81405e-05	0.00178					240.82	0.00143	0.0015	0.000400313	0.00010234
12.84	8.68929e-05	0.00174	4.83536e-05	0.00178					240.84	0.00143	0.00152	0.000355156	7.922e-05
12.86	8.68415e-05	0.00175	4.85759e-05	0.00178					240.86	0.00144	0.00148	0.000356875	0.00012922
12.88	8.67756e-05	0.00175	4.88057e-05	0.00178					240.88	0.00147	0.00151	0.00040125	0.00012563
12.9	8.6695e-05	0.00175	4.90413e-05	0.00178					240.9	0.00145	0.00146	0.000364687	0.00012094
12.92	8.65994e-05	0.00175	4.92809e-05	0.00178					240.92	0.00146	0.0015	0.000389063	0.00015344
12.94	8.64889e-05	0.00175	4.9523e-05	0.00178					240.94	0.00149	0.00151	0.000383438	0.00015813
12.96	8.63631e-05	0.00175	4.9766e-05	0.00178					240.96	0.00142	0.00148	0.000397812	0.00011656
12.98	8.62222e-05	0.00175	5.00082e-05	0.00178					240.98	0.00147	0.00148	0.000415938	0.00015969
13	8.60661e-05	0.00175	5.02485e-05	0.00178					241	0.00148	0.00148	0.000360625	0.00012375
13.02	8.58949e-05	0.00175	5.04853e-05	0.00178					241.02	0.00151	0.00147	0.000341875	0.00010016
13.04	8.57089e-05	0.00175	5.07176e-05	0.00178					241.04	0.00149	0.00147	0.000420313	0.00011922
13.06	8.55081e-05	0.00175	5.09441e-05	0.00178					241.06	0.0015	0.00144	0.000392188	0.00014297
13.08	8.5293e-05	0.00175	5.11639e-05	0.00178					241.08	0.00152	0.00145	0.00034	0.00013313
13.1	8.50639e-05	0.00175	5.1376e-05	0.00178					241.1	0.00147	0.00145	0.000369063	0.00013922
13.12	8.48211e-05	0.00176	5.15796e-05	0.00178					241.12	0.00149	0.00144	0.000405156	0.00011
13.14	8.45653e-05	0.00176	5.17738e-05	0.00178					241.14	0.00149	0.00146	0.000384375	8.547e-05
13.16	8.4297e-05	0.00176	5.19582e-05	0.00178					241.16	0.00148	0.00147	0.000359688	0.00016484
13.18	8.40169e-05	0.00176	5.2132e-05	0.00178					241.18	0.00148	0.00147	0.000350938	0.00011484
13.2	8.37256e-05	0.00176	5.22948e-05	0.00178					241.2	0.00147	0.00145	0.00037375	4.156e-05
13.22	8.3424e-05	0.00176	5.24462e-05	0.00178					241.22	0.00148	0.00145	0.000350313	0.00013313
13.24	8.31128e-05	0.00176	5.25859e-05	0.00178					241.24	0.00145	0.00146	0.000372031	0.00014703
13.26	8.2793e-05	0.00176	5.27135e-05	0.00178					241.26	0.00146	0.00149	0.000400781	9e-05
13.28	8.24655e-05	0.00176	5.28288e-05	0.00178					241.28	0.00146	0.00145	0.000368594	0.00011297
13.3	8.21313e-05	0.00176	5.29318e-05	0.00178					241.3	0.00144	0.00146	0.000347656	0.00015219
13.32	8.17914e-05	0.00176	5.30222e-05	0.00178					241.32	0.00142	0.00151	0.000407187	0.00011766
13.34	8.14469e-05	0.00176	5.31e-05	0.00178					241.34	0.00144	0.00148	0.000360313	0.00015
13.36	8.1099e-05	0.00176	5.31653e-05	0.00178					241.36	0.00146	0.0015	0.000384063	0.00011859
13.38	8.07486e-05	0.00176	5.32179e-05	0.00178					241.38	0.00146	0.0015	0.000369531	0.0001525
13.4	8.03971e-05	0.00176	5.32581e-05	0.00178					241.4	0.00149	0.00148	0.000336563	0.00018156
13.42	8.00456e-05	0.00176	5.32859e-05	0.00178					241.42	0.00148	0.00146	0.000371563	0.00012766
13.44	7.96951e-05	0.00176	5.33014e-05	0.00178					241.44	0.00149	0.00151	0.000361563	0.00012375
13.46	7.93471e-05	0.00176	5.33049e-05	0.00178					241.46	0.00149	0.00147	0.000342031	0.00018578
13.48	7.90026e-05	0.00176	5.32965e-05	0.00178					241.48	0.0015	0.00147	0.000380313	0.00014938
13.5	7.86629e-05	0.00176	5.32766e-05	0.00178					241.5	0.00147	0.00146	0.000352969	0.00010063
13.52	7.8329e-05	0.00175	5.32453e-05	0.00178					241.52	0.00147	0.00149	0.000336406	0.00018172
13.54	7.80024e-05	0.00175	5.32031e-05	0.00178					241.54	0.00147	0.00147	0.000349688	0.00016313
13.56	7.76839e-05	0.00175	5.31502e-05	0.00178					241.56	0.00148	0.00149	0.000444219	0.00013969
13.58	7.73749e-05	0.00175	5.30871e-05	0.00178					241.58	0.00149	0.00149	0.000409688	0.00010484
13.6	7.70764e-05	0.00175	5.30142e-05	0.00178					241.6	0.0015	0.00147	0.000389063	0.00016953
13.62	7.67895e-05	0.00175	5.2932e-05	0.00178					241.62	0.00147	0.00146	0.000380781	0.00016625
13.64	7.65153e-05	0.00175	5.28409e-05	0.00178					241.64	0.00147	0.00147	0.000398281	9.625e-05
13.66	7.62546e-05	0.00175	5.27416e-05	0.00178					241.66	0.00145	0.00147	0.000376406	0.00011609
13.68	7.60084e-05	0.00175	5.26344e-05	0.00178					241.68	0.00147	0.00148	0.000395938	0.00013547
13.7	7.57777e-05	0.00175	5.25201e-05	0.00178					241.7	0.00147	0.00146	0.000361563	0.00015094
13.72	7.55632e-05	0.00175	5.23991e-05	0.00178					241.72	0.00145	0.00146	0.00037625	6.203e-05
13.74	7.53656e-05	0.00175	5.22722e-05	0.00178					241.74	0.00145	0.0015	0.000385469	8.828e-05
13.76	7.51857e-05	0.00175	5.214e-05	0.00178					241.76	0.00146	0.00148	0.000383438	0.00016953
13.78	7.50239e-05	0.00174	5.2003e-05	0.00178					241.78	0.00146	0.0014	0.00037	0.00011688
13.8	7.48808e-05	0.00174	5.1862e-05	0.00178					241.8	0.00149	0.00145	0.000355938	5.641e-05
13.82	7.47568e-05	0.00174	5.17175e-05	0.00178					241.82	0.00146	0.00145	0.000340938	0.00010109
13.84	7.46521e-05	0.00174	5.15702e-05	0.00178					241.84	0.00146	0.00142	0.000384219	0.00017344
13.86	7.45668e-05	0.00174	5.14207e-05	0.00178					241.86	0.00147	0.00146	0.000333125	0.00014313
13.88	7.45012e-05	0.00174	5.12696e-05	0.00178					241.88	0.00147	0.00147	0.000323438	0.00010797
13.9	7.4455e-05	0.00174	5.11173e-05	0.00178					241.9	0.00145	0.00146	0.000404063	0.00014563
13.92	7.44282e-05	0.00174	5.09645e-05	0.00178					241.92	0.0015	0.00147	0.000354688	0.00017172
13.94	7.44203e-05	0.00174	5.08117e-05	0.00178					241.94	0.0015	0.00146	0.000356875	0.00013328
13.96	7.44309e-05	0.00174	5.06591e-05	0.00178					241.96	0.00145	0.00145	0.000364687	9.844e-05
13.98	7.44596e-05	0.00174	5.05073e-05	0.00178					241.98	0.00146	0.00145	0.000406406	0.00016625
14	7.45054e-05	0.00174	5.03565e-05	0.00177					242	0.0015	0.00149	0.000392344	0.00013766
14.02	7.45677e-05	0.00174	5.02071e-05	0.00177					242.02	0.00146	0.00147	0.000362813	9.844e-05
14.04	7.46455e-05	0.00174	5.00592e-05	0.00177					242.04	0.00144	0.00151	0.000426563	0.00015688
14.06	7.47376e-05	0.00173	4.9913e-05	0.00177					242.06	0.00144	0.00149	0.00039625	0.00013281
14.08	7.48429e-05	0.00173	4.97687e-05	0.00177					242.08	0.00148	0.00149	0.000387344	7.313e-05
14.1	7.49601e-05	0.00173	4.96263e-05	0.00177					242.1	0.00146	0.0015	0.000429531	7.578e-05
14.12	7.50877e-05	0.00173	4.94858e-05	0.00177					242.12	0.00145	0.0015	0.00042875	0.00011859
14.14	7.52242e-05	0.00173	4.93472e-05	0.00177					242.14	0.0015	0.00143	0.000384375	0.00013016
14.16	7.53681e-05	0.00173	4.92105e-05	0.00177					242.16	0.00151	0.00148	0.000392344	5.922e-05
14.18	7.55176e-05	0.00173	4.90755e-05	0.00178					242.18	0.00147	0.0015	0.000387344	0.00011703
14.2	7.56712e-05	0.00173	4.89423e-05	0.00178					242.2	0.00147	0.00144	0.000382031	0.00012594
14.22	7.58269e-05	0.00174	4.88105e-05	0.00178					242.22	0.00152	0.00145	0.000382344	0.00013141
14.24	7.59831e-05	0.00174	4.86803e-05	0.00178					242.24	0.0015	0.00149	0.000347969	9.531e-05
14.26	7.6138e-05	0.00174	4.85514e-05	0.00178					242.26	0.00148	0.0015	0.000402188	8.047e-05
14.28	7.62897e-05	0.00174	4.84238e-05	0.00178					242.28	0.00149	0.00142	0.000372031	0.00012609
14.3	7.64366e-05	0.00174	4.82975e-05	0.00178					242.3	0.00147	0.00144	0.000372969	0.00012391
14.32	7.65769e-05	0.00174	4.81723e-05	0.00178					242.32	0.00147	0.00148	0.000379063	0.00010109
14.34	7.6709e-05	0.00174	4.80484e-05	0.00178					242.34	0.00149	0.00147	0.000318125	0.00011656
14.36	7.68312e-05	0.00174	4.79259e-05	0.00178					242.36	0.00148	0.00144	0.000392813	0.00016609
14.38	7.69421e-05	0.00174	4.78048e-05	0.00178					242.38	0.00147	0.00145	0.000440469	0.00014031
14.4	7.70404e-05	0.00174	4.76853e-05	0.00178					242.4	0.00144	0.00148	0.000370469	7.375e-05
14.42	7.71247e-05	0.00174	4.75679e-05	0.00178					242.42	0.00146	0.0015	0.000358281	0.00014719
14.44	7.7194e-05	0.00174	4.74527e-05	0.00178					242.44	0.00144	0.00149	0.000399219	0.00014469
14.46	7.72473e-05	0.00174	4.73403e-05	0.00178					242.46	0.00146	0.00146	0.000367813	8.328e-05
14.48	7.72837e-05	0.00175	4.72311e-05	0.00178					242.48	0.00146	0.00147	0.000368438	9.453e-05
14.5	7.73025e-05	0.00175	4.71257e-05	0.00178					242.5	0.00145	0.00151	0.00036125	0.00014188
14.52	7.73034e-05	0.00175	4.70246e-05	0.00178					242.52	0.00148	0.00145	0.000377813	0.00012844
14.54	7.72858e-05	0.00175	4.69286e-05	0.00178					242.54	0.0015	0.00144	0.000357656	6.406e-05
14.56	7.72498e-05	0.00175	4.68384e-05	0.00178					242.56	0.0015	0.00149	0.000394219	0.00010047
14.58	7.71953e-05	0.00175	4.67546e-05	0.00178					242.58	0.00151	0.00147	0.000412188	0.00014578
14.6	7.71225e-05	0.00175	4.66781e-05	0.00178					242.6	0.00145	0.00147	0.000345469	0.00010344
14.62	7.70317e-05	0.00175	4.66097e-05	0.00178					242.62	0.0015	0.00148	0.000402344	6.297e-05
14.64	7.69234e-05	0.00175	4.65501e-05	0.00178					242.64	0.0015	0.00148	0.000408281	0.00013844
14.66	7.67983e-05	0.00175	4.65001e-05	0.00178					242.66	0.0015	0.00146	0.000352188	0.00011375
14.68	7.66572e-05	0.00176	4.64603e-05	0.00178					242.68	0.00154	0.00148	0.000366094	0.00013766
14.7	7.6501e-05	0.00176	4.64315e-05	0.00178					242.7	0.00147	0.00149	0.000427969	0.00010906
14.72	7.63308e-05	0.00176	4.64142e-05	0.00178					242.72	0.00151	0.00145	0.00040625	0.00010219
14.74	7.61475e-05	0.00176	4.6409e-05	0.00178					242.74	0.00151	0.00149	0.000343594	0.00016297
14.76	7.59526e-05	0.00176	4.64161e-05	0.00178					242.76	0.00144	0.00149	0.000364219	0.00014469
14.78	7.57472e-05	0.00176	4.64361e-05	0.00178					242.78	0.00147	0.00151	0.000408594	0.00011547
14.8	7.55326e-05	0.00176	4.64689e-05	0.00178					242.8	0.00147	0.00151	0.000345937	0.00013266
14.82	7.53103e-05	0.00176	4.65147e-05	0.00178					242.82	0.00146	0.0015	0.000356406	0.00013938
14.84	7.50816e-05	0.00176	4.65733e-05	0.00178					242.84	0.00144	0.00149	0.000415313	0.00012766
14.86	7.48479e-05	0.00176	4.66446e-05	0.00178					242.86	0.00146	0.0015	0.000384531	0.00012141
14.88	7.46105e-05	0.00176	4.6728e-05	0.00178					242.88	0.00147	0.00145	0.000339219	0.00011094
14.9	7.43708e-05	0.00176	4.68231e-05	0.00178					242.9	0.00144	0.00147	0.000357344	0.00015047
14.92	7.41302e-05	0.00176	4.69291e-05	0.00178					242.92	0.00145	0.00146	0.000403438	0.00015328
14.94	7.38898e-05	0.00176	4.70453e-05	0.00178					242.94	0.00146	0.00146	0.0003425	0.00015531
14.96	7.36508e-05	0.00176	4.71705e-05	0.00178					242.96	0.00146	0.00148	0.000311406	0.00011375
14.98	7.34143e-05	0.00176	4.73038e-05	0.00178					242.98	0.00147	0.00144	0.000368438	9.797e-05
15	7.31815e-05	0.00176	4.74438e-05	0.00178					243	0.00147	0.00144	0.000407344	0.00015156
15.02	7.2953e-05	0.00176	4.75893e-05	0.00178					243.02	0.0015	0.00149	0.000305938	0.00014953
15.04	7.273e-05	0.00176	4.77388e-05	0.00178					243.04	0.0015	0.00145	0.000340625	8.438e-05
15.06	7.25129e-05	0.00176	4.78908e-05	0.00178					243.06	0.00152	0.00142	0.000415469	0.00010891
15.08	7.23026e-05	0.00176	4.80439e-05	0.00178					243.08	0.00152	0.00144	0.00038125	0.00012172
15.1	7.20996e-05	0.00176	4.81966e-05	0.00178					243.1	0.00149	0.00149	0.000361406	0.00016938
15.12	7.19043e-05	0.00176	4.83471e-05	0.00178					243.12	0.00149	0.00143	0.000374688	0.00014406
15.14	7.1717e-05	0.00176	4.84942e-05	0.00178					243.14	0.00148	0.00149	0.000417656	0.00011719
15.16	7.1538e-05	0.00175	4.86362e-05	0.00178					243.16	0.00151	0.00148	0.000380156	0.00011031
15.18	7.13676e-05	0.00175	4.87718e-05	0.00178					243.18	0.00147	0.00144	0.000350156	0.00016219
15.2	7.12057e-05	0.00175	4.88997e-05	0.00178					243.2	0.00144	0.00154	0.000390469	0.00010797
15.22	7.10525e-05	0.00175	4.90187e-05	0.00178					243.22	0.00149	0.00148	0.000384844	0.00012797
15.24	7.09078e-05	0.00175	4.91277e-05	0.00178					243.24	0.0015	0.00149	0.000358594	0.00018328
15.26	7.07716e-05	0.00175	4.92259e-05	0.00178					243.26	0.00145	0.0015	0.000388906	0.00011578
15.28	7.06438e-05	0.00175	4.93124e-05	0.00178					243.28	0.00146	0.00147	0.000385156	0.00017672
15.3	7.05241e-05	0.00175	4.93867e-05	0.00178					243.3	0.00145	0.00151	0.000387031	0.00018125
15.32	7.04123e-05	0.00175	4.94485e-05	0.00178					243.32	0.00145	0.00146	0.000332188	0.00013156
15.34	7.03081e-05	0.00175	4.94975e-05	0.00178					243.34	0.00142	0.0015	0.000358906	0.00013875
15.36	7.02114e-05	0.00174	4.95337e-05	0.00178					243.36	0.00144	0.00149	0.000396094	0.00011625
15.38	7.01218e-05	0.00174	4.95573e-05	0.00178					243.38	0.00148	0.00148	0.000347188	0.00012266
15.4	7.0039e-05	0.00174	4.95687e-05	0.00178					243.4	0.00152	0.00144	0.000367969	9.828e-05
15.42	6.99627e-05	0.00174	4.95685e-05	0.00178					243.42	0.00146	0.00144	0.000379844	6.719e-05
15.44	6.98926e-05	0.00174	4.95574e-05	0.00178					243.44	0.00144	0.00143	0.000348281	0.00012688
15.46	6.98284e-05	0.00174	4.95363e-05	0.00178					243.46	0.0015	0.00145	0.000365781	0.00016609
15.48	6.97699e-05	0.00174	4.95062e-05	0.00178					243.48	0.00151	0.00142	0.000373281	0.00012406
15.5	6.97167e-05	0.00174	4.94684e-05	0.00178					243.5	0.00149	0.00147	0.000349688	3.406e-05
15.52	6.96687e-05	0.00174	4.9424e-05	0.00178					243.52	0.00148	0.00146	0.000375	0.00010453
15.54	6.96255e-05	0.00174	4.93744e-05	0.00178					243.54	0.0015	0.00149	0.000391563	0.00016969
15.56	6.95869e-05	0.00174	4.93212e-05	0.00178					243.56	0.00148	0.00146	0.000414219	8.313e-05
15.58	6.95527e-05	0.00174	4.92656e-05	0.00178					243.58	0.00149	0.00147	0.000393906	7.188e-05
15.6	6.95227e-05	0.00173	4.92092e-05	0.00178					243.6	0.00147	0.00148	0.000334531	0.00013
15.62	6.94966e-05	0.00173	4.91535e-05	0.00178					243.62	0.0015	0.00149	0.000400938	0.00016516
15.64	6.94743e-05	0.00173	4.90998e-05	0.00178					243.64	0.00147	0.00144	0.000422031	0.00011469
15.66	6.94555e-05	0.00173	4.90495e-05	0.00177					243.66	0.00145	0.00151	0.000400781	9.547e-05
15.68	6.94402e-05	0.00173	4.90039e-05	0.00177					243.68	0.00146	0.00149	0.000392656	0.00011031
15.7	6.9428e-05	0.00173	4.89641e-05	0.00177					243.7	0.00149	0.00147	0.000420469	0.00014016
15.72	6.94188e-05	0.00173	4.89312e-05	0.00177					243.72	0.00147	0.0015	0.000379531	0.00015891
15.74	6.94124e-05	0.00173	4.89061e-05	0.00177					243.74	0.00147	0.00147	0.000398281	0.00014781
15.76	6.94087e-05	0.00173	4.88896e-05	0.00177					243.76	0.00149	0.00147	0.000345313	7.953e-05
15.78	6.94074e-05	0.00173	4.88822e-05	0.00177					243.78	0.0015	0.00144	0.000347969	0.00012813
15.8	6.94083e-05	0.00173	4.88844e-05	0.00177					243.8	0.00149	0.00148	0.000433125	0.00016359
15.82	6.94112e-05	0.00173	4.88965e-05	0.00177					243.82	0.00149	0.00145	0.000375625	0.00011281
15.84	6.9416e-05	0.00173	4.89185e-05	0.00177					243.84	0.00149	0.00144	0.00035125	7.031e-05
15.86	6.94225e-05	0.00173	4.89504e-05	0.00177					243.86	0.00145	0.00151	0.000382813	0.00013125
15.88	6.94303e-05	0.00173	4.89918e-05	0.00177					243.88	0.00145	0.0015	0.000399219	0.00012234
15.9	6.94394e-05	0.00173	4.90425e-05	0.00177					243.9	0.00145	0.00145	0.000382344	9.906e-05
15.92	6.94495e-05	0.00173	4.91018e-05	0.00177					243.92	0.00149	0.00146	0.000379531	0.00010953
15.94	6.94603e-05	0.00173	4.91691e-05	0.00178					243.94	0.00147	0.00151	0.000372344	6.75e-05
15.96	6.94718e-05	0.00174	4.92437e-05	0.00178					243.96	0.00146	0.00147	0.000396719	9.656e-05
15.98	6.94837e-05	0.00174	4.93245e-05	0.00178					243.98	0.00148	0.00148	0.000405781	0.00018203
16	6.94958e-05	0.00174	4.94106e-05	0.00178					244	0.00148	0.00148	0.000373594	8.734e-05
16.02	6.95079e-05	0.00174	4.95011e-05	0.00178					244.02	0.00145	0.00152	0.000344063	8.406e-05
16.04	6.95198e-05	0.00174	4.95947e-05	0.00178					244.04	0.00148	0.00149	0.0004175	0.00012656
16.06	6.95314e-05	0.00174	4.96905e-05	0.00178					244.06	0.00147	0.0015	0.000393594	0.00014281
16.08	6.95425e-05	0.00174	4.97874e-05	0.00178					244.08	0.00146	0.00154	0.000338281	9.109e-05
16.1	6.95529e-05	0.00174	4.98842e-05	0.00178					244.1	0.00147	0.00151	0.000376875	6.609e-05
16.12	6.95625e-05	0.00174	4.998e-05	0.00178					244.12	0.00149	0.00147	0.000421406	0.0001225
16.14	6.95711e-05	0.00174	5.00737e-05	0.00178					244.14	0.00148	0.00149	0.000384375	8.563e-05
16.16	6.95786e-05	0.00174	5.01645e-05	0.00178					244.16	0.00149	0.00146	0.000335625	5.422e-05
16.18	6.95848e-05	0.00174	5.02515e-05	0.00178					244.18	0.00149	0.00149	0.000372813	0.00015297
16.2	6.95897e-05	0.00175	5.0334e-05	0.00178					244.2	0.0015	0.00148	0.000451875	0.00014078
16.22	6.95929e-05	0.00175	5.04113e-05	0.00178					244.22	0.00149	0.00146	0.000367344	9.422e-05
16.24	6.95945e-05	0.00175	5.0483e-05	0.00178					244.24	0.00149	0.00144	0.000364063	9.422e-05
16.26	6.95943e-05	0.00175	5.05486e-05	0.00178					244.26	0.00147	0.00148	0.000395156	0.00012609
16.28	6.95921e-05	0.00175	5.06078e-05	0.00178					244.28	0.00151	0.00145	0.000359688	0.00012219
16.3	6.95877e-05	0.00175	5.06604e-05	0.00178					244.3	0.00153	0.00146	0.000364844	8.094e-05
16.32	6.9581e-05	0.00175	5.07063e-05	0.00178					244.32	0.0015	0.00146	0.000392031	0.00014828
16.34	6.95717e-05	0.00175	5.07456e-05	0.00178					244.34	0.00148	0.00147	0.000428281	0.00014484
16.36	6.95597e-05	0.00175	5.07783e-05	0.00178					244.36	0.0015	0.00146	0.000393594	0.00013
16.38	6.95447e-05	0.00175	5.08045e-05	0.00178					244.38	0.00149	0.00147	0.000398594	0.00013531
16.4	6.95265e-05	0.00175	5.08246e-05	0.00178					244.4	0.00147	0.00145	0.000405156	0.0001525
16.42	6.95048e-05	0.00176	5.08388e-05	0.00179					244.42	0.00147	0.00144	0.000400313	0.00019313
16.44	6.94793e-05	0.00176	5.08475e-05	0.00179					244.44	0.00146	0.00151	0.000382344	0.00013031
16.46	6.94497e-05	0.00176	5.0851e-05	0.00179					244.46	0.00148	0.00149	0.000408438	0.00012953
16.48	6.94157e-05	0.00176	5.08497e-05	0.00179					244.48	0.00143	0.00146	0.000365625	0.00019156
16.5	6.93771e-05	0.00176	5.08439e-05	0.00179					244.5	0.00147	0.00149	0.000358438	0.00015031
16.52	6.93334e-05	0.00176	5.08341e-05	0.00179					244.52	0.00148	0.0015	0.000347969	0.00012344
16.54	6.92845e-05	0.00176	5.08204e-05	0.00179					244.54	0.00146	0.00149	0.000341719	0.00013703
16.56	6.92298e-05	0.00176	5.08034e-05	0.00179					244.56	0.0015	0.00149	0.000320156	0.00014781
16.58	6.91693e-05	0.00176	5.07831e-05	0.00179					244.58	0.00149	0.00152	0.000314063	0.00011578
16.6	6.91025e-05	0.00176	5.07597e-05	0.00179					244.6	0.00145	0.00152	0.00034	6.609e-05
16.62	6.90292e-05	0.00176	5.07335e-05	0.00179					244.62	0.00148	0.0015	0.000330938	0.00012109
16.64	6.89493e-05	0.00176	5.07044e-05	0.00179					244.64	0.0015	0.00149	0.00035625	0.00011625
16.66	6.88624e-05	0.00176	5.06725e-05	0.00179					244.66	0.00149	0.00146	0.000326406	7.922e-05
16.68	6.87686e-05	0.00176	5.06378e-05	0.00179					244.68	0.00148	0.00146	0.000327344	7.203e-05
16.7	6.86677e-05	0.00176	5.06001e-05	0.00179					244.7	0.0015	0.0015	0.000395156	0.00014516
16.72	6.85597e-05	0.00176	5.05593e-05	0.00179					244.72	0.00148	0.00146	0.000355938	0.00015375
16.74	6.84447e-05	0.00176	5.05152e-05	0.00179					244.74	0.00148	0.00145	0.000403906	9.281e-05
16.76	6.83227e-05	0.00176	5.04675e-05	0.00179					244.76	0.00151	0.00147	0.000401719	8.719e-05
16.78	6.81941e-05	0.00176	5.0416e-05	0.00179					244.78	0.00148	0.00148	0.000408281	0.00014594
16.8	6.8059e-05	0.00176	5.03605e-05	0.00179					244.8	0.00146	0.00146	0.000397969	0.00016422
16.82	6.79179e-05	0.00176	5.03006e-05	0.00179					244.82	0.00148	0.00145	0.000407969	0.00013281
16.84	6.77712e-05	0.00175	5.02362e-05	0.00178					244.84	0.00149	0.00144	0.000412344	0.00012484
16.86	6.76194e-05	0.00175	5.01671e-05	0.00178					244.86	0.0015	0.00147	0.000410781	0.0001625
16.88	6.74632e-05	0.00175	5.0093e-05	0.00178					244.88	0.00148	0.0014	0.000434219	0.00012094
16.9	6.73031e-05	0.00175	5.00139e-05	0.00178					244.9	0.00148	0.00145	0.000415938	0.00016125
16.92	6.714e-05	0.00175	4.99297e-05	0.00178					244.92	0.00149	0.00147	0.000353438	0.00017688
16.94	6.69747e-05	0.00175	4.98406e-05	0.00178					244.94	0.00147	0.00142	0.000376875	0.00013375
16.96	6.6808e-05	0.00175	4.97466e-05	0.00178					244.96	0.00146	0.00143	0.00040625	0.00019313
16.98	6.66407e-05	0.00175	4.9648e-05	0.00178					244.98	0.0015	0.00147	0.000326719	0.0001425
17	6.64739e-05	0.00175	4.95451e-05	0.00178					245	0.0015	0.00152	0.000348125	0.00011563
17.02	6.63085e-05	0.00175	4.94384e-05	0.00178					245.02	0.00149	0.00145	0.000355781	9.109e-05
17.04	6.61454e-05	0.00174	4.93284e-05	0.00178					245.04	0.00148	0.00144	0.000347344	0.00013156
17.06	6.59855e-05	0.00174	4.92159e-05	0.00178					245.06	0.0015	0.00152	0.000329844	0.00015641
17.08	6.58297e-05	0.00174	4.91015e-05	0.00178					245.08	0.0015	0.00149	0.000299375	0.00013625
17.1	6.5679e-05	0.00174	4.89861e-05	0.00178					245.1	0.00148	0.00146	0.000344063	8.375e-05
17.12	6.55342e-05	0.00174	4.88707e-05	0.00178					245.12	0.00149	0.00149	0.000364063	0.00012641
17.14	6.5396e-05	0.00174	4.87562e-05	0.00178					245.14	0.00145	0.00153	0.000354375	0.00016297
17.16	6.52651e-05	0.00174	4.86438e-05	0.00178					245.16	0.00146	0.0015	0.000385313	0.00010938
17.18	6.51421e-05	0.00174	4.85345e-05	0.00178					245.18	0.00145	0.00145	0.000412969	8.281e-05
17.2	6.50275e-05	0.00174	4.84295e-05	0.00178					245.2	0.00147	0.0015	0.000380156	0.00012813
17.22	6.49218e-05	0.00174	4.83299e-05	0.00177					245.22	0.00147	0.00147	0.000363437	0.00013063
17.24	6.48251e-05	0.00173	4.82367e-05	0.00177					245.24	0.00145	0.0015	0.000401406	8.906e-05
17.26	6.47377e-05	0.00173	4.81511e-05	0.00177					245.26	0.00148	0.00147	0.000457813	0.00013469
17.28	6.46595e-05	0.00173	4.80741e-05	0.00177					245.28	0.00151	0.00147	0.000388438	0.00016125
17.3	6.45907e-05	0.00173	4.80065e-05	0.00177					245.3	0.00147	0.00149	0.000381094	0.00010531
17.32	6.45309e-05	0.00173	4.79492e-05	0.00177					245.32	0.00148	0.00145	0.000389375	0.00014156
17.34	6.44798e-05	0.00173	4.79029e-05	0.00177					245.34	0.00147	0.00148	0.000401094	0.00014469
17.36	6.4437e-05	0.00173	4.78682e-05	0.00177					245.36	0.00151	0.00145	0.0004	9.766e-05
17.38	6.44021e-05	0.00173	4.78454e-05	0.00177					245.38	0.00152	0.00146	0.000383125	0.00010875
17.4	6.43743e-05	0.00173	4.78348e-05	0.00177					245.4	0.00149	0.00144	0.000412344	0.00015703
17.42	6.43531e-05	0.00173	4.78366e-05	0.00177					245.42	0.00152	0.00143	0.000410781	0.00011594
17.44	6.43375e-05	0.00173	4.78504e-05	0.00177					245.44	0.0015	0.00145	0.000347344	7.563e-05
17.46	6.43269e-05	0.00173	4.78762e-05	0.00177					245.46	0.00149	0.00146	0.00035375	0.00010469
17.48	6.43203e-05	0.00173	4.79134e-05	0.00177					245.48	0.0015	0.00143	0.0004125	0.00011953
17.5	6.43168e-05	0.00173	4.79613e-05	0.00177					245.5	0.00149	0.00143	0.000405781	9.625e-05
17.52	6.43156e-05	0.00173	4.80191e-05	0.00177					245.52	0.00146	0.00152	0.000338125	0.00013703
17.54	6.43157e-05	0.00173	4.80858e-05	0.00177					245.54	0.00148	0.00149	0.000379375	0.00010609
17.56	6.43163e-05	0.00173	4.81603e-05	0.00177					245.56	0.00149	0.00145	0.000411094	9.047e-05
17.58	6.43165e-05	0.00173	4.82411e-05	0.00177					245.58	0.00147	0.00147	0.000364063	0.00011641
17.6	6.43155e-05	0.00173	4.8327e-05	0.00177					245.6	0.00144	0.00149	0.000375781	0.00014
17.62	6.43126e-05	0.00173	4.84164e-05	0.00177					245.62	0.00147	0.00149	0.000374531	0.00010125
17.64	6.43071e-05	0.00173	4.85076e-05	0.00177					245.64	0.00146	0.00147	0.0003925	0.00012531
17.66	6.42984e-05	0.00174	4.85991e-05	0.00177					245.66	0.00142	0.00152	0.000366094	0.00014469
17.68	6.42861e-05	0.00174	4.86892e-05	0.00177					245.68	0.00145	0.00149	0.000385781	0.00013594
17.7	6.42698e-05	0.00174	4.87762e-05	0.00177					245.7	0.00148	0.00154	0.000406406	9.641e-05
17.72	6.4249e-05	0.00174	4.88584e-05	0.00177					245.72	0.00149	0.00147	0.000375156	0.00013563
17.74	6.42238e-05	0.00174	4.89342e-05	0.00177					245.74	0.00146	0.00148	0.000371719	0.0001125
17.76	6.41939e-05	0.00174	4.90022e-05	0.00177					245.76	0.00149	0.00153	0.000359531	0.00011109
17.78	6.41594e-05	0.00174	4.90609e-05	0.00177					245.78	0.00154	0.00147	0.000365313	0.00011891
17.8	6.41203e-05	0.00174	4.91091e-05	0.00177					245.8	0.00153	0.00145	0.00036	0.00010906
17.82	6.40769e-05	0.00174	4.91456e-05	0.00177					245.82	0.00151	0.00146	0.000305156	7.625e-05
17.84	6.40294e-05	0.00174	4.91694e-05	0.00177					245.84	0.00151	0.00148	0.000383125	0.00012359
17.86	6.39781e-05	0.00175	4.91798e-05	0.00177					245.86	0.00153	0.00145	0.000405781	0.00011094
17.88	6.39234e-05	0.00175	4.91762e-05	0.00178					245.88	0.00152	0.00147	0.00035875	8.406e-05
17.9	6.38658e-05	0.00175	4.91583e-05	0.00178					245.9	0.0015	0.00144	0.000386875	8.859e-05
17.92	6.38056e-05	0.00175	4.91258e-05	0.00178					245.92	0.00151	0.00148	0.000384375	9.094e-05
17.94	6.37434e-05	0.00175	4.90789e-05	0.00178					245.94	0.00148	0.00149	0.000452969	9.938e-05
17.96	6.36797e-05	0.00175	4.90178e-05	0.00178					245.96	0.0015	0.00147	0.000403594	8.875e-05
17.98	6.36148e-05	0.00175	4.89431e-05	0.00178					245.98	0.00148	0.00148	0.000340469	0.00010563
18	6.35494e-05	0.00175	4.88555e-05	0.00178					246	0.00145	0.00144	0.000421094	0.00012578
18.02	6.34836e-05	0.00175	4.87558e-05	0.00178					246.02	0.00149	0.00152	0.000418281	0.00012344
18.04	6.34181e-05	0.00175	4.86452e-05	0.00178					246.04	0.00149	0.0015	0.000381094	0.00015516
18.06	6.33529e-05	0.00176	4.85248e-05	0.00178					246.06	0.00143	0.00144	0.000383281	0.00015203
18.08	6.32885e-05	0.00176	4.83962e-05	0.00178					246.08	0.00143	0.00149	0.000399375	0.00015156
18.1	6.32251e-05	0.00176	4.82608e-05	0.00178					246.1	0.00147	0.00152	0.000381563	0.00012391
18.12	6.31626e-05	0.00176	4.81203e-05	0.00178					246.12	0.00144	0.00149	0.0003525	0.00017
18.14	6.31013e-05	0.00176	4.79763e-05	0.00178					246.14	0.00147	0.00144	0.000370156	0.00012938
18.16	6.30411e-05	0.00176	4.78307e-05	0.00179					246.16	0.00152	0.00147	0.000362344	0.00014047
18.18	6.29819e-05	0.00176	4.76851e-05	0.00179					246.18	0.00148	0.00149	0.0003475	0.00015906
18.2	6.29237e-05	0.00176	4.75413e-05	0.00179					246.2	0.00146	0.00144	0.000361406	0.00014875
18.22	6.28661e-05	0.00176	4.74011e-05	0.00179					246.22	0.00148	0.00148	0.000355312	0.00011844
18.24	6.28091e-05	0.00176	4.72661e-05	0.00179					246.24	0.00154	0.0015	0.00034375	8.156e-05
18.26	6.27524e-05	0.00176	4.7138e-05	0.00179					246.26	0.00151	0.00147	0.000354062	9.406e-05
18.28	6.26956e-05	0.00176	4.70182e-05	0.00179					246.28	0.00146	0.00143	0.000397656	0.00013094
18.3	6.26386e-05	0.00176	4.69081e-05	0.00179					246.3	0.00152	0.00151	0.000368594	8.484e-05
18.32	6.25809e-05	0.00176	4.68088e-05	0.00179					246.32	0.00153	0.00148	0.000355781	9.734e-05
18.34	6.25225e-05	0.00176	4.67215e-05	0.00179					246.34	0.00149	0.00144	0.000393906	0.00011781
18.36	6.24629e-05	0.00176	4.66471e-05	0.00179					246.36	0.00148	0.00147	0.000397812	0.00013719
18.38	6.24022e-05	0.00176	4.65861e-05	0.00179					246.38	0.00148	0.00148	0.000371875	0.00013094
18.4	6.234e-05	0.00176	4.65392e-05	0.00179					246.4	0.00148	0.00144	0.000384375	7.094e-05
18.42	6.22763e-05	0.00176	4.65066e-05	0.00179					246.42	0.00147	0.0015	0.000427813	0.00015781
18.44	6.22112e-05	0.00176	4.64884e-05	0.00179					246.44	0.00145	0.00149	0.0003875	0.00014438
18.46	6.21446e-05	0.00176	4.64845e-05	0.00179					246.46	0.00146	0.00147	0.000363125	9.344e-05
18.48	6.20769e-05	0.00176	4.64946e-05	0.00179					246.48	0.00149	0.00147	0.000375469	0.00012797
18.5	6.20082e-05	0.00176	4.65183e-05	0.00179					246.5	0.00147	0.00153	0.000393281	0.00015281
18.52	6.19388e-05	0.00176	4.65548e-05	0.00179					246.52	0.0015	0.00147	0.000397969	0.00013453
18.54	6.18692e-05	0.00175	4.66034e-05	0.00179					246.54	0.00148	0.00144	0.000355156	0.00010875
18.56	6.17999e-05	0.00175	4.6663e-05	0.00179					246.56	0.00149	0.0015	0.000324844	0.00015203
18.58	6.17315e-05	0.00175	4.67326e-05	0.00179					246.58	0.00149	0.00146	0.000380625	0.00020453
18.6	6.16647e-05	0.00175	4.68109e-05	0.00179					246.6	0.00149	0.00142	0.000393125	0.00012906
18.62	6.16001e-05	0.00175	4.68966e-05	0.00179					246.62	0.00147	0.00145	0.000347031	0.00010563
18.64	6.15385e-05	0.00175	4.69883e-05	0.00179					246.64	0.00148	0.00147	0.000353906	0.00011359
18.66	6.14808e-05	0.00175	4.70844e-05	0.00179					246.66	0.00149	0.00149	0.000410781	0.000115
18.68	6.14276e-05	0.00175	4.71835e-05	0.00179					246.68	0.00151	0.00143	0.000370781	0.00012859
18.7	6.13798e-05	0.00174	4.7284e-05	0.00178					246.7	0.00149	0.00146	0.000321875	0.00012688
18.72	6.13382e-05	0.00174	4.73844e-05	0.00178					246.72	0.00149	0.00146	0.000371563	0.00012359
18.74	6.13035e-05	0.00174	4.74832e-05	0.00178					246.74	0.00147	0.00145	0.000417812	0.00013234
18.76	6.12765e-05	0.00174	4.75789e-05	0.00178					246.76	0.00151	0.00145	0.000366563	0.00011672
18.78	6.12576e-05	0.00174	4.767e-05	0.00178					246.78	0.00147	0.00151	0.000391094	0.00012438
18.8	6.12475e-05	0.00174	4.77553e-05	0.00178					246.8	0.00143	0.0015	0.000389219	0.00010234
18.82	6.12465e-05	0.00174	4.78333e-05	0.00178					246.82	0.00147	0.00145	0.000368438	0.00015
18.84	6.1255e-05	0.00174	4.7903e-05	0.00178					246.84	0.00149	0.00146	0.000390313	0.00010547
18.86	6.12731e-05	0.00173	4.79633e-05	0.00178					246.86	0.00147	0.0015	0.000430625	8.109e-05
18.88	6.13009e-05	0.00173	4.80132e-05	0.00178					246.88	0.00144	0.00144	0.000386094	0.00011297
18.9	6.13383e-05	0.00173	4.80518e-05	0.00178					246.9	0.0015	0.00142	0.000357656	0.0001475
18.92	6.1385e-05	0.00173	4.80786e-05	0.00178					246.92	0.00151	0.00149	0.000385	0.00013891
18.94	6.14407e-05	0.00173	4.8093e-05	0.00178					246.94	0.00146	0.00149	0.000402813	0.00011922
18.96	6.15048e-05	0.00173	4.80944e-05	0.00177					246.96	0.0015	0.00144	0.000394844	0.00012703
18.98	6.15767e-05	0.00173	4.80827e-05	0.00177					246.98	0.00152	0.00146	0.000401875	0.00014125
19	6.16556e-05	0.00173	4.80577e-05	0.00177					247	0.00152	0.00146	0.000397656	9.938e-05
19.02	6.17406e-05	0.00173	4.80194e-05	0.00177					247.02	0.0015	0.0015	0.000395312	0.00013672
19.04	6.18307e-05	0.00173	4.79679e-05	0.00177					247.04	0.0015	0.00146	0.000349688	0.00013484
19.06	6.19248e-05	0.00173	4.79034e-05	0.00177					247.06	0.00155	0.0014	0.000393594	0.00012516
19.08	6.20217e-05	0.00173	4.78264e-05	0.00177					247.08	0.00152	0.0015	0.000402188	0.00014422
19.1	6.21202e-05	0.00173	4.77372e-05	0.00177					247.1	0.00148	0.00149	0.00036625	8.406e-05
19.12	6.22192e-05	0.00173	4.76366e-05	0.00177					247.12	0.00151	0.00145	0.000337813	0.00015578
19.14	6.23174e-05	0.00173	4.75251e-05	0.00177					247.14	0.00148	0.0015	0.00037	0.0001625
19.16	6.24134e-05	0.00173	4.74036e-05	0.00177					247.16	0.00147	0.0015	0.00039125	9.344e-05
19.18	6.25063e-05	0.00173	4.72729e-05	0.00177					247.18	0.00145	0.00149	0.000324844	0.00010328
19.2	6.25947e-05	0.00173	4.7134e-05	0.00177					247.2	0.00148	0.00146	0.000370469	0.00012234
19.22	6.26778e-05	0.00173	4.69878e-05	0.00177					247.22	0.00146	0.00149	0.000430156	7.766e-05
19.24	6.27543e-05	0.00173	4.68354e-05	0.00177					247.24	0.00143	0.00149	0.000395938	7.609e-05
19.26	6.28237e-05	0.00173	4.66778e-05	0.00177					247.26	0.00145	0.00148	0.000364687	0.00014453
19.28	6.2885e-05	0.00173	4.65163e-05	0.00177					247.28	0.00149	0.0015	0.000385313	0.00013469
19.3	6.29376e-05	0.00173	4.63518e-05	0.00177					247.3	0.00145	0.0015	0.000392344	8e-05
19.32	6.29811e-05	0.00173	4.61856e-05	0.00177					247.32	0.00143	0.00148	0.000379844	7.766e-05
19.34	6.30152e-05	0.00174	4.60189e-05	0.00177					247.34	0.00151	0.00148	0.000370313	9.469e-05
19.36	6.30396e-05	0.00174	4.58526e-05	0.00177					247.36	0.00148	0.0015	0.000405937	0.00013563
19.38	6.30542e-05	0.00174	4.56881e-05	0.00178					247.38	0.00151	0.00145	0.000453281	0.00011688
19.4	6.30592e-05	0.00174	4.55263e-05	0.00178					247.4	0.00151	0.00147	0.000375469	8.313e-05
19.42	6.30548e-05	0.00174	4.53684e-05	0.00178					247.42	0.00153	0.00146	0.000346875	0.00010844
19.44	6.30412e-05	0.00174	4.52154e-05	0.00178					247.44	0.00152	0.00147	0.000409844	0.00017891
19.46	6.30188e-05	0.00174	4.50683e-05	0.00178					247.46	0.00153	0.00147	0.000412031	0.00010906
19.48	6.29882e-05	0.00174	4.49279e-05	0.00178					247.48	0.00152	0.00146	0.000364687	8.766e-05
19.5	6.295e-05	0.00174	4.47951e-05	0.00178					247.5	0.00154	0.00145	0.0003525	0.00014063
19.52	6.29046e-05	0.00175	4.46707e-05	0.00178					247.52	0.00153	0.00146	0.000396406	0.00017703
19.54	6.28529e-05	0.00175	4.45555e-05	0.00178					247.54	0.00151	0.00147	0.000372344	6.813e-05
19.56	6.27954e-05	0.00175	4.445e-05	0.00178					247.56	0.00149	0.00147	0.000346719	8.281e-05
19.58	6.27328e-05	0.00175	4.43548e-05	0.00178					247.58	0.00153	0.0015	0.000370313	0.00012563
19.6	6.26657e-05	0.00175	4.42703e-05	0.00178					247.6	0.00151	0.00147	0.000388594	0.00015641
19.62	6.25946e-05	0.00175	4.41968e-05	0.00178					247.62	0.00144	0.00149	0.00037875	0.000125
19.64	6.25202e-05	0.00175	4.41347e-05	0.00178					247.64	0.00148	0.00149	0.000370469	7.531e-05
19.66	6.24427e-05	0.00175	4.40841e-05	0.00179					247.66	0.00146	0.00148	0.000389375	0.00016016
19.68	6.23627e-05	0.00175	4.40451e-05	0.00179					247.68	0.00145	0.00151	0.000383125	0.00016016
19.7	6.22803e-05	0.00175	4.40176e-05	0.00179					247.7	0.00142	0.00151	0.000405469	8.5e-05
19.72	6.21957e-05	0.00176	4.40014e-05	0.00179					247.72	0.00143	0.00154	0.000400313	5.891e-05
19.74	6.21089e-05	0.00176	4.39965e-05	0.00179					247.74	0.00147	0.00152	0.000384531	0.00015531
19.76	6.20199e-05	0.00176	4.40023e-05	0.00179					247.76	0.00146	0.00151	0.0003925	0.00015031
19.78	6.19286e-05	0.00176	4.40187e-05	0.00179					247.78	0.00146	0.00152	0.000390156	6.172e-05
19.8	6.18348e-05	0.00176	4.4045e-05	0.00179					247.8	0.00147	0.00146	0.000415156	0.00010172
19.82	6.17381e-05	0.00176	4.40807e-05	0.00179					247.82	0.00149	0.00144	0.000370313	0.00016891
19.84	6.16382e-05	0.00176	4.41252e-05	0.00179					247.84	0.00151	0.00151	0.000359688	0.00012563
19.86	6.15346e-05	0.00176	4.41779e-05	0.00179					247.86	0.00147	0.0015	0.000371875	0.00010547
19.88	6.1427e-05	0.00176	4.42379e-05	0.00179					247.88	0.00151	0.00143	0.000386719	0.00016531
19.9	6.13149e-05	0.00176	4.43047e-05	0.00179					247.9	0.00153	0.00147	0.0003925	8.781e-05
19.92	6.11978e-05	0.00176	4.43773e-05	0.00179					247.92	0.00154	0.00154	0.000364219	9.078e-05
19.94	6.10755e-05	0.00176	4.44551e-05	0.00179					247.94	0.00151	0.00142	0.000344063	0.00013688
[truncated: 8,002 more rows]

## Sheet: Fig.2B
10		20		50		100		200		300			Bias light intensity(W/m2)	Rrec(Ω)
X(bottom)	Y(left)	X(bottom)	Y(left)	X(bottom)	Y(left)	X(bottom)	Y(left)	X(bottom)	Y(left)	X(bottom)	Y(left)		X(Top)	Y(right)
1.30524	0.50204	1.31	0.50252	1.35464	0.49284	1.4222	0.48908	1.52432	0.46408	1.60688	0.44256		0	12300
1.03128	1.83148	1.02976	1.82944	1.12356	1.81944	1.23228	1.76308	1.40872	1.67304	1.519	1.5716		10	16.7
1.11432	3.43856	1.13104	3.43668	1.30768	3.3582	1.50864	3.23688	1.75668	3.0024	1.919	2.76144		20	7.1
1.62732	5.5752	1.67552	5.5604	2.00708	5.3752	2.38856	4.9956	2.60016	4.5316	2.75156	4.1196		50	3.32
2.43916	8.7712	2.58124	8.7264	3.2296	8.1652	3.77656	7.306	4.188	6.2048	4.3928	5.4932		100	2.1
4.106	13.1236	4.5504	12.8428	5.494	11.5912	6.052	9.8236	6.1384	7.9556	5.9592	6.888		200	1.43
6.9336	18.6736	7.6696	18.3072	8.9252	15.3876	9.0928	12.3904	8.5876	9.712	8.0252	8.2508		300	1.27
10.7692	26.3696	12.6024	24.61	13.432	19.3348	12.818	15.0516	11.472	11.6252	10.3836	9.9496
16.9148	35.352	19.0072	32.1048	18.6844	24.3208	17.042	18.5664	14.9092	13.9856	13.5148	11.8852
24.2724	47.268	26.7236	41.424	25.4336	30.1748	22.6608	22.6768	19.636	16.6644	17.5932	13.9076
31.6824	66.308	37.8912	55.512	35.0568	38.474	31.3524	27.7764	25.5252	18.9788	22.6024	15.5804
45.684	88.444	52.992	72.876	49.556	46.124	41.268	30.3348	33.4048	19.7456	28.3548	15.9696
67.204	124.368	78.772	92.7	68.476	50.784	52.904	30.5148	40.4	18.6568	33.9064	15.2496
102.132	172.62	115.856	109.56	87.804	48.688	63.924	26.7544	46.236	16.1592	38.6476	13.8228
164.932	228.248	162.184	114.496	104.732	42.12	72.02	22.0868	50.804	12.9328	42.756	11.9252
262.54	273.852	206.344	103.944	116.764	33.5224	77.676	17.1924	54.012	10.05	46.04	9.7328
382.636	282.276	238.908	84.184	124.28	25.4792	81.264	13.1096	56.04	7.636	48.388	7.5604
492.52	250	259.9	64.256	129.152	19.2164	83.536	9.8748	57.416	5.7912	49.968	5.7528
569.88	196.016	272.78	46.984	132.468	14.3632	85.244	7.4668	58.384	4.3628	50.936	4.0988
615.32	145.204	280.788	35.192	134.792	11.298	86.504	5.9756	59.08	3.47264	51.536	3.09716
642.4	104.928	285.756	26.3824	136.7	9.1024	87.484	4.8972	59.636	2.86196	51.964	2.42168
660.48	77.196	290.628	20.544	138.24	7.2852	88.368	4.0884	60.136	2.44896	52.336	2.0446
668.2	55.464	293.24	14.7504	139.624	6.0952	89.116	3.48464	60.564	2.15068	52.64	1.7318
676.08	36.9516	296.196	13.716	140.56	5.2652	89.912	3.06264	61.004	1.97004	52.984	1.64796
683.08	38.6016	298.776	9.882	141.68	4.4424	90.428	2.6704	61.444	1.82292	53.32	1.56128
690.8	24.256	299.772	8.4576	142.332	3.59816	91.016	2.31708	61.88	1.70972	53.728	1.48008
697.32	19.7344	300.248	7.1452	142.416	3.18504	91.228	2.09676	62.176	1.55948	54.02	1.3794
704.32	15.9624	301.276	5.9164	142.66	2.67636	91.5	1.75988	62.444	1.34088	54.3	1.16912
708.68	12.8176	301.816	4.8692	142.764	2.22464	91.688	1.47084	62.64	1.10684	54.508	0.93536
713.16	10.256	302.04	4.0764	142.74	1.8474	91.74	1.22508	62.74	0.89736	54.604	0.72412
719.16	8.3688	302.112	3.44032	142.476	1.5734	91.672	0.98952	62.748	0.7282	54.588	0.54896
722	6.9392	301.82	3.077	142.188	1.4198	91.524	0.91292	62.68	0.62988	54.548	0.45588
725.16	6.2172	301.184	2.87324	141.756	1.4096	91.308	0.88696	62.62	0.62172	54.412	0.42244
730.48	5.8608	300.172	2.9612	140.78	1.53708	90.904	1.03976	62.364	0.7236	54.232	0.42208
733.96	5.568	298.784	2.96692	139.952	1.64976	90.556	1.15456	62.18	0.81092	54.044	0.42896

## Sheet: Fig.2C
							inset
Frequency(Hz)	50	100	200	300			Frequency(Hz)	50	100	200	300
100000	4.8565e-05	3.5147e-05	2.3896e-05	1.4382e-05			100000	0.11858	0.1914	0.26925	0.25587
79813	4.9699e-05	4.0585e-05	2.4169e-05	1.5714e-05			79813	0.12182	0.22297	0.27251	0.27972
63701	5.5536e-05	4.043e-05	2.0429e-05	1.4522e-05			63701	0.1385	0.22207	0.22785	0.25838
50841	5.3154e-05	3.7299e-05	2.1845e-05	1.3991e-05			50841	0.13169	0.20389	0.24476	0.24887
40578	5.7169e-05	3.8687e-05	2.1856e-05	1.4457e-05			40578	0.14316	0.21195	0.24489	0.25721
32386	5.7457e-05	4.3427e-05	2.4272e-05	1.3959e-05			32386	0.14398	0.23947	0.27374	0.2483
25848	6.3282e-05	3.9089e-05	2.2143e-05	1.548e-05			25848	0.16063	0.21429	0.24832	0.27553
20630	6.7579e-05	4.078e-05	2.3699e-05	1.5781e-05			20630	0.1729	0.2241	0.2669	0.28092
16465	6.6232e-05	4.2473e-05	2.4855e-05	1.7212e-05			16465	0.16905	0.23394	0.2807	0.30653
13142	7.2089e-05	4.5588e-05	2.6834e-05	1.8859e-05			13142	0.18579	0.25202	0.30433	0.33602
10489	8.0977e-05	5.162e-05	2.9939e-05	2.1449e-05			10489	0.21118	0.28705	0.34141	0.38238
8371.3	8.9874e-05	5.7701e-05	3.4689e-05	2.5087e-05			8371.3	0.2366	0.32235	0.39813	0.44751
6681.3	0.00010384	6.7608e-05	3.9545e-05	2.9142e-05			6681.3	0.27649	0.37988	0.45612	0.5201
5332.5	0.00011764	7.7046e-05	4.7167e-05	3.3613e-05			5332.5	0.31592	0.43468	0.54714	0.60013
4256	0.00014036	9.0293e-05	5.4871e-05	3.9585e-05			4256	0.38083	0.51159	0.63914	0.70704
3396.9	0.00016613	0.00010523	6.1991e-05	4.5021e-05			3396.9	0.45445	0.59832	0.72416	0.80435
2711.1	0.00019879	0.00012083	6.9793e-05	5.0185e-05			2711.1	0.54776	0.6889	0.81733	0.8968
2163.8	0.00022787	0.0001387	7.7822e-05	5.4023e-05			2163.8	0.63083	0.79266	0.91321	0.9655
1727	0.00026527	0.00015382	8.2274e-05	5.595e-05			1727	0.73768	0.88045	0.96637	1
1378.4	0.00029733	0.00016706	8.509e-05	5.5565e-05			1378.4	0.82927	0.95732	1	0.99311
1100.1	0.00032823	0.00017441	8.3137e-05	5.3422e-05			1100.1	0.91755	1	0.97668	0.95475
878.03	0.00034848	0.00017433	7.8252e-05	4.9317e-05			878.03	0.9754	0.99954	0.91834	0.88126
700.78	0.00035544	0.00016767	7.0268e-05	4.2901e-05			700.78	0.99529	0.96087	0.823	0.7664
559.31	0.00035709	0.00015118	6.2768e-05	3.7201e-05			559.31	1	0.86512	0.73344	0.66437
446.4	0.00032944	0.00013436	5.3402e-05	3.0145e-05			446.4	0.92101	0.76746	0.6216	0.53805
356.28	0.00029992	0.00011538	4.3356e-05	2.5157e-05			356.28	0.83667	0.65725	0.50163	0.44876
284.36	0.00026076	9.7941e-05	3.5229e-05	1.9902e-05			284.36	0.7248	0.556	0.40458	0.35469
226.96	0.00022744	7.9677e-05	2.7719e-05	1.5658e-05			226.96	0.62961	0.44995	0.3149	0.27871
181.14	0.00019187	6.6062e-05	2.2078e-05	1.2532e-05			181.14	0.52799	0.3709	0.24754	0.22275
144.57	0.00015845	5.3349e-05	1.807e-05	9.5474e-06			144.57	0.43251	0.29708	0.19968	0.16933
115.39	0.0001311	4.4504e-05	1.416e-05	7.0269e-06			115.39	0.35437	0.24573	0.15299	0.1242
92.093	0.00010279	3.468e-05	1.1634e-05	5.7904e-06			92.093	0.2735	0.18869	0.12282	0.10207
73.502	8.6134e-05	2.7183e-05	8.7104e-06	4.6138e-06			73.502	0.22591	0.14516	0.08791	0.08101
58.786	7.0026e-05	2.3355e-05	6.8938e-06	3.663e-06			58.786	0.17989	0.12293	0.06622	0.06399
45.561	5.5337e-05	1.7364e-05	4.909e-06	2.3964e-06			45.561	0.13793	0.08814	0.04252	0.04131
33.889	4.0397e-05	1.2815e-05	3.6484e-06	1.7215e-06			33.889	0.09525	0.06173	0.02746	0.02923
23.905	2.5507e-05	7.3024e-06	2.3562e-06	1.2323e-06			23.905	0.05271	0.02972	0.01203	0.02047
15.849	1.4485e-05	4.0024e-06	1.9843e-06	6.6013e-07			15.849	0.02122	0.01056	0.00759	0.01023
10	7.0579e-06	2.1831e-06	1.3487e-06	8.8661e-08			10	0	0	0	0

## Sheet: Fig.2D-dark
0	-2.00667	-1.892	-1.792	-1.69201	-1.59201	-1.49199	-1.392	-1.292	-1.192	-1.09201	-0.98934	-0.89199	-0.79067	-0.69068	-0.592	-0.49201	-0.39201	-0.29067	-0.19199	-0.092	0.008	0.02799	0.04665	0.07201	0.09332	0.12	0.14533	0.17333	0.20133	0.23335	0.26534	0.3	0.33601	0.37467	0.41467	0.45735	0.50134	0.54933	0.59867	0.65334	0.70667	0.76667	0.82933	0.89334	0.96267	1.03733	1.112	1.19333	1.27733
599.434	4.83445e-05	0.000278357	-9.12381e-06	0.000140668	-8.43249e-05	-0.00014079	9.1262e-05	0.000116609	0.000193788	-5.59938e-05	-9.48586e-05	-0.000193509	-0.000159421	0.000117577	-0.000248585	-0.000172805	-4.84493e-05	1.10938e-05	-3.5925e-05	0.000147753	-2.94832e-05	-0.000117607	0.000173946	-3.68175e-05	0.000111656	-3.16671e-05	0.000189484	9.57617e-05	-6.83471e-05	0.000266774	0.000162236	0.000190544	7.75869e-05	2.60926e-05	0.000354315	-2.76335e-05	-3.85373e-05	-0.000318613	-1.30663e-05	-8.39897e-05	8.9797e-05	0.000318954	0.000754138	0.000990514	0.00114	0.00163	0.00165	0.00238	0.00224
600.615	0.000194097	-7.84833e-05	-0.000255079	-0.000236456	0.000109983	0.00014146	0.00023091	0.00015558	5.28653e-05	-7.26257e-05	-0.00015523	9.19779e-05	-7.71037e-05	-0.000216082	0.000114185	0.000187343	0.000178739	0.000129847	-1.8656e-05	0.000186046	-0.000185296	0.000227737	2.86508e-06	0.00014749	-1.66631e-05	5.27992e-05	0.000120173	8.98429e-05	0.000403028	5.237e-05	0.000171497	0.000167372	0.000120897	0.000310518	0.000308722	6.8589e-05	5.49717e-05	-0.000200665	-0.000155386	-4.80732e-05	0.000220376	0.000397787	0.000659229	0.0011	0.00113	0.00152	0.00187	0.00232	0.00231
601.797	-0.000111627	-0.000116657	9.17711e-05	8.29836e-05	-1.68177e-05	-4.17945e-05	-9.84149e-05	0.000213251	2.33049e-05	-4.50716e-05	5.96172e-05	0.000114474	-0.000131174	5.49416e-06	-2.93401e-05	-0.000385302	0.000260432	7.7437e-05	-0.000127091	0.000163562	-4.99904e-06	-0.000260649	0.000123743	-0.000251179	-0.000113525	-0.000165457	2.53111e-05	5.56996e-05	-7.26183e-05	7.60957e-05	-0.000111596	-2.32036e-05	-0.000188371	-0.000178357	7.72298e-05	-9.66248e-05	-0.000236864	-0.000231215	-0.000338989	-0.000206049	2.62405e-07	0.000445739	0.000639661	0.000803392	0.000960668	0.00134	0.00176	0.00214	0.00204
602.978	1.10487e-05	0.000143275	-0.000176652	-0.000104382	-0.000252715	-0.000141159	-1.84325e-05	9.92114e-05	2.21234e-05	4.31727e-05	0.000105309	4.32278e-06	4.87586e-05	0.000168451	4.76681e-05	0.000167996	0.000182465	0.000109818	-7.31242e-05	0.000105362	0.00012357	-8.87011e-05	0.000150107	9.56355e-05	4.67331e-05	0.000159257	-0.000172058	-7.18467e-05	0.000269299	9.53574e-05	0.000258774	-2.88993e-06	7.60713e-05	0.000179039	0.000183273	4.41567e-05	-0.000190526	-0.000320441	-0.00028819	-8.06805e-05	9.76436e-05	0.000107235	0.000599018	0.000963393	0.000924604	0.00132	0.00189	0.0022	0.00214
604.16	0.000122606	3.36935e-05	-0.00028003	0.000113304	2.37622e-05	-7.22062e-05	-0.000225733	7.23958e-05	-6.90612e-05	-0.000129917	9.92915e-05	0.000347858	-5.45362e-05	-0.000126674	0.000145247	-8.8717e-08	0.000153966	0.000111366	4.65406e-05	0.000307214	-0.000197052	-0.000357339	-0.000174004	-3.53957e-05	-0.000227658	-4.61474e-05	-0.000117974	-0.000142839	0.000202819	3.95112e-05	5.59271e-06	0.000137465	-1.54849e-05	-2.31204e-05	-5.68231e-05	-0.000141058	-1.16837e-05	-0.00034262	-0.000248048	4.17672e-05	-5.35803e-05	0.000143131	0.000523481	0.000845998	0.00119	0.0013	0.00157	0.00224	0.00221
605.342	-8.30329e-05	0.000100298	-7.52012e-05	0.000120273	8.62573e-05	1.99364e-05	5.20701e-05	-0.000174513	9.04079e-05	6.66669e-05	4.16152e-05	-0.000200341	-9.3251e-05	0.000132476	-8.36622e-05	-0.000242076	-1.67597e-05	0.000105574	-1.11276e-05	8.95683e-05	-7.83661e-05	-0.000158216	4.89549e-05	-0.000143541	2.75123e-05	0.000325161	-0.000212134	7.93197e-05	-7.91338e-05	5.27497e-05	-2.33851e-05	0.000140082	4.91682e-06	8.79224e-05	0.000375826	0.000238041	9.78124e-05	-0.000339922	-0.00013053	3.94978e-05	-0.000294071	0.000202134	0.000365635	0.000701257	0.00136	0.00142	0.00169	0.00223	0.00218
606.524	4.19715e-05	-5.66845e-05	-0.000162562	-9.26129e-07	-0.000187108	0.000136401	0.000146123	-0.000177475	-9.34653e-05	0.000247836	0.000219387	-4.05388e-05	-0.000285889	0.000278022	-6.50919e-05	-8.95173e-05	-0.000145652	0.000138378	0.000116784	0.000303502	-0.000133975	2.44541e-05	-1.61832e-06	-4.79448e-05	-8.90521e-05	-8.86358e-05	7.7608e-06	-4.27976e-05	8.10195e-05	5.20382e-05	2.10159e-05	-1.95088e-05	-6.815e-05	0.000107361	0.000171047	0.000162664	0.000178412	-0.000411347	-0.000411564	4.82001e-05	-0.000196449	0.000133957	0.000437534	0.000516368	0.00125	0.00158	0.00143	0.00206	0.00215
607.706	0.000188187	-0.000155884	5.1298e-05	-1.29728e-05	-0.000349802	0.000136894	-0.000133983	0.000113751	7.39382e-05	4.49615e-06	0.000260929	-0.00010805	-1.74187e-06	6.03845e-05	-0.000127443	3.63249e-05	3.83971e-05	0.000396299	5.21395e-05	-4.92467e-05	-0.000132494	-7.42969e-07	-3.39201e-05	2.86984e-05	6.16691e-05	-0.000259615	0.000102768	-3.33041e-05	3.51144e-05	-0.000165941	3.59211e-05	0.000149563	2.75991e-06	7.12036e-05	0.000227174	-1.18524e-06	-9.3131e-05	-0.000423137	-0.000310646	-0.000199993	5.49901e-05	0.000155303	0.000115584	0.000784371	0.00103	0.00141	0.00156	0.0021	0.00193
608.888	0.000104841	-9.88773e-05	4.4594e-05	3.70347e-05	-4.11725e-05	-6.54905e-05	0.000120065	0.000111794	2.44484e-05	-0.000303499	-1.92737e-06	9.53486e-05	0.000167001	-6.99475e-05	-0.000124213	-0.00018909	-1.12151e-05	-8.12905e-05	-0.000136551	5.58765e-06	-6.65369e-05	0.000128677	-0.000140901	-0.00014011	-8.48037e-05	-5.52415e-05	3.33014e-05	-4.08759e-05	-0.000118403	-9.52142e-06	0.000121905	0.000259409	7.46832e-05	0.000205642	3.2502e-05	-7.8663e-05	7.36547e-05	-0.000265918	-0.000288513	-0.000219449	-8.12049e-05	2.27383e-05	0.000267229	0.000826826	0.000962462	0.0013	0.00167	0.00203	0.00201
610.071	0.000105499	-8.95614e-05	-0.00018202	1.77809e-05	0.000330918	-0.000107367	0.000122896	-9.33289e-05	4.4685e-05	4.6044e-05	3.27422e-05	-0.00012319	-0.000239243	2.01882e-05	0.000113957	3.65409e-06	0.000232086	-2.25711e-05	-9.45332e-05	0.000136657	-6.06174e-05	0.000120242	-0.00010755	-0.00011653	3.67529e-05	-4.85458e-06	-7.00158e-05	8.16833e-05	3.2278e-05	-0.000172928	0.000143773	0.000147913	1.16271e-05	4.52324e-05	0.000122334	-0.000154655	0.000141637	-0.000237463	-0.000409164	-0.000258393	-5.68789e-05	5.59627e-05	0.000422833	0.000670881	0.00095534	0.00138	0.00156	0.0019	0.00204
611.253	5.96992e-05	5.75118e-05	-0.000184194	0.000132429	0.000138418	-0.000193425	-2.40792e-05	-5.04106e-05	0.000206525	-4.75193e-05	2.00096e-05	-0.000227366	7.19404e-05	-1.33008e-05	5.37613e-05	-2.07269e-05	0.000264546	0.000168554	-7.86624e-05	-0.000196682	-0.000187005	0.000125368	-0.000129036	-0.00021437	-0.000307011	-0.000272232	7.26944e-05	-5.55106e-05	-0.000140104	-6.03146e-05	-2.71597e-05	2.9108e-05	9.83498e-05	6.6046e-05	-6.26625e-06	0.000214631	-0.000286963	-0.000475189	-0.000502928	-0.000201749	-0.000361411	-3.46482e-05	0.000177548	0.000444412	0.000737809	0.00109	0.00152	0.00183	0.00193
612.436	2.50181e-05	0.000295025	-0.000186514	-9.42601e-05	-5.44896e-05	-0.00010468	0.000105998	-6.85169e-05	0.000149101	-9.53055e-05	-2.21088e-05	-1.15122e-05	8.75411e-05	-1.49215e-05	-1.03743e-05	-0.000121649	0.000144924	-0.000123062	-6.05973e-05	-0.000103273	8.23946e-05	-0.000105644	5.56907e-05	5.22174e-05	-0.000148126	-3.08583e-05	0.000105751	-0.000130197	-0.000135329	1.22774e-05	-2.34196e-05	6.33797e-05	-8.85032e-05	-0.000137803	0.000243143	8.58528e-05	-0.000301365	-0.000107335	-0.000467462	-0.00033157	-0.000134595	0.000161718	0.000349917	0.000423763	0.000742328	0.00106	0.00135	0.00191	0.00214
613.619	0.00019555	2.44559e-05	-0.00012313	8.98617e-05	-3.91963e-06	-8.56979e-05	0.000162869	-9.06558e-05	4.94517e-05	-8.3876e-05	7.82559e-05	-0.000131505	9.72701e-05	-6.11069e-05	-0.000117824	0.000210946	8.58947e-05	-1.84684e-05	-4.76746e-05	-0.000292019	-5.66382e-05	-1.83077e-05	-0.000200828	-7.03344e-05	2.55307e-05	8.12654e-05	0.000217306	-0.000127206	-1.04805e-05	3.63937e-05	8.02017e-05	0.000137743	7.17472e-06	8.65507e-05	-7.49696e-06	-4.93329e-05	-0.000145731	-0.000277467	-0.000332093	-0.000188658	-0.000278048	-0.000258068	0.000119052	0.000548829	0.000754722	0.00102	0.00161	0.00172	0.00192
614.802	-2.17756e-05	5.4495e-05	-0.0002362	-2.58954e-05	7.21114e-05	-4.44856e-05	-0.000127983	0.000158425	-7.08477e-05	8.9154e-05	-3.29293e-05	-2.11212e-05	3.56809e-05	-2.1178e-05	0.00019255	-0.000209166	0.000271499	-0.000141354	-4.00084e-05	9.62264e-05	-2.06875e-05	-7.42656e-05	7.02703e-06	-0.000105084	3.98028e-05	0.000267448	-7.9835e-05	-0.000140887	-6.22046e-06	0.000114294	7.09763e-06	6.22275e-05	2.68159e-05	-5.05619e-05	-0.000118773	-5.75895e-06	-4.27232e-05	-0.000456282	-0.000520443	-0.000469247	-0.000206432	-0.000107946	2.24461e-05	0.000573723	0.000646332	0.00102	0.00132	0.00175	0.002
615.985	-6.19647e-05	-9.04195e-05	2.70655e-05	-0.0002465	0.00010423	0.00017978	7.05986e-05	0.000104378	2.18728e-05	3.41032e-06	-1.69338e-05	-1.49705e-05	-2.27637e-05	-0.000104696	4.69131e-05	-1.82248e-05	0.000196216	0.000141473	0.000105019	0.000156699	-5.68474e-05	7.26081e-06	-7.36479e-05	-5.25991e-05	-1.34252e-05	5.68923e-06	0.000134719	1.13207e-05	5.33533e-05	0.000118041	0.000220537	8.89379e-05	-0.000118547	0.000140462	-6.19574e-05	6.25013e-05	4.73649e-05	-0.000354161	-0.000521366	-0.000312885	-0.000427477	-6.58971e-05	0.000209886	0.000216834	0.000598241	0.000760133	0.00146	0.00203	0.00194
617.168	1.42344e-05	-1.41125e-05	-3.59432e-06	-6.46471e-05	0.000116802	0.000208329	-8.74695e-05	-0.00014403	-9.80812e-05	7.73835e-05	0.000106121	-3.56966e-05	-5.78217e-05	6.20891e-05	-7.95058e-05	-7.77724e-05	0.000108451	1.64474e-05	9.08915e-05	-0.000135938	-2.886e-05	-0.000270489	-3.17293e-06	-0.000144686	4.15119e-05	-2.87625e-05	-0.000165424	-5.19356e-06	-0.000109236	-4.82512e-05	6.6269e-05	0.000168695	1.71651e-05	-0.000135414	6.44305e-05	4.91781e-05	6.04113e-05	-0.000296792	-0.00042527	-0.000244865	-0.000365145	-0.000227388	0.000230822	0.000447393	0.000278416	0.000896802	0.0011	0.00175	0.00192
618.351	-0.000150966	-2.86608e-05	6.83907e-05	3.52179e-05	0.000137467	6.13138e-06	-0.000193344	-0.000257421	0.000130708	5.50351e-05	5.42559e-06	6.17833e-06	0.000239091	-0.000160788	0.000107536	9.55559e-06	-4.52334e-05	6.22034e-05	-0.00017929	-6.73281e-05	-9.52613e-05	-8.81128e-05	-0.000239334	7.63416e-05	6.1243e-05	-0.000169418	-7.78492e-05	-0.000136685	-0.000267731	-1.81761e-05	9.6151e-05	5.92723e-05	-0.000181771	-0.000108793	4.65262e-05	6.59748e-05	-0.000163535	-0.000471177	-0.000296037	-0.00046052	-0.000212161	-0.00017346	-4.13776e-05	0.000287559	0.000307277	0.000878717	0.0013	0.0016	0.00177
619.535	5.83305e-05	-8.04127e-05	0.000129058	2.08852e-05	-0.000160507	-4.67986e-05	-5.35386e-05	-5.22864e-05	0.000113293	-0.000160358	1.66398e-06	2.42554e-05	2.92348e-05	0.000182566	-5.38644e-06	-8.48295e-07	-1.74653e-05	8.80862e-05	1.96045e-05	-8.43569e-05	-3.68918e-05	-4.62895e-05	-7.94221e-05	0.0002115	-0.000215323	-8.91635e-05	1.92897e-05	0.000112994	0.000147788	-0.000123772	0.000280066	0.000264895	-1.81269e-05	0.000108541	-1.29111e-06	0.000134177	-5.99545e-05	-0.000147696	-0.000459462	-0.000398852	-0.000332609	-0.000544644	-1.93306e-05	0.000292847	0.00050587	0.000794221	0.00141	0.00178	0.00206
620.718	8.0674e-05	-0.000173736	-2.8066e-05	-3.44252e-05	1.90498e-06	2.57505e-05	0.000288946	0.00018026	0.000170555	-0.000260832	-8.09566e-05	0.000153831	-9.25984e-05	-0.000133125	-9.81822e-05	0.000223249	8.3357e-05	6.89863e-05	0.000192088	9.69505e-05	-2.46797e-05	-9.6017e-05	4.76196e-05	-6.51967e-05	1.32182e-05	-5.73745e-05	0.000314676	-2.40998e-06	8.19815e-05	0.00013653	0.00013883	0.00021282	0.000119537	-2.05364e-05	0.000124805	-7.11971e-05	0.000212317	-0.000460927	-0.000395683	-0.000524537	-0.000335297	-0.000461575	-0.000169392	0.000235227	0.000646345	0.00101	0.0014	0.0017	0.00209
621.902	3.18285e-05	0.000134793	-0.000297839	8.17734e-05	-1.83639e-05	2.14045e-05	0.000156204	7.29315e-05	9.99293e-05	-9.4428e-05	-0.000127399	-6.03364e-05	-0.000107629	0.000104972	2.15995e-06	-6.1038e-05	1.87678e-05	4.27131e-05	-0.000125142	0.000220989	-0.000132456	6.58373e-05	-8.64709e-05	-2.03852e-05	-7.77035e-05	-0.000142463	4.87179e-05	3.10086e-05	-5.00142e-05	7.67073e-05	8.92025e-05	0.000183029	8.49256e-05	0.00018012	0.000150026	0.000103987	-2.62072e-05	-0.000430444	-0.00058693	-0.000429727	-0.000402975	-0.000376305	2.37844e-05	0.000179787	0.000510868	0.00102	0.00138	0.00173	0.00186
623.086	2.46391e-06	0.00012019	-5.02115e-05	2.82144e-05	-2.48893e-06	-0.000204194	0.000105335	0.000204169	0.000204447	-0.000157278	-0.000166273	6.27166e-05	-0.000105674	9.95297e-06	-5.13691e-05	-8.69299e-06	0.000187562	1.74127e-05	6.89797e-05	7.18318e-05	-7.1388e-05	-2.98981e-05	-4.84291e-05	9.09309e-05	0.000183364	7.02904e-05	7.97513e-05	7.26025e-05	0.000153413	0.000118519	4.94204e-05	0.000111288	0.000156793	-3.83695e-05	0.000147643	7.39088e-05	-9.47373e-05	-0.00042362	-0.000545339	-0.000551916	-0.000589024	-0.000476409	3.17132e-05	8.42514e-05	0.000503342	0.000817528	0.00117	0.00156	0.00191
624.27	-6.46608e-06	1.56083e-05	-5.00632e-05	9.54802e-05	-1.55081e-05	-3.02996e-06	5.96341e-05	8.43988e-05	9.8011e-05	-4.0492e-05	-0.000245623	2.0732e-06	-0.000169563	-1.33957e-05	0.000188935	0.00015749	0.000102482	5.93635e-05	8.27203e-05	5.87642e-05	-6.06674e-05	0.00014176	4.89407e-06	1.62343e-05	-0.000221234	7.37747e-06	0.00019703	-0.000161763	-4.78468e-05	-4.6687e-05	0.00018017	-1.30679e-06	-0.00011575	8.79719e-05	0.000164131	-5.71449e-06	0.000238577	-0.000593853	-0.000620386	-0.000552689	-0.000767549	-0.00062631	-0.000242252	0.000120126	0.000326699	0.000535599	0.00123	0.00157	0.00178
625.454	-0.000144446	-4.55052e-05	-0.000110011	3.69553e-05	2.24287e-05	6.38627e-05	-2.09983e-05	0.000114805	5.10031e-05	0.000134308	-3.58939e-05	6.14702e-05	-9.6128e-05	3.3095e-06	-3.51607e-05	-0.000133916	7.86945e-05	8.7097e-05	7.00808e-05	2.89858e-05	-7.25886e-05	-9.70005e-05	0.000140435	-9.96773e-05	-9.11281e-05	2.32764e-06	2.37378e-05	-6.89053e-05	9.02623e-05	8.41833e-05	9.77684e-05	-5.09683e-05	-0.000140164	-3.50024e-05	0.000199569	-3.01428e-05	0.000171601	-0.000381839	-0.000656538	-0.000544711	-0.000686713	-0.000376001	-0.000178405	-5.55352e-05	0.000507916	0.000586409	0.00122	0.00154	0.00176
626.638	-1.49558e-07	-4.60397e-06	-4.15353e-05	8.06217e-05	0.000142593	5.16198e-05	5.38267e-05	0.000127772	0.000107204	-0.000177564	-7.47858e-06	-2.97696e-06	-1.82093e-06	-0.000126115	-0.000201393	-6.1383e-05	-8.95178e-05	-2.20977e-06	-8.90547e-05	-1.12557e-05	-0.000259386	-7.22664e-05	5.71033e-05	-5.41807e-05	-9.10903e-06	4.70903e-05	4.65029e-06	-7.4093e-06	-0.000121916	2.41855e-05	-4.53902e-05	6.97417e-05	0.00011569	8.10059e-05	0.000133449	-0.00012076	-0.000195773	-0.000265133	-0.000399447	-0.000441958	-0.000647652	-0.000506264	-0.000416083	-0.000244276	0.000354498	0.000500525	0.000983517	0.00153	0.0016
627.823	-1.01433e-05	-0.000181221	-0.00011492	0.000272532	-0.000150437	-2.27034e-05	0.0003268	3.15151e-05	-1.44385e-05	-0.000135925	-3.75345e-05	1.8048e-05	-9.15136e-05	0.00012753	-1.75862e-05	7.76572e-05	0.000287666	0.000387404	0.000229836	0.00021318	-1.65283e-05	7.06187e-05	-5.12738e-05	7.95255e-05	0.000132111	0.000222592	5.00925e-05	0.0002507	-3.80329e-05	0.000168861	0.000101628	0.000158745	0.000131822	0.000380672	0.000169858	-7.71405e-06	-5.67434e-05	-0.000365766	-0.000576713	-0.000532595	-0.00050493	-0.00043102	-0.000250722	-9.36897e-05	0.00022654	0.000569003	0.000992223	0.00163	0.00175
629.007	-4.41033e-05	0.000167578	-0.000170372	4.65535e-05	0.00019134	-4.16272e-05	1.90313e-05	0.000133883	-3.74536e-05	1.52177e-05	-8.93873e-05	6.85385e-05	-0.000207445	-2.20399e-05	-2.97139e-05	-7.88928e-05	-6.40371e-06	0.000134315	-5.47325e-05	-5.40883e-05	-0.000137118	0.00012357	1.39683e-05	2.3606e-05	2.4622e-07	-7.96631e-05	-0.000144963	5.48299e-05	-6.41338e-05	9.17646e-05	5.75035e-05	-4.77905e-05	-5.35541e-05	-3.38849e-05	0.000114307	0.000189611	3.78934e-05	-0.000300679	-0.000561999	-0.000611861	-0.000719554	-0.000471972	-0.000408674	-0.000407248	0.000323123	0.000501437	0.000909373	0.00153	0.0016
630.192	-0.000150905	-2.72383e-05	-1.44644e-05	5.88149e-05	0.000142336	0.000180646	-0.000162696	7.98016e-05	0.000242673	5.62441e-05	4.15869e-05	-0.000151508	-9.53804e-05	-0.000112669	-8.72424e-05	-0.000118835	-0.000253768	5.10186e-05	3.40652e-05	-6.41084e-06	-0.000154409	-0.000104307	-0.000115677	-9.60468e-05	-0.000151004	2.82962e-06	5.36223e-05	-3.07858e-05	9.08859e-06	-6.40646e-05	4.06255e-05	3.15447e-05	-4.19518e-05	-4.93649e-05	-5.60412e-05	2.16939e-05	-6.84132e-06	-0.000318101	-0.000624754	-0.000647795	-0.000695919	-0.000654883	-0.000503154	-0.000255098	0.00010665	0.000303506	0.000918823	0.00145	0.00166
631.377	8.52722e-06	0.000156418	-3.32393e-05	-5.04263e-05	3.78375e-05	2.55356e-05	-4.81485e-05	-8.21123e-05	-1.24319e-05	5.06641e-05	-0.000114081	2.42976e-05	-0.000100169	0.000135582	1.74624e-06	1.10921e-05	5.41681e-05	-5.2988e-05	-4.74005e-05	1.04075e-07	-5.48883e-06	-3.00962e-05	-0.000176888	-1.3544e-05	-0.000130117	2.61231e-05	0.000129654	1.45325e-05	-0.000176026	0.000121355	2.19964e-05	5.12572e-05	5.03317e-05	4.08597e-05	-0.000149864	4.37876e-05	-0.000250216	-0.000379185	-0.000666764	-0.000808576	-0.000600136	-0.000544151	-0.000589136	-7.08255e-05	0.000120894	0.000443266	0.000896403	0.00132	0.00189
632.562	-1.67907e-05	0.000100309	4.17524e-05	-0.000136778	8.50398e-05	-1.32854e-05	-9.45161e-05	0.000138245	4.64255e-05	-0.000128055	5.62923e-05	-0.000173431	-0.000113179	0.000130606	7.73664e-05	-0.000120528	0.000119167	4.96815e-05	-4.93891e-05	-0.000139777	-9.88256e-05	4.40023e-05	-1.6207e-05	0.00011779	-8.41833e-05	3.48e-06	0.000137789	9.99652e-05	-4.58528e-05	7.25403e-05	0.000133384	-0.000134825	8.4011e-06	4.43809e-05	-8.79182e-05	-8.61294e-05	-6.83202e-05	-0.000653247	-0.000785208	-0.000605182	-0.000798931	-0.000763579	-0.000425474	-0.000305708	5.17245e-05	0.00039918	0.000932972	0.00127	0.00139
633.747	3.62468e-05	-6.999e-06	-8.92971e-06	-6.24526e-05	-0.000116033	4.86368e-05	-2.97953e-05	-1.85828e-05	4.79992e-05	-6.38542e-06	-0.000103975	0.000311465	-5.48915e-05	1.58189e-05	-5.21227e-05	-0.000167946	7.31732e-05	1.94365e-05	-0.000154905	-2.52972e-06	-4.2756e-05	-0.000129652	-0.00018414	-3.57072e-05	-2.47328e-05	6.24106e-05	3.23303e-05	0.000116248	6.35718e-05	0.000192553	-0.000122272	-0.000124876	6.00779e-05	-0.000188642	9.68334e-05	8.87974e-05	1.21413e-05	-0.000348673	-0.000722935	-0.000856088	-0.000811618	-0.000683583	-0.000509207	-0.000512884	-0.000252393	0.000293903	0.000874377	0.00119	0.00148
634.932	0.000107229	6.32187e-05	-0.000114919	8.16637e-05	-8.18044e-05	5.03013e-05	2.94919e-06	2.01099e-05	-0.000113615	4.944e-05	-0.000194431	4.37867e-05	-8.73757e-05	0.000112452	6.09952e-05	1.644e-05	0.000219261	0.000194378	4.92603e-05	1.25523e-05	8.38506e-05	3.43426e-05	-0.000104892	-3.96208e-05	-4.25943e-05	-0.000164784	-0.000109901	1.59504e-05	5.04863e-05	0.000143052	0.000182093	0.000158439	0.000186175	2.55894e-05	0.000126967	0.000141939	0.000110781	-0.000275633	-0.000687258	-0.00066546	-0.000847591	-0.000687577	-0.000616855	-0.00026292	-8.68995e-05	0.00018884	0.000679986	0.00105	0.00153
636.117	1.85781e-05	6.59345e-06	3.51783e-05	7.70229e-05	0.000209431	-7.62903e-05	-3.27377e-05	-3.3296e-05	0.000112204	-0.000158064	4.67995e-05	-0.000221659	-0.000151553	2.06635e-05	0.00014713	-3.58461e-05	5.70503e-05	0.000185583	2.15945e-06	1.00929e-05	-1.57e-05	-8.32703e-05	-3.69579e-05	3.02864e-05	-1.5424e-05	-9.18078e-05	0.000159177	-5.44885e-05	1.28995e-06	0.000170299	5.39847e-05	0.000238142	3.25226e-05	0.000102767	0.00022087	0.000111097	-0.000175087	-0.000484811	-0.000675981	-0.000530691	-0.00086538	-0.000925266	-0.000696859	-0.000383708	8.61494e-05	0.000271405	0.000772063	0.00117	0.00144
637.303	6.7724e-05	9.31892e-05	-0.000220584	9.42542e-06	0.00026323	-3.47079e-05	-0.000149366	7.87878e-05	-4.74595e-06	-9.85989e-05	2.06839e-05	4.32919e-05	5.7734e-05	-4.80214e-05	-7.80422e-05	-0.000198737	4.63087e-05	9.6735e-05	-0.000131175	6.36889e-05	-8.58212e-05	7.32681e-05	-0.000160181	4.10641e-06	-7.69379e-05	-3.04137e-05	-3.1408e-05	-9.66252e-05	-1.09026e-05	-4.46287e-05	-2.14135e-05	0.00021286	7.81883e-05	-2.71191e-06	3.81623e-05	-0.000260316	-1.2137e-05	-0.000388597	-0.000693076	-0.000769714	-0.000780051	-0.000889567	-0.000799416	-0.000500456	-0.000359061	0.000117977	0.000645373	0.00101	0.00144
638.489	3.63789e-05	0.000122048	-7.52145e-05	4.80801e-05	8.89066e-05	-8.48755e-05	-9.17297e-05	-2.93217e-05	4.69374e-07	-4.5795e-05	7.53203e-05	-8.76972e-05	1.26915e-05	-7.16356e-06	3.79025e-05	-9.20369e-05	5.12781e-05	3.53265e-05	-2.74716e-05	9.40216e-05	8.66016e-05	-0.000108109	3.23e-06	-6.75996e-05	-2.90413e-05	-9.62949e-05	-0.000111279	-6.51213e-05	-0.000147519	0.000102661	-1.0219e-05	-2.36186e-05	-7.92082e-05	-7.49917e-05	-0.000157955	-0.000156657	-9.63087e-05	-0.000460242	-0.000791329	-0.000745013	-0.00103	-0.00102	-0.000837394	-0.000617981	-0.000265159	-4.19776e-05	0.000602681	0.000849749	0.00132
639.674	-6.16826e-05	0.000297604	-0.000255057	7.80432e-05	-2.39072e-05	-0.000210004	-3.10135e-05	2.41831e-05	5.94956e-05	9.93766e-05	-8.40407e-05	4.11967e-05	-4.30973e-05	0.000109007	-1.04773e-07	3.01578e-05	0.000248294	-0.000149085	-0.000109153	-5.45336e-05	-4.09499e-05	-8.2812e-05	-5.85519e-05	0.000178839	-3.89816e-05	-8.71011e-05	0.00011563	-7.51925e-05	-7.41218e-05	6.84301e-05	0.00010911	0.000144585	-1.3855e-05	-6.79957e-05	-6.48574e-05	-0.000184822	-6.30936e-05	-0.000314405	-0.000837823	-0.00103	-0.000892991	-0.00112	-0.000926066	-0.000557274	-0.000457158	-0.000168965	0.00045206	0.000946812	0.00128
640.86	6.58478e-05	-6.65741e-05	1.36549e-06	-0.000114633	1.03318e-05	-0.000115321	-6.50297e-05	8.27188e-05	-5.30754e-06	2.43415e-05	0.000102134	1.2388e-05	0.00012681	0.000118298	-0.00017737	7.91679e-05	3.88809e-05	0.000148709	-2.0953e-05	3.19968e-06	-8.83075e-05	-0.000161145	7.57215e-05	4.9035e-05	-1.03091e-05	0.000151268	0.000167031	-0.000165245	0.000144285	9.54135e-05	7.02056e-05	0.000131884	3.8797e-05	-8.28187e-05	-5.89377e-06	6.04271e-05	5.4588e-06	-0.000452017	-0.000917513	-0.000819213	-0.000992479	-0.000954328	-0.000799636	-0.000561926	-0.000630181	-0.000234461	0.000468036	0.000983806	0.00122
642.046	-1.46161e-05	-9.14119e-05	-3.53461e-05	-0.000148857	-1.43868e-05	2.10875e-05	0.000124252	0.000182286	-6.18841e-05	-3.0744e-05	-8.37486e-06	-6.70931e-06	1.27654e-05	0.000142205	-7.02642e-05	6.40922e-05	6.35405e-06	-1.25267e-05	6.8014e-05	3.21463e-05	9.93568e-05	-3.52872e-05	4.7467e-05	6.19255e-06	-3.48665e-06	7.01165e-05	4.29767e-05	4.62551e-05	1.67671e-05	0.000101969	9.05642e-05	0.00016962	-3.18361e-06	3.45443e-05	0.000312121	-8.40537e-05	-5.73532e-05	-0.000396078	-0.000775669	-0.000821828	-0.00109	-0.000983455	-0.000864297	-0.000705534	-0.000412443	-0.000164332	0.000476548	0.000938041	0.00118
643.233	0.000102389	9.08787e-06	4.08927e-05	3.07518e-05	6.25784e-05	-0.000112127	-5.4776e-05	7e-05	2.92378e-05	7.46854e-05	2.60808e-05	-0.000205205	-9.52129e-06	3.58537e-05	-9.99278e-05	4.04211e-05	0.000201182	5.47704e-05	0.000160258	0.000118843	1.51909e-05	1.41039e-05	-0.000122567	-9.2536e-05	8.952e-05	4.48332e-05	0.000125859	-3.08967e-05	0.000113833	0.00010286	0.000121057	0.000105256	9.2108e-05	7.81884e-05	2.82587e-05	-7.8341e-05	3.55155e-05	-0.000460458	-0.000705121	-0.000880174	-0.00104	-0.00109	-0.000996082	-0.000806946	-0.000514616	-0.000262296	0.000149716	0.000725764	0.000994538
644.419	-1.27709e-05	-4.83849e-06	-6.19767e-05	0.000129723	-7.07326e-05	4.1763e-05	4.41504e-05	-9.23914e-05	-9.18742e-05	1.60095e-05	6.12423e-05	-5.54352e-05	-6.34143e-06	-1.75293e-05	0.000121002	5.59931e-05	5.84339e-05	0.000144635	0.000121564	0.000101787	-0.000177939	0.000137753	-0.000132474	0.000140104	0.000176844	1.66385e-05	2.17505e-05	6.22438e-05	9.87133e-05	0.000127299	7.89056e-05	0.000202339	1.66956e-05	6.21532e-05	0.000150589	-2.97635e-05	-0.000240021	-0.0002602	-0.000827096	-0.000933206	-0.000997193	-0.000913173	-0.00113	-0.000819793	-0.000535428	-0.000331964	0.000206072	0.000725964	0.00108
645.605	-9.30442e-06	-5.52718e-06	6.33749e-05	1.67295e-05	-3.31953e-05	-1.95412e-05	-2.20399e-05	-4.96004e-05	-3.38663e-05	0.000171094	6.98105e-05	-1.76518e-05	-0.000185076	8.30664e-05	-2.82728e-05	7.10228e-05	0.000261407	3.30379e-06	0.000141175	4.52716e-05	-2.77052e-05	5.85811e-05	-2.882e-05	-4.62241e-05	3.45991e-05	7.08165e-05	0.000126433	0.000126636	-7.91881e-05	0.00015822	6.34744e-05	0.00017237	6.31425e-05	-0.000171473	0.000264187	8.69866e-05	-0.000127268	-0.000204376	-0.000785628	-0.000927105	-0.00103	-0.00129	-0.000999607	-0.000912865	-0.000530085	-0.000432694	0.000331288	0.000690315	0.001
646.792	-5.60793e-05	6.19928e-05	-0.000127435	1.34686e-05	-3.34113e-06	7.33847e-06	-2.39686e-05	1.55581e-07	4.14202e-05	1.34735e-05	2.99411e-05	-1.43987e-05	1.37349e-05	4.60238e-05	-2.32642e-06	0.0002321	-1.46038e-05	-8.33181e-05	0.000136829	-6.3595e-05	-0.000100279	3.54564e-06	-6.70695e-05	-0.000124057	1.82294e-05	-9.71983e-05	-0.000158469	-2.65654e-05	-0.000145856	-5.90996e-05	9.23999e-05	7.68581e-05	-1.3351e-05	-8.50283e-05	0.000116051	0.000134323	-4.44546e-05	-0.000316368	-0.000755094	-0.00111	-0.00104	-0.00122	-0.00129	-0.000971786	-0.000748549	-0.000520218	0.0001148	0.000342978	0.00109
647.979	2.82448e-05	2.2528e-05	-7.40791e-05	0.000119374	0.00010477	-0.000103157	0.000129361	-3.58304e-05	5.72215e-06	-0.000112621	-1.45725e-05	-6.82682e-05	-4.7466e-05	2.99792e-05	1.60143e-05	0.000103236	1.80403e-05	6.94953e-05	0.000100214	0.00011318	2.97586e-06	-0.000192642	-3.62578e-05	-3.0624e-05	-1.79769e-06	-3.25272e-05	-4.56706e-05	0.000108275	-0.000156894	9.11648e-05	0.000236459	0.00031361	-8.15035e-05	-4.49749e-05	0.000154127	5.9862e-05	9.15093e-05	-0.000339969	-0.000864741	-0.000993425	-0.00112	-0.00118	-0.00127	-0.000999632	-0.000760974	-0.000586223	4.59484e-05	0.000393665	0.00107
649.166	3.29147e-05	0.000145073	-4.78163e-05	-2.49554e-05	0.000164004	6.62481e-05	7.08639e-05	0.00011595	-4.45893e-05	1.49463e-05	-7.2706e-05	-0.000153478	-0.000215482	2.36422e-05	-7.46141e-05	-0.000101593	-1.73247e-05	6.43592e-05	-9.93616e-05	7.78626e-05	-8.248e-05	-4.39442e-05	-1.82046e-05	-3.1822e-05	-5.25779e-05	-0.000196044	1.34636e-05	4.06006e-05	-4.57843e-05	7.62546e-05	0.000241858	0.000240761	-0.000179192	5.59326e-05	0.00010386	2.02711e-05	-0.000162352	-0.000377023	-0.000852912	-0.000982271	-0.00107	-0.00126	-0.00117	-0.000989516	-0.000907715	-0.000541178	-5.85776e-05	0.000395697	0.000812683
650.353	-3.36504e-05	-0.000137328	3.70913e-05	8.77056e-05	7.15829e-05	6.8519e-05	0.000163726	7.90258e-05	6.78981e-05	-0.000154408	1.24478e-05	-0.000222514	-1.46978e-06	0.000105681	-0.000144307	-8.66077e-05	0.000105301	-7.26826e-05	1.0321e-05	0.000104362	0.000104453	0.000113115	-4.24983e-05	-8.27449e-05	9.79566e-06	-8.34878e-05	-4.51947e-05	-0.000123256	8.33516e-06	0.000143143	3.7075e-05	8.48564e-05	0.000165028	-1.19668e-05	-5.42592e-06	-2.96174e-05	-5.51877e-05	-0.000360845	-0.000774849	-0.000939537	-0.00123	-0.00129	-0.0012	-0.000984042	-0.000794699	-0.000592171	-0.000246032	0.000395026	0.000713422
651.54	3.66459e-05	-2.27285e-05	3.60616e-05	-2.3757e-05	4.06806e-05	-0.000140208	0.000110474	0.000144072	0.00012768	1.38525e-05	-4.95284e-05	-0.000142695	-4.82072e-05	-7.24905e-06	-7.50936e-05	-4.40277e-05	-3.60788e-05	4.07437e-05	0.000139381	0.000112035	2.70276e-05	-3.73219e-06	-4.48291e-05	-7.54199e-05	-1.21293e-05	-8.07415e-05	-6.21566e-05	-8.81144e-05	3.00718e-07	1.59035e-05	0.000220573	0.000127655	0.000156597	1.52194e-05	0.00011475	7.20967e-05	-7.15072e-06	-0.000380864	-0.000809577	-0.0009826	-0.00119	-0.00149	-0.00128	-0.0012	-0.000988197	-0.000652038	-0.000243344	0.000246895	0.000751827
652.727	-0.000134367	-8.07061e-05	7.75148e-06	3.28669e-05	-2.69066e-05	-9.46469e-05	6.06257e-05	0.000155035	2.98954e-05	-6.07738e-05	5.06285e-06	3.96185e-06	2.20023e-05	0.000152885	-7.26864e-05	8.62815e-05	0.000102457	-2.0174e-05	2.12252e-05	9.24929e-05	-0.000111952	-0.000190062	-0.000230595	3.8333e-05	3.96929e-05	-5.69067e-05	6.74604e-05	6.70146e-05	0.000192332	4.97058e-05	0.000135232	-1.69802e-05	0.000137763	-6.8277e-06	3.72715e-05	-7.29198e-05	-0.000104925	-0.000291585	-0.000785566	-0.000859469	-0.00128	-0.00129	-0.00121	-0.00119	-0.000930328	-0.000622332	-0.000222598	0.000218894	0.000643928
653.914	-9.26762e-05	-2.40949e-05	2.20116e-05	1.72482e-05	7.62199e-05	-2.3245e-05	-8.93724e-05	-5.15553e-05	9.05106e-05	9.28704e-05	-3.92987e-05	-6.54217e-05	-1.60152e-05	0.000149913	-4.70943e-05	1.29668e-06	0.000157303	-3.98976e-05	5.84294e-05	1.51651e-05	0.000105099	0.000131567	-3.29382e-05	1.10048e-05	1.84053e-05	6.68776e-05	-5.20748e-05	0.000168902	-0.000191905	0.0001051	0.000119819	6.11518e-05	4.08952e-05	0.000118894	-3.85946e-05	4.23471e-05	4.31983e-05	-0.000270312	-0.000745803	-0.000809545	-0.00124	-0.00131	-0.00129	-0.00116	-0.00109	-0.000685413	-0.000202959	2.15956e-05	0.000742011
655.102	-4.25505e-05	-8.08603e-05	-2.05157e-05	-9.11231e-05	-2.16525e-06	-4.6362e-05	-1.14215e-05	7.27821e-05	-6.12654e-05	0.000147975	-2.49669e-05	8.31094e-06	-3.94315e-06	0.000127126	2.89799e-05	2.33795e-05	1.42457e-05	2.61141e-05	-6.19209e-05	8.25427e-05	-0.000117887	-8.35727e-05	-1.90153e-05	-0.00037192	-0.000154298	-8.14566e-05	-2.96916e-05	-4.89692e-05	-0.000131443	6.80751e-05	1.1421e-05	-1.54059e-05	-0.000100074	1.12123e-05	0.000129413	-6.11189e-05	-7.04396e-05	-0.000382819	-0.00102	-0.000844033	-0.0014	-0.00147	-0.00142	-0.00139	-0.00118	-0.00112	-0.000488849	-7.86344e-05	0.000356793
656.29	1.49652e-05	-9.6999e-05	-7.30067e-05	-8.15415e-05	3.77689e-06	-2.4418e-05	-4.43903e-05	0.000105496	0.000106438	0.000122298	2.04911e-06	-5.2284e-05	-0.000158698	0.000161886	1.4428e-05	7.25773e-05	-5.97094e-05	7.63774e-05	-0.000169203	-4.06277e-05	3.95332e-05	-0.000136521	3.82831e-06	-3.78244e-05	-7.33423e-05	-9.26636e-05	-7.26258e-05	-7.46243e-06	2.49818e-05	-2.15016e-05	6.12789e-06	-5.65065e-05	2.60471e-05	-4.50158e-05	-0.000136548	8.75535e-05	-0.000166663	-0.000369407	-0.000950389	-0.00106	-0.00146	-0.00147	-0.00147	-0.00149	-0.0013	-0.00105	-0.000533821	-0.000260584	0.000282065
657.477	-0.000146563	-2.35271e-06	-0.000110184	0.000183913	-6.97747e-05	-2.10674e-05	5.91984e-05	6.84293e-05	-1.27553e-06	-2.97234e-05	0.000193857	2.11222e-05	-0.000170501	8.99559e-05	-6.50348e-05	7.77718e-05	6.21023e-05	0.000120779	6.6556e-05	7.72076e-05	-4.91779e-05	-7.30318e-05	3.79824e-05	-1.74127e-06	-0.000159351	1.83658e-05	-0.00014766	8.68299e-05	8.59664e-05	6.19439e-05	-8.65515e-05	0.000115113	0.000105267	9.46956e-05	2.66654e-05	9.77063e-06	-0.000192283	-0.000177318	-0.000859793	-0.00109	-0.00153	-0.00136	-0.00157	-0.00134	-0.0013	-0.00105	-0.000541289	-0.000226357	0.000208522
658.665	-0.000102071	1.40601e-05	-9.76014e-05	2.26873e-05	0.000104681	4.51127e-05	-7.26125e-06	0.000121039	4.37116e-05	8.63654e-05	-3.42227e-05	1.15316e-05	-0.000107566	1.73769e-05	-0.000117843	-5.04402e-05	-4.23227e-05	-7.13763e-06	9.50501e-06	-9.10948e-05	-0.000105631	-0.000114333	-2.54252e-05	4.45618e-06	2.05633e-05	1.30831e-05	-4.59876e-05	-7.35461e-05	4.10569e-05	9.14621e-05	9.79443e-05	0.000147888	9.90888e-05	0.000135676	-3.71532e-05	-4.50859e-05	6.48502e-05	-0.000266784	-0.000907952	-0.00090898	-0.00128	-0.00157	-0.00155	-0.00135	-0.00135	-0.00111	-0.000586734	-0.000127087	0.000178469
659.854	-7.72961e-05	9.04108e-05	-7.46802e-05	7.01206e-05	2.69181e-05	8.85391e-05	-8.65331e-05	7.5887e-05	-4.25822e-05	-1.44232e-05	9.84581e-05	-2.17926e-05	-0.000123068	6.01814e-05	-7.01395e-05	-6.40596e-05	0.000104743	-8.55983e-06	0.000116456	-7.3387e-05	-0.000174621	-0.000197594	-1.49883e-05	-3.40906e-05	1.36611e-05	-0.000199773	9.09542e-05	-4.19322e-05	-7.11274e-05	-2.97745e-05	-1.28838e-05	0.000139044	-5.00788e-05	7.52662e-05	9.37035e-05	-1.91009e-05	-6.61921e-05	-0.000339243	-0.0011	-0.00103	-0.00144	-0.00172	-0.00166	-0.00169	-0.00166	-0.00121	-0.000695293	-0.000349291	-3.99844e-06
661.042	-0.000164088	6.99633e-05	3.95221e-05	8.21406e-05	-6.15828e-05	0.000119764	-1.57657e-05	0.000201617	-3.35087e-05	-5.16509e-05	0.000103559	-1.50732e-05	-4.71667e-05	-5.11328e-05	-0.000176598	-2.99971e-05	0.000128795	7.59501e-05	3.08505e-05	-0.000136458	-5.72531e-07	-0.000216172	0.000161551	1.29916e-05	2.01673e-05	-3.33092e-05	6.2864e-05	6.77149e-06	-0.000158239	7.24461e-05	0.000189458	1.22187e-05	3.24032e-05	6.13893e-05	6.2842e-05	-2.74751e-05	-3.06965e-05	-0.000253606	-0.000953593	-0.00105	-0.0013	-0.00171	-0.00173	-0.00169	-0.00172	-0.00136	-0.000786748	-0.000781796	-8.47977e-05
662.23	5.68153e-05	1.0987e-05	2.38693e-05	-3.03733e-06	1.93146e-05	0.000146733	-2.5748e-05	8.81865e-06	-3.78852e-05	-3.17128e-05	0.000111783	-0.000140781	-0.000189051	1.23196e-05	3.75737e-05	0.000113172	-7.30922e-06	0.000147046	-1.14609e-05	-1.96952e-05	-1.66985e-05	-7.28286e-05	-1.44153e-05	-9.45085e-05	-0.000126376	-0.000131465	-0.000130951	-7.12129e-05	-0.000106739	2.09506e-05	5.3571e-05	-2.99326e-05	0.000245798	0.000142224	-2.27517e-05	0.00012344	-5.41237e-05	-0.00033293	-0.00103	-0.0012	-0.00135	-0.00172	-0.00173	-0.00171	-0.00175	-0.00163	-0.000904985	-0.000557304	-0.000218486
663.419	4.84537e-05	4.35915e-05	1.12181e-05	-7.30035e-05	-1.91312e-05	-0.000107816	-6.35256e-05	2.7718e-05	9.13952e-06	7.63544e-05	0.000204444	4.12491e-06	-9.60867e-05	1.22276e-05	-7.7709e-05	3.76316e-05	-0.000343412	4.34662e-05	-9.44258e-05	-2.66724e-05	-8.02345e-05	-5.3268e-07	-7.71185e-05	-0.000135019	-0.000141504	1.22899e-05	-9.97173e-05	-8.96155e-05	-2.56639e-05	2.61464e-05	3.23759e-06	-1.89829e-05	6.3341e-05	-5.66796e-05	8.6727e-05	4.45129e-05	-4.52571e-05	-0.000204306	-0.000900842	-0.00119	-0.00156	-0.00172	-0.00182	-0.0017	-0.00176	-0.0014	-0.000912086	-0.000626558	-0.000151731
664.607	2.58348e-06	0.000115195	3.14061e-05	-2.22171e-05	1.7698e-05	2.70206e-06	8.37271e-05	4.3282e-05	3.15223e-05	-0.000196291	-7.54168e-05	-3.05216e-05	-0.000115981	0.000125264	-1.29525e-05	-3.61746e-05	5.46673e-06	-8.64031e-05	-7.91983e-05	5.13121e-06	-0.000185618	-0.000139123	7.62318e-05	0.000102794	3.43943e-05	-4.8827e-05	8.01135e-05	-8.17128e-05	3.60643e-05	-0.000203005	1.28839e-05	0.000164098	0.000115652	-0.000187227	-0.000144409	0.000102267	-0.000143093	-0.000209153	-0.000907671	-0.00117	-0.0015	-0.00173	-0.00184	-0.00186	-0.00178	-0.00155	-0.00117	-0.000664642	-0.000129996
665.796	-3.90917e-05	-2.30146e-05	-8.90364e-05	-3.47199e-05	0.000156607	2.1442e-05	3.39544e-05	0.000113213	0.000135253	-0.000176749	0.000173786	-6.07837e-05	-3.03156e-05	1.17931e-05	-0.000192337	7.71086e-05	4.70454e-05	9.23396e-05	2.90553e-05	7.29332e-05	-3.13512e-05	-2.13887e-05	0.000199836	-0.000147634	-6.97531e-05	-3.60514e-05	-1.66708e-05	8.29133e-05	7.85302e-05	-4.45914e-07	7.33521e-05	2.61338e-05	-0.000112176	-6.43892e-05	-0.000156408	2.1003e-05	0.000190946	-0.000315016	-0.000950174	-0.00107	-0.00176	-0.00174	-0.00194	-0.00169	-0.00176	-0.00178	-0.00118	-0.00103	-0.000272474
666.985	-1.20581e-05	-8.16106e-06	5.08593e-05	-0.000113525	-9.77177e-05	-1.24788e-05	1.79317e-05	5.64504e-06	0.000120019	7.60994e-05	0.00010648	-7.6589e-05	-2.83327e-05	8.76232e-07	-2.90485e-05	0.000158864	0.000121916	0.000136483	0.000169724	-1.62315e-05	7.87068e-05	-7.54668e-08	6.2035e-05	-3.9321e-05	2.55355e-05	3.69947e-05	9.69972e-05	8.07428e-05	6.27934e-05	0.000141739	1.88404e-05	2.89616e-05	-1.48735e-06	6.05479e-05	6.8542e-05	-4.56242e-05	-2.04558e-05	-0.000176318	-0.000970845	-0.00121	-0.00155	-0.00173	-0.00181	-0.00192	-0.00188	-0.00187	-0.00122	-0.000880731	-0.000459147
668.174	7.65091e-05	4.31785e-05	6.64812e-05	0.000139338	0.000161418	-0.000100751	6.11527e-06	-0.000127948	-2.0738e-05	-0.000128965	5.41738e-05	-9.13099e-05	-0.000140914	-1.95147e-05	8.29272e-05	0.000132766	-3.48891e-05	0.000101077	0.000190225	8.35219e-06	1.62544e-05	-3.66528e-05	2.07613e-05	-7.21932e-05	-8.81622e-05	-4.78205e-06	1.24038e-05	-5.04196e-05	5.23377e-05	-5.05144e-06	3.13917e-05	-0.000106001	0.000286054	5.87259e-05	6.37134e-05	2.71313e-05	6.04943e-05	-0.00021885	-0.000970219	-0.00125	-0.00154	-0.00174	-0.00201	-0.00186	-0.00196	-0.00177	-0.00127	-0.0011	-0.00062067
669.363	2.11943e-05	0.000108699	-0.000141595	-1.39543e-05	7.20789e-05	7.37995e-06	7.82211e-05	5.0539e-05	3.78093e-05	2.60177e-05	9.21584e-05	-8.96333e-05	-8.68475e-05	-2.00436e-06	-0.000160063	0.000160661	-7.15567e-06	3.11249e-05	-8.45219e-05	-0.000147123	3.7082e-05	-7.47698e-05	7.76817e-05	-1.88082e-05	-0.000114247	-6.69699e-05	-9.42858e-05	0.00013531	-0.00025336	-0.000143539	0.00011455	-3.4783e-05	-3.21248e-05	3.57336e-05	-1.20833e-05	2.73631e-05	5.8848e-05	-0.00039391	-0.000876108	-0.00128	-0.00169	-0.00199	-0.00207	-0.00202	-0.00205	-0.00199	-0.00154	-0.0014	-0.000578938
670.553	2.14686e-05	-3.48796e-05	5.63521e-05	9.54536e-05	0.000102186	-8.29045e-05	-0.000122656	0.00016075	-7.76939e-05	5.41093e-05	0.000183589	-0.0001216	-0.000171903	6.62579e-05	-0.00012853	-0.000126741	-0.000150924	5.04803e-05	-0.000179505	2.06783e-06	-4.85926e-05	-9.66236e-05	-0.000216478	2.33567e-05	-2.10861e-05	-1.81366e-05	4.79428e-05	1.53839e-05	-0.000162104	-9.0581e-05	1.36111e-05	5.84454e-05	5.35283e-05	3.50053e-05	-9.17819e-06	4.54157e-05	-0.000111469	-0.000345329	-0.000984819	-0.00129	-0.00176	-0.00198	-0.00204	-0.00224	-0.00217	-0.00223	-0.00143	-0.00136	-0.000844917
671.742	-4.68839e-06	7.23054e-05	-0.000172291	0.000174754	-4.19044e-05	-5.40552e-05	-0.00012246	-0.000125747	6.70275e-05	-6.07165e-05	0.00015544	3.22818e-05	-5.13101e-05	0.000204784	-7.34194e-05	9.70312e-05	-5.63837e-05	0.00012821	3.00762e-05	-7.12467e-05	7.49064e-06	-0.000123245	-0.00013071	3.7032e-05	-6.1549e-05	-0.00017821	0.000151007	1.13675e-05	-5.05075e-05	2.68568e-05	3.88216e-05	0.00011481	7.34639e-05	-2.81846e-05	-5.46869e-05	7.36846e-05	-2.82034e-05	-0.000280874	-0.000887263	-0.00139	-0.00175	-0.00184	-0.00216	-0.00227	-0.00223	-0.00224	-0.00162	-0.00147	-0.000990387
672.932	4.85169e-05	-7.83957e-05	-8.08329e-05	-7.09865e-05	5.47516e-05	0.000107995	-4.60821e-05	-1.4741e-05	0.000123212	-8.01959e-05	-1.0108e-05	2.62979e-06	3.36791e-05	0.000164883	-0.000154326	6.3238e-05	9.04784e-06	-2.30433e-05	-8.13807e-05	2.6919e-05	4.28265e-05	-0.000142486	-1.45398e-05	-2.31305e-05	-3.98022e-05	-2.45143e-05	8.36603e-05	4.70538e-05	1.46038e-05	1.52534e-05	-1.83689e-05	0.000156822	1.07554e-05	9.46464e-05	3.53455e-05	-0.00010454	-4.12511e-05	-0.000163697	-0.00098113	-0.00132	-0.00172	-0.00208	-0.00218	-0.00238	-0.00231	-0.00224	-0.00174	-0.00147	-0.000863607
674.121	-7.28771e-06	-6.17906e-05	-7.12411e-05	7.56984e-05	-5.4579e-06	-5.41044e-06	-7.72543e-05	-1.5598e-06	7.72419e-05	9.26406e-05	2.7067e-05	-6.40848e-05	4.04335e-05	6.7748e-05	-8.67427e-05	0.000128841	-2.55613e-05	5.04398e-06	2.96099e-05	3.73943e-05	0.000121028	3.82232e-05	-5.3076e-06	0.000136737	6.81474e-05	4.7354e-05	0.000139709	-7.91536e-05	-7.22058e-05	4.06587e-05	0.000103533	3.71934e-05	6.32658e-05	0.000118971	0.000110646	0.000106892	8.06133e-05	-0.000179879	-0.000958211	-0.00136	-0.0018	-0.002	-0.00226	-0.00222	-0.00248	-0.00237	-0.00175	-0.00165	-0.000950932
675.311	-2.66827e-05	1.19421e-05	-5.1973e-05	-3.85884e-05	0.000171035	9.93742e-06	1.406e-05	-2.17181e-05	7.16778e-05	2.40097e-05	-5.79503e-06	-3.36017e-05	-0.000124805	8.36789e-05	-8.3177e-05	-1.00984e-05	8.63124e-05	5.98571e-05	-8.07862e-05	-2.79337e-06	-2.22605e-05	5.97338e-05	1.45488e-05	-6.85795e-05	-0.000132485	-0.000140678	-4.51581e-06	-5.37904e-07	4.94221e-05	0.000151752	2.42966e-05	4.63354e-05	0.000133895	8.46752e-05	-1.93204e-06	-4.04048e-05	-3.19343e-05	-0.000273139	-0.00101	-0.00144	-0.00202	-0.00208	-0.0023	-0.00248	-0.00242	-0.00244	-0.00187	-0.0018	-0.00118
676.501	-6.83232e-05	8.32136e-05	0.000102798	7.16996e-05	1.90464e-07	-5.55464e-05	4.30853e-05	-2.71914e-05	-4.36065e-05	-8.37043e-05	-1.731e-05	-2.08085e-05	7.25452e-05	2.05876e-05	-7.76296e-05	3.76094e-05	6.36531e-05	0.000107567	0.000211969	0.000101266	6.23586e-05	8.53407e-06	-4.17647e-05	6.31348e-05	-4.85805e-05	-2.35973e-05	-9.21365e-06	-1.1673e-05	2.65561e-05	-9.9643e-06	2.05924e-05	7.3639e-05	7.07066e-05	5.16664e-06	-4.35798e-05	5.40938e-05	-5.89807e-05	-0.000224895	-0.000915808	-0.00148	-0.00198	-0.00223	-0.00244	-0.00246	-0.00264	-0.00255	-0.00201	-0.00193	-0.00126
677.691	-0.000176126	0.000116814	2.66814e-05	7.00195e-05	4.5792e-05	6.73535e-05	4.39856e-05	1.24158e-05	-0.000140637	-4.38759e-05	3.04953e-05	7.11308e-05	-1.00249e-05	-5.23857e-05	-6.16391e-05	0.000119859	0.000193633	7.73281e-05	0.000171425	3.78433e-05	-3.35367e-05	-0.000118284	-0.000144709	-9.90115e-05	-0.000162545	-0.000236963	0.000154595	6.1618e-05	5.77586e-05	-9.69422e-05	3.29353e-05	3.06522e-05	2.27876e-05	-4.10663e-05	-2.85726e-05	5.9285e-05	-0.00012951	-0.00013686	-0.000973509	-0.00159	-0.00202	-0.00239	-0.0025	-0.00257	-0.0029	-0.00283	-0.00203	-0.00195	-0.00138
678.882	-0.000160837	9.88189e-06	1.03821e-05	9.47283e-05	-1.44009e-05	-2.9143e-06	0.000159542	9.94527e-05	0.000111039	4.53764e-05	-2.09771e-05	-2.11228e-05	-0.000175259	3.82434e-05	-0.000173135	9.01489e-05	0.00018206	3.13166e-05	3.50073e-05	9.86419e-06	-0.000192617	-1.96932e-05	4.15439e-05	-5.45522e-05	-0.000133814	-1.52481e-05	-4.09899e-05	0.000122128	6.21619e-05	9.93576e-05	0.000154924	-8.89053e-05	2.70993e-05	8.44508e-06	3.9619e-05	4.91583e-05	-4.01266e-05	-0.000310713	-0.000850445	-0.00134	-0.00195	-0.00224	-0.00259	-0.00268	-0.00275	-0.00273	-0.00217	-0.00207	-0.00143
680.072	-0.000125809	1.55687e-05	8.55953e-05	9.11052e-05	8.99119e-05	-1.7802e-05	-7.79228e-05	8.07148e-05	1.57952e-05	2.91091e-05	7.87819e-05	-7.21061e-05	-0.000203123	1.94033e-05	-9.22168e-06	3.47083e-05	2.51408e-05	0.000202604	7.53987e-05	0.000108153	-2.36815e-05	-0.000160136	-7.88321e-05	5.27962e-05	-0.000100191	-2.69628e-05	8.26668e-05	-6.46901e-05	-0.000106786	2.01165e-05	6.22516e-05	-7.12855e-05	-6.7028e-05	2.91464e-05	1.31452e-05	6.17762e-05	3.64964e-05	-0.000145064	-0.000982667	-0.00161	-0.00209	-0.00228	-0.00262	-0.00277	-0.00274	-0.00294	-0.00223	-0.00235	-0.00173
681.262	-6.19089e-05	-1.58869e-05	-4.68187e-05	0.000125079	6.64099e-05	-0.000144174	-9.522e-06	6.70171e-05	-3.82672e-06	2.11091e-05	2.36858e-05	2.77416e-05	-0.000176779	7.96432e-05	4.82303e-05	3.61004e-05	3.09252e-06	0.00022092	-2.71679e-06	9.18299e-05	-2.5475e-05	-7.03068e-05	-7.56493e-05	-4.74972e-05	-0.000140793	5.49014e-05	7.081e-05	8.55908e-05	-8.67243e-05	3.13942e-05	2.11541e-05	8.85124e-06	-8.89879e-05	9.31932e-05	5.90624e-06	-7.55531e-05	2.57644e-05	-0.000119963	-0.000862204	-0.00149	-0.002	-0.00229	-0.00272	-0.00271	-0.0029	-0.00299	-0.00234	-0.00241	-0.00176
682.453	-0.000132422	0.000100942	0.000104171	1.36733e-05	3.26586e-07	-8.98744e-05	-1.78469e-05	7.00699e-05	2.13443e-05	-3.95295e-05	-2.83411e-05	5.07967e-06	-0.000168227	0.000119451	4.11846e-05	0.000105364	-4.63487e-05	7.96201e-05	0.000138124	5.64145e-05	2.38418e-05	-0.000101286	8.73773e-05	1.78846e-05	-0.000121795	4.20714e-05	-1.69111e-06	9.89053e-05	-4.3908e-06	-5.33591e-05	9.75319e-05	-1.42297e-06	0.000118134	5.23809e-05	-7.03904e-05	-3.72224e-05	-0.000120676	-0.000198969	-0.00103	-0.00172	-0.00205	-0.00233	-0.00274	-0.00283	-0.003	-0.00309	-0.00254	-0.00249	-0.00188
683.644	-0.000100371	-3.83575e-05	4.98332e-05	5.74403e-05	8.32861e-05	8.93052e-05	-6.40332e-06	-3.00785e-05	6.72629e-05	-3.15085e-05	4.08292e-05	-3.3168e-05	-0.000228105	8.09027e-05	-8.67071e-07	-5.1503e-05	-6.65031e-06	7.48933e-05	1.12264e-05	-2.3143e-05	7.44078e-06	-3.34512e-05	2.17468e-05	2.3097e-05	-4.91099e-05	-5.9154e-05	4.41004e-05	3.04043e-05	6.51159e-05	-3.20857e-05	0.000135191	4.82972e-06	-1.87032e-05	-0.000122173	-0.000102186	1.40381e-05	-4.16086e-05	-0.000372785	-0.00108	-0.00167	-0.00217	-0.00248	-0.00269	-0.00285	-0.00307	-0.00319	-0.00269	-0.00248	-0.00193
684.835	-0.000127332	5.03781e-05	-2.86502e-05	0.000111218	-1.20686e-05	-2.66264e-05	-4.75996e-06	-2.17222e-05	4.21818e-05	9.74258e-05	-7.89791e-05	-4.4227e-05	-1.66094e-05	0.000122725	-6.29538e-05	-7.54451e-07	2.10879e-05	6.59842e-05	6.75438e-05	4.7662e-05	-4.34065e-05	-7.94919e-05	1.49604e-06	-1.6089e-05	-0.000117827	-0.000138525	-2.38624e-05	-0.000130687	2.38384e-05	-1.76074e-05	-1.90219e-07	-1.4641e-06	2.94005e-05	-2.88886e-05	-2.29263e-05	0.000142923	-0.00010994	-0.000309144	-0.000976174	-0.00168	-0.00227	-0.00265	-0.00296	-0.00308	-0.00314	-0.00319	-0.00271	-0.00273	-0.0022
686.026	-8.07347e-05	1.61106e-05	-9.86872e-05	5.49761e-05	-2.48349e-05	3.30832e-05	-2.90718e-05	0.00011123	4.20443e-05	4.30057e-05	-3.85191e-05	-8.44309e-05	-2.18214e-05	0.000125719	-4.80693e-05	3.31138e-05	3.19853e-05	7.92883e-05	4.69102e-05	-1.85552e-05	1.3279e-05	-7.91687e-05	-0.000126826	1.55886e-05	4.69339e-05	-7.51947e-06	9.87618e-05	-0.000149511	0.00019036	5.05823e-05	3.94205e-05	-8.67739e-05	1.61788e-05	-4.7026e-06	9.96926e-05	0.000112047	-5.96945e-05	-0.000249022	-0.00101	-0.00162	-0.00228	-0.00256	-0.00287	-0.00321	-0.00329	-0.00333	-0.00291	-0.00277	-0.00231
687.217	-7.62181e-05	2.98989e-05	1.50923e-05	-3.76895e-05	3.9187e-05	-3.9977e-05	3.47169e-05	0.000131275	2.65111e-05	7.19995e-05	1.4748e-05	-5.24915e-05	-0.000148481	9.40307e-05	-0.000102602	0.000139831	0.000196582	5.48258e-05	0.00011993	6.19834e-05	-3.90111e-05	-4.91217e-05	9.90057e-06	-4.70658e-05	2.60614e-06	6.96642e-05	5.83664e-05	0.000181826	-7.05704e-05	-1.76268e-05	0.000101967	6.91667e-05	5.70388e-05	5.00939e-05	7.13963e-05	2.11215e-05	-4.80594e-05	-5.54749e-06	-0.000823194	-0.00165	-0.00224	-0.00258	-0.00294	-0.00317	-0.00309	-0.00324	-0.00286	-0.00284	-0.0024
688.409	-9.25812e-05	5.59707e-05	-4.61631e-05	-1.77143e-05	5.13594e-05	-5.14559e-05	9.7235e-05	8.36844e-05	6.39835e-05	-7.20074e-06	6.00812e-05	-8.20022e-06	-0.000141734	2.51609e-05	-7.24254e-05	8.92523e-05	6.00977e-05	0.00011602	9.5263e-05	0.000114442	-4.18364e-05	6.08632e-05	-8.23438e-05	-1.6269e-05	-6.29035e-05	2.07188e-05	-5.9156e-05	4.85698e-05	0.000116853	1.32993e-06	-5.35069e-05	0.000156936	-7.26067e-06	-2.64136e-05	-3.54388e-05	7.17554e-05	2.71806e-05	-0.00012547	-0.000965683	-0.00168	-0.00234	-0.00266	-0.00305	-0.00319	-0.00331	-0.00353	-0.00307	-0.00306	-0.0024
689.6	-8.8699e-05	9.21651e-05	5.99098e-05	-2.29631e-05	8.3941e-05	1.55659e-05	6.44002e-05	-4.10723e-05	-0.000108345	9.21839e-06	-2.71545e-05	-5.34326e-05	-1.61271e-05	5.66627e-05	-2.40693e-05	9.34362e-05	7.64663e-05	8.84871e-05	3.65605e-05	7.77153e-05	1.8291e-05	4.3224e-05	-1.85595e-05	-2.3866e-05	-3.10801e-05	-2.17131e-05	4.14621e-05	9.28765e-05	3.92151e-05	3.58514e-05	9.50399e-05	0.000129259	0.000164963	-5.94407e-05	9.91411e-05	-2.7797e-05	0.000135622	-0.000166623	-0.001	-0.0016	-0.0023	-0.00263	-0.00308	-0.00329	-0.00343	-0.00363	-0.00319	-0.00314	-0.00246
690.792	-9.7003e-05	6.8031e-05	-6.06118e-06	-5.64531e-05	0.00015267	5.65851e-05	3.11468e-05	-3.10324e-05	-2.76987e-05	-1.34541e-05	-0.000141432	5.81416e-06	4.64082e-05	0.000115812	-0.000103333	6.85098e-05	0.00012031	0.00012389	-6.85382e-05	0.000123446	7.22805e-05	7.80216e-05	-6.68629e-05	3.78914e-05	-4.53546e-05	-1.8352e-05	1.80319e-06	4.55243e-05	2.63288e-05	7.82161e-05	-1.23256e-05	-0.000121901	8.1995e-05	-0.000101505	-9.10371e-06	0.000161504	-9.85619e-06	-0.000212682	-0.00105	-0.00178	-0.0025	-0.0028	-0.00313	-0.00322	-0.00349	-0.00372	-0.00327	-0.00326	-0.00277
691.984	7.935e-07	3.97816e-05	-6.42835e-05	7.92535e-05	0.000103955	-6.56423e-06	0.000108276	-7.15767e-05	-1.85926e-05	-2.32507e-05	4.66155e-05	-0.000124577	-8.37682e-05	0.000117233	-0.000103295	4.42661e-05	3.00451e-05	0.000153429	9.15665e-05	9.9818e-05	2.92833e-06	-7.0254e-05	4.91435e-05	4.42459e-05	-0.000203542	6.30034e-06	3.18889e-05	2.42273e-05	0.000103356	5.39818e-05	1.92757e-05	-2.40946e-05	-4.17036e-05	5.83277e-05	4.73843e-05	9.09481e-05	0.000100789	-0.000169878	-0.000925665	-0.00161	-0.00235	-0.0027	-0.0031	-0.00323	-0.00357	-0.00378	-0.00331	-0.0035	-0.00299
693.175	-7.50531e-05	-6.94032e-06	-6.26986e-05	-1.07172e-05	0.00010417	-9.76395e-06	8.25797e-05	3.59485e-05	-5.57271e-05	0.000107966	1.55514e-05	-9.13069e-05	-2.75417e-05	0.000103645	-0.000110112	-1.06098e-05	6.11959e-05	3.70536e-05	0.000130983	-2.14218e-05	1.64448e-05	7.87544e-05	-7.3916e-05	7.34101e-05	-0.000145748	-6.97922e-05	0.000128086	-0.000111807	2.82899e-05	0.000180091	8.0862e-05	0.000161125	-0.000111616	-9.232e-05	1.19935e-05	8.53013e-05	7.03121e-05	-4.89965e-05	-0.00097318	-0.00175	-0.00243	-0.00288	-0.00323	-0.00341	-0.00353	-0.00395	-0.00339	-0.0035	-0.00311
694.367	-3.25412e-05	-1.58414e-05	-3.26171e-05	-6.82463e-06	7.79009e-05	-7.10167e-07	6.03379e-05	4.65311e-05	3.68575e-05	-2.25202e-05	-1.08117e-05	-8.2837e-05	1.44733e-05	3.69953e-05	-6.83926e-05	-1.19392e-05	0.000109893	4.50131e-05	3.39782e-05	-6.56807e-05	-0.000134476	-0.000138469	-0.000104901	7.06395e-06	-1.88773e-05	0.000113985	-1.82227e-05	6.09442e-05	7.2063e-06	-3.28991e-05	0.000205139	0.000122077	9.82439e-05	-7.9084e-05	5.16554e-05	0.000114905	-3.88531e-06	-7.8387e-05	-0.000894578	-0.00181	-0.00255	-0.00286	-0.00321	-0.00346	-0.00362	-0.00406	-0.00344	-0.00367	-0.00315
695.56	-6.81522e-05	-3.90817e-05	-0.000172285	9.64477e-05	6.08706e-05	-4.27029e-05	3.6352e-05	-2.01786e-06	1.85034e-05	5.59846e-05	4.32278e-05	2.26086e-06	-3.1676e-05	3.81133e-05	4.15586e-06	1.77127e-05	5.22573e-05	8.37284e-07	2.73955e-05	-8.2814e-05	-3.89879e-05	-4.5735e-05	6.6919e-06	7.57882e-06	-1.76163e-05	-6.50814e-05	-4.4116e-05	-2.53212e-05	-6.00463e-05	0.000124183	4.1046e-05	-5.98143e-05	3.16538e-05	-4.87721e-06	8.61813e-05	0.000135063	1.00334e-05	-7.70972e-05	-0.000951115	-0.0018	-0.00247	-0.0028	-0.00328	-0.00365	-0.00369	-0.00409	-0.00362	-0.00373	-0.00327
696.752	-5.24875e-05	7.39517e-05	-1.80595e-05	1.56484e-05	-9.95904e-06	1.95744e-05	9.4934e-07	4.7226e-05	-1.09384e-05	-3.92216e-05	5.28508e-05	8.21304e-06	-6.19008e-05	7.98015e-05	-0.000105648	8.57063e-05	7.13342e-05	0.00018307	0.000111907	2.34245e-05	-1.54697e-06	-9.47415e-06	-6.67357e-05	-2.64737e-05	-9.26136e-05	-3.80839e-05	0.000126433	-1.12857e-05	-1.44033e-05	0.000241095	0.000200131	0.000186033	6.37508e-05	1.26461e-05	9.93971e-05	0.000166088	6.6951e-05	-8.8562e-05	-0.00090211	-0.00174	-0.00242	-0.0028	-0.00326	-0.0035	-0.00367	-0.0041	-0.00369	-0.00374	-0.0033
697.944	-0.000120897	0.000107909	-3.79302e-05	-4.21364e-05	-4.02973e-05	3.99373e-05	2.89398e-05	7.01353e-05	4.82896e-05	-3.93665e-05	0.000168961	2.53002e-05	-9.14266e-05	1.59301e-05	-0.000133348	-2.52909e-06	0.00011333	4.06156e-05	0.000138561	-1.68827e-05	7.09108e-05	-1.23722e-05	-1.19048e-05	-2.64559e-05	-1.35835e-05	-5.75353e-05	-1.9826e-06	9.82772e-06	-7.00791e-05	0.000207959	0.000127872	0.000133835	0.000106267	-0.000153152	8.8903e-05	9.322e-06	6.34795e-05	-3.97791e-05	-0.00081671	-0.00175	-0.00251	-0.00281	-0.00334	-0.00361	-0.00381	-0.00421	-0.00388	-0.00404	-0.00347
699.137	-2.96593e-05	-8.09874e-05	5.73482e-05	2.36147e-05	-5.78193e-06	5.74114e-05	2.92264e-05	1.29253e-05	3.14916e-05	-5.64109e-05	2.10312e-05	-1.14603e-05	-5.41776e-05	0.000101557	-9.61278e-05	2.98259e-05	-6.40284e-05	6.11057e-05	6.80267e-05	1.73489e-05	8.61741e-05	4.66574e-06	2.61472e-05	-7.37419e-05	-3.6425e-06	-4.13975e-06	-4.98481e-06	-4.05217e-05	9.10922e-07	4.7482e-05	6.64603e-05	-6.45367e-05	5.88821e-05	-6.47427e-05	-9.44964e-06	3.51137e-05	-3.84975e-05	-5.11005e-05	-0.000918265	-0.00172	-0.00242	-0.003	-0.00336	-0.0037	-0.00394	-0.00432	-0.00391	-0.00422	-0.00382
700.33	-0.000129043	-2.27221e-05	1.01686e-05	3.70266e-05	7.61493e-05	-3.66182e-05	-4.16927e-05	-6.60444e-06	1.61753e-05	-2.64122e-05	7.41784e-05	4.52759e-05	-8.67033e-06	9.11061e-05	-7.83168e-05	0.000104354	3.96689e-06	8.77588e-05	5.7869e-05	2.35705e-05	-2.55904e-05	6.36998e-05	-1.16094e-05	2.38086e-05	-8.09272e-06	-2.09445e-05	8.02213e-07	6.30999e-06	-8.54308e-05	0.000102248	7.84474e-05	-3.31021e-06	9.09474e-05	-3.34036e-05	-2.54933e-05	4.80062e-05	-3.38757e-05	-9.29397e-05	-0.000967182	-0.0019	-0.0025	-0.00293	-0.00344	-0.00376	-0.00401	-0.0045	-0.00419	-0.00442	-0.00401
701.523	-0.000119713	-3.86244e-05	-7.4615e-05	3.20649e-05	0.000146307	7.33155e-05	-3.23588e-05	0.000133705	-3.12087e-05	-6.39884e-05	-2.35808e-05	-5.33281e-05	-9.22536e-06	9.89116e-05	-3.76617e-05	4.3371e-05	-3.39951e-06	7.08048e-05	-7.95847e-06	-1.95291e-05	0.000100835	-3.68174e-06	-1.81605e-05	-4.75459e-05	1.47506e-05	-2.94732e-05	-2.46565e-05	7.21792e-05	-3.47652e-05	0.000104766	-3.05356e-05	1.26317e-05	3.75444e-05	6.46138e-05	4.98943e-05	-1.59922e-05	-0.000122511	-0.000164629	-0.000865818	-0.00197	-0.00252	-0.00302	-0.00356	-0.00375	-0.00412	-0.00455	-0.00426	-0.00449	-0.00407
702.716	-7.0892e-05	4.18787e-05	6.26272e-07	6.16416e-06	-8.67383e-06	2.37321e-06	-3.75111e-05	4.8993e-05	-6.95026e-05	6.82751e-05	6.22636e-05	-5.79163e-05	-7.90923e-05	0.000148616	-5.56019e-05	-2.10989e-05	-8.45093e-05	0.000197017	8.8182e-05	-2.79812e-06	-4.80239e-05	8.62272e-06	-3.84412e-05	5.2898e-06	-6.07028e-05	-0.000205203	8.71298e-05	-4.64413e-06	3.18551e-05	6.75761e-05	9.62446e-05	5.7204e-05	0.000123932	-4.01876e-05	3.06027e-05	2.46419e-05	-1.69611e-05	-0.000158492	-0.000847803	-0.00195	-0.00261	-0.00306	-0.00362	-0.00399	-0.00433	-0.00481	-0.00451	-0.00467	-0.00432
703.909	-5.0585e-05	3.89733e-06	-2.00636e-05	2.01383e-05	-7.76434e-05	3.47183e-05	6.09065e-06	9.51302e-05	3.67192e-05	-1.64036e-06	9.35154e-05	-4.29649e-05	-3.34881e-05	2.61766e-05	-9.00005e-05	4.6828e-05	-3.49422e-05	0.000154766	9.08057e-05	-0.000101838	7.08781e-05	-6.19605e-05	-5.34058e-05	6.53149e-05	2.2597e-05	-0.000117234	0.00011633	-7.75851e-05	-8.61133e-05	2.12108e-05	7.2699e-05	5.4541e-05	0.00012223	-4.03021e-05	1.67844e-05	2.36058e-06	-2.80445e-05	-3.81503e-05	-0.000884075	-0.00193	-0.00265	-0.0032	-0.00374	-0.00407	-0.00426	-0.00476	-0.00468	-0.00492	-0.00442
705.102	3.83405e-05	-6.64845e-05	-3.03409e-05	1.61536e-07	5.61685e-05	3.46915e-05	8.57161e-05	-2.82792e-05	1.00015e-05	-6.1958e-05	0.000159185	-8.8155e-05	-5.23108e-05	4.54959e-05	-0.000102232	1.32798e-05	0.000114178	0.000161413	2.65217e-05	1.94432e-05	2.78019e-05	-7.54043e-05	2.31371e-05	3.24418e-05	7.25417e-05	-6.45359e-05	-4.01218e-05	7.50738e-06	3.53055e-05	9.16307e-05	5.16714e-05	0.000121015	0.000103662	-8.95516e-05	4.90503e-06	4.07824e-05	-6.51115e-05	-6.7081e-05	-0.000838399	-0.00203	-0.00276	-0.00319	-0.00379	-0.00424	-0.00446	-0.00505	-0.00476	-0.00508	-0.00463
706.295	8.15116e-06	-3.20474e-05	1.1655e-05	2.34511e-05	8.10709e-05	1.67069e-05	-3.46288e-05	3.82034e-05	-1.18911e-05	-6.29548e-05	6.92262e-05	-3.85648e-05	-9.55853e-05	0.000114995	-8.77873e-05	4.12465e-05	1.83848e-05	-4.27717e-06	1.69377e-05	-2.99583e-05	-6.09234e-05	-5.40835e-05	-0.000148351	-1.50975e-05	-8.44185e-05	4.28575e-06	2.77531e-05	-1.90734e-05	-4.6331e-05	-9.64172e-06	8.22359e-05	1.46648e-05	-2.28278e-06	-0.000125653	-3.34024e-05	-7.57939e-05	-3.35745e-05	-0.000116753	-0.000868696	-0.0021	-0.00282	-0.00323	-0.00396	-0.00431	-0.00471	-0.00525	-0.00494	-0.00533	-0.00493
707.489	-1.27996e-05	5.95774e-05	-3.11676e-05	-1.89471e-05	0.000152433	1.61585e-05	1.71181e-05	-3.89325e-05	-6.14651e-05	1.07111e-05	3.53654e-05	-2.50285e-05	-0.000106918	6.5739e-05	-6.18449e-05	4.06756e-05	8.38154e-06	4.69031e-05	3.02229e-05	3.7992e-05	-0.000101193	-7.30092e-05	-7.66391e-05	-4.5587e-05	1.91857e-05	-4.18678e-05	-0.000115401	3.1891e-05	-5.48929e-05	8.06625e-05	5.95635e-05	8.84253e-05	0.000109736	3.98e-06	-4.17214e-05	7.18719e-06	-9.27233e-05	-8.08226e-05	-0.000940781	-0.0023	-0.0029	-0.0035	-0.00409	-0.00456	-0.00477	-0.00547	-0.00514	-0.00563	-0.00523
708.683	-3.58385e-05	2.32593e-05	3.23159e-05	9.83844e-05	9.68101e-05	-5.22034e-05	-5.32206e-05	-9.88212e-06	4.37598e-05	4.44793e-05	1.63074e-05	1.03687e-05	-0.000108513	5.53487e-06	-0.000111562	-7.82696e-05	5.64638e-05	8.03997e-05	6.7122e-05	-6.60589e-05	-8.74575e-05	-6.78579e-05	-4.30259e-05	-2.29652e-05	5.91036e-05	-8.21855e-05	-3.78354e-06	6.88865e-05	-0.000113804	8.49224e-05	0.000104035	8.79047e-05	7.11988e-05	-6.63699e-05	-5.12907e-05	4.00018e-05	-2.60298e-05	-6.26944e-05	-0.000864456	-0.00225	-0.00296	-0.00351	-0.00419	-0.00454	-0.00492	-0.00556	-0.00529	-0.00579	-0.00551
709.876	-2.46313e-05	-4.79856e-05	-2.57881e-05	1.73872e-05	7.10522e-05	7.07414e-05	-4.93613e-05	-3.66335e-05	3.73404e-05	6.38572e-05	-1.55135e-05	9.68166e-06	-8.94697e-05	6.79558e-05	-4.86327e-05	3.77287e-05	0.00010978	0.000153032	9.7263e-05	1.46429e-05	8.33665e-05	6.36152e-05	-2.84149e-06	2.63214e-05	2.59967e-05	-2.24494e-05	0.000110133	-2.00317e-05	1.36808e-05	0.000134699	1.21208e-05	0.000119515	7.88855e-05	4.6109e-05	8.04162e-05	4.64734e-05	2.54748e-05	1.25594e-05	-0.000853441	-0.00232	-0.00311	-0.00358	-0.00425	-0.00464	-0.00514	-0.00578	-0.00549	-0.006	-0.00559
711.07	-4.09125e-05	2.26246e-05	-2.37888e-05	7.38832e-05	7.51324e-06	-9.65504e-05	5.29483e-05	-2.91012e-06	-1.86274e-05	-1.53563e-05	0.000105343	4.65872e-06	-9.32074e-05	8.68087e-05	-6.24267e-05	-1.19398e-05	1.5361e-06	7.43246e-05	4.27114e-05	-2.87944e-05	-6.11712e-05	-1.25142e-05	-4.86223e-06	6.56811e-05	-1.09339e-05	-3.01149e-05	-7.91588e-07	1.77273e-05	3.47809e-06	4.00178e-05	3.22246e-05	-3.93845e-06	5.87182e-05	-3.16135e-05	-2.34985e-06	-5.14119e-05	-0.000112608	-8.56e-05	-0.000944457	-0.00239	-0.00325	-0.00386	-0.00455	-0.00495	-0.0053	-0.00598	-0.00582	-0.00636	-0.00595
712.264	-3.1289e-05	-1.78078e-05	-8.26508e-05	0.000120265	-2.98616e-05	-6.77946e-05	1.37537e-05	4.0834e-05	-6.90737e-05	7.23066e-05	1.7384e-05	-5.49445e-05	1.84264e-06	7.26889e-05	1.43473e-05	7.065e-05	5.35135e-05	0.000161662	2.79491e-05	2.41619e-05	-3.80587e-06	1.50317e-05	-6.64607e-06	-2.6082e-05	-9.56192e-05	1.41232e-05	6.38987e-06	-2.23904e-05	-9.38647e-06	5.03118e-05	6.35862e-05	0.000130841	-9.77312e-05	-2.5779e-05	-2.49992e-05	-7.52289e-05	4.48823e-05	-8.59574e-05	-0.000992323	-0.00266	-0.00337	-0.00404	-0.00472	-0.00507	-0.00551	-0.00629	-0.00601	-0.00669	-0.00634
713.459	-5.68267e-05	6.96778e-05	-2.60833e-05	-2.70054e-05	1.57411e-05	1.44163e-05	-3.13819e-05	3.34938e-05	-3.80214e-05	1.00857e-05	6.81734e-05	-3.67878e-05	-3.59892e-05	2.90538e-05	1.14538e-05	-3.08067e-05	6.49421e-05	4.63081e-05	5.29014e-06	5.06521e-05	-4.64711e-05	-5.71481e-05	2.20897e-05	-2.22278e-05	-5.06442e-05	4.68485e-05	-2.39983e-05	-3.41672e-05	1.67941e-05	-1.57604e-05	4.53985e-05	1.97207e-05	-1.2457e-05	4.14368e-05	-7.30729e-06	-2.16447e-05	7.55222e-05	-4.45896e-05	-0.000819171	-0.00261	-0.00357	-0.00421	-0.00489	-0.00536	-0.00585	-0.00652	-0.00629	-0.00701	-0.0066
714.653	-9.13133e-05	5.56e-05	2.73325e-06	7.1547e-05	8.50884e-05	-9.14204e-06	-5.43616e-05	-9.06727e-06	-7.50147e-05	-1.8639e-05	1.97971e-05	-5.52811e-05	-3.82537e-05	0.00010182	1.44864e-05	-5.40703e-05	8.77914e-05	5.80526e-05	3.78618e-05	-2.90475e-05	-2.64138e-05	3.93571e-06	-0.000102345	5.36047e-05	-0.000119104	-2.09344e-05	1.56721e-05	-0.000115553	4.49485e-06	6.35823e-05	4.33288e-05	0.000135332	5.94473e-05	-4.59353e-05	5.04661e-05	1.01942e-05	9.18748e-06	-0.000165774	-0.000984812	-0.00281	-0.00383	-0.00442	-0.00508	-0.00561	-0.0061	-0.00695	-0.00672	-0.00738	-0.00695
715.847	1.58225e-05	5.53271e-05	1.1858e-05	-1.81192e-05	1.06258e-05	1.35677e-05	5.09794e-05	-3.33224e-05	-2.87103e-05	-2.36238e-05	3.19173e-05	-2.8895e-05	-8.1801e-05	7.36803e-05	-4.93062e-05	-4.276e-06	6.59423e-05	8.83155e-05	9.31649e-05	3.91689e-06	-1.01473e-05	-4.44727e-05	-7.31805e-06	3.24765e-05	-2.59603e-05	3.37104e-05	4.84912e-05	-3.42384e-05	-1.09313e-05	5.71081e-05	5.66413e-05	7.44195e-05	0.000136295	1.26063e-05	-1.531e-05	-3.92414e-05	-5.53485e-05	-6.28571e-05	-0.001	-0.00305	-0.00391	-0.0046	-0.00544	-0.00588	-0.00651	-0.00716	-0.00697	-0.00778	-0.00731
717.042	-3.08411e-06	5.27447e-05	0.00010666	4.9611e-05	0.000103461	1.78249e-05	-2.17835e-05	-2.04868e-05	-6.24449e-05	-0.000119386	6.72991e-05	-4.97086e-05	-7.43234e-05	-9.57766e-06	-3.68055e-05	3.75903e-05	-4.39513e-07	9.34382e-05	8.50583e-05	5.06618e-05	-3.06681e-05	-8.64981e-05	3.63712e-05	1.67254e-05	-6.58878e-06	1.28984e-05	3.49725e-05	9.96029e-05	-7.54941e-06	7.20918e-06	0.000129617	7.92859e-05	8.79285e-05	-6.24989e-06	3.65767e-05	-1.21176e-05	-5.0677e-05	-6.28845e-05	-0.00101	-0.00315	-0.00428	-0.0048	-0.0057	-0.0062	-0.00683	-0.00759	-0.00728	-0.0082	-0.00774
718.237	2.44076e-06	2.96464e-05	2.22857e-05	2.94446e-05	-1.38836e-05	0.00011914	-9.05185e-05	-7.82784e-06	5.15807e-06	7.30649e-07	-1.41034e-05	-1.12625e-05	-9.21198e-05	8.28341e-05	-6.19647e-05	1.84018e-05	-7.10814e-06	0.000107296	2.05315e-05	3.41908e-05	4.38758e-05	-0.00014169	-7.49477e-05	-3.18442e-05	7.60337e-05	-2.66115e-05	-4.73033e-06	2.94818e-05	-5.45112e-05	-5.13853e-05	-3.79789e-05	1.83172e-06	1.53841e-05	1.69396e-05	-0.000134659	-6.13808e-05	-3.33284e-05	-6.40809e-05	-0.000924022	-0.00332	-0.00452	-0.00524	-0.00602	-0.00645	-0.00715	-0.00801	-0.0077	-0.00859	-0.0081
719.432	-4.27965e-05	-1.96759e-05	4.56638e-05	1.79066e-05	6.09259e-05	2.8496e-05	-3.70158e-05	-8.40186e-06	1.52938e-05	1.82436e-05	1.47411e-05	-5.17249e-05	-2.37501e-05	6.56738e-07	-1.85623e-05	1.45124e-05	2.32971e-05	5.28011e-05	7.33668e-05	1.61518e-05	3.81861e-05	3.55501e-06	-4.0985e-05	-2.12975e-05	-6.65657e-06	2.48804e-05	1.30344e-05	1.1409e-06	-0.00014041	-1.28622e-05	-2.17068e-05	2.93688e-05	0.000145582	-5.67254e-05	-8.50135e-07	-1.31056e-05	-3.2416e-05	-9.92253e-05	-0.000946648	-0.00358	-0.00471	-0.00557	-0.0064	-0.00679	-0.0075	-0.00844	-0.00812	-0.00904	-0.00857
720.627	-8.56441e-05	2.05303e-05	-2.67271e-05	6.27589e-06	0.00012494	-1.43822e-05	-5.21542e-05	-4.56487e-05	8.64445e-06	-2.17472e-07	8.68657e-05	-3.51687e-07	2.1423e-05	1.92065e-06	-4.54742e-05	7.14137e-05	0.000162944	-1.43696e-05	5.17749e-05	6.03511e-05	1.51306e-05	-2.70106e-05	-8.16976e-06	3.09834e-05	-8.34039e-05	-8.44331e-05	1.33029e-05	1.81747e-05	-4.42359e-05	6.49029e-05	6.74396e-05	4.67147e-05	5.63493e-05	-1.13906e-05	4.96573e-05	-2.78026e-05	-3.38016e-05	-0.000134053	-0.00106	-0.00371	-0.00513	-0.00605	-0.00676	-0.00734	-0.00807	-0.0089	-0.00863	-0.00957	-0.00918
721.822	-2.23982e-05	-7.63854e-06	0.000118675	-3.2536e-05	4.23535e-05	7.11186e-06	3.49084e-05	1.86237e-05	-3.44092e-05	-2.74224e-05	7.97783e-05	-0.000123493	1.35122e-05	4.35528e-05	-0.000110619	5.7676e-05	7.42519e-05	7.36387e-05	2.39442e-05	0.00012805	-3.52031e-06	-8.8885e-05	2.49003e-05	4.51859e-05	-4.42628e-05	2.87265e-05	0.000156642	1.5507e-05	-5.60186e-05	-9.23453e-06	4.93916e-05	9.56884e-05	0.000156061	-6.18982e-06	1.93339e-05	-5.61857e-06	-7.40919e-05	-0.000158557	-0.00109	-0.00393	-0.00556	-0.00643	-0.00726	-0.0078	-0.00856	-0.00941	-0.00911	-0.01019	-0.00973
723.017	6.98832e-05	-6.91311e-06	-3.83692e-05	1.94983e-05	-1.84288e-05	3.59339e-05	4.46686e-06	1.32363e-05	8.99063e-06	-3.01839e-05	3.98929e-05	-4.56545e-05	-2.87478e-05	4.30606e-05	-6.66653e-05	5.10284e-05	-3.45594e-06	-1.85069e-05	5.55494e-05	6.23777e-05	2.11072e-05	-9.63968e-06	2.56312e-05	3.36592e-05	4.29671e-05	5.61498e-06	7.2555e-06	2.76762e-05	-5.68701e-06	8.33928e-05	1.45742e-05	6.25863e-05	6.08936e-05	2.11734e-05	-2.55303e-05	-3.88898e-05	7.9555e-06	-7.94105e-05	-0.0012	-0.00425	-0.00597	-0.0069	-0.00779	-0.00834	-0.00902	-0.01	-0.00961	-0.01074	-0.01028
724.213	-4.17097e-05	-3.17608e-06	-3.61965e-05	4.03783e-06	5.2684e-05	3.39445e-05	-8.94827e-06	1.22041e-05	-1.32135e-05	-6.18366e-05	1.6536e-05	1.22349e-05	4.22701e-06	2.79316e-05	1.28059e-06	9.73448e-05	-3.08176e-05	3.44401e-05	-2.24728e-05	-4.3863e-05	6.25459e-05	-2.03402e-05	-4.03584e-05	3.79539e-05	-4.60508e-05	-9.16496e-05	-4.94337e-05	-6.62594e-06	-0.000105585	9.26526e-06	-7.82586e-05	5.08838e-05	-5.29048e-05	-0.000130213	1.26862e-05	-5.06738e-05	-6.66712e-05	-9.28564e-05	-0.00127	-0.00448	-0.00634	-0.00734	-0.00829	-0.00881	-0.00953	-0.01056	-0.01019	-0.01121	-0.0109
725.408	1.41449e-05	-6.33068e-06	1.45249e-05	2.86164e-05	3.11923e-05	-1.76161e-08	-2.69803e-05	1.82868e-06	1.03007e-05	-6.15338e-05	4.11664e-05	-2.90959e-05	2.68859e-06	3.9122e-05	-5.96265e-05	-1.61064e-05	-1.67619e-05	3.65027e-05	1.81165e-05	1.69443e-05	4.15274e-05	-9.26358e-05	-0.000114304	1.06634e-05	5.96518e-05	-6.06423e-06	8.15557e-05	1.85538e-05	-0.000107695	-7.7159e-06	6.03126e-05	-4.12817e-05	3.81735e-05	2.32051e-05	9.50751e-06	6.2449e-05	-4.91299e-05	-0.000115774	-0.00126	-0.00468	-0.00666	-0.0077	-0.00863	-0.00922	-0.00996	-0.01091	-0.01067	-0.01188	-0.01146
726.604	-3.10054e-05	1.89594e-05	-4.38575e-06	4.97005e-05	3.19968e-05	-1.31238e-05	5.06392e-05	2.23545e-05	-2.66684e-05	1.64748e-05	-1.2563e-05	-6.64578e-05	1.5664e-05	-6.65468e-06	-4.49303e-05	6.94926e-05	-5.25835e-05	4.59231e-05	1.10492e-05	-9.64772e-05	9.70356e-05	-3.01231e-05	-1.33365e-05	-8.65686e-05	6.16415e-05	-9.01765e-05	6.52345e-05	2.09722e-05	-7.00664e-06	-6.94274e-05	3.96963e-05	5.70157e-05	3.50939e-05	8.21601e-05	-2.13761e-05	-3.91414e-05	4.68879e-06	-0.000166309	-0.0013	-0.00497	-0.0071	-0.00825	-0.00911	-0.0097	-0.01048	-0.01152	-0.01124	-0.01254	-0.01206
727.8	-7.23327e-05	7.99563e-05	-7.56358e-06	2.08916e-05	1.38665e-05	6.09248e-05	7.81464e-06	1.54526e-05	-9.31113e-06	9.41567e-05	0.000101063	-0.000116411	1.51211e-05	-0.000167021	-3.66074e-05	4.25941e-05	1.34813e-05	4.52148e-05	4.63577e-05	-8.35631e-06	1.45989e-05	-2.63644e-05	6.87301e-05	-6.00387e-05	1.28809e-05	-2.53975e-05	5.8149e-05	1.74074e-05	-7.37565e-05	3.01982e-05	2.6529e-05	3.08091e-05	1.8084e-05	-7.99548e-05	-6.90921e-06	7.53578e-06	1.02565e-05	-6.33779e-05	-0.00132	-0.00515	-0.00741	-0.00851	-0.0094	-0.01005	-0.01092	-0.01191	-0.01159	-0.013	-0.0125
728.996	-7.77709e-05	-4.96634e-06	9.18225e-06	6.49367e-06	7.7534e-05	3.16147e-05	7.43365e-06	-1.34384e-05	3.03217e-05	8.35074e-06	1.93432e-06	-4.74235e-05	-0.000106521	2.33951e-05	5.38604e-05	3.26252e-05	6.49438e-05	4.99959e-05	3.53208e-05	1.18434e-05	4.63679e-05	-2.25785e-05	-6.3575e-05	-1.27524e-05	1.62934e-05	-2.2304e-05	-5.38373e-06	-4.20258e-05	1.14568e-05	7.69885e-05	3.11952e-05	5.07228e-05	1.8861e-05	-3.58849e-05	4.31892e-05	2.01112e-05	-7.33457e-05	-2.19469e-05	-0.00129	-0.00536	-0.00777	-0.00896	-0.00991	-0.01049	-0.01136	-0.01252	-0.01209	-0.01344	-0.01301
730.192	-1.28583e-05	3.2448e-05	4.39609e-05	7.25034e-06	3.56227e-05	3.61621e-05	-3.34763e-05	4.79285e-05	-7.06376e-05	-6.92229e-05	3.50471e-06	-7.09969e-06	-2.3863e-05	1.18947e-05	-1.61422e-06	1.94461e-05	-4.20157e-05	0.000117629	-2.67928e-05	4.05595e-05	-3.56465e-05	-1.53803e-05	1.80497e-05	-8.65609e-05	-2.89245e-05	-8.63233e-06	2.04095e-05	-2.98909e-07	-2.53953e-05	2.37532e-05	2.90951e-05	4.45752e-05	-3.94401e-06	-2.3723e-05	7.69529e-05	2.65771e-05	2.49949e-05	-8.14847e-05	-0.00133	-0.00565	-0.00816	-0.00941	-0.01031	-0.01091	-0.01189	-0.0129	-0.01262	-0.01402	-0.01356
731.388	-2.91157e-05	9.35858e-05	3.33724e-05	-3.18604e-05	6.39803e-05	3.19889e-05	-7.00164e-05	2.39229e-05	-3.62203e-05	5.89067e-05	-3.31491e-06	-1.65079e-05	-8.31134e-05	4.37875e-05	-7.93954e-05	7.88231e-07	-3.78318e-06	7.11791e-05	1.38876e-05	-5.07654e-05	5.06264e-05	4.87379e-06	6.85209e-05	7.26193e-05	4.15024e-05	3.79305e-05	4.71735e-05	-2.58104e-05	3.57092e-05	-3.43555e-05	5.11454e-05	7.92459e-05	-6.1996e-05	3.37574e-05	7.62525e-05	3.75137e-05	6.42136e-05	-5.8008e-05	-0.00136	-0.00578	-0.00846	-0.00972	-0.01075	-0.01133	-0.01235	-0.01335	-0.01307	-0.01451	-0.01416
732.585	-2.66024e-05	8.34554e-05	-2.00015e-05	-1.76546e-05	-1.34511e-06	4.5398e-06	-3.0069e-06	2.72083e-05	-2.7519e-05	3.54699e-05	-2.28629e-05	-4.50141e-05	4.23981e-05	-9.31554e-06	-1.97495e-05	-9.65871e-06	3.11998e-05	6.1765e-05	-4.98238e-05	-8.92796e-06	-2.62341e-05	-3.55589e-05	5.54358e-05	2.1722e-05	2.62307e-05	-3.14785e-05	9.15399e-05	-2.93318e-05	-4.51034e-05	-8.21545e-06	-1.28747e-06	7.39388e-05	1.39678e-05	-5.90916e-06	1.97475e-05	-3.60938e-05	9.32833e-06	-7.78499e-05	-0.00143	-0.00605	-0.00892	-0.01019	-0.01125	-0.01184	-0.01283	-0.01392	-0.01358	-0.01516	-0.01466
733.781	-3.92015e-05	4.50056e-05	-6.24718e-05	-7.74005e-06	-1.89983e-05	4.84191e-05	4.05066e-05	1.84797e-05	-3.32667e-05	-1.79209e-05	8.89892e-05	-2.97062e-05	-7.12231e-06	1.77497e-05	-4.27222e-05	3.37855e-05	6.93685e-05	4.57456e-05	6.34598e-05	-3.78675e-05	3.22707e-05	2.916e-06	3.20421e-05	4.69788e-05	-2.61318e-06	8.5618e-06	9.65459e-06	-7.44436e-05	-4.24688e-05	-1.09713e-05	5.01471e-05	5.4004e-05	-5.11222e-05	4.59888e-05	2.80818e-05	-3.76174e-05	1.7356e-05	-0.000125198	-0.00155	-0.00628	-0.00913	-0.01048	-0.01155	-0.01217	-0.01311	-0.01425	-0.01388	-0.01558	-0.01514
734.978	-6.30126e-06	7.90608e-05	-1.01455e-05	-5.189e-05	2.0256e-05	4.03221e-05	-1.73149e-06	2.17794e-05	-5.69321e-05	-2.32425e-05	5.90456e-05	1.55831e-06	1.93474e-06	-8.84632e-06	-6.4868e-05	8.09375e-05	-9.62198e-06	2.85679e-05	6.08854e-05	1.2018e-05	1.81162e-05	-7.89577e-06	4.88211e-05	-5.52833e-06	-4.58938e-06	-4.5691e-05	1.21054e-05	3.10189e-05	2.06767e-05	1.09633e-05	4.37465e-05	2.03333e-05	-3.78832e-05	1.38595e-05	2.42641e-05	4.7401e-05	-5.45382e-05	-0.000179319	-0.00149	-0.0064	-0.00944	-0.01079	-0.01184	-0.01256	-0.01343	-0.01463	-0.01428	-0.01593	-0.0156
736.175	-3.12142e-05	2.73181e-05	-1.49139e-05	-1.09486e-05	-4.54338e-05	2.7603e-05	-2.36519e-05	-1.49425e-05	-3.0731e-07	1.53856e-05	6.98156e-06	-3.12514e-05	2.79249e-05	8.51077e-05	-1.76574e-05	-1.08747e-05	3.16353e-05	-2.65627e-05	9.57952e-07	-1.45033e-05	3.20135e-05	1.66291e-06	3.24164e-05	1.80486e-05	-1.85306e-06	-8.11553e-05	2.31881e-05	-1.05613e-05	3.14308e-05	-5.52644e-05	6.51979e-06	8.99874e-05	7.3238e-05	5.31816e-05	4.2546e-05	-2.41524e-05	3.67466e-06	-0.000145313	-0.00152	-0.00652	-0.00971	-0.01097	-0.01212	-0.01269	-0.01371	-0.01485	-0.01458	-0.0163	-0.01593
737.371	-4.99822e-05	6.25991e-06	8.66421e-06	-1.20464e-05	2.83893e-05	1.04876e-05	4.03157e-05	4.9564e-05	-8.22892e-05	1.04379e-05	9.95714e-06	4.2587e-06	-1.84046e-05	-1.44902e-05	8.87811e-06	1.85147e-05	1.59995e-05	-2.3712e-05	5.46561e-05	-4.19645e-05	-5.43372e-06	-2.32706e-05	2.24456e-05	-4.48434e-05	-4.14342e-05	-2.57204e-05	8.69738e-06	1.61172e-05	1.88544e-05	2.67803e-05	4.32357e-05	4.7423e-05	7.34872e-05	1.27608e-05	6.73474e-05	-2.07251e-05	-4.15111e-05	-9.73602e-05	-0.0015	-0.00662	-0.00991	-0.01126	-0.01233	-0.01291	-0.01392	-0.01521	-0.01476	-0.01665	-0.0163
738.569	-3.15043e-05	4.87735e-05	-8.03642e-05	1.93846e-05	5.03029e-05	-2.53343e-06	-2.81243e-06	5.21831e-05	-2.60646e-05	-2.78558e-05	6.35981e-05	-1.62638e-05	-4.06089e-05	4.68587e-05	-5.30934e-05	3.62017e-05	3.69852e-05	3.39477e-05	3.45078e-05	3.95895e-05	1.80358e-06	2.83678e-05	4.71313e-05	6.55362e-05	1.88978e-05	-5.24733e-05	7.75043e-05	6.84762e-06	-1.74906e-05	1.81554e-05	6.74759e-05	1.32036e-05	1.63326e-05	7.2796e-05	1.68964e-05	7.86258e-05	7.37974e-05	-4.8775e-05	-0.00142	-0.00659	-0.00998	-0.01131	-0.0124	-0.013	-0.01402	-0.01523	-0.01489	-0.0168	-0.01647
739.766	-4.61554e-05	4.46308e-05	-6.28276e-05	4.22415e-05	-5.64564e-07	-1.8543e-05	2.13092e-05	-1.46801e-06	1.98515e-05	-3.40445e-05	1.49973e-05	3.74327e-05	-1.58541e-05	1.7159e-06	-2.72184e-06	2.16249e-05	7.82072e-06	-1.24128e-05	-6.28547e-06	-1.99397e-05	-5.94565e-06	1.48549e-06	-2.30882e-05	9.58316e-06	-1.99325e-05	-1.15229e-05	3.13919e-05	-1.39567e-05	-1.77441e-06	2.16922e-05	3.46187e-05	8.41267e-06	4.4296e-05	6.75386e-05	-2.63056e-06	7.012e-05	5.4944e-05	-8.86095e-06	-0.00141	-0.00664	-0.01014	-0.01147	-0.01251	-0.01315	-0.01419	-0.01538	-0.01511	-0.01694	-0.0168
740.963	-5.23324e-05	1.09693e-05	-5.96189e-06	3.34455e-05	-5.7528e-05	5.33671e-05	5.39738e-05	1.57965e-05	-1.18795e-05	1.57877e-05	3.62319e-05	8.0309e-07	-6.25282e-05	-1.11831e-06	-2.90266e-05	3.31505e-05	-1.29963e-05	-1.25979e-05	3.14856e-05	1.97583e-05	3.85668e-05	-8.80925e-06	-1.25599e-05	-3.47811e-05	-4.1326e-05	-2.44924e-05	3.63863e-06	-3.96544e-05	-1.30021e-05	-1.13285e-05	4.97077e-05	-3.93418e-05	7.23292e-05	5.42059e-06	5.54552e-05	0.000126946	4.76614e-05	1.08053e-05	-0.00141	-0.00656	-0.01011	-0.01138	-0.01246	-0.01309	-0.01414	-0.01539	-0.01503	-0.01705	-0.01684
742.161	-2.80625e-05	3.04936e-05	3.24943e-05	-2.9491e-05	4.85332e-06	-1.20816e-05	-2.54888e-05	3.46974e-05	1.69706e-05	-7.41407e-07	4.1118e-06	-1.92485e-05	4.18362e-05	-4.56794e-05	-4.66396e-06	-2.43706e-05	1.28636e-05	4.08577e-05	2.55187e-05	4.20424e-05	6.64555e-05	-2.44377e-05	-2.29453e-05	-5.56514e-05	8.87076e-06	-5.43688e-05	3.25199e-05	-2.4695e-05	2.51545e-05	5.79111e-06	-2.49087e-05	-7.71464e-06	2.46368e-05	-2.22623e-05	6.35883e-06	4.57773e-05	4.24758e-05	2.27583e-05	-0.00142	-0.00652	-0.00997	-0.0113	-0.0124	-0.01306	-0.01403	-0.01521	-0.01494	-0.017	-0.01689
743.358	1.71066e-05	3.08965e-05	-1.25858e-05	1.54666e-05	3.38711e-06	-2.62753e-05	2.54501e-05	-6.20894e-06	-1.40836e-05	-3.43688e-05	7.85536e-05	-2.76658e-05	-1.4782e-05	3.59968e-05	-7.08872e-05	4.33065e-05	4.64155e-06	4.04866e-05	4.18479e-06	-1.66541e-05	2.79986e-05	-2.10103e-05	1.06432e-05	-5.59551e-06	-9.36092e-06	-2.00779e-05	-2.76841e-06	-8.19547e-06	-2.84374e-05	5.70054e-06	4.91866e-05	1.97629e-05	1.93012e-05	1.32367e-05	1.9849e-05	0.000152707	2.52671e-05	-6.4123e-05	-0.00138	-0.00638	-0.00989	-0.01114	-0.01227	-0.01285	-0.01391	-0.01512	-0.01484	-0.01697	-0.01683
744.556	-4.83461e-05	1.24867e-05	-4.49331e-05	5.01238e-05	1.3399e-05	2.34549e-05	-4.46894e-05	1.62583e-05	-1.43066e-05	-1.77959e-06	2.65295e-05	3.87603e-05	-5.30235e-05	4.20083e-05	-1.59424e-05	6.85602e-05	-1.48402e-05	9.76724e-05	-5.14597e-05	2.56637e-05	2.70448e-06	1.21785e-05	-5.63926e-05	1.07259e-05	-2.27239e-05	-3.34126e-07	2.40188e-05	3.16263e-06	5.46168e-05	3.07172e-05	2.68202e-05	2.92668e-05	8.47781e-05	-7.07407e-06	9.20668e-05	5.07692e-05	-5.02205e-06	-4.52874e-05	-0.00135	-0.00622	-0.00964	-0.01085	-0.01197	-0.01252	-0.0136	-0.01486	-0.01465	-0.01685	-0.01674
745.754	7.50223e-06	1.12582e-05	-1.77252e-05	6.59901e-06	6.45851e-05	1.35554e-05	8.90129e-06	-1.26114e-05	-5.77723e-06	-2.74704e-06	3.56327e-06	-2.74312e-05	-5.85996e-05	3.91033e-05	-3.01761e-05	3.30752e-05	1.62433e-05	3.71529e-05	-3.09644e-05	3.09671e-05	-5.32159e-06	2.00139e-05	-7.67405e-05	1.84574e-05	6.00017e-05	2.17037e-06	4.72026e-05	-5.90409e-06	5.10941e-05	6.23545e-05	-1.51074e-05	-3.34037e-05	7.41978e-05	2.11435e-05	7.4593e-05	8.03398e-05	9.14851e-05	-1.55125e-05	-0.00129	-0.00589	-0.00923	-0.01046	-0.01151	-0.01209	-0.01314	-0.01435	-0.01412	-0.0164	-0.01639
746.952	6.33211e-06	-1.38433e-05	-1.48499e-05	9.06505e-06	2.01186e-05	4.4298e-05	2.83931e-05	6.05462e-06	-5.35008e-05	1.846e-05	4.55572e-05	-2.10609e-05	-5.93588e-05	3.72066e-05	-5.28717e-05	8.12089e-05	8.06377e-05	4.07806e-05	-2.32474e-05	5.33713e-06	5.21741e-05	1.58072e-05	-2.87782e-05	-3.86295e-05	-2.20388e-05	-1.81853e-05	-1.22778e-05	6.80309e-05	2.01497e-05	6.74522e-05	-1.36635e-05	-2.86177e-05	2.93646e-05	-3.46799e-05	4.82119e-05	-7.62081e-06	8.88892e-05	-4.58332e-05	-0.00126	-0.00551	-0.00866	-0.00973	-0.01078	-0.01139	-0.01249	-0.01368	-0.01349	-0.01586	-0.01591
748.15	-3.89612e-05	7.19021e-06	-3.29119e-05	-1.5406e-05	2.61926e-05	4.96937e-05	-1.25435e-05	3.98962e-05	-3.35378e-06	6.9349e-06	1.8487e-05	-8.89688e-07	-6.46203e-07	-2.94223e-05	-1.426e-05	-1.54055e-05	6.4102e-05	1.40088e-06	-9.6033e-06	3.18993e-05	3.24285e-05	2.2312e-06	-2.88113e-05	-2.7273e-07	3.18381e-05	-1.44907e-05	8.01949e-06	2.98419e-05	4.20602e-05	7.4505e-05	4.84442e-05	-1.56562e-05	-3.24483e-05	-4.78395e-05	-4.71321e-05	2.72652e-05	8.5475e-05	-2.90583e-05	-0.00115	-0.00514	-0.00807	-0.00911	-0.01019	-0.01075	-0.01186	-0.01312	-0.01297	-0.01539	-0.0156
749.348	-5.32311e-05	3.8077e-05	-3.91177e-05	5.04531e-05	1.0442e-05	3.93376e-05	1.60946e-05	3.56627e-05	-6.13194e-05	-1.15366e-05	2.91381e-05	-5.88662e-06	-4.49489e-05	1.05719e-05	-1.37368e-05	2.99571e-05	4.48254e-05	6.35162e-06	1.05275e-05	1.97631e-05	-5.08458e-05	1.07399e-05	2.54168e-06	2.1062e-05	1.57708e-05	8.67573e-07	6.36085e-06	2.39567e-05	3.60579e-05	5.36621e-05	5.81605e-08	1.16122e-05	-4.77854e-05	-8.3448e-05	-1.03203e-06	6.07946e-05	7.53487e-05	-1.4133e-05	-0.000965349	-0.0048	-0.00759	-0.0085	-0.0095	-0.01012	-0.01117	-0.01245	-0.01238	-0.01485	-0.01508
750.547	-5.52276e-05	1.00855e-05	-3.50358e-05	-2.767e-06	6.04966e-05	2.80874e-05	2.01507e-05	1.51347e-06	-2.84565e-06	5.31425e-05	4.50663e-06	-1.55259e-05	-4.69891e-05	3.0366e-05	-4.99579e-05	7.03425e-05	3.3158e-05	5.83432e-05	3.83853e-05	1.66596e-05	-1.52e-05	5.02029e-05	-4.07736e-05	-2.18464e-05	2.62154e-05	6.57355e-06	1.5123e-05	-3.90517e-05	6.22117e-05	6.57934e-05	-5.97755e-05	-4.71839e-05	-5.74736e-05	-0.000100419	-7.26852e-05	-3.46823e-05	6.24446e-05	-9.6363e-05	-0.000876554	-0.00431	-0.00699	-0.00773	-0.00864	-0.00921	-0.01033	-0.01153	-0.01153	-0.01392	-0.0142
751.745	-7.82061e-05	1.13816e-05	9.75581e-06	3.27474e-05	5.22025e-05	3.16148e-05	2.67411e-06	5.58026e-05	-8.15126e-07	6.16042e-05	-2.35342e-05	2.96995e-05	-0.000116934	3.06041e-05	-9.85968e-05	5.83111e-05	6.61508e-05	2.31682e-05	6.24575e-05	1.98014e-05	2.02653e-05	-4.12914e-05	1.31469e-05	1.01056e-05	4.22399e-05	-2.88658e-05	-8.77981e-06	3.30033e-05	5.73112e-05	2.69336e-05	3.93889e-05	-2.00888e-05	-3.06208e-05	-8.69998e-05	-6.23517e-05	-3.25638e-05	2.69638e-05	-2.35896e-05	-0.000736767	-0.00381	-0.0062	-0.00681	-0.00773	-0.00832	-0.00932	-0.0104	-0.01046	-0.01285	-0.01317
752.944	-4.57584e-05	4.71136e-05	4.60323e-06	3.33428e-05	1.35919e-05	1.07329e-05	-2.04252e-05	-2.22066e-05	5.17339e-06	2.10373e-05	4.16162e-05	2.29312e-05	-3.45268e-05	-2.4503e-05	-5.27226e-05	0.000104658	7.93513e-05	1.10608e-05	1.42553e-05	8.54695e-05	4.88995e-05	3.73873e-05	1.043e-05	-5.07055e-05	-3.03397e-05	-3.00738e-05	1.22093e-05	2.89733e-05	6.04712e-05	5.91614e-05	-4.08153e-06	-6.45198e-05	-4.85811e-05	-9.62021e-05	-0.000157497	-0.000185942	-9.6579e-05	-9.26049e-05	-0.000586581	-0.00327	-0.00523	-0.00576	-0.00662	-0.00708	-0.00803	-0.00915	-0.00926	-0.01151	-0.01186
754.143	-4.29855e-05	4.74069e-05	-2.82063e-05	1.86981e-05	2.86635e-05	1.7962e-05	3.41561e-05	-2.29654e-06	-5.40976e-05	9.5562e-06	2.47692e-05	3.17148e-05	-1.50058e-05	-1.4678e-05	-5.5657e-05	0.000118282	8.07103e-05	5.45819e-05	3.62502e-05	3.31999e-05	5.22956e-05	-2.24812e-05	-3.96035e-06	1.90667e-07	5.61194e-05	1.98963e-05	2.11722e-05	1.8228e-05	1.68916e-05	6.64721e-05	6.65736e-07	-5.11405e-05	-1.60445e-05	-0.000129002	-0.000167446	-0.000285771	-0.000242902	-0.00012753	-0.000508116	-0.00267	-0.00442	-0.00481	-0.00555	-0.00606	-0.00697	-0.00808	-0.00822	-0.01047	-0.01096
755.342	-6.18645e-05	-6.6838e-06	-2.43627e-05	-3.81695e-05	-7.56148e-06	4.28807e-05	5.81086e-05	6.09468e-05	-3.13994e-05	6.42436e-06	3.08584e-05	-1.50538e-05	-2.00538e-05	7.65168e-05	-7.05866e-05	0.000113208	5.27837e-05	4.96375e-05	-1.60725e-05	3.20453e-05	7.93065e-05	-6.29907e-08	2.00332e-05	-3.16628e-05	7.97343e-07	-8.39617e-06	2.71486e-05	8.06552e-05	0.000102284	0.000113286	8.67817e-06	3.21804e-05	-2.88998e-05	-0.000158209	-0.000222244	-0.000350208	-0.000386859	-0.000407721	-0.000549086	-0.00233	-0.00389	-0.00403	-0.00468	-0.00512	-0.00608	-0.00717	-0.00733	-0.00963	-0.01018
756.541	-2.40128e-05	3.02811e-05	-1.13277e-05	3.07474e-05	1.46244e-05	-2.17006e-05	5.64623e-05	3.92301e-05	-1.42312e-05	9.1295e-06	2.83078e-05	-5.19457e-05	-1.88975e-05	4.31679e-05	-0.000109835	5.70855e-05	2.28329e-05	5.21868e-05	3.20335e-05	7.0346e-05	1.55384e-05	2.96104e-06	4.05114e-05	-2.23276e-07	-3.00098e-05	4.04035e-05	-1.39244e-05	5.25414e-05	4.38711e-05	4.68474e-05	3.42424e-05	-1.93631e-05	-9.26525e-06	-7.38678e-05	-0.000213827	-0.000269754	-0.000454831	-0.000581203	-0.000774911	-0.00222	-0.00357	-0.00359	-0.00409	-0.00459	-0.00545	-0.00656	-0.00686	-0.009	-0.00965
757.74	-6.83957e-06	1.99247e-05	-4.11629e-05	3.11998e-05	4.01902e-05	1.11575e-05	4.77189e-05	-2.64191e-05	1.30798e-05	1.57992e-05	4.63091e-05	-4.04971e-05	-4.00344e-05	4.33257e-06	-7.47586e-05	4.09704e-05	-9.96853e-06	3.12304e-05	6.56553e-05	-1.96129e-05	6.02023e-06	3.15103e-05	-4.7369e-06	7.05219e-07	-2.3589e-05	2.69988e-05	-3.42597e-05	2.08711e-05	-1.2533e-05	7.42845e-05	-2.47967e-05	-5.59251e-05	6.5662e-05	1.54791e-05	-9.28313e-05	-0.000206389	-0.000432231	-0.000578634	-0.000873625	-0.00205	-0.00321	-0.00317	-0.00361	-0.0041	-0.00487	-0.00583	-0.00619	-0.00809	-0.00883
758.94	-5.12574e-05	1.01655e-05	-5.33811e-05	5.40669e-05	3.11724e-05	6.65002e-05	3.59254e-06	1.58445e-05	-2.35406e-05	2.27257e-05	3.53975e-05	-4.48835e-05	-6.33849e-05	4.16877e-05	-4.47053e-05	6.07998e-05	1.05956e-05	-2.05106e-06	6.40076e-05	-2.44632e-05	-4.23775e-05	2.62379e-05	4.39152e-06	2.25489e-05	3.47061e-05	2.01107e-05	-9.60491e-06	1.30495e-06	1.92574e-05	2.0328e-05	-2.06436e-05	2.11138e-05	7.10286e-05	7.18301e-05	-2.41581e-06	-8.81481e-05	-0.000270651	-0.000414749	-0.000657662	-0.00175	-0.00272	-0.00268	-0.00304	-0.00348	-0.00417	-0.00517	-0.00547	-0.00716	-0.00784
760.139	-4.3268e-05	-3.6357e-05	2.67821e-05	-2.39789e-05	3.11263e-05	4.34357e-05	4.50723e-06	-1.27963e-07	6.8158e-06	5.49493e-05	1.6024e-05	-2.64576e-06	-3.2343e-05	1.82342e-05	-6.31541e-05	1.06348e-05	-1.59143e-06	2.93317e-05	3.91351e-05	1.46838e-05	-3.96805e-05	1.97677e-05	-1.0104e-05	-1.49651e-06	-2.77429e-05	-5.9275e-05	-1.92454e-05	-3.23632e-05	-1.32762e-05	4.72816e-05	3.61722e-05	2.18809e-05	0.000103486	0.000114043	0.000133975	0.000100632	-1.84914e-05	-0.000123458	-0.000349501	-0.00112	-0.00181	-0.00183	-0.00214	-0.00259	-0.00315	-0.004	-0.00439	-0.00589	-0.0065
761.339	-9.44419e-05	2.22298e-05	-1.91077e-05	-4.8199e-05	3.88884e-05	1.81916e-05	6.70836e-05	3.02926e-05	-2.14526e-05	4.49779e-05	3.31527e-05	-2.06435e-05	-3.41871e-05	3.94747e-05	-5.62597e-05	5.79886e-05	3.05053e-05	9.71879e-05	5.31868e-06	-2.29637e-06	-4.9918e-05	2.66988e-05	1.19146e-05	-2.64398e-06	-5.2668e-06	9.40427e-07	1.61139e-05	2.62787e-05	4.69498e-05	1.68066e-06	3.81526e-05	2.88673e-05	0.000120396	5.65516e-05	0.00017155	0.000219336	0.000154825	0.000119766	-3.47836e-05	-0.000448996	-0.000915232	-0.000877263	-0.00117	-0.00143	-0.00202	-0.00281	-0.00314	-0.00463	-0.00524
762.539	-9.48638e-05	1.97532e-06	2.52313e-05	1.11631e-05	4.78777e-05	-1.18082e-05	2.08553e-05	6.59695e-05	-6.98399e-05	-1.00761e-05	6.87692e-05	-4.65612e-05	2.46643e-05	1.56758e-05	-4.90323e-05	7.56667e-05	-2.14861e-06	6.88329e-05	2.82375e-05	6.03739e-06	-5.24526e-06	-1.25807e-06	-1.1959e-06	-1.5808e-05	-3.38993e-05	-9.49559e-06	-1.48797e-05	-2.39258e-05	2.77521e-06	5.74041e-05	-4.46882e-05	1.358e-05	1.02392e-05	5.72762e-06	0.000183122	0.000248917	0.000356843	0.000307261	0.000345574	9.93226e-05	-7.49362e-05	-8.08436e-05	-0.000357511	-0.000571806	-0.00106	-0.00179	-0.0021	-0.00346	-0.00407
763.738	-1.04467e-05	-1.20312e-05	-2.1198e-05	-8.14008e-05	6.34248e-05	5.22244e-05	-2.227e-05	-8.53104e-06	-3.95215e-05	5.73336e-05	6.69007e-05	6.51025e-05	-1.84585e-05	-1.37309e-05	-7.73972e-05	4.93238e-05	-1.69156e-05	6.62833e-05	4.35541e-05	4.30364e-05	-6.3568e-06	-1.93942e-05	3.72547e-05	1.56785e-05	2.03602e-05	-5.10553e-05	-5.22892e-05	2.1616e-05	-4.29497e-07	-4.35598e-05	-6.24242e-06	-4.6673e-05	-4.82805e-05	3.73486e-05	0.000113402	0.000260615	0.000347808	0.000463791	0.000631482	0.000667763	0.000705487	0.000778614	0.000581479	0.000466412	-7.41004e-05	-0.000659941	-0.00105	-0.00223	-0.00291
764.938	-4.04171e-05	1.16257e-05	-6.48098e-05	1.46281e-05	-1.94533e-05	3.52338e-05	7.41722e-05	3.84867e-05	-5.55642e-05	4.89133e-05	1.65774e-05	4.01353e-05	-7.84741e-05	6.73463e-05	-8.84002e-05	0.000106272	3.06677e-05	4.38464e-05	1.94246e-05	1.03697e-05	5.06375e-05	-3.05734e-06	6.54721e-05	5.86198e-05	1.91811e-05	-1.45134e-05	6.69304e-05	-6.90809e-05	1.1493e-05	-6.87821e-07	9.90579e-05	-2.90052e-05	-3.02547e-05	1.82999e-05	0.000120627	0.000206946	0.000358289	0.000492041	0.000695395	0.00102	0.00122	0.00155	0.00143	0.00127	0.000763933	0.000231658	-0.000150861	-0.00134	-0.00199
766.139	-5.80352e-05	4.432e-05	-2.28959e-06	-5.55533e-05	-9.67726e-06	3.66775e-05	-1.11678e-05	3.80637e-05	-2.424e-05	-2.04371e-05	6.00649e-05	5.23632e-05	-3.0089e-06	1.52643e-05	-6.23443e-05	-7.39408e-06	-4.95862e-05	6.02429e-05	-8.15858e-06	7.25284e-05	-3.91016e-05	2.8315e-05	2.93916e-06	-1.78162e-05	-1.91952e-05	-4.75796e-06	1.90684e-05	-5.56176e-05	3.7719e-06	4.43381e-06	2.69328e-05	2.90399e-05	6.29511e-06	-1.67495e-06	0.000140269	0.000127176	0.000289418	0.000294716	0.000642066	0.00125	0.00169	0.00213	0.00227	0.00205	0.00146	0.0011	0.000699023	-0.000493746	-0.000973186
767.339	-2.98443e-05	0.000129551	-7.03991e-05	9.3113e-06	1.25955e-05	7.37706e-05	-4.86585e-05	9.10317e-05	3.54954e-05	-4.1367e-05	-4.14261e-05	-2.62068e-05	-4.18489e-05	7.96761e-05	-0.000131681	-6.33622e-05	3.5397e-05	3.6623e-05	-3.03716e-05	5.57162e-05	-6.91112e-05	7.45351e-06	-9.23304e-05	8.06632e-07	8.52311e-05	-2.11615e-07	0.000126042	4.80373e-05	9.68552e-06	4.31027e-05	4.16459e-05	-4.49322e-05	5.256e-05	1.12311e-05	3.75571e-05	0.000156833	0.000206145	0.00027281	0.000486813	0.00137	0.0023	0.00281	0.00303	0.0028	0.00223	0.00192	0.00153	0.00043902	-0.00018509
768.539	-3.94785e-06	5.10383e-05	-0.000110755	-4.88815e-05	-7.45648e-05	0.000164409	2.57125e-05	3.18819e-05	-4.476e-05	2.78073e-05	3.34879e-05	6.4321e-05	-1.06829e-05	-2.14238e-05	-8.36412e-05	6.76236e-05	0.000100055	-6.15061e-05	-5.94113e-05	0.000119859	-9.55812e-06	-8.77105e-07	4.24075e-05	-0.000130726	3.12607e-05	5.33888e-05	-7.73264e-05	5.77564e-05	6.11678e-05	-1.7728e-05	3.74163e-05	8.49273e-05	3.65856e-05	-0.000119434	7.3854e-05	-9.26148e-05	0.000108071	0.000112409	0.000331765	0.00152	0.00243	0.00322	0.00349	0.00336	0.00267	0.00234	0.00207	0.00106	0.0004035
769.74	-5.42827e-05	2.16312e-05	2.04943e-05	-8.72008e-06	2.69205e-05	9.4428e-05	-2.63623e-05	9.69616e-05	-4.13025e-05	-6.46446e-05	1.7758e-05	4.64572e-05	-0.000163732	-1.26785e-05	4.70718e-05	-4.70417e-05	6.34476e-06	5.09106e-05	-6.81514e-05	3.36094e-05	-4.06864e-05	-8.48329e-05	2.06522e-05	-9.37685e-05	-1.45394e-05	-3.3321e-05	-9.33722e-06	8.85249e-05	-4.5832e-05	4.93445e-05	-3.15208e-05	1.06648e-05	-3.78708e-05	6.30986e-05	4.83604e-05	5.33887e-05	0.000114972	2.93378e-05	0.000308822	0.00135	0.00232	0.00315	0.00336	0.00323	0.00281	0.00241	0.00222	0.00128	0.000770948
770.941	5.42377e-05	-1.29829e-07	-6.35465e-05	5.56517e-05	1.94594e-05	7.96415e-05	-7.89505e-05	3.03927e-05	-2.77209e-05	-3.46688e-05	6.8922e-05	2.76382e-05	-3.11608e-05	-6.66038e-05	-3.3162e-05	1.72813e-05	1.48855e-05	-3.3534e-05	9.7225e-05	0.000145055	7.34769e-05	1.33122e-05	0.000115374	0.000107	0.000104008	8.94611e-05	2.28407e-06	-5.08353e-06	-3.85817e-05	-4.73354e-05	1.03514e-05	-3.15734e-05	5.52917e-05	6.94253e-05	0.000155392	5.94721e-05	-6.65693e-06	0.000128459	0.000226344	0.00136	0.00226	0.00281	0.00307	0.00316	0.00259	0.00223	0.00217	0.00144	0.000844572
772.142	-4.81928e-05	-4.53667e-05	-2.73181e-05	5.89819e-06	5.48556e-05	0.000144235	-2.06215e-05	3.68676e-06	-3.22628e-05	-6.30557e-05	1.595e-05	-7.24895e-05	4.25878e-08	4.35457e-05	4.10934e-05	0.000122599	0.000129858	8.02663e-05	8.48042e-05	6.40268e-05	2.68794e-05	3.0939e-06	0.000183298	6.10934e-05	0.000132091	0.000101128	0.000109538	0.000131324	8.14496e-05	9.34319e-05	5.62907e-05	-1.93288e-06	2.35533e-05	5.29057e-07	9.12744e-05	8.16578e-05	-2.3854e-05	3.11352e-05	0.000275519	0.00121	0.00218	0.00294	0.00323	0.00295	0.0027	0.00236	0.00224	0.00147	0.000959267
773.343	-0.000212357	0.000111691	-3.66267e-05	7.99441e-06	0.000128537	-1.02497e-05	3.72409e-05	1.96662e-05	2.2696e-05	-2.16828e-05	8.4014e-05	-0.000123192	-5.56519e-05	8.15931e-05	-3.3672e-05	0.000181929	-8.06676e-05	0.000118972	4.763e-05	-3.2793e-06	0.000105579	1.13805e-05	0.000226933	4.51416e-05	9.46436e-05	-2.19878e-05	6.46635e-05	1.16668e-05	3.02186e-05	-2.97034e-05	0.000101884	-1.6062e-05	9.88315e-06	4.58048e-05	7.41403e-05	0.000106813	-8.26887e-05	0.000111999	0.000285193	0.00123	0.00242	0.003	0.00304	0.00291	0.00264	0.00238	0.00217	0.00159	0.0011
774.544	9.29572e-05	1.73325e-05	-0.000118263	-8.87034e-05	-6.06e-05	1.06359e-05	3.92889e-05	5.3554e-05	3.02437e-06	-8.37299e-05	0.000177223	-5.3616e-05	-4.68987e-05	-2.80487e-06	6.06e-05	0.000152931	-0.00011892	0.000101423	2.35502e-05	0.000116023	-0.000150208	1.50255e-05	9.5253e-05	0.00011156	2.54645e-05	-2.31339e-06	-5.54344e-05	-2.9058e-06	-5.27386e-05	-0.000100722	-4.57201e-05	3.91459e-05	-8.93624e-05	-5.35174e-05	0.000155171	6.20652e-05	7.54631e-05	0.000135918	0.000244041	0.00117	0.00232	0.00291	0.00304	0.00314	0.00267	0.00254	0.0022	0.00166	0.00121
775.745	-6.88414e-05	-1.19701e-05	-2.57809e-06	-9.00151e-05	4.66742e-05	-0.000105608	-3.51294e-05	-4.71458e-05	2.13373e-05	6.40604e-06	0.000146943	-1.17894e-05	8.81513e-06	0.000120719	2.21832e-05	-9.82084e-06	0.000181469	0.000179194	0.000141123	-6.88964e-05	-0.000113994	-5.99457e-05	9.38506e-05	2.30369e-05	2.39328e-05	-5.04306e-05	2.95891e-05	-0.000104024	-2.39974e-05	-0.000109876	-0.000174648	2.80777e-05	-9.93442e-05	-3.58928e-05	8.67327e-05	0.000208056	3.87536e-05	0.000150388	9.86973e-05	0.00105	0.00198	0.00266	0.00294	0.00298	0.00243	0.00238	0.00226	0.00168	0.00116
776.947	-0.000107163	2.59841e-05	-2.9921e-05	7.97329e-05	4.58104e-05	7.91524e-05	-0.000249441	-4.89565e-05	5.11434e-05	-2.93673e-05	4.53316e-05	-0.000141643	-8.55396e-05	0.000141256	0.00022362	-9.74509e-05	0.000154044	0.000138944	0.000142889	8.14629e-05	7.77322e-05	-3.95529e-05	9.08954e-05	-3.22705e-05	0.000133174	0.000138237	0.000101473	2.75826e-05	-3.08214e-05	-3.24183e-05	-2.05369e-05	8.47916e-05	8.55949e-05	0.000130002	4.15953e-05	0.000156693	0.000133232	0.000157165	0.000254787	0.000911003	0.00168	0.00227	0.00255	0.00245	0.0021	0.00218	0.00194	0.00165	0.00132
778.148	-8.62751e-05	6.55331e-05	-0.000112629	3.57162e-05	5.0884e-05	6.47563e-05	-5.05102e-05	3.01008e-05	8.81822e-05	-4.43337e-05	-2.22582e-05	-3.62071e-05	-0.000114255	9.11758e-05	4.01205e-05	5.42763e-05	0.000196534	0.000226801	6.09886e-05	0.000150638	-9.39758e-05	0.000128013	1.01989e-05	6.00981e-05	8.8634e-05	5.78231e-05	-5.77571e-06	3.58415e-05	-6.271e-05	0.000128568	0.000165793	4.47807e-06	7.14411e-05	0.000221164	5.90186e-05	0.000175046	6.19452e-05	0.000110463	0.000139603	0.000689318	0.00159	0.00211	0.00224	0.0022	0.00186	0.002	0.00177	0.00148	0.00119
779.35	3.42631e-05	-5.87007e-05	-0.000106346	-0.000102589	3.77038e-05	6.19452e-05	7.33389e-05	-2.32695e-05	-1.13071e-05	-3.6481e-05	0.000174945	-8.54755e-05	-2.14856e-05	2.70274e-05	3.64323e-05	-9.08661e-06	0.000110559	0.000246845	0.000110175	4.44063e-05	2.51085e-05	-1.06643e-05	0.000153266	-1.82953e-05	2.26634e-05	2.47295e-05	0.000161244	8.26859e-05	6.77828e-05	0.000163381	0.000146543	-4.58929e-05	-0.000169488	5.88327e-05	0.000198512	7.37519e-05	3.20605e-05	0.000238821	6.94289e-05	0.000702504	0.00162	0.00203	0.00221	0.00207	0.00191	0.00174	0.00158	0.00128	0.00103
780.552	-0.000143916	-0.000130083	-0.000102405	-0.000107161	-0.000110401	0.000149986	0.000111723	0.000141241	-4.10621e-06	-0.000113521	5.5006e-05	0.000123523	-0.000201889	0.000208214	0.000123789	4.07627e-05	-1.49878e-05	0.000238094	8.93258e-05	4.85883e-05	5.50005e-05	0.000308458	8.89263e-06	4.81409e-05	0.000229163	-7.00933e-05	0.000130289	9.0416e-05	4.05688e-05	9.72672e-05	0.000238011	8.26156e-05	0.000190525	0.000109661	-3.86357e-05	-9.3139e-06	-6.10124e-05	0.000170218	1.71352e-05	0.000639764	0.00147	0.00202	0.00213	0.00207	0.00186	0.0018	0.00174	0.0015	0.00105
781.754	-0.000156405	0.000101017	-0.000133112	6.44565e-05	1.78857e-05	3.35928e-05	-0.000148665	8.75314e-05	3.98908e-05	-1.40352e-05	9.9172e-05	-4.45004e-06	-3.47559e-05	6.45373e-05	-1.66604e-05	-6.87344e-05	-1.83866e-05	0.000160151	-1.77434e-05	-5.95057e-05	0.000103373	8.54307e-05	0.000107594	0.000130163	0.00011995	0.000105336	-2.72143e-05	-5.03107e-05	2.63392e-05	-3.95675e-05	9.92609e-05	-6.94043e-05	4.27034e-05	9.11424e-05	-2.31631e-05	8.68505e-05	-0.000135175	7.60658e-05	0.000257921	0.000728905	0.00142	0.00179	0.00176	0.00183	0.00191	0.00189	0.00179	0.00159	0.00131
782.956	-4.99187e-05	-2.48955e-05	-0.000136164	3.95632e-05	9.92109e-05	7.75953e-06	-0.000103567	3.89259e-06	-3.1689e-05	-9.38728e-05	0.000129243	6.44862e-05	5.33269e-05	0.000123511	-8.08865e-05	-8.86967e-05	2.31638e-06	-1.01489e-05	2.80266e-05	-4.85182e-06	0.000190936	5.81905e-05	0.000238252	0.000164365	0.000183303	7.40656e-05	9.6986e-05	-1.71947e-05	0.000149232	5.33658e-05	-2.28967e-05	0.000110908	-5.21226e-05	0.000305871	0.000287216	0.000315442	0.000262106	0.000465056	0.000707976	0.000991121	0.00152	0.00188	0.00202	0.00212	0.00207	0.0023	0.00204	0.0019	0.00165
784.158	-2.24503e-05	2.41417e-05	-0.000118623	-2.78307e-05	8.96958e-05	3.71595e-05	-8.35091e-05	4.48441e-06	-5.14676e-07	-7.37098e-05	0.000110224	2.51865e-05	-5.04408e-05	0.0001316	-4.54147e-05	-5.94553e-06	-9.86421e-05	5.71189e-05	6.32921e-05	6.51189e-05	0.000120166	0.000122852	0.000157309	0.00016285	0.000131995	0.000103302	0.000150969	7.28127e-05	8.89108e-05	7.00735e-05	0.000109425	0.000143	0.000131372	0.000259193	0.000330657	0.000358113	0.000395673	0.000699409	0.000831691	0.00111	0.00158	0.0019	0.00219	0.0022	0.00225	0.00236	0.0022	0.00198	0.00162
785.36	1.33897e-06	1.68632e-05	-0.0001339	5.54476e-06	-1.39046e-05	9.11908e-05	-0.000111481	-0.00010511	5.20699e-05	-5.46145e-05	7.87051e-05	2.66709e-05	1.91744e-05	0.000102681	2.47709e-05	-7.17099e-05	2.06556e-05	-5.1993e-05	1.61107e-05	4.47283e-05	0.00017869	0.000160462	0.000142096	0.000156058	0.00017868	0.000166636	0.000162111	0.000108912	0.000183163	0.000164865	0.000134025	0.000172394	0.000286139	0.000419381	0.000423608	0.000496637	0.000447167	0.000933806	0.00108	0.00125	0.00184	0.00222	0.00236	0.0023	0.0025	0.00242	0.00216	0.00191	0.00166
786.563	-0.000129225	1.61503e-06	-7.68596e-05	-9.88944e-05	-6.20398e-05	-3.61602e-05	-6.68142e-05	2.13155e-05	0.000113148	-1.07784e-05	-2.67025e-05	0.000158811	4.14816e-05	0.000206906	-3.58037e-05	-3.90291e-05	7.74973e-05	1.44642e-05	5.5678e-05	0.00012186	0.000317198	3.96262e-05	0.000132759	0.000114238	0.000231016	0.000139884	0.000169337	3.9142e-05	0.000162335	0.00016791	6.2346e-05	0.000262411	0.000360111	0.000368557	0.000303838	0.00047684	0.000573347	0.00088372	0.00105	0.00115	0.00192	0.00232	0.00232	0.0023	0.00252	0.00252	0.00203	0.00198	0.00165
787.766	0.000121843	9.88005e-06	-0.000146744	1.0993e-05	-0.000210379	4.14488e-05	-0.000132626	3.76623e-05	0.000175674	0.00020439	-6.29347e-06	-6.85659e-05	7.54915e-06	9.62132e-05	-0.000141045	0.000107637	0.000115539	4.93217e-05	0.000131616	-5.74813e-05	0.000159924	-6.34476e-05	3.62208e-05	0.000174124	-5.22557e-05	-7.36363e-05	-0.000133777	7.12966e-05	4.37985e-06	-1.5224e-05	-2.17008e-05	8.59394e-05	-6.51276e-06	0.000217129	-3.43999e-05	0.000399392	0.000107303	0.000336785	0.000311433	0.000587763	0.00126	0.00174	0.00177	0.0018	0.00171	0.00167	0.00134	0.00114	0.00114
788.968	-9.33099e-05	0.000179386	-0.000190106	-0.000212467	-2.43041e-05	9.0383e-05	1.26147e-05	5.02773e-05	0.000231109	7.75226e-05	-8.12801e-05	7.87778e-05	2.64331e-08	-1.69511e-05	-0.000101679	0.000182208	-6.23261e-05	0.000243497	-2.00743e-05	-0.000158043	0.000169153	0.000186115	0.000167607	-1.02516e-05	0.000207373	-1.7542e-05	0.000136945	-0.00012007	1.09176e-05	0.000132185	0.000139403	0.000314831	0.000246143	1.21174e-05	0.000236626	5.2441e-05	0.00013914	0.000102152	9.83107e-07	0.000312286	0.000731939	0.00138	0.0013	0.00134	0.0011	0.00129	0.000888438	0.000852462	0.000999281
790.171	-0.000123596	-9.42528e-05	-0.000174284	-0.000103872	1.06216e-05	5.95189e-05	-1.99727e-05	1.41454e-05	0.000206499	-2.69224e-05	-4.96978e-05	1.46731e-05	9.54501e-05	0.000247858	-5.61696e-05	-0.000449851	-9.6305e-05	0.000277512	-0.000142534	-0.000315189	-0.000220579	6.39773e-05	-9.17185e-05	-0.000226005	0.000157208	-9.38896e-05	-0.000106549	-0.000180358	0.000189183	0.000437691	0.000113262	0.000583626	0.000287426	5.83312e-05	0.000137609	0.000378934	0.000301711	0.000431124	6.86445e-06	0.000234286	0.00118	0.00145	0.00145	0.00117	0.00112	0.00121	0.00107	0.00106	0.00112
791.374	0.00017774	-0.000274009	-0.000292726	-0.000159963	-0.000139709	0.000380626	0.000244212	0.000311564	0.000276657	-0.000183888	-4.54226e-05	-0.000187216	0.0001151	5.90983e-05	-0.000282064	0.000147886	9.4284e-05	0.000331791	-3.76124e-05	-0.00012874	-0.000286128	-0.00033995	0.000190454	-9.9914e-05	-0.000104005	-0.000241832	-0.000113502	0.00013724	-6.24506e-05	6.3523e-05	0.000105817	0.000323863	0.000442935	0.000404275	0.000389022	0.000533081	0.000297448	0.000511919	0.000292736	0.000520714	0.000955499	0.00151	0.00169	0.00136	0.00141	0.00133	0.00137	0.00146	0.00149
792.577	-0.000271093	0.000126688	-0.000386562	-0.000184967	0.000217208	0.000123492	-7.02237e-05	-4.09854e-05	8.39362e-05	9.44273e-05	-0.000149043	0.000137065	-6.16109e-05	0.00041713	-3.54611e-05	0.00018319	0.000324115	0.000156683	0.000190916	0.000262186	-0.000183156	-9.2866e-05	0.000114092	0.000229591	0.00030063	0.000290799	0.000269099	0.000137625	0.000441522	0.000246557	0.000215573	0.000397751	0.000434449	0.000239084	0.000677188	0.000628319	0.000319276	0.000851014	0.000427459	0.00104	0.00125	0.00169	0.00191	0.00155	0.00114	0.00147	0.0014	0.00134	0.00153
793.781	4.01959e-05	0.000175283	-0.000128124	-0.000271147	1.25921e-05	0.000289801	0.000121967	-0.000141516	5.80887e-05	0.000143822	4.84522e-06	0.000144741	5.44074e-07	-0.000222394	-0.0002287	1.71945e-05	0.000386663	0.000363564	-0.000222371	8.15161e-05	-0.000369628	0.000147701	0.000181682	-0.000157803	0.000120458	0.000129317	0.000341798	-3.03443e-05	0.000438771	0.000304056	0.000592776	0.000443671	0.000435692	0.000290873	0.000538729	0.000306514	0.000195709	0.000554602	0.000528268	0.000635085	0.000927316	0.00147	0.00149	0.00157	0.00155	0.00117	0.00133	0.00146	0.00132
794.984	-0.000271391	0.000153661	0.000139903	-0.000169517	0.000128306	0.000150242	0.000106177	-0.000327281	0.000116122	7.33875e-05	0.000124311	-0.000250449	-0.000130715	0.00019884	-4.15991e-05	-9.96553e-05	0.000184301	0.000321401	-0.0001867	0.000187686	-0.000146286	-4.82557e-05	-3.00278e-05	-2.59213e-06	-0.00035947	-0.000146198	4.66106e-06	-7.24154e-05	-0.000197058	5.33949e-06	0.000212726	-4.76937e-05	2.69216e-05	-2.65552e-05	-4.05912e-05	-2.25656e-05	-0.000533075	0.000165125	-1.16744e-05	0.000291666	0.00073573	0.00103	0.000580032	0.00123	0.000961542	0.000739322	0.000913653	0.00107	0.00106
796.188	-6.54148e-05	9.10691e-06	-0.000153262	-0.000446919	-8.53577e-05	-0.000260861	9.52765e-06	0.000127392	0.000260068	0.000269742	0.000369723	-4.25136e-05	-6.05899e-05	0.000268584	-0.000199227	6.29986e-05	3.75857e-05	1.66715e-05	-0.000295327	-0.000154082	-0.000437095	9.99021e-05	0.000159053	0.000315124	-7.06939e-05	-7.10383e-05	-9.46755e-05	-0.000120044	-0.000162774	-0.000178448	-0.000275784	0.00011367	-0.000281199	-0.000204981	0.000240608	-0.000185948	6.42106e-05	0.000295107	-0.000100115	0.000168134	0.000262552	0.000548957	0.000811155	0.000936254	0.000769664	0.000521237	0.000729845	0.000701187	0.000865771
797.392	0.000249945	-4.33648e-06	-0.000197024	-0.000107152	-1.72306e-05	-0.000199509	-0.000158851	0.000107271	9.6801e-05	-0.000272389	-7.10225e-05	0.00020845	-2.36129e-05	0.000319247	6.94133e-05	-0.000122037	0.000106833	-0.000258413	-0.000103103	-0.000104489	-0.000281198	-8.27601e-05	0.000330098	-0.000183748	0.000339928	-0.00031587	-0.000216122	0.000125126	-0.000242288	-0.000267162	-4.03835e-05	3.16557e-05	-0.000255933	-0.000162417	0.000150883	0.0001701	-0.000191205	0.000129548	0.000147668	-2.47698e-05	0.000408104	0.000649081	0.000633684	0.00115	0.000760542	0.000805878	0.000607613	0.000905921	0.000509488
798.595	7.52286e-05	0.000202678	-0.000161261	-0.000243853	0.000313988	-0.000301102	-5.7001e-06	0.00011374	6.64665e-05	8.70954e-05	-1.31109e-05	0.000320035	-0.000115709	-9.99643e-05	-0.000238531	-3.83718e-05	0.000339555	-0.000145132	-5.86129e-05	2.55905e-05	-0.000270395	3.35136e-05	-0.000184254	0.000207206	1.71509e-05	-0.000216956	0.000298359	0.000285748	-8.64948e-05	-7.24956e-05	-1.31152e-05	8.83668e-05	-0.000331536	-0.000235384	-9.22728e-05	-0.000118006	-0.000531514	2.48738e-05	8.133e-05	9.96819e-06	0.000347047	0.000629295	0.000743513	0.000818403	0.000607728	0.000865217	0.000428402	0.000942772	0.000522466
799.799	-0.000183685	3.43368e-05	-0.000469552	-2.3723e-05	0.000182644	-0.000305342	8.15172e-05	-0.000114581	0.00016273	-1.00206e-05	0.000204685	0.000475658	1.35789e-05	0.000142108	-0.000190354	-0.000194491	0.000312604	0.000312241	0.000138651	0.000421078	0.000156463	0.000299266	9.02667e-05	-0.000171027	0.000540017	-0.000510314	0.000152809	-0.000103008	7.54992e-06	0.000546367	0.000139709	0.000618647	1.93118e-05	-0.000479412	-9.44445e-05	0.000114336	0.000274861	0.000267125	7.29786e-05	0.00018775	0.000742402	0.000773498	0.000569629	0.000959111	0.000447434	0.00115	0.00071864	0.000836719	0.000600446
801.004	-0.000111841	-0.000104863	-0.000105283	0.000156068	-0.000335154	0.000123477	4.16048e-05	-5.80743e-06	0.000201831	8.57614e-05	5.92764e-06	0.000225014	-0.000108227	0.000219817	-0.000288327	0.000279775	-3.38821e-05	0.000120823	0.000157511	-9.18015e-05	0.000216214	-0.000326599	0.000109677	0.000406254	0.000240061	2.55539e-05	0.000145424	4.32282e-05	3.81952e-05	0.000375414	-0.000176271	0.000270627	0.000366314	0.000146766	-0.000150384	-0.000290969	-0.000582655	0.000414367	-0.000203377	-1.17785e-05	4.60969e-05	0.000301028	0.000968163	0.00108	0.00052421	0.00101	0.000659057	0.000684853	0.000740979
802.208	0.000268588	0.000176062	0.000434217	-9.17131e-05	0.000212599	-0.000223253	0.000438816	-0.000298266	-9.46788e-05	-0.000399012	4.46636e-05	-0.000127197	-0.000495053	0.000158004	-3.77672e-06	-2.17863e-05	-0.000167171	0.000232733	8.03168e-05	-9.66371e-05	-4.59375e-05	0.000344865	-8.52745e-05	-0.000226803	0.000502328	-0.000265212	-7.77643e-05	-0.000243924	-0.000388712	-0.00012294	-0.000501513	0.000440327	-0.000654359	0.000487885	-3.40632e-05	-0.00037693	-0.000251728	0.000244422	-0.00024862	-3.90979e-05	-0.000149843	0.000602982	0.000895915	0.00144	0.000780526	0.000721054	0.000494955	0.00106	0.000420203
803.412	-3.64722e-05	-0.000453185	0.000139938	-0.000178199	0.000541687	0.00015433	0.000250647	-0.000556477	0.000210642	-8.46657e-05	1.5545e-06	-1.42974e-05	-0.000237449	4.81371e-05	0.00021381	0.000118629	0.000733456	0.000305339	-0.000508706	-0.000456456	0.000395194	-0.000426735	-0.000355645	-4.55932e-05	-0.000428737	0.000137868	4.47575e-05	-0.000347402	-6.0998e-05	-6.89075e-05	0.000159596	0.00018696	-3.641e-06	3.47612e-05	-1.74703e-05	-0.000266897	-0.000429155	0.000364975	0.000210327	-0.000325845	-0.000223775	0.00103	0.000662542	0.000975259	0.00141	0.00053291	0.000894256	0.000526556	0.00122
804.617	-0.000127722	-0.00044566	-7.05944e-05	-1.52745e-05	0.000400763	0.000116766	4.81083e-05	-6.85271e-05	0.000199889	-0.000333541	0.00017238	-6.839e-05	-0.000519954	0.000517163	0.000194595	-0.000183773	0.000246366	0.000285759	0.000113418	8.93394e-05	-8.06489e-05	-1.45808e-05	-0.000239311	0.000296703	0.000690981	0.000188471	0.000222594	0.000626504	0.000288677	0.000209826	-2.38942e-05	0.000171909	-3.21606e-05	0.000165261	0.000221402	-0.000325671	0.000569521	4.68763e-05	-0.000546317	-5.86133e-05	0.000544006	0.000803189	0.00047364	0.000455797	0.000964359	0.000627856	0.00115	0.000592959	0.000784388
805.822	-0.000174865	-0.000124988	-0.00013321	-1.08093e-05	0.000122324	-0.000258558	-7.64405e-05	7.3017e-06	0.000175886	-8.58703e-05	-0.000489055	0.000127097	0.000139392	0.00035606	0.000425737	0.000264406	4.71326e-06	0.000650698	0.000104282	0.000136301	-0.000338272	0.000512406	0.000371804	-5.24323e-07	0.00044414	-0.000149337	0.000416122	2.00018e-05	-9.31767e-05	0.000129806	0.000506232	0.000391594	-0.000389573	-0.000244535	7.15813e-05	-0.000485206	-0.000223148	4.07417e-05	0.000267816	-0.000545968	0.000828378	0.000839461	0.000571151	0.000889084	0.000405662	0.000958605	0.000659571	0.000914988	0.00070018
807.026	0.000251449	-0.000197659	3.26011e-05	0.000335867	0.000135567	-0.000590839	0.000357421	-7.16113e-05	0.000149108	-0.000390074	-0.000173293	-6.08166e-05	0.000326759	0.000247581	-0.000352059	0.000379067	0.000507847	0.000484169	5.71304e-05	0.000679898	-0.00020678	-0.000596745	0.000925861	0.000162902	0.000166518	0.000354068	0.000492807	2.34562e-05	0.000175623	0.000848491	0.000215133	0.00112	-0.000115865	-0.00023146	0.000432733	7.93519e-05	0.000485707	0.00033319	0.000116494	0.000694721	0.000691016	0.00105	0.00104	0.0005723	9.54823e-05	0.000457699	0.00136	0.0016	0.00124
808.231	0.000207922	-0.00104	-0.000506041	0.00020604	0.000397556	-0.000206262	-6.9856e-05	0.000911316	-0.000258582	-0.000284029	0.000836186	-0.000706568	0.000460988	-8.3491e-05	0.000138359	-3.31561e-05	0.000207625	0.00116	-0.000165991	0.000297829	0.000507287	0.000123801	-0.000502377	-0.000530193	0.000889393	-7.66165e-05	0.000274324	-0.000287799	-0.000354314	0.000567473	-0.000443062	4.2121e-05	-0.000317209	0.000407894	0.000935511	0.000959328	0.000134273	-0.000333881	9.88016e-05	-3.96627e-05	-3.18688e-05	0.000422905	0.00218	-1.13419e-05	-0.000139423	0.000387474	0.000577125	0.00194	0.000981976
809.436	-0.000859068	-0.00122	0.00104	0.000143822	-5.848e-05	-8.99881e-05	0.000640825	-0.000256315	-0.000512712	-0.000347961	0.000350436	0.000410244	0.000795927	0.000266624	-0.000303795	0.00010652	-0.000376031	-0.000414912	-0.00111	0.000197112	0.00194	0.000872275	-0.000545402	-0.000882351	-5.42049e-05	-0.00131	0.000116748	-0.000627573	0.000292786	-0.000477268	-0.000125266	0.000298918	-0.0012	0.00101	0.000763405	-8.03118e-05	0.000927901	0.000154636	5.74743e-05	0.000257835	-0.000483558	0.000958791	0.000943125	-0.000612087	-7.5163e-05	0.00118	0.000481322	-0.000548492	0.000589003
810.642	0.000572636	-0.000358023	0.000302831	-0.000172098	3.86192e-06	-0.000367955	0.000747499	0.000388221	0.000378869	-7.0085e-05	0.000316978	-0.000523848	-0.000429126	-0.000595276	-0.000194482	0.000447153	-0.00149	-0.000271431	0.000421104	-0.000355576	-0.000745519	0.000370089	-0.000631837	0.000869117	-0.00119	-0.000799987	0.000766701	-0.000177855	-0.000596571	0.000441482	-0.00115	0.00061893	-0.000597595	0.000430345	0.000142726	-0.000891203	-7.30393e-05	-0.000204721	-0.000369732	-0.000158894	0.000864915	0.00087961	0.000952498	0.00108	0.000180357	-1.095e-05	0.000311045	0.000718248	-0.000211633
811.847	-0.000983886	-0.00111	-3.52375e-05	-0.000150047	0.00115	0.000794425	-0.000249093	0.000443819	0.000928541	-0.000635447	1.73609e-05	7.67789e-05	0.00131	-0.000370504	-0.00118	0.00142	0.000154904	0.00194	-0.00103	-0.00243	0.000151527	0.00032874	0.000454368	-0.000507426	-0.00132	-0.00165	0.000180877	-0.000158235	0.00073118	-0.000224723	-0.00244	0.00198	-0.000470537	-9.09864e-05	0.00134	0.000736838	0.00079933	0.000405323	-0.000699742	-0.000579003	0.000698659	0.00139	0.00283	0.000899008	0.00106	0.00142	-0.000796587	0.000168011	0.00126
813.053	-0.00114	0.000511355	-0.000745751	0.000355224	0.00122	0.000526534	0.00108	-0.00024281	0.000372629	-0.00314	0.00112	-0.000222786	-0.00189	0.00096767	0.00123	0.000413162	0.00085932	0.00265	0.00117	-0.000793555	-0.00126	-0.0004069	0.00136	-0.00164	0.00183	-0.00053221	-0.000516537	0.000911739	-0.00088873	0.00161	0.00101	-0.000645383	8.50215e-05	-0.000276487	0.00184	-0.00182	0.00079821	-0.00154	-0.00239	0.000142624	0.000396572	0.00176	0.000125549	0.00152	-0.000667395	-0.000688066	-0.00124	0.000825688	0.00183
814.258	-0.000295668	0.00102	-0.00198	7.86502e-05	-0.000656721	0.00175	-0.000905865	0.000121961	0.000141229	-0.000777474	0.000340419	0.000617808	-0.000463154	0.00115	-0.000137408	-0.000908809	-0.000501475	0.00258	6.39347e-05	-0.00162	-0.00115	-0.000434594	-0.000591688	-0.00128	-0.00147	0.000162791	0.000346344	-0.000206171	-0.000140935	-7.34537e-05	0.000884935	-0.00228	-0.00255	0.000651851	0.000870697	-0.00198	0.000249977	-0.000502078	-9.59847e-05	0.00282	0.00274	0.00148	3.53269e-05	-0.000423419	-0.00157	-0.0016	-0.000774356	7.51765e-05	-4.5576e-05
815.464	-0.00092599	-0.00244	-0.00116	2.87888e-06	0.000577786	0.000282705	0.0014	0.00182	0.00172	0.00183	-0.00078365	-0.00202	0.000814054	0.000990681	-0.00211	0.00123	0.00129	0.00313	-0.00155	0.000669806	-0.000758149	-0.00018714	-0.000649758	-0.00157	0.00219	-0.00243	0.000167192	0.000337748	-0.00117	0.00271	-0.000633384	0.00121	0.00105	0.00153	0.000574696	0.00134	0.00115	0.000652323	-0.0011	-0.000866659	-0.000943525	0.00183	0.00285	-0.00131	0.000614409	0.000479292	-0.00152	0.00149	1.69537e-05
816.67	-0.000991553	0.00103	-0.00128	-0.000778709	0.00206	-0.00133	0.00159	-0.000628161	0.00166	-0.00178	0.000531226	0.000248994	-0.000615605	0.000349447	-7.31635e-05	-0.000326135	0.00201	-0.000618613	-0.0012	-0.000242603	-0.000393997	0.00163	-0.0016	-0.00104	0.00116	-0.000586796	-0.000242123	-0.00139	-0.000330201	0.00121	-0.000425786	0.000631655	0.00195	-0.000705091	0.00112	0.00123	0.000551125	-0.000407454	-0.000320065	0.00124	-0.000328185	0.000114911	0.00149	-0.00163	-0.00136	0.000707761	-0.00149	-0.00205	-0.000243118
817.876	-0.00086015	0.0014	-0.00169	0.000760874	-4.00431e-05	0.000247648	0.00292	-0.000599269	0.000871831	-0.00136	-0.00069681	-0.000115204	-0.00191	0.0016	-0.000533604	-0.000440776	0.000502537	-0.000203603	-0.00244	8.29174e-05	-0.00249	-0.00246	-0.00151	-0.00144	-0.00122	0.00112	0.00515	-0.00198	-0.00107	0.00215	-0.00011466	0.000185306	-0.000207494	-0.000289286	-4.09454e-06	-0.000572898	-0.000170475	-0.000263549	-0.00262	-0.000422887	0.00167	-0.00121	0.000896838	0.000144656	0.000908723	0.00156	-0.00154	0.00104	0.00162
819.082	-0.00331	0.00164	-0.000389562	0.00226	-0.00248	-0.000775052	0.00177	0.00175	0.00216	-0.00165	-0.000224702	0.000957767	-0.00103	0.00103	-0.0017	0.00169	0.00113	0.000879496	-0.00255	0.000357583	0.000920117	0.00058809	0.00162	-0.00149	-0.000431645	0.00169	6.02458e-05	0.00174	-0.00118	-0.000607052	-0.00174	0.000655393	0.00411	-0.000716568	0.00271	0.000674844	0.000645188	0.00183	-0.000140857	0.000958938	0.00199	-0.00124	0.00217	0.00133	-0.00245	0.00102	-0.00235	0.00382	0.00422
[truncated: 151 more columns]

## Sheet: Fig.2D-Biaslight
0	-2.00667	-1.892	-1.792	-1.69201	-1.59201	-1.49199	-1.392	-1.292	-1.19066	-1.09066	-0.99066	-0.89199	-0.79067	-0.69068	-0.59066	-0.49066	-0.39066	-0.29199	-0.19067	-0.09067	0.00932	0.02799	0.048	0.07201	0.09467	0.12	0.14533	0.17333	0.20268	0.23467	0.26534	0.3	0.33601	0.37467	0.41467	0.45735	0.50266	0.54933	0.59867	0.652	0.708	0.76667	0.82933	0.89466	0.96401	1.03601	1.112	1.19333	1.27867
599.434	3.24751e-05	-0.000114529	0.00018594	4.26542e-05	6.95237e-05	-5.8864e-05	-0.00011507	0.000166578	0.000276149	-0.000100942	-0.00022099	-0.000205865	9.011e-05	-3.14328e-05	-1.57364e-05	5.19565e-05	8.86616e-05	-0.000171468	3.94428e-05	0.000147131	-7.67669e-06	0.000147983	0.00012657	4.38059e-05	0.000109571	0.000149202	9.36172e-06	-0.000137694	-1.14698e-05	5.95943e-05	6.59516e-05	0.000126307	-7.74832e-05	0.000291453	0.000101514	5.73978e-05	4.63996e-05	2.08445e-05	-0.000148721	-0.000142526	-0.000161186	0.000211835	0.0004892	0.000788701	0.00129	0.00138	0.00201	0.00205	0.00246
600.615	-2.09219e-05	-2.75021e-05	0.000121564	6.57617e-05	-0.000151309	-0.000101116	-5.13325e-05	8.30165e-05	0.000199001	-2.68163e-05	-0.000295422	-0.00015618	0.000139356	0.000227401	-5.49992e-06	0.000159626	-0.000103874	-2.35901e-05	0.000188712	-8.08965e-05	-6.36205e-05	0.000352152	3.02265e-05	0.000105699	-7.30293e-05	-4.11938e-05	1.61973e-05	-7.08643e-05	-5.47437e-05	-9.14988e-05	7.19914e-06	-0.00017817	-2.46437e-05	0.000159641	1.54942e-05	0.000109885	0.000244546	4.62219e-05	-0.000284989	-0.00010633	-0.000301835	0.000326995	0.000485842	0.00085148	0.00102	0.00131	0.00177	0.00188	0.00209
601.797	-5.98691e-05	0.000116242	0.000148572	-0.000137845	-3.74792e-06	-8.54372e-05	-7.42101e-05	9.6754e-05	-7.61492e-06	2.51906e-05	-3.10929e-05	-1.31181e-06	-0.00018168	0.000164259	3.17919e-05	0.000213855	0.000166521	-0.000145543	0.000372613	0.000104467	-5.3293e-05	0.000117358	5.17812e-06	-0.000126198	-0.000151009	0.000270729	-0.000107531	-8.12375e-05	-0.000112195	0.000257285	0.000117202	0.000147685	-0.000123466	0.000248724	-7.08051e-05	0.000118818	0.000230129	-0.000124957	-0.000283337	-8.2437e-05	-0.000266211	0.00030282	0.000439867	0.000830789	0.00102	0.00127	0.00176	0.00167	0.00223
602.978	-5.38391e-05	-0.0001278	0.000160523	-1.59841e-05	8.34577e-05	-0.000229068	-0.000323118	2.04382e-05	3.94575e-05	0.000177913	-7.89956e-05	3.3195e-05	0.000248678	7.61003e-05	-1.09586e-05	7.46303e-05	0.000104122	-0.000363974	1.29805e-05	-4.6288e-06	5.75633e-06	0.000107424	-3.06797e-05	4.88125e-06	-5.41187e-05	-0.000194757	-0.000123142	2.54251e-05	1.94812e-05	0.000117941	0.000173801	0.000165338	-3.61912e-05	0.000152056	-0.000183718	-1.41381e-05	3.14008e-05	-0.000170642	-0.000339569	-0.000306883	-0.000131974	-6.26507e-06	0.000321014	0.000838757	0.00126	0.0012	0.00161	0.00168	0.00208
604.16	-0.000262836	5.00771e-05	0.000213853	0.000145598	-0.000117311	-1.7996e-06	-0.000119673	0.000139632	6.75385e-05	0.00011322	-0.000352233	-4.43473e-05	-7.40534e-05	0.000354725	-0.00011239	0.000275422	0.000114863	2.83511e-05	5.99515e-05	-9.72356e-05	0.000100126	6.34622e-05	3.53797e-05	-0.000114226	-0.000256093	-5.03371e-05	0.000101637	6.32123e-05	-0.000269836	0.00027994	0.000148189	0.000222652	-0.000101278	0.000331505	2.94145e-05	0.00013913	0.000157079	-0.000323339	-0.000382868	-0.000366294	-0.000260067	-0.000232184	0.000495296	0.000772216	0.00113	0.00123	0.00165	0.002	0.00224
605.342	-5.81946e-05	-6.89968e-05	0.000300289	9.23762e-05	1.19735e-05	-7.06035e-05	-6.44556e-05	-6.34348e-05	0.000159023	0.000159121	-1.3424e-05	-0.000232573	-9.33454e-05	6.14814e-06	-6.39028e-05	0.000105735	-6.90541e-05	-3.94337e-05	-4.74392e-05	-0.000129181	1.53206e-05	-0.000133075	-0.000169637	-0.000204617	-0.000154449	-0.00016502	5.89861e-05	0.000142745	-5.61299e-05	0.000314275	0.000361126	1.87072e-05	-1.73409e-06	7.29472e-05	0.00011104	9.05547e-05	0.00012638	-0.000172887	-9.03079e-05	-0.000554248	-6.32863e-05	-0.00019557	0.000231508	0.000665034	0.00118	0.0013	0.00148	0.00189	0.00227
606.524	-0.000298349	0.000120571	1.40687e-05	-4.83875e-05	6.27118e-05	-7.26844e-05	0.000160181	-0.000124078	-0.000101321	2.72145e-05	0.000193913	-0.000192552	0.000146079	9.30235e-05	1.9609e-05	-0.000178766	-6.90823e-05	-0.000114499	-1.77466e-05	-7.41396e-05	-0.000231301	6.8721e-05	-5.88404e-05	8.49449e-05	-0.000208675	-2.69551e-05	0.000191582	0.000118248	-0.000283419	-2.04678e-05	-3.89689e-05	-6.0738e-05	-0.000137434	0.000118974	-1.14054e-05	-6.87597e-05	1.8584e-05	6.0663e-05	1.47247e-05	-0.000148231	-0.00042312	-7.76021e-05	0.000135975	0.000544036	0.000907071	0.00124	0.00162	0.00177	0.00227
607.706	1.90409e-05	4.46447e-05	-9.18538e-05	-4.69702e-07	7.49041e-05	-0.000137788	-2.91878e-05	3.95543e-05	2.93609e-05	1.17517e-06	9.42667e-05	-2.64191e-05	-0.000167532	7.62784e-05	7.4025e-05	-0.000146908	-1.2805e-05	-0.000166251	-3.67179e-06	5.271e-05	-0.000243148	6.08511e-05	-0.000166033	4.81687e-05	-0.000143725	5.30277e-07	-8.36171e-05	-3.11389e-05	7.54547e-05	4.06371e-05	5.77077e-05	1.44981e-05	-1.26163e-05	-0.000151522	5.42657e-05	-0.000103305	4.04279e-05	2.90469e-05	-0.000162916	-0.000582132	-0.000158093	-0.000154036	0.000361717	0.000504332	0.000847623	0.0012	0.00162	0.00183	0.00211
608.888	-2.38744e-05	-7.95376e-06	0.000106015	-0.000397959	0.000131226	-8.1683e-05	-4.95691e-05	-8.26027e-05	0.000118882	0.00010272	-4.51032e-05	2.68116e-05	-0.000112093	0.000129606	0.000185577	-8.04732e-05	0.00017383	-6.86338e-05	6.44213e-05	-9.74998e-05	-0.000311268	-3.80823e-05	-5.76183e-05	-6.61376e-06	-0.000133904	8.36136e-05	3.76078e-05	9.56468e-05	-6.59325e-05	8.87315e-05	4.84938e-05	-0.000139722	0.000127813	-0.0001187	2.91781e-05	-0.000174616	0.000166851	-0.000199995	-0.000543603	-0.000414392	-0.000326863	-8.10299e-05	0.000195586	0.000359503	0.000990451	0.00112	0.00137	0.00163	0.00209
610.071	5.68338e-05	6.13967e-05	1.17206e-05	-0.000143308	4.83834e-05	-0.000147641	-5.54136e-06	-0.000161969	-1.34454e-05	0.000268706	-9.72682e-06	8.30842e-05	3.9656e-05	0.000116931	-0.000205079	8.91873e-06	9.57877e-05	-6.27825e-05	-0.000118837	-0.000186914	-0.00021257	-4.65061e-05	9.77547e-05	0.000245155	-9.15243e-05	-4.02678e-05	-7.10166e-05	-2.09471e-05	0.000170606	0.000238346	6.29204e-05	-0.000132146	7.52997e-05	-0.000102725	-7.07959e-07	2.97512e-05	0.000152052	-0.000173679	-0.000355389	-0.000350327	-0.000307834	-0.000108523	0.000103497	0.000617433	0.00081966	0.00115	0.00157	0.00195	0.00213
611.253	5.20925e-05	3.69151e-05	6.69665e-05	0.000202802	-8.24039e-05	6.79285e-05	-2.31922e-05	-0.000104911	-7.03703e-05	0.000112369	-0.000194434	-0.000134155	-0.000229327	0.000168874	0.000130847	-0.000105681	0.000345088	-1.26363e-05	-1.9271e-05	-2.04861e-05	-0.000177249	0.000201464	0.000131149	5.22981e-05	2.0842e-05	4.3271e-05	7.40735e-05	7.82118e-05	4.9735e-05	-6.4345e-05	-3.42416e-05	-4.97265e-05	0.000187577	0.0001185	-4.28834e-05	-1.56992e-05	0.000145331	-0.00019521	-0.0003371	-0.000421788	-0.000490218	-0.00013566	0.000130347	0.000402919	0.00081237	0.0012	0.00135	0.00181	0.00198
612.436	4.5002e-05	-9.24824e-05	-8.46719e-05	0.000316894	4.5578e-05	-6.13826e-05	7.12584e-05	3.64155e-05	-0.00014193	5.3692e-05	-3.29535e-05	-4.42965e-05	-2.07924e-05	-4.66772e-05	-4.36541e-05	-0.000111318	-2.40654e-05	-4.9699e-05	5.19682e-05	-8.11577e-05	0.000184056	7.2284e-05	0.000245971	-2.97712e-05	-0.000188944	-9.71238e-05	4.27799e-05	1.73868e-05	-0.000286882	-5.28837e-06	-0.000174092	7.07741e-05	4.45632e-05	0.000175074	-6.84016e-05	0.000168122	0.000103988	6.95028e-05	-0.000285196	-0.000362801	-0.000323954	-0.000363481	0.000321467	0.00024535	0.000910608	0.000935731	0.00141	0.00185	0.002
613.619	-3.14914e-05	-6.06424e-05	0.00017241	8.62496e-06	-0.000109041	-4.28696e-05	7.83821e-05	0.000231224	6.35079e-05	2.4689e-05	-5.08153e-05	-4.56918e-05	-0.00012471	4.4076e-05	-0.000157654	6.53908e-05	-6.33608e-05	4.24614e-05	0.000170148	0.000224738	-4.10172e-05	0.000137541	0.000224217	-6.27137e-06	-0.000100491	0.000216764	8.74386e-05	-0.000154854	-0.000175029	-0.00020006	4.89809e-05	-0.000163874	-6.84947e-05	-2.9546e-05	4.21167e-05	7.85293e-05	0.00039437	-0.000219865	-0.000353003	-0.000545995	-0.000202451	-0.000263261	5.14655e-05	0.000205061	0.00079024	0.00104	0.00122	0.00174	0.0019
614.802	-1.22347e-05	-0.000106337	8.76413e-06	0.000217883	4.21854e-05	-5.3286e-05	-0.00021383	-1.16331e-05	0.00015793	0.000151033	-8.69206e-05	-1.92981e-05	-4.50903e-05	-0.000193571	0.000164405	0.000142986	-1.87982e-05	7.28296e-05	8.05259e-05	-7.57602e-06	-7.39693e-05	0.000299141	-5.25878e-05	-4.2074e-05	0.000103666	6.58928e-05	-7.49219e-05	0.000110618	2.49411e-05	0.000145756	0.000109382	0.000280252	0.000292578	7.33906e-05	-1.44111e-05	0.000150094	0.000103741	-9.508e-05	-0.000409983	-0.000606221	-0.000214369	-0.00027087	-6.42337e-05	0.000367254	0.000666237	0.000889423	0.00119	0.00182	0.00199
615.985	-0.000119611	9.19141e-05	-9.8332e-06	-8.80043e-05	0.000172242	-0.000243563	-0.000103087	7.73807e-05	0.00018398	0.000112544	3.03013e-05	6.23066e-05	-9.37161e-05	-0.000191821	0.000118966	0.000134258	-1.4337e-05	0.000382308	8.6035e-05	-7.8574e-05	9.35132e-05	0.000269857	-0.000158202	1.63192e-05	-1.68626e-06	7.93637e-05	-0.000125054	6.38844e-05	-0.000107328	-0.000247995	0.000101927	4.60741e-05	0.000116468	-0.000193039	-6.29304e-05	0.000157911	0.000119833	-1.23466e-05	-0.000447995	-0.000619153	-0.000382418	-0.000248927	-0.0001413	0.000144714	0.000569335	0.000968338	0.00119	0.00174	0.00206
617.168	-0.000145811	9.41189e-05	-9.05167e-06	-0.000140192	9.01307e-05	1.04618e-05	0.000223495	3.01888e-05	2.63117e-05	-6.1975e-05	-0.00019684	1.1954e-05	0.000122878	-3.96137e-05	-1.60561e-05	0.000132157	0.000180103	-7.96284e-05	0.00014744	3.92363e-05	0.000117405	0.000132882	4.96607e-05	6.97683e-05	-2.72284e-05	0.000104555	0.000153896	0.000198693	-5.93652e-05	6.15597e-06	1.37033e-05	2.87437e-05	4.67776e-05	1.31553e-05	3.98088e-05	-5.43089e-05	-0.000120037	-0.000119473	-0.000290724	-0.000381634	-0.000421759	-0.000299112	-0.000234802	8.4956e-05	0.000772694	0.000663308	0.00135	0.00164	0.00168
618.351	0.000180079	-2.19292e-05	8.20288e-05	5.10605e-06	-0.000125519	-5.75589e-05	4.48239e-05	0.00014736	2.26613e-05	7.72673e-06	-0.000106609	1.6802e-05	-8.5399e-05	-6.49785e-05	-4.4595e-05	8.23808e-05	2.77311e-05	-0.0002283	9.65367e-05	5.79716e-05	9.44026e-05	-6.56757e-05	0.000168078	-0.00017365	-0.000163075	-8.97304e-05	-1.94125e-05	0.000232879	4.68261e-05	0.00010819	0.00010203	0.000318677	-1.64875e-05	0.00021733	-2.54286e-05	7.79985e-05	3.86458e-05	-7.71645e-05	-0.000195214	-0.00040768	-0.000265016	-0.000177865	1.37028e-05	0.000106334	0.000504464	0.000770059	0.0013	0.00159	0.00197
619.535	8.37278e-06	-1.37199e-05	0.000132038	-2.84728e-05	8.26998e-05	-0.000243085	-0.000117354	0.00010736	-1.47728e-05	0.000112421	-2.73797e-05	0.000111923	8.742e-05	-1.91177e-05	-0.000178332	-9.30499e-05	0.000113242	-2.13477e-05	-0.000162786	1.90264e-05	-3.2157e-05	7.83927e-05	-0.000102371	-6.56394e-06	-4.38568e-05	-7.81944e-05	-3.93908e-05	-8.16567e-05	-0.000211762	0.00022484	-1.0518e-05	-0.00015205	0.000149899	0.000163235	5.59422e-05	-0.000177573	-0.000252545	-0.000177168	-0.000267561	-0.000464212	-0.000198382	-0.000197467	-0.000134608	9.23864e-05	0.000523731	0.000972067	0.00118	0.00138	0.00196
620.718	-0.000116854	3.6257e-05	0.000125641	0.000157183	-1.1009e-05	3.0958e-05	-3.07906e-05	7.01959e-05	-5.12931e-05	0.000216217	3.09051e-05	-7.83154e-05	-0.000194632	-6.38672e-05	-0.000120596	-8.66119e-05	1.94112e-05	-7.53257e-05	-0.000106377	-0.000243121	-9.52313e-05	0.00017872	7.24305e-05	3.20128e-05	-2.31529e-05	-0.000185234	-4.31139e-05	-0.000154987	-4.72851e-05	-0.000178568	-0.000279922	-0.000172986	-3.35383e-05	-0.000150542	-0.000259076	-8.04922e-05	-0.000221363	-5.19746e-05	-0.000448667	-0.00076573	-0.000493792	-0.000349722	-0.000274442	-2.52094e-05	0.000178543	0.000637737	0.0011	0.00164	0.00178
621.902	-5.95286e-05	3.37041e-05	0.000124098	4.7261e-05	-4.69422e-05	-0.000105773	-0.000104477	-6.12308e-05	-4.74315e-05	8.4689e-05	-9.57454e-05	9.69847e-05	-1.41092e-05	-1.12005e-05	0.000159701	2.73755e-05	-2.14803e-05	-8.79842e-05	3.50427e-05	0.000187112	-2.21964e-05	9.33493e-05	2.49236e-05	-9.21334e-05	1.93531e-05	6.76598e-05	0.000141315	0.000164397	0.000231281	7.30028e-05	-0.00013773	0.000102029	-7.37539e-06	0.000130343	0.000109647	0.000248287	9.66269e-06	-0.000182136	-0.000309198	-0.000378345	-0.000460397	-0.000417735	-0.000292631	0.000117682	0.000486136	0.000788545	0.00126	0.00166	0.00186
623.086	-5.47774e-05	0.000212586	0.000194676	-4.15131e-05	-1.63922e-05	-9.85288e-05	9.4423e-05	2.77711e-05	-0.000112574	0.000101865	-0.000135878	-0.000172136	-0.000164119	-8.30603e-05	0.000247657	0.000180599	9.26481e-05	1.73522e-05	0.000134431	7.5721e-05	6.66315e-05	4.41969e-05	0.000317943	-9.60263e-05	-2.5747e-05	0.000190186	9.91203e-05	-5.77481e-05	-0.000282315	0.000151638	0.000111366	0.000303757	-0.00012597	4.76827e-05	-0.000129921	0.000306101	1.47524e-05	2.00102e-05	-0.000397165	-0.000540481	-0.000402612	-0.000472116	-0.000243545	0.000299846	0.000433531	0.000692487	0.00115	0.00145	0.00186
624.27	-0.000115869	5.72892e-05	0.000173294	-3.7832e-06	3.15079e-05	9.87159e-07	8.30418e-05	-0.000127327	3.0552e-05	1.9894e-05	-4.80548e-05	-0.000197072	-7.76569e-05	0.000246297	-7.31008e-05	-1.07578e-05	0.00028556	3.32685e-05	1.0802e-05	-2.61296e-05	-6.21095e-05	-0.000157116	-6.67251e-05	-6.95336e-05	-7.37305e-05	0.000170865	-4.91973e-05	0.000142918	-9.4877e-05	4.33219e-05	-0.000243332	3.33277e-05	-1.29351e-05	0.000158734	-0.000271126	-5.55731e-06	0.00010744	-5.63293e-05	-0.000455544	-0.000522284	-0.000768816	-0.000652786	-0.000243589	1.17667e-05	0.000252836	0.000628171	0.000817987	0.00145	0.00162
625.454	-0.000100042	3.83298e-05	0.000130049	-6.57206e-05	7.01943e-06	8.02179e-05	-5.41375e-05	5.45493e-05	7.61266e-05	-0.000186556	-0.000129937	8.56459e-05	-9.10111e-05	0.00012085	3.46159e-05	1.6906e-05	-4.65466e-05	0.000204624	-9.67863e-05	0.000292305	-7.25697e-05	6.89559e-05	-0.000226603	8.83825e-05	-0.000204018	3.02934e-05	-1.62176e-05	0.000177396	-0.000106297	5.15424e-05	7.27984e-05	6.61996e-05	-1.84046e-05	3.65076e-06	6.75368e-05	-9.61537e-05	9.92317e-05	-3.6626e-05	-0.000176111	-0.000629949	-0.000676007	-0.000541895	-0.000525009	-3.87804e-05	0.00018664	0.000512335	0.000839094	0.00132	0.00168
626.638	-8.12034e-06	3.85866e-05	0.000137583	-0.00024133	-1.9954e-05	-5.43945e-05	-7.58295e-06	0.000110421	1.20053e-05	1.02364e-05	-0.000137351	-1.12724e-05	0.000106789	-1.05621e-05	7.49467e-05	0.000123785	-0.000126416	-1.73897e-06	9.68749e-05	6.85735e-05	0.000158415	0.000255535	0.000209672	0.000159859	-0.000215459	3.72131e-05	0.00012686	0.000187901	-8.93386e-05	9.89001e-05	0.000204377	2.75305e-05	2.31694e-05	-3.72436e-05	0.000193086	-1.57483e-05	0.000128358	5.36927e-05	-0.000226918	-0.000556969	-0.000636785	-0.0006495	-0.000347342	-1.68348e-05	0.000301198	0.000388043	0.000821403	0.00133	0.00179
627.823	-0.000158103	-1.12263e-06	4.78715e-05	-0.000148409	4.14632e-06	-3.87523e-05	-1.30409e-05	0.000152225	0.000114722	0.000113934	3.58623e-05	-3.23327e-05	-1.01106e-05	2.5724e-06	-6.9462e-05	6.95139e-05	-5.02889e-05	-0.000199685	1.2538e-05	1.21626e-05	-5.14638e-05	-3.41679e-05	-9.7576e-06	5.9119e-05	-0.000128406	-7.22521e-05	-3.39075e-05	8.8364e-05	1.90231e-05	0.00011402	-3.4976e-05	-8.02167e-07	3.86122e-05	9.02683e-05	0.000209411	0.000187221	-3.85144e-05	-5.78015e-05	-0.000440086	-0.000620708	-0.000364484	-0.000678084	-0.000171034	-0.000312577	0.00029133	0.000368606	0.000829251	0.00116	0.00162
629.007	0.000115745	-0.000186181	5.00228e-05	3.00737e-05	-4.69717e-05	-6.71558e-05	9.64529e-05	0.000117955	-1.76967e-06	-3.13184e-05	-7.30479e-06	-4.61527e-06	-9.06625e-05	8.30459e-05	-5.73161e-05	-0.000147769	4.82629e-05	-0.000298464	-6.612e-05	-7.10666e-05	-1.77545e-07	-1.24069e-05	-0.000108819	5.44908e-05	-0.000150616	-5.13013e-05	4.64383e-05	5.56524e-06	4.78249e-05	-8.09645e-05	0.000141117	-9.52676e-05	-0.000122186	7.90685e-05	3.87044e-05	0.00019177	0.000229044	-0.000214286	-0.000419507	-0.000671775	-0.000485465	-0.000737623	-0.0002868	-0.000540113	3.75441e-05	0.000471099	0.000693655	0.00122	0.00154
630.192	8.433e-05	-6.90497e-05	2.05839e-05	9.70613e-05	-0.000177145	9.419e-06	-0.000248474	7.02264e-05	2.05084e-05	2.15991e-05	5.98454e-05	7.80209e-05	-5.74986e-05	7.09566e-05	1.9616e-05	7.054e-06	3.32972e-05	9.52798e-05	-0.000124401	-0.000232465	-0.00013844	-5.29e-05	1.83395e-05	7.3749e-05	-4.1619e-05	-1.27707e-05	2.73634e-05	-5.3096e-05	7.44441e-05	-1.28977e-05	0.000141146	0.000151635	1.87793e-05	1.9524e-05	-6.35008e-05	-5.71879e-05	3.00964e-05	1.90449e-05	-0.000447723	-0.0006099	-0.000746192	-0.000565682	-0.00050016	-0.000283229	-6.7603e-05	0.00037036	0.000808854	0.00108	0.00139
631.377	3.47553e-05	0.000133745	5.43037e-05	9.4262e-05	-4.53842e-05	-4.69813e-05	1.13995e-05	-8.41857e-06	6.69068e-05	7.89959e-05	-0.000122843	-0.000159532	-9.51961e-05	-8.3482e-06	1.23355e-05	-6.38057e-05	-1.15697e-05	4.52647e-05	7.76825e-05	8.89286e-05	-5.29823e-05	8.15904e-05	9.24326e-05	5.81081e-05	3.8129e-05	6.40169e-05	0.000105305	5.72614e-06	-0.000213703	2.02421e-05	0.000121893	0.000117614	8.62071e-05	0.000137686	4.17095e-05	2.79578e-05	0.000123827	6.63179e-05	-0.000478564	-0.0007288	-0.000594007	-0.000815706	-0.000652494	-0.000439332	-1.14011e-05	0.000257738	0.000675198	0.00106	0.0013
632.562	-2.04775e-05	9.42406e-05	1.09759e-05	4.12589e-05	-2.70452e-05	5.83945e-05	0.000129766	-3.59168e-05	-7.34043e-05	0.000167983	-6.72385e-06	-0.000106038	-0.000147383	4.89468e-05	-0.000134577	4.2082e-05	1.20317e-05	5.19791e-05	0.000137373	-5.50261e-05	4.29459e-05	2.06485e-05	5.11459e-05	-0.000306255	-0.000130331	0.000103089	-6.01461e-05	4.57424e-05	-0.000117296	5.5868e-05	2.83205e-05	-8.16754e-05	7.3072e-06	0.000128739	0.000170358	8.73774e-05	0.000104701	-4.88774e-05	-0.000396697	-0.000468602	-0.000703765	-0.000766824	-0.000702929	-0.000305557	-3.11254e-05	0.00036961	0.000729874	0.00111	0.00138
633.747	1.60741e-05	8.09216e-05	0.000138113	9.45001e-05	0.000243874	-1.38836e-05	-1.01247e-05	-4.89552e-06	2.68172e-05	-3.9995e-05	-0.000130724	-6.26302e-05	-0.000170266	-1.27507e-06	-0.000166505	0.000186613	-1.2683e-05	-7.14115e-05	6.31274e-05	-0.000119404	6.08242e-05	-3.1348e-05	-4.70886e-07	-5.68864e-05	0.000114473	-2.54615e-05	4.41069e-05	0.000131168	7.45673e-05	-5.72128e-05	0.000236221	1.43745e-05	0.000135961	6.22513e-06	2.80165e-05	0.00014048	8.19829e-05	-7.91639e-06	-0.000550196	-0.000654026	-0.000557745	-0.000838372	-0.000643913	-0.000455968	-5.59403e-05	8.04465e-05	0.000738006	0.00103	0.00156
634.932	0.000165385	-4.40549e-05	8.22436e-05	3.79725e-05	6.87451e-05	-1.6708e-05	-9.13872e-05	-2.82198e-05	-8.18626e-05	-0.000125582	-0.000109241	9.94907e-05	-3.11196e-05	9.58461e-05	-2.15076e-05	9.03271e-05	-0.000193577	9.40606e-05	-6.39324e-06	-0.000134037	-0.000101038	8.95728e-05	-1.764e-05	-0.000101238	-1.91088e-05	0.000119744	0.000133553	5.53132e-05	-0.000179193	2.26448e-05	0.000348589	5.41585e-05	0.00011263	0.000104748	-2.88896e-06	-2.81417e-05	-1.53828e-05	-8.01447e-05	-0.000466288	-0.000667053	-0.000851302	-0.000782293	-0.000748718	-0.000562835	-0.000158144	0.00023086	0.000287778	0.000946605	0.00135
636.117	5.72254e-05	-6.63272e-05	0.000116718	0.000140157	2.38478e-05	-2.63562e-05	-0.000132576	-2.81054e-05	-8.81807e-06	7.27647e-05	-0.000132084	-4.34957e-05	-8.44339e-05	9.81317e-05	1.33523e-05	0.000156677	-2.83549e-05	4.63479e-05	0.000185414	7.10775e-05	0.000127977	-0.000116276	2.02611e-06	-1.47159e-06	0.000143087	2.26894e-05	0.000167492	-0.000113765	9.17875e-05	3.50842e-05	0.000146185	2.84157e-05	9.85526e-06	8.36601e-05	-2.65509e-05	5.91153e-05	1.15322e-05	-4.86456e-05	-0.000408908	-0.000674084	-0.000711641	-0.000874097	-0.00073894	-0.000566642	-0.000401306	-0.000152589	0.000283549	0.000970022	0.00119
637.303	0.000114695	-5.96428e-05	0.000103723	0.000166019	-3.67404e-05	-0.000236408	-0.000108031	0.000104175	4.75132e-05	7.96308e-05	-6.26613e-05	-1.8277e-05	-5.9763e-05	-9.40909e-05	5.98577e-05	0.000159602	6.19464e-05	-1.20743e-05	5.57331e-05	0.000135378	3.94181e-05	-9.31821e-05	-5.11028e-05	0.000102842	4.71294e-05	-5.87579e-05	-3.12675e-05	7.99335e-05	-1.03547e-05	-3.51307e-06	-2.96233e-05	0.000102377	4.12266e-05	-3.24192e-05	-8.45372e-05	4.77396e-05	-0.000132314	5.16478e-05	-0.000566743	-0.00061797	-0.000764517	-0.000852809	-0.000832169	-0.000606261	-0.000441129	-0.000162984	0.000503208	0.000887921	0.00121
638.489	9.31672e-06	-0.000132747	9.50881e-05	8.35146e-06	0.000136989	7.22151e-05	-0.000177415	1.36568e-05	1.80444e-05	0.000160075	-1.96387e-05	-3.56693e-06	-7.05249e-05	7.09456e-05	-0.000180789	3.90452e-05	0.000158733	2.61811e-05	0.000181249	-0.00011299	-9.22135e-05	0.000184578	0.000201175	2.20785e-05	-3.50484e-05	0.000122727	1.77163e-05	4.3047e-05	4.853e-05	-6.33291e-05	6.84541e-05	3.65092e-06	4.84272e-06	-1.03861e-05	-6.48361e-05	5.44171e-05	-0.000122673	-2.47672e-06	-0.000461046	-0.000679723	-0.000809661	-0.000989147	-0.000824171	-0.0007346	-0.000498091	-9.40355e-05	0.000522884	0.000661095	0.00128
639.674	3.27386e-05	9.09947e-06	3.91791e-05	2.03261e-05	-4.90302e-06	-6.0637e-06	-0.000207947	-2.14983e-05	0.000200757	2.9031e-05	-7.49762e-05	-2.47873e-05	1.05944e-05	6.38665e-07	-2.1888e-06	6.43351e-05	-5.67189e-05	-7.74833e-05	0.000184933	6.97654e-05	5.8068e-05	-0.000106662	3.50092e-06	-4.05538e-06	0.000103181	6.33855e-05	0.00012763	6.19665e-05	-1.27601e-05	0.000205762	-1.49807e-05	9.51709e-05	7.39116e-06	-9.51036e-06	4.15207e-05	0.000107068	-1.31376e-05	-1.75886e-05	-0.000442419	-0.000706706	-0.000783047	-0.000929861	-0.000925689	-0.000710308	-0.000435683	-0.000110931	0.000120967	0.000727872	0.00125
640.86	0.000162063	6.38474e-05	0.000178082	-9.00296e-05	-1.03938e-05	1.25531e-05	-6.32572e-05	-0.000200903	2.29656e-05	5.94122e-05	-1.41848e-05	-9.37027e-05	-4.4298e-05	4.9869e-05	-3.20228e-05	5.80163e-05	0.000127749	4.09354e-05	5.5698e-05	-0.00022842	-0.000157063	7.08111e-06	3.64434e-05	7.22889e-05	4.54572e-05	-2.73474e-05	7.14076e-05	-3.08634e-05	-0.000108763	7.9517e-05	-5.43111e-05	0.00025837	-0.000140477	1.53396e-05	5.82127e-05	3.55802e-05	-0.00012099	-6.43205e-05	-0.000528635	-0.000890999	-0.00102	-0.00114	-0.00106	-0.000623474	-0.000674833	-0.00010154	0.000238538	0.000616101	0.00109
642.046	-7.63451e-05	-8.85863e-05	0.000116293	3.87079e-05	6.42514e-05	-0.000109604	0.00011486	0.000105864	-9.94693e-06	8.68212e-06	1.67707e-06	-3.57165e-05	1.30848e-05	-0.000116412	-2.68087e-05	0.000216284	8.89477e-05	-6.81193e-05	1.07943e-05	0.000174422	2.69827e-05	7.42262e-06	-2.7785e-05	2.08722e-05	8.45402e-05	6.20514e-05	-2.80632e-05	-0.000164603	-3.97215e-05	0.000199454	-5.29241e-05	5.86026e-05	-2.62671e-05	7.37203e-05	-4.6164e-05	8.16046e-05	-0.000110987	2.60057e-05	-0.000377632	-0.000906311	-0.000853849	-0.00104	-0.000879159	-0.000912609	-0.000632776	-0.000319173	2.33152e-05	0.000623673	0.00083683
643.233	-4.00821e-05	-5.28871e-05	-4.26746e-05	7.70847e-05	3.74038e-05	4.31834e-05	-0.000119365	-5.99794e-05	0.000119821	0.000196793	-0.000145782	0.000112713	-7.77033e-05	-3.86708e-05	-9.85385e-06	-7.29871e-05	0.000118562	-1.81306e-05	0.000162113	1.62948e-05	-0.000152753	8.32626e-06	3.80152e-05	-6.60597e-05	-0.000127341	5.88969e-05	9.65839e-05	-0.000177568	-0.00015736	1.94271e-05	-7.45827e-05	8.70366e-05	6.78691e-05	5.5883e-05	-9.21912e-05	-4.04954e-05	-4.65327e-05	2.45722e-05	-0.000370422	-0.000796943	-0.00103	-0.00113	-0.00106	-0.000963185	-0.000487141	-0.00043093	-5.31323e-05	0.000490477	0.000786217
644.419	0.000127817	3.46255e-05	0.000108336	9.74458e-05	-7.84479e-05	-7.63583e-05	7.22421e-06	-1.93726e-05	-2.2829e-05	4.40093e-05	-0.000137231	0.000112921	-0.00018365	3.8519e-05	-5.3009e-05	9.34336e-05	0.000132869	-0.000112697	-7.01744e-05	-5.07139e-05	-2.46188e-05	-0.000123572	7.42461e-05	-1.71401e-05	-0.000116261	4.96648e-05	5.05074e-05	-3.20755e-05	-0.000114818	-2.5658e-05	8.16937e-05	5.43275e-05	3.90025e-05	-4.40914e-05	0.000126592	-7.61222e-06	0.000118927	-9.71049e-05	-0.000385649	-0.000834842	-0.000897331	-0.000974783	-0.00108	-0.000956701	-0.000540405	-0.000504578	-0.000186878	0.000478681	0.000683649
645.605	-3.34195e-05	-4.79756e-05	9.01623e-05	7.10175e-05	3.19666e-06	-0.000106717	-3.43075e-05	-4.16276e-06	-0.000136953	6.54089e-05	3.50277e-06	4.83308e-05	3.59345e-05	-2.24713e-05	6.84538e-05	4.65416e-05	5.81924e-05	-1.77748e-05	1.98498e-05	3.2658e-05	2.37075e-05	2.40401e-05	0.000197689	-0.000135184	-3.08516e-05	0.000218956	0.000104976	-0.000171947	3.41792e-05	-9.97576e-05	3.76973e-05	0.000226157	6.07815e-05	4.03888e-05	6.95922e-05	-2.37808e-05	6.93174e-05	-7.26119e-05	-0.000457255	-0.000767012	-0.000970612	-0.00103	-0.00124	-0.00090678	-0.000612731	-0.0004617	-0.000224749	0.00042709	0.000688105
646.792	-0.000180597	-3.73481e-05	0.000202035	6.16067e-05	-8.46401e-05	5.01698e-06	4.18768e-05	2.46241e-06	-4.66206e-05	-1.46377e-05	-3.11498e-05	2.52038e-05	-3.71111e-05	5.16974e-05	4.22056e-05	-1.73127e-05	5.7353e-05	6.94537e-05	6.08313e-05	-0.000145245	-7.37856e-05	-9.201e-05	9.40523e-05	8.65197e-05	-3.59717e-05	0.000219193	-1.69878e-05	-1.58529e-05	9.28089e-05	-8.24272e-05	-8.04846e-05	-1.43759e-05	-0.000165939	0.000128397	-0.000106508	-5.27755e-05	-0.000128413	-0.000168578	-0.000547829	-0.000973686	-0.00111	-0.00111	-0.00123	-0.00101	-0.00085656	-0.000565049	-0.000170514	0.000332146	0.000671972
647.979	-0.000101813	-6.95697e-05	8.4295e-06	4.63901e-06	2.96304e-05	-2.34619e-05	5.66707e-05	-1.11207e-05	-1.53892e-05	9.52144e-05	0.000112535	-4.69036e-05	0.000108592	-3.47314e-05	-0.000112721	0.000149984	-9.61312e-05	2.55364e-05	-5.60058e-05	-0.000278436	-0.000189679	-7.98055e-05	2.13473e-05	5.98109e-05	-5.88977e-05	-2.00777e-05	7.43506e-05	0.000119788	1.54278e-05	-5.49885e-06	-8.44609e-05	3.36637e-05	-8.40849e-05	0.000141922	-9.14407e-05	-0.000150727	3.44566e-05	-0.000165317	-0.000705152	-0.00104	-0.00112	-0.00122	-0.0013	-0.00112	-0.000888525	-0.000700611	-0.00017925	5.73741e-05	0.000627412
649.166	-4.34696e-05	0.000110103	4.67439e-05	0.00017191	7.42636e-05	-3.94718e-05	1.24065e-05	-9.0397e-05	-9.66054e-05	3.93599e-05	-2.80225e-05	-6.1132e-05	-0.000181282	-4.58764e-07	8.60523e-05	0.000125232	0.000145499	0.000133124	-5.38882e-05	1.76305e-05	8.60569e-05	-8.53199e-05	0.000217935	-7.75322e-05	-1.23079e-05	7.97005e-05	3.36029e-05	5.06807e-05	-2.32865e-05	3.09688e-05	-1.57285e-05	-2.40524e-05	8.07711e-05	0.000125514	0.000137036	-9.66588e-05	5.44096e-05	-5.42192e-06	-0.000535337	-0.000728651	-0.00116	-0.00121	-0.00128	-0.00117	-0.000832332	-0.00065249	-0.00025583	0.000144357	0.000594541
650.353	4.68259e-05	0.000132435	1.61428e-05	-3.13743e-07	-2.93122e-05	4.40481e-05	-0.000102476	-0.00010699	4.23878e-05	3.70735e-05	-5.83795e-05	-7.95572e-05	-0.000102112	5.61501e-05	0.000104077	0.000159664	6.80156e-05	9.11759e-05	1.21771e-07	-0.000157256	2.92759e-05	-9.59173e-05	3.69303e-05	-3.00375e-05	-9.46741e-05	-1.27708e-05	-4.47924e-05	-2.04663e-05	-0.000110148	-8.61847e-05	-3.69486e-05	2.99009e-05	-7.0016e-05	0.000136116	6.88363e-06	-0.000165616	-6.0262e-05	7.6224e-06	-0.00045591	-0.000728001	-0.00104	-0.00135	-0.00145	-0.0012	-0.000963837	-0.000821007	-0.000440447	9.25923e-05	0.000415691
651.54	6.5668e-06	-1.70461e-05	-9.08318e-05	-0.000117349	8.59084e-06	5.90288e-05	-4.67422e-05	5.58993e-05	0.000104546	2.27556e-05	-2.15096e-05	-4.72658e-05	-2.40471e-06	8.73542e-05	-1.59208e-06	0.000242909	-3.69257e-05	-1.48585e-05	5.96525e-05	-9.28318e-05	-8.23558e-05	-2.20403e-05	6.82322e-05	9.55161e-05	9.02461e-05	-2.43557e-05	3.88015e-05	-0.000144065	-0.000174435	8.32053e-05	-6.76244e-05	6.4336e-06	-7.46958e-05	8.88491e-05	8.55191e-05	-2.27222e-06	-7.42421e-05	-4.34901e-05	-0.000470601	-0.000806072	-0.00103	-0.00127	-0.00136	-0.00117	-0.0011	-0.00093506	-0.000482696	0.000117388	0.000485951
652.727	-5.57168e-05	4.35639e-05	4.45501e-05	1.71687e-06	6.04332e-05	-9.02266e-05	7.53908e-05	9.14047e-05	9.19056e-05	-2.28878e-05	-4.63419e-05	-2.12804e-05	-0.000138047	2.29048e-05	-5.73698e-05	0.000107822	6.50367e-05	2.8132e-05	6.1895e-05	6.01574e-05	8.03492e-06	-3.40835e-05	0.000115143	-6.81514e-05	5.42029e-05	-1.94453e-05	-6.80486e-05	-3.44751e-06	-0.000136765	-8.82271e-05	-0.000101312	0.000110005	-7.93786e-06	5.81267e-05	-0.000118312	7.4849e-05	0.000218016	-7.87557e-05	-0.000372782	-0.000837902	-0.00121	-0.00124	-0.00136	-0.0013	-0.00107	-0.000821461	-0.000662745	-2.02864e-05	0.000222868
653.914	6.13354e-06	-2.31725e-05	6.17408e-05	-4.47488e-05	-0.000112221	-0.000274896	-9.89809e-06	-7.35785e-05	0.000173636	2.89546e-05	6.33794e-05	1.55117e-05	5.85995e-05	8.89988e-05	4.15599e-05	0.000132539	1.63325e-06	5.16565e-05	1.80755e-05	-0.000106879	-5.51326e-05	0.000152613	0.000157934	2.60562e-05	-0.000142262	3.54418e-05	7.81245e-05	-0.000153027	-6.13938e-05	-4.7543e-05	0.000109886	5.97518e-05	-2.71733e-05	-5.03756e-05	-0.000144068	4.23069e-05	-2.96684e-05	-0.000113275	-0.000488319	-0.000964568	-0.00125	-0.00128	-0.00128	-0.00133	-0.00113	-0.000982533	-0.000579834	-3.78362e-05	0.000162385
655.102	7.69427e-05	3.45219e-05	6.19686e-05	2.0482e-05	-2.77312e-05	-0.000107123	8.97359e-05	-0.000164096	7.95328e-05	0.000106368	-2.40949e-05	-0.000104986	2.33057e-05	-0.000107937	4.31116e-05	-8.61243e-06	5.60786e-05	-5.07258e-05	0.000144438	-0.000155955	8.25807e-06	0.000155103	-6.07697e-05	-6.32253e-05	-4.8729e-05	2.07424e-05	4.46812e-05	-6.75377e-05	-5.83064e-06	5.97612e-05	-1.12366e-05	-5.08137e-05	-1.64619e-06	3.73029e-05	-9.36068e-05	-3.58372e-05	-5.38884e-05	-0.000115426	-0.000594341	-0.000897565	-0.00119	-0.00135	-0.00139	-0.00141	-0.00127	-0.00104	-0.000589133	-0.000147446	7.95338e-05
656.29	3.9628e-05	6.4823e-05	0.000146647	1.63914e-05	-3.22151e-05	-0.000129822	-0.000158813	-5.31302e-05	3.85152e-05	4.95435e-05	-0.000181416	0.000127072	3.29224e-05	2.18107e-05	1.80421e-05	0.000236241	-1.22147e-05	-1.11599e-05	-3.07329e-05	-0.000242945	-8.12957e-05	8.14326e-05	4.85711e-06	-5.8509e-05	-1.234e-05	5.69811e-06	-6.60278e-05	6.47206e-05	-0.000109256	1.21736e-05	4.19141e-05	8.69666e-05	-6.38212e-06	0.000114462	0.000126736	0.000120654	-5.13412e-05	4.86476e-05	-0.000452261	-0.000908282	-0.00125	-0.00128	-0.00157	-0.00131	-0.00121	-0.00112	-0.000850309	-0.000345285	-0.000101837
657.477	5.53289e-05	9.74162e-05	9.45417e-05	7.44627e-05	-8.02753e-06	8.23275e-05	-0.000115774	-0.000115189	-2.19802e-05	7.65084e-05	-0.000203291	-5.96794e-05	2.26887e-05	2.23037e-05	-1.63656e-06	7.77098e-05	6.10789e-05	-5.85266e-05	7.25467e-05	-0.000114941	3.60388e-05	-3.33655e-05	5.73688e-05	4.55224e-05	6.59918e-06	5.59363e-05	2.95901e-07	1.86962e-05	-0.000146578	4.156e-05	2.85533e-05	0.000129449	-5.30622e-05	5.52511e-05	-2.99122e-05	-5.6496e-05	0.00014501	-0.000115666	-0.000473424	-0.00106	-0.00132	-0.00146	-0.0016	-0.00151	-0.00125	-0.00124	-0.000899432	-0.000383408	-0.000172619
658.665	2.04389e-05	-0.00010983	0.00011846	0.000245256	-0.000102885	-0.000164995	-1.98795e-05	0.000163603	8.45877e-05	6.17478e-05	-0.000166504	-3.775e-05	-8.38381e-05	-3.43747e-05	2.59632e-05	0.000123159	0.000149337	-6.41941e-05	7.53323e-05	-0.000168975	-3.47702e-05	3.21013e-05	6.12893e-05	9.87771e-05	-8.14105e-05	0.000157424	7.33866e-06	-1.8406e-07	-7.62129e-05	0.000189842	9.67782e-05	2.40568e-05	2.13455e-05	3.56852e-05	-7.09975e-05	-0.000107244	-3.16989e-05	-0.000225339	-0.000509145	-0.00108	-0.00138	-0.00147	-0.00156	-0.00156	-0.00159	-0.00111	-0.000885635	-0.000616052	-0.000207797
659.854	4.01033e-05	5.32134e-05	0.000151388	6.9152e-06	5.90799e-05	-0.00010129	-0.000173869	5.5589e-05	0.000105497	-1.90285e-05	-0.000166001	-4.76233e-05	-0.000143144	-1.74218e-05	0.000196591	7.35534e-05	3.98559e-05	-7.2759e-05	-6.93312e-05	0.000190407	-1.41895e-05	7.59458e-05	-8.5544e-05	-4.72187e-05	1.8475e-05	7.62288e-05	-0.000120751	5.19271e-05	-4.47741e-05	2.36668e-05	2.36728e-05	5.80348e-05	8.90948e-05	3.61994e-05	2.93918e-05	3.66135e-05	1.92275e-05	2.75876e-05	-0.000421622	-0.00105	-0.00121	-0.0015	-0.00159	-0.00154	-0.00159	-0.00138	-0.00101	-0.000428487	-0.000264274
661.042	-1.85228e-05	2.89238e-05	-7.18468e-05	-2.55117e-06	3.97425e-05	4.49042e-05	7.03968e-05	-1.47963e-05	-7.63773e-05	3.5289e-05	-0.000147808	2.71921e-05	-6.11101e-05	0.000146545	1.85549e-08	-0.000103202	-1.20567e-05	-9.14968e-05	0.000164869	6.07444e-05	8.51884e-05	-9.61564e-06	-7.78591e-05	-0.000107247	-0.000147698	-3.68097e-05	-1.83228e-05	5.7301e-05	-7.75155e-06	1.56153e-05	-7.6675e-05	3.20592e-05	7.77401e-05	-3.42842e-05	-0.000109144	0.000125177	6.6051e-05	-9.38406e-05	-0.000428758	-0.000938308	-0.00136	-0.00157	-0.00162	-0.00169	-0.0016	-0.00142	-0.00113	-0.000742392	-0.000329737
662.23	9.49238e-05	1.48333e-05	4.5381e-05	-8.27593e-05	0.000143653	0.000104863	-9.63649e-05	-6.6676e-05	-0.000107092	-0.000105029	1.09729e-05	1.52851e-05	-4.85248e-05	6.06343e-06	7.04706e-05	0.000142064	8.49383e-05	-9.74324e-05	0.000215053	-6.38929e-06	-0.000207807	-3.80551e-05	-0.000108553	-9.82231e-05	-0.000154255	-0.000143253	0.000111725	3.7146e-05	-8.57273e-05	-7.47776e-05	-5.42315e-05	-5.68377e-05	3.25834e-05	4.54595e-05	2.09509e-05	-1.04446e-05	0.000100829	-0.000143187	-0.000437671	-0.000997673	-0.00124	-0.00165	-0.00171	-0.00178	-0.00153	-0.0015	-0.00124	-0.000790789	-0.000533558
663.419	-4.87987e-05	2.01689e-05	0.000100085	5.63672e-05	0.00010072	-5.39153e-05	-9.73665e-06	-6.67368e-05	0.000103647	3.68047e-05	-4.44671e-05	-0.000184946	0.000109988	3.47309e-05	-0.000153912	0.000317769	-2.92967e-05	-0.000145588	0.000105782	-0.000189857	-9.61813e-05	-0.000112977	6.99299e-06	-6.91073e-05	-2.29964e-05	-1.70034e-05	-0.000142845	-1.63144e-05	-0.000119788	-0.000136715	-0.000116509	-7.64796e-05	-1.52672e-05	-9.2955e-05	3.48876e-05	-4.66285e-05	-0.000134613	4.64728e-05	-0.000496537	-0.000890577	-0.00137	-0.00157	-0.00175	-0.00191	-0.00161	-0.00167	-0.00131	-0.000772026	-0.000601424
664.607	0.000111371	3.24135e-05	0.000130731	-1.70808e-05	0.000161233	-6.83619e-05	0.000106315	-2.56455e-06	4.52665e-05	2.44271e-05	-0.000172891	-8.20332e-05	-0.000131864	-0.000101688	-3.52756e-05	-3.49349e-05	-0.000111483	-2.15626e-05	7.14087e-05	-5.18345e-05	-0.000137171	-2.86194e-05	0.000118588	-1.75182e-05	-3.87222e-05	0.000123478	-6.92566e-05	4.38523e-05	2.26534e-05	-0.000139321	0.00016973	2.67851e-05	-3.61241e-05	0.000108966	2.0313e-05	-4.20418e-05	0.000192897	3.71631e-05	-0.000382033	-0.000972048	-0.0013	-0.00146	-0.0018	-0.00183	-0.00181	-0.00176	-0.00136	-0.000940629	-0.000569016
665.796	0.000144805	-0.000179655	1.6332e-05	4.56221e-05	-6.53722e-05	-1.77032e-05	3.37533e-05	4.55809e-05	2.55538e-05	7.56687e-05	-0.000135677	1.21374e-05	-1.4945e-05	1.38638e-05	3.57432e-08	9.15498e-05	5.31227e-05	-5.21758e-05	0.000152097	8.74915e-05	6.96427e-05	0.000314823	5.33206e-05	2.54573e-05	-9.73462e-05	6.68758e-05	4.42765e-05	-4.85487e-05	0.000110828	9.90104e-05	2.59058e-06	6.87702e-06	7.46532e-05	2.43102e-05	-1.8962e-05	3.88688e-05	-9.95906e-06	1.87587e-05	-0.00045976	-0.00106	-0.00137	-0.00171	-0.00172	-0.00179	-0.00176	-0.00166	-0.00141	-0.00103	-0.000654079
666.985	-4.73491e-06	-6.80962e-05	5.202e-05	-2.54592e-06	5.46469e-05	-6.09055e-05	-0.000121796	-9.9714e-05	4.32001e-05	4.30725e-05	4.00018e-05	-0.000162461	0.000112413	6.7606e-05	0.000107293	1.99301e-05	-0.000124383	-0.000207406	-2.93425e-05	-0.000128254	7.68902e-05	-7.96865e-05	7.99625e-05	-6.0238e-05	-0.000183879	0.000109882	5.33492e-05	3.51481e-06	-8.37282e-05	-0.000136073	-8.84056e-05	-0.000270068	0.000120896	2.9547e-05	1.53458e-05	-6.71748e-05	-2.8029e-05	-0.000115607	-0.000448582	-0.00105	-0.00145	-0.00178	-0.00177	-0.00201	-0.00185	-0.00187	-0.00162	-0.000944867	-0.00062581
668.174	-5.50245e-05	-1.27862e-05	1.53159e-05	8.03206e-05	-1.93201e-05	-1.26095e-05	-1.77418e-05	2.91835e-05	2.87349e-06	4.05736e-05	-8.47303e-05	-6.78565e-05	0.000152127	-5.07839e-05	4.59202e-07	2.09687e-05	0.000124895	-3.14534e-05	0.000101297	6.74746e-05	0.000110534	-9.61929e-05	7.78886e-05	1.63602e-05	-0.000151606	0.000100919	-4.89452e-05	5.11264e-06	-0.000103507	1.25151e-05	-0.000109365	0.000129588	6.83843e-05	2.18643e-05	8.43983e-05	1.04659e-05	1.7858e-05	-5.43223e-05	-0.00031794	-0.000963969	-0.00144	-0.00172	-0.00185	-0.0019	-0.00194	-0.00196	-0.00177	-0.00115	-0.000857862
669.363	-1.06179e-05	2.43913e-05	0.000146829	0.000108144	-6.07368e-05	-7.52552e-05	-2.1649e-05	-6.02008e-05	4.24852e-05	-0.00012946	-0.000133695	-8.86072e-05	0.000139644	6.42705e-05	5.44564e-05	2.05458e-05	3.25402e-05	-6.13427e-05	0.000150364	-2.95627e-05	-8.03795e-05	-3.71396e-05	1.38136e-05	-5.22114e-05	-4.01095e-05	0.000147019	0.00011255	-1.99971e-05	7.83485e-05	7.16435e-05	0.000104595	2.07502e-05	0.000198027	6.17963e-05	-9.70442e-05	-3.65127e-06	9.0673e-05	7.2103e-05	-0.000233272	-0.00102	-0.00129	-0.00154	-0.00186	-0.00216	-0.00184	-0.0019	-0.00164	-0.00126	-0.000774212
670.553	5.61469e-05	-0.000208408	5.51557e-05	2.73982e-05	0.000168432	-4.27885e-05	-8.04827e-05	2.28729e-05	-1.51964e-05	-0.00011329	7.02374e-05	-9.07753e-05	-4.58377e-05	0.00011667	7.98651e-05	4.14994e-06	2.26218e-05	-4.23036e-05	-3.31443e-05	-2.62021e-05	-3.5811e-05	-4.99472e-05	5.29149e-05	-1.23964e-05	-0.000139337	-5.13858e-05	-7.4276e-05	-9.06582e-05	-0.000167511	-4.69141e-05	0.000120261	8.13774e-05	0.00012337	-6.85104e-06	5.58513e-06	-0.000113351	0.000113833	0.000134885	-0.000410976	-0.00109	-0.00137	-0.00176	-0.00196	-0.00225	-0.00212	-0.00191	-0.0018	-0.0015	-0.00106
671.742	1.29582e-05	-1.00428e-05	8.8727e-06	7.51057e-05	6.65614e-05	8.76482e-05	8.14249e-05	-0.000147075	6.10271e-05	-4.74364e-05	-0.000119596	-4.6702e-05	-7.77154e-05	3.14886e-06	5.182e-05	3.56202e-05	5.74886e-06	5.33744e-05	-2.83107e-05	-1.29024e-06	2.66252e-05	0.000172467	0.000144283	9.39683e-05	-3.73956e-05	0.000205279	-1.86567e-05	9.54506e-05	0.000106722	-4.37061e-05	4.94997e-05	-1.46062e-05	0.00012437	8.33268e-05	3.07867e-05	-0.000132463	0.000104373	-3.00429e-05	-0.000451516	-0.000923586	-0.00138	-0.00176	-0.002	-0.00222	-0.0022	-0.00222	-0.00192	-0.00156	-0.0011
672.932	2.71025e-05	-0.000119446	0.000134444	-8.04048e-06	9.44064e-05	-6.26562e-05	-0.000113156	-7.57388e-05	0.000134187	1.73979e-05	5.76262e-05	6.07802e-05	-0.000183009	-7.9319e-06	4.40329e-05	3.6398e-05	4.16897e-06	-4.43562e-05	6.75842e-05	1.56934e-05	-1.26104e-05	6.86019e-05	0.000102425	-1.72022e-05	-6.32967e-05	4.28018e-05	-0.000107055	0.000131775	3.65276e-05	3.58689e-05	-9.57146e-06	6.03508e-05	9.86696e-05	5.98288e-05	3.59439e-05	-7.45126e-05	5.17911e-06	-1.62576e-06	-0.0004495	-0.00112	-0.00153	-0.00181	-0.00214	-0.00218	-0.00224	-0.00216	-0.00205	-0.00169	-0.00126
674.121	-7.43058e-05	0.000170906	9.79687e-05	2.22838e-05	-1.99214e-05	-5.18298e-05	-7.72055e-06	-2.98696e-05	0.000154835	1.81929e-05	-4.98805e-05	-9.54788e-05	-6.43796e-05	-6.356e-05	-7.24069e-06	0.000104197	8.97067e-05	4.72926e-05	6.19913e-05	-0.000205631	-0.000137001	-9.53566e-05	1.67197e-05	4.4835e-05	4.316e-06	3.61814e-05	-4.92254e-05	0.000105553	7.21411e-05	8.47492e-05	-2.89204e-05	4.8055e-05	-2.62484e-05	4.75575e-05	-0.000202094	0.000109594	0.000101377	3.54074e-05	-0.000349426	-0.00123	-0.00145	-0.00187	-0.00217	-0.00221	-0.00225	-0.00238	-0.00206	-0.00179	-0.00133
675.311	1.91747e-05	8.44478e-05	-7.12919e-05	-1.30629e-05	-0.000114869	-5.17391e-05	-6.2596e-05	3.15387e-05	1.28929e-05	0.00010409	-5.80281e-05	3.1916e-07	-3.11873e-05	8.80819e-05	6.22289e-05	-5.82336e-05	0.000174973	-0.000139411	3.84577e-05	-0.000101357	-2.48797e-05	-6.57063e-05	3.77981e-05	2.13172e-05	1.59637e-06	0.000185256	6.66278e-05	3.47212e-05	6.34422e-06	-0.00011005	0.000117709	3.1782e-05	2.0968e-05	0.000112746	-5.91211e-05	9.90597e-05	0.000139171	-2.16439e-05	-0.000585192	-0.00107	-0.00145	-0.0018	-0.00212	-0.00247	-0.00243	-0.00247	-0.00219	-0.00174	-0.00159
676.501	8.84274e-05	9.7913e-05	-9.69348e-05	-3.23733e-05	8.39561e-06	-4.91274e-05	-1.33543e-06	9.14716e-05	4.0953e-05	3.43787e-05	-0.000140888	-1.62928e-05	7.71577e-06	-1.47372e-06	-3.08295e-05	0.000145278	-2.06189e-05	-2.4651e-05	0.000151115	5.60001e-05	0.000180965	-4.94163e-05	6.63245e-05	1.03587e-05	-1.52687e-05	7.33062e-05	2.97585e-05	-3.16558e-05	-6.1964e-05	-7.94686e-05	-3.63685e-05	1.55751e-05	-8.07148e-05	0.000123261	1.6185e-05	2.91814e-05	6.95758e-05	3.5274e-05	-0.000441661	-0.00111	-0.00163	-0.0019	-0.00236	-0.00253	-0.00258	-0.00248	-0.00243	-0.00208	-0.00161
677.691	6.02489e-05	-3.3207e-05	-3.18113e-05	0.000126014	3.71418e-05	-3.12655e-05	-1.8399e-05	-3.60751e-05	3.94607e-05	0.00015621	-0.000171435	-0.000105179	1.29797e-05	2.71613e-05	-3.18439e-05	0.000110289	1.01985e-05	-0.000138698	3.56347e-05	-0.000229304	-4.65656e-05	-8.94711e-05	9.54409e-05	4.29099e-05	-0.0001641	-6.71291e-05	7.89971e-05	-6.11731e-05	6.4496e-05	-2.64025e-05	2.22269e-05	3.89717e-05	3.23629e-05	0.00011439	1.73798e-05	-8.29339e-07	-6.07183e-05	0.000100368	-0.000349819	-0.00121	-0.00189	-0.00217	-0.00251	-0.00262	-0.00261	-0.00263	-0.00239	-0.00215	-0.00165
678.882	2.97791e-05	-1.62955e-05	-5.26036e-05	-1.72447e-05	-7.93371e-05	-3.94329e-05	0.000102067	4.50298e-05	5.45664e-05	0.000122701	-0.000158694	-4.39987e-05	7.75816e-05	-7.91072e-06	-1.6208e-05	0.00010023	6.35622e-05	2.95181e-05	0.000162386	-0.000109954	6.0751e-06	6.01452e-05	9.51449e-05	-9.59369e-05	-5.47115e-05	6.05632e-05	9.64894e-05	1.61639e-05	5.74332e-06	8.2486e-05	0.000136916	0.00020948	7.25526e-05	0.000111283	-0.000154273	-4.70234e-05	0.000137681	1.72105e-05	-0.000382989	-0.00129	-0.00191	-0.0021	-0.00243	-0.00259	-0.00261	-0.00259	-0.00245	-0.00215	-0.00185
680.072	0.000102022	8.25526e-06	3.33608e-05	-9.82962e-06	8.02003e-05	-7.58122e-05	4.27643e-05	-8.06935e-05	5.24332e-05	0.000113425	-5.94561e-05	-3.03505e-05	-7.87414e-05	-1.69609e-05	-8.06164e-05	0.00014487	4.70172e-05	1.61648e-05	4.6105e-05	-5.2894e-05	8.1819e-05	0.000108394	0.000151402	-6.8417e-05	-5.00276e-05	2.32633e-05	5.20362e-05	7.50369e-05	-4.9895e-05	0.00013624	-4.17512e-05	-8.14618e-05	0.000110321	-4.71121e-06	-2.80172e-05	6.43442e-05	6.88505e-05	6.52984e-05	-0.000482637	-0.0011	-0.00178	-0.00201	-0.00252	-0.00257	-0.00269	-0.00285	-0.0026	-0.00221	-0.00203
681.262	8.92598e-05	8.99453e-05	-9.95636e-05	9.53725e-05	2.00317e-05	-6.30263e-05	2.85344e-05	-6.30553e-05	0.00024171	-4.41311e-05	-0.00020234	1.54669e-05	-7.70202e-05	5.29636e-05	-8.41474e-05	0.000123436	0.000220298	6.42003e-05	3.57417e-05	6.29478e-05	7.1402e-05	2.07845e-05	0.000191819	-3.92469e-05	-8.34077e-06	9.18959e-05	-5.40119e-05	0.000153288	-9.51763e-06	8.74445e-06	3.01476e-06	-5.34704e-05	0.000147369	0.00015473	-1.55326e-05	3.3865e-05	0.000179473	-9.36714e-05	-0.000451985	-0.00111	-0.00173	-0.00223	-0.0024	-0.00273	-0.00282	-0.00287	-0.00277	-0.00239	-0.00206
682.453	4.5323e-05	-7.85715e-06	9.94705e-05	6.63577e-05	-6.29137e-05	-3.58872e-05	-0.000151614	5.07595e-05	0.000114133	-4.73177e-05	-3.02491e-05	7.1767e-05	4.69483e-05	-9.66112e-05	-6.23088e-05	4.04169e-05	6.9461e-05	-5.58279e-05	7.08723e-05	-0.000101113	6.74309e-05	1.02378e-06	-5.64579e-05	0.000151187	-0.000170763	1.08065e-05	6.16606e-05	4.24632e-05	-9.81512e-05	-5.72291e-05	-6.40969e-06	-2.73719e-05	6.60453e-05	0.000111991	-0.000132885	-2.16229e-05	-3.20015e-06	-6.65577e-05	-0.000410144	-0.00125	-0.00198	-0.00241	-0.00263	-0.00278	-0.00292	-0.00291	-0.0029	-0.00266	-0.00216
683.644	5.18287e-06	3.63286e-05	1.73917e-05	4.96526e-05	-8.83713e-05	0.000172155	-8.25922e-05	1.60306e-06	0.000148961	4.54658e-05	-0.000166717	-5.48607e-06	-0.000119738	-9.12234e-06	-4.71251e-06	0.000104254	-5.54716e-05	7.06095e-06	0.000144973	-1.21494e-05	-2.96774e-05	-0.000107722	4.79062e-05	-2.72536e-05	-3.97097e-05	1.30122e-05	-8.18349e-05	9.19376e-05	-1.53626e-05	1.75188e-05	4.50204e-05	-4.88623e-06	3.49378e-07	6.81794e-05	2.7163e-05	1.6117e-05	5.27714e-05	6.68255e-05	-0.000322871	-0.00125	-0.0019	-0.00229	-0.00249	-0.00289	-0.00296	-0.00308	-0.00284	-0.00264	-0.00239
684.835	-1.71069e-05	5.07655e-05	4.82776e-05	1.99639e-05	9.02774e-05	5.66462e-05	-0.000109624	-3.37896e-05	7.3188e-05	8.93346e-05	-6.31641e-05	-3.3452e-05	-5.72608e-05	-3.33972e-05	-8.06588e-05	7.63287e-05	8.96238e-05	-6.5699e-05	-0.000168374	2.19659e-05	3.81278e-05	0.000140153	0.000101089	0.000125448	9.81819e-05	4.19419e-05	-4.01629e-07	5.17765e-05	0.000132763	3.6807e-05	-5.26873e-05	0.000103487	5.259e-05	0.000166744	9.60627e-05	-1.73724e-05	6.44444e-05	1.55351e-05	-0.000322164	-0.00124	-0.00181	-0.00222	-0.00257	-0.00302	-0.00295	-0.00304	-0.00302	-0.00261	-0.00243
686.026	-1.36485e-05	3.51964e-06	-4.42525e-05	2.71164e-05	4.15699e-05	-3.54571e-05	5.97378e-05	4.29056e-05	9.18475e-05	3.69121e-05	-3.90829e-06	-4.42894e-05	9.90188e-06	-0.000153289	-1.86662e-05	4.084e-05	7.12455e-05	2.83457e-07	6.94724e-05	-9.92943e-05	1.60728e-05	9.3699e-06	6.87134e-05	2.96507e-05	-2.84682e-05	-2.23569e-05	-2.23822e-05	-1.95763e-05	4.40235e-06	-4.49098e-05	7.40246e-06	1.06418e-05	0.000166127	0.000174194	-5.69071e-05	-0.00018162	5.33595e-05	6.30819e-05	-0.000363305	-0.00131	-0.00198	-0.00232	-0.00268	-0.00291	-0.00312	-0.00322	-0.00321	-0.00283	-0.00259
687.217	-3.13502e-05	4.10046e-05	0.00012461	-0.000102957	-1.58193e-05	1.80333e-05	-6.16999e-05	8.14165e-05	2.7815e-05	4.58094e-05	2.11661e-05	-9.72932e-05	5.63691e-05	-8.35863e-05	-2.35182e-05	1.50135e-05	8.45407e-05	-3.01666e-06	9.85169e-05	-0.000187666	-0.000140866	0.000118944	2.54404e-05	-1.52701e-05	-0.000157898	-3.65111e-05	-7.19112e-05	-5.12582e-05	-9.83298e-05	-1.85893e-05	1.80246e-05	5.72147e-05	6.27307e-05	4.78521e-06	-7.6573e-05	2.56002e-05	-2.36491e-05	1.07522e-05	-0.000450466	-0.0013	-0.00206	-0.00239	-0.00284	-0.00303	-0.00328	-0.00333	-0.0033	-0.00295	-0.00275
688.409	-2.71104e-05	-0.000125175	0.000116388	4.8284e-05	-9.43373e-06	8.50649e-07	-1.64523e-05	3.51546e-05	0.000130339	-5.97705e-05	2.42119e-05	-9.68855e-05	-8.91726e-05	9.76099e-05	-2.88379e-05	3.63388e-06	-8.02194e-07	7.37301e-05	1.46875e-05	-9.24444e-05	-2.13558e-05	-1.35391e-05	-9.27659e-05	8.11213e-05	-5.24553e-05	2.17761e-05	-7.51404e-05	-0.000135076	-0.000112555	-9.72732e-05	1.8661e-05	0.000192769	2.01399e-05	-0.000116777	-8.85859e-05	-2.34593e-05	7.67036e-05	5.11472e-05	-0.000454189	-0.00136	-0.00209	-0.00254	-0.00296	-0.00308	-0.00315	-0.00333	-0.0033	-0.00318	-0.00294
689.6	7.8155e-06	-4.36833e-05	4.34375e-06	1.62205e-05	1.72459e-05	4.30055e-05	-2.71139e-08	-9.54539e-05	-2.02731e-05	-1.1657e-05	-1.16099e-06	-8.93205e-05	-3.41877e-05	0.000108744	9.83883e-05	8.19682e-05	0.000116877	6.54388e-05	3.51496e-05	-3.73648e-05	1.02032e-05	-6.32294e-05	1.98035e-05	-9.37901e-05	-0.000139483	-5.78976e-05	4.66717e-05	-1.65896e-05	0.000128169	-8.52729e-05	4.18255e-07	9.17445e-05	0.000175644	-2.59398e-06	-5.27544e-05	-2.09594e-05	0.000100227	4.98452e-05	-0.000240175	-0.00129	-0.00209	-0.00239	-0.00281	-0.0031	-0.00321	-0.00346	-0.00344	-0.00312	-0.00301
690.792	-3.61325e-06	-2.32843e-05	-4.61624e-05	8.048e-05	-5.31661e-05	1.62595e-05	-8.4917e-05	-1.12558e-05	8.91963e-05	9.82171e-06	-5.92352e-05	-2.34568e-05	6.78988e-05	1.0157e-05	3.12777e-05	0.000157689	1.39631e-05	6.52391e-05	8.0854e-05	-7.1149e-05	4.37964e-05	1.62029e-05	0.000151865	-5.52795e-05	-5.10482e-05	0.000200021	0.000156413	8.85399e-05	3.20388e-05	-1.59976e-05	7.45892e-05	-4.91513e-05	0.0001802	5.94739e-05	-2.77073e-05	-3.33268e-05	5.67367e-05	0.00010766	-0.000442604	-0.00131	-0.00213	-0.00244	-0.00289	-0.00324	-0.00326	-0.00365	-0.00356	-0.00324	-0.00315
691.984	7.30215e-05	3.1819e-05	-8.31781e-06	-1.18003e-05	-5.19876e-05	3.74815e-05	-3.1218e-05	2.58173e-05	0.000101058	-9.58632e-05	-2.51591e-05	2.51277e-05	-6.07982e-07	-6.94019e-05	3.08761e-08	8.50939e-06	-5.13721e-05	1.8341e-05	8.36869e-05	-0.000118149	0.000126746	-9.29617e-05	0.000105973	3.45198e-05	-9.36077e-05	4.70877e-05	3.98773e-05	1.14788e-06	-6.84493e-05	-1.85503e-05	6.05239e-05	0.000116772	2.22051e-05	2.81611e-05	5.64333e-06	-2.60502e-05	4.52361e-05	0.000153571	-0.000288415	-0.00117	-0.00206	-0.0026	-0.00285	-0.00342	-0.00343	-0.00367	-0.00373	-0.00338	-0.00319
693.175	4.37236e-05	9.56111e-05	-3.19123e-05	2.88155e-05	-3.8275e-05	7.04343e-05	-0.000130988	-3.71089e-05	1.40211e-05	3.70794e-05	3.25123e-05	-5.8847e-05	-6.63725e-05	2.30547e-05	1.82512e-05	6.43123e-05	1.86584e-05	1.87129e-05	-9.58019e-06	-0.000232068	-1.22455e-05	-7.87143e-05	2.34378e-05	6.00327e-05	-8.61153e-05	7.03387e-05	0.000124723	8.01213e-05	-3.32463e-05	-4.94099e-05	3.46424e-05	2.33714e-05	8.54375e-05	8.15656e-05	-1.67502e-05	-4.2813e-05	-1.29019e-05	6.73108e-05	-0.00039085	-0.00128	-0.00205	-0.00255	-0.00293	-0.00328	-0.00356	-0.00365	-0.00377	-0.00348	-0.00331
694.367	-6.35086e-05	-4.46143e-05	7.76583e-05	0.000114056	-2.9697e-05	2.64289e-05	8.97082e-05	-3.62288e-05	5.08993e-05	-7.38684e-05	-2.35787e-05	3.30859e-05	-0.000104522	-6.58061e-06	-9.23771e-06	8.02026e-05	1.32268e-05	-0.00016262	6.05844e-05	-0.000118024	3.23292e-05	2.06452e-05	1.31171e-05	-1.20053e-05	-3.72073e-05	-2.08986e-05	-8.90304e-06	9.31824e-05	-5.72694e-05	-5.67563e-05	0.000129327	3.32727e-05	7.39877e-05	5.58846e-05	-8.01402e-05	-7.20174e-05	5.81072e-05	6.79659e-05	-0.000313714	-0.00137	-0.00195	-0.00256	-0.00286	-0.00332	-0.00362	-0.00366	-0.00386	-0.00352	-0.00344
695.56	0.000138784	3.1411e-05	0.000111899	0.000108933	7.98915e-05	-5.69339e-05	-4.07855e-05	-3.57947e-05	-4.78912e-05	-4.97365e-05	-6.78485e-05	9.33279e-06	-3.6968e-05	-8.77499e-05	-5.65433e-05	-1.18195e-05	1.53168e-05	-8.97753e-05	-1.11359e-05	-0.000132924	0.000161091	7.67633e-05	-2.78042e-05	-8.81416e-05	-4.41319e-05	0.000157537	8.5026e-05	2.03545e-05	-2.68446e-05	5.21026e-05	4.6839e-05	6.1771e-06	0.000115336	1.64264e-05	-8.77154e-05	-2.55888e-05	5.5897e-05	0.000164003	-0.000248792	-0.00129	-0.00214	-0.00251	-0.00298	-0.00354	-0.00366	-0.00368	-0.00401	-0.00359	-0.00354
696.752	0.000110226	-9.75998e-05	-8.84459e-06	3.97715e-05	-3.8893e-05	2.63623e-05	-4.5439e-06	-4.95822e-05	3.54575e-05	3.15575e-05	5.19887e-05	-4.60166e-05	1.80808e-05	-2.81654e-05	-3.97988e-05	9.83685e-05	7.34144e-06	1.35011e-05	0.000119334	5.01108e-05	7.06883e-05	2.89373e-05	-0.000137205	6.20299e-05	-0.000162055	5.26554e-05	-8.37314e-05	2.94474e-05	-1.03753e-05	-2.54548e-05	4.00979e-06	3.71882e-05	5.8591e-05	0.000103549	6.96099e-06	-7.6462e-05	0.00010004	0.000109299	-0.000283549	-0.00111	-0.0021	-0.00256	-0.00305	-0.00348	-0.00365	-0.00388	-0.00402	-0.00374	-0.00364
697.944	2.61151e-05	-8.91674e-05	1.24476e-05	1.90338e-05	6.65925e-05	9.06053e-05	-3.40375e-05	-3.82133e-05	7.18992e-05	-7.47189e-05	1.44313e-05	-7.50901e-05	-6.88625e-05	4.99254e-05	2.90394e-05	2.96326e-05	-1.5026e-05	-2.5915e-05	9.2176e-05	4.68405e-05	9.28566e-05	7.49686e-05	-2.67136e-06	-3.27972e-05	-3.69614e-05	0.000106436	8.75486e-06	1.40673e-06	7.12499e-05	0.000102116	5.99009e-05	0.00019345	9.69907e-05	0.000174755	4.02183e-05	6.45679e-07	6.88372e-05	0.000125615	-0.000236461	-0.00128	-0.00216	-0.00247	-0.00313	-0.00346	-0.00379	-0.00384	-0.00418	-0.00393	-0.00368
699.137	-5.69077e-05	2.53618e-06	4.91452e-05	-4.5789e-05	3.44362e-05	5.82913e-05	-5.67588e-05	3.05323e-05	0.000114952	4.78822e-05	-4.60083e-05	-8.71404e-05	3.84802e-06	-4.00674e-06	-4.5012e-05	1.16517e-06	2.30734e-05	6.5908e-05	8.59585e-05	-0.000144737	5.74549e-05	-5.86144e-05	0.00012172	-6.42717e-06	-9.3663e-06	3.49708e-05	5.55014e-05	4.35141e-05	-4.98988e-05	5.47783e-05	0.0001066	-2.26719e-06	8.3969e-05	9.32247e-05	-0.00017018	-0.000163171	9.39488e-05	0.000109622	-0.000219543	-0.00125	-0.00208	-0.00265	-0.00306	-0.00361	-0.0039	-0.00399	-0.00435	-0.00405	-0.00409
700.33	-0.000105865	-9.27032e-05	0.000164888	-0.000114895	-3.25491e-05	0.000109205	7.51135e-05	2.91235e-05	5.14753e-05	0.000109947	-8.944e-05	-5.11236e-05	-8.34798e-05	4.59611e-06	2.57069e-05	6.9973e-06	-1.5442e-05	6.10953e-05	0.000139932	-6.65169e-05	5.91488e-05	-7.74173e-05	7.5406e-05	-6.35545e-06	-0.000115597	-7.68589e-05	1.90973e-06	6.60603e-05	-4.08737e-05	-2.86163e-05	-5.97096e-06	1.33107e-05	2.97757e-05	2.87543e-05	-3.69744e-05	-1.40277e-05	3.50478e-05	8.44817e-05	-0.000231612	-0.00134	-0.00221	-0.00273	-0.0032	-0.00362	-0.00387	-0.00427	-0.00447	-0.00418	-0.0041
701.523	-6.7097e-05	-4.35917e-05	8.20841e-05	9.14245e-06	6.94876e-05	-1.93705e-05	3.80632e-05	1.61172e-05	8.58439e-05	5.11503e-05	-0.00010601	-1.70298e-05	-7.16983e-05	5.01756e-05	-7.72669e-05	7.72298e-05	0.000107635	-4.1618e-05	3.46528e-05	-1.64719e-05	6.29945e-05	4.23372e-05	5.05611e-05	7.33715e-05	4.27974e-05	7.55828e-05	4.98584e-05	-7.23401e-06	-4.76424e-05	-1.86403e-05	-0.000103454	-2.21984e-05	8.16615e-05	0.0001647	-7.3424e-05	2.30264e-06	-3.46128e-05	4.91091e-05	-0.000222652	-0.00137	-0.0022	-0.00271	-0.00316	-0.00362	-0.00396	-0.00428	-0.00456	-0.00432	-0.00436
702.716	9.8072e-05	-3.067e-06	6.9709e-05	2.31703e-05	-2.66759e-05	-4.35101e-05	1.78999e-05	-8.71339e-05	0.000145519	4.07864e-05	-0.00011503	-5.89025e-05	-0.00010611	7.11381e-05	-2.58649e-05	2.5768e-06	0.000208601	-4.17788e-05	8.03464e-05	-9.09723e-05	-6.8488e-05	1.58903e-05	0.000106209	-3.10257e-05	-8.45322e-05	8.25608e-05	-4.57877e-05	1.52588e-05	5.86795e-05	9.90557e-05	9.87261e-06	5.09408e-05	0.000117691	6.65185e-05	-6.9976e-05	2.64792e-05	0.00012842	0.000127962	-0.000220304	-0.00139	-0.00225	-0.00267	-0.00319	-0.00374	-0.00416	-0.00439	-0.00467	-0.00452	-0.00466
703.909	5.91331e-05	-5.0213e-05	7.41661e-05	-2.79689e-05	2.82706e-05	0.000192777	-9.02177e-05	-6.93205e-05	8.22119e-06	5.67082e-05	-4.78438e-05	-1.83169e-05	-0.000105806	4.86055e-05	-5.81956e-05	9.23326e-05	4.30619e-05	-4.72843e-05	-1.22743e-05	-6.33579e-05	8.42232e-05	8.37507e-06	-2.98266e-05	-7.20225e-06	-0.000159404	1.4651e-05	-4.72331e-06	-3.92052e-05	1.00079e-06	6.93203e-05	-2.30314e-06	-4.51065e-05	0.00018002	3.13082e-05	1.90472e-05	-3.26293e-05	5.29365e-05	5.08044e-05	-0.00029023	-0.00136	-0.0024	-0.00282	-0.0034	-0.00383	-0.00417	-0.00454	-0.00493	-0.0047	-0.00473
705.102	6.62934e-05	-2.84487e-05	0.000140303	-1.20447e-05	1.55831e-05	-2.7966e-06	-0.00011635	3.16877e-05	9.59455e-05	-2.27677e-06	-2.31907e-05	4.95236e-05	-3.28235e-05	-0.000105748	-7.56578e-05	3.72517e-05	-1.47883e-06	-7.68747e-05	-2.34391e-05	-8.68637e-05	6.73751e-05	1.04597e-05	-3.97715e-05	-8.2627e-05	-1.95049e-05	9.07446e-05	0.000130141	5.71552e-05	-6.49988e-05	1.69649e-05	3.25583e-05	5.80367e-06	8.89374e-05	9.79025e-05	-1.85223e-05	-5.19963e-05	0.000109084	8.86291e-05	-0.000321318	-0.00139	-0.00239	-0.00286	-0.0034	-0.00398	-0.00434	-0.00473	-0.00496	-0.00496	-0.00492
706.295	-4.59072e-06	2.781e-06	6.09087e-05	-6.76929e-05	1.82417e-06	9.33853e-05	-4.10461e-05	5.70197e-05	6.40093e-05	-6.01269e-06	-4.8663e-05	-2.21452e-06	1.18577e-05	-4.98822e-05	-7.16837e-05	6.84759e-05	8.50607e-05	4.59884e-05	0.000125094	-5.49191e-05	0.000117403	4.90135e-05	-1.056e-05	7.68268e-05	0.000122641	-4.24046e-05	-4.09575e-05	6.28474e-05	6.28074e-05	-2.6529e-06	-5.25952e-05	3.74811e-05	6.0726e-05	3.81405e-05	1.64477e-05	2.28351e-05	3.27278e-05	8.09611e-06	-0.000299623	-0.00142	-0.00255	-0.00302	-0.00348	-0.00416	-0.00444	-0.00485	-0.00519	-0.00502	-0.0052
707.489	9.5313e-06	1.63688e-05	9.46565e-05	-0.000115036	-1.11238e-07	-2.70535e-05	-6.33886e-05	-6.19307e-06	-8.79118e-06	2.15018e-05	-1.32542e-05	1.10005e-05	4.87692e-05	5.5166e-06	2.64829e-05	2.8246e-06	2.23368e-05	1.4249e-05	1.53501e-06	-0.00010837	-2.27521e-05	-9.04268e-06	-2.11801e-05	1.77941e-05	-5.57462e-05	-3.82296e-05	4.17764e-05	4.34997e-05	-3.5368e-05	-8.03848e-05	5.93362e-05	-9.6956e-05	1.42158e-05	9.97248e-05	-0.00011589	-4.41957e-05	-2.89248e-05	0.000125146	-0.000219747	-0.00132	-0.0026	-0.00319	-0.00368	-0.00423	-0.00467	-0.00508	-0.00545	-0.00532	-0.00553
708.683	8.67909e-05	-4.50416e-05	9.47023e-05	1.0703e-05	-1.68803e-05	-3.19138e-05	-2.27944e-05	-3.02461e-05	-5.13796e-05	-1.29213e-05	-6.81255e-06	-4.58299e-05	-2.7701e-05	0.00012016	-2.08356e-05	5.73178e-05	5.8026e-05	-2.84375e-05	2.03422e-05	-7.61739e-06	9.12067e-07	6.64559e-05	6.10922e-05	3.11125e-05	-1.25596e-05	6.88383e-05	-3.01469e-05	-5.12372e-05	-8.56362e-05	-3.44606e-05	7.53992e-05	6.6816e-05	2.13462e-05	0.000183055	-4.53189e-05	3.81605e-05	5.85436e-05	0.000122377	-0.00019407	-0.00148	-0.00268	-0.00315	-0.00378	-0.00426	-0.00477	-0.00516	-0.0056	-0.00549	-0.00561
709.876	-7.25014e-05	-9.43474e-05	2.3954e-05	1.45832e-05	4.08699e-05	5.86237e-05	2.84913e-05	-6.30092e-05	5.36427e-05	7.35719e-05	-5.61914e-05	-4.28302e-07	-4.46935e-05	7.09824e-05	-3.35478e-05	0.000152865	2.51271e-05	-9.52439e-05	6.38399e-05	-7.94808e-05	-3.53734e-05	2.40495e-05	-2.92575e-05	-6.75625e-05	-7.01074e-05	0.000131793	-3.47148e-05	-8.09257e-05	-0.000109042	-7.80215e-05	0.000110594	-2.43014e-05	-1.08004e-05	5.43308e-05	7.52617e-05	-4.78323e-05	-4.8927e-05	9.1859e-05	-0.000154717	-0.00149	-0.00275	-0.00325	-0.00393	-0.00452	-0.00488	-0.00534	-0.00579	-0.00565	-0.00588
711.07	3.09903e-05	1.15722e-05	5.94023e-05	-9.769e-05	1.74998e-05	4.77374e-05	3.08891e-05	-7.48949e-05	-3.45404e-05	3.17898e-05	-8.66791e-05	6.90773e-06	3.20637e-05	-1.45032e-05	3.94552e-05	0.000116417	7.31919e-05	3.95417e-05	7.03892e-05	-2.352e-05	-8.98888e-05	1.18972e-05	-8.61213e-05	-6.8159e-05	-2.37544e-05	1.9914e-05	-8.51013e-05	-6.50908e-05	-4.46084e-05	-8.43895e-05	2.97917e-05	2.90227e-05	6.39811e-05	9.30265e-05	-9.78144e-05	5.4443e-06	5.99739e-05	7.45286e-05	-0.000137312	-0.00151	-0.00298	-0.0035	-0.00411	-0.00471	-0.00515	-0.00555	-0.00611	-0.00591	-0.00632
712.264	5.61503e-05	-4.63127e-05	4.60715e-05	9.19169e-05	-4.84135e-05	-1.1997e-05	-7.22402e-05	2.21521e-05	-9.66098e-05	4.50098e-05	4.31168e-06	5.92219e-05	-6.29392e-05	-1.31124e-05	2.67907e-05	0.000141869	-2.34192e-05	2.27806e-06	0.000131774	-8.72067e-06	1.85911e-05	4.02649e-05	2.3055e-05	3.00858e-05	5.3011e-06	-1.89434e-05	-6.81291e-06	-6.81442e-05	-1.75365e-05	-4.66587e-05	7.6731e-05	2.00693e-05	0.000113995	6.58189e-05	-1.90535e-05	-5.07577e-06	2.40015e-05	8.05224e-05	-0.00017489	-0.0016	-0.00303	-0.00363	-0.00425	-0.00486	-0.00528	-0.00581	-0.00622	-0.00626	-0.00656
713.459	1.70604e-05	-5.0298e-05	6.28874e-05	-1.03772e-05	-5.28744e-05	7.81954e-05	2.36216e-05	0.00012142	-4.76155e-05	7.48512e-05	-3.08224e-05	-4.71866e-05	-8.57856e-05	4.52815e-06	-5.76043e-05	6.57811e-05	-2.00132e-05	3.68758e-05	-5.86209e-06	-0.000103714	-3.77108e-06	4.42458e-05	5.6154e-05	-5.25046e-05	-6.45322e-05	-7.06981e-05	-2.10304e-05	-4.87377e-05	-4.4522e-05	-6.76856e-05	1.74665e-07	-7.95616e-06	3.19607e-05	5.28778e-05	-0.000142671	-5.55945e-05	1.43124e-05	5.70255e-05	-0.0001802	-0.00165	-0.00323	-0.00387	-0.00451	-0.00518	-0.00557	-0.00613	-0.0066	-0.00659	-0.00686
714.653	5.58447e-05	-0.000108552	-2.53584e-06	6.88599e-05	2.23582e-05	0.000148934	-8.20883e-05	-6.83137e-05	4.20945e-05	-4.20382e-05	-1.7436e-05	-5.87143e-05	-4.16844e-05	3.93755e-06	7.93339e-05	6.81847e-05	3.10156e-05	5.06647e-05	-7.78955e-05	-8.01838e-05	-7.65002e-05	-2.25865e-05	4.74947e-05	-6.6674e-05	-6.279e-05	1.46521e-05	1.39443e-05	-5.73648e-06	1.07382e-05	3.93386e-05	9.86598e-05	-6.46754e-05	-3.10166e-05	2.62491e-05	-7.24432e-05	9.47348e-06	-3.10591e-05	3.26156e-05	-0.000228859	-0.00166	-0.00343	-0.00413	-0.00474	-0.00541	-0.00592	-0.00643	-0.00696	-0.00686	-0.00721
715.847	-5.61423e-05	-4.55646e-05	-4.91691e-06	1.24995e-05	-6.36128e-05	2.64896e-05	-3.32736e-05	1.61347e-05	0.000124818	2.45078e-05	-1.02158e-06	3.7989e-05	-6.06995e-05	-5.17512e-05	7.45434e-05	6.03244e-05	7.49589e-05	-4.99695e-05	3.3656e-05	-8.74206e-05	1.0932e-05	-5.59269e-06	-2.47507e-05	-0.000127103	3.00157e-05	-4.43738e-06	-3.49128e-05	-5.71752e-05	-8.12488e-05	3.69016e-05	5.57018e-05	-5.46466e-05	4.92654e-05	1.47132e-06	-0.000105232	3.43958e-05	-2.19206e-06	-2.27605e-06	-0.000287742	-0.00182	-0.00354	-0.0043	-0.00497	-0.00565	-0.00618	-0.00673	-0.00734	-0.00714	-0.00754
717.042	1.9579e-05	-1.92392e-05	6.92409e-07	8.16377e-06	6.57498e-05	4.1069e-05	-1.91863e-05	5.9473e-05	1.03206e-05	4.02185e-05	-9.16011e-05	-9.93087e-05	-2.01609e-05	-5.43879e-07	4.77394e-06	8.44032e-05	-2.65675e-06	-2.56828e-05	-2.49842e-05	4.25009e-05	9.52709e-05	-2.241e-05	2.52225e-05	2.01662e-05	2.36605e-05	4.99589e-06	2.44966e-05	5.7538e-05	5.17679e-05	3.97483e-06	6.43897e-06	8.89484e-06	5.38195e-05	2.74801e-05	-3.85731e-05	2.4007e-05	3.63e-05	-2.59701e-06	-0.00015543	-0.00183	-0.00379	-0.00455	-0.00522	-0.00592	-0.00654	-0.0071	-0.00764	-0.00767	-0.00794
718.237	-8.09859e-05	-5.31551e-05	-2.73198e-05	-4.62894e-05	0.000136613	0.000116445	-4.81135e-05	4.79135e-05	-6.99977e-05	6.51806e-05	1.54599e-05	6.70922e-05	-8.39834e-05	1.19822e-05	-5.08418e-05	6.80545e-05	8.9385e-06	-0.000116196	3.11411e-05	-0.000100079	7.59462e-05	7.84028e-05	5.69755e-05	9.7577e-06	-6.88248e-05	-3.18872e-05	-3.1556e-06	-1.4911e-05	-0.000102183	7.17201e-05	2.60214e-05	-8.15085e-05	7.93961e-05	-1.10691e-05	-6.22083e-05	-1.0806e-05	2.7188e-05	6.51344e-05	-0.000219123	-0.00192	-0.00396	-0.00487	-0.00549	-0.00622	-0.00677	-0.00743	-0.00799	-0.00803	-0.0084
719.432	-7.33538e-05	-6.4284e-05	0.000102421	-1.66233e-05	2.35723e-05	6.96514e-05	-9.38646e-06	1.81568e-05	1.29902e-05	6.98801e-05	-4.12287e-05	1.67526e-05	-0.00011145	2.00535e-06	8.96086e-07	0.000104027	8.56502e-05	-1.30391e-05	5.52319e-05	-2.57858e-05	7.90632e-06	1.04159e-05	6.69249e-05	-2.97557e-05	1.82544e-05	7.31214e-05	2.32257e-05	-4.41043e-05	-7.03997e-05	-6.65331e-05	7.62894e-05	3.6034e-05	8.84572e-05	0.000142974	-5.13764e-05	-5.561e-06	4.42672e-05	4.95232e-05	-0.000163629	-0.00202	-0.0042	-0.0052	-0.00586	-0.00655	-0.00713	-0.00776	-0.00842	-0.0084	-0.00887
720.627	-9.51756e-05	4.22541e-05	0.000107944	-7.22337e-06	-5.9269e-05	7.80984e-05	4.14525e-05	-2.46404e-05	-5.60694e-05	8.23361e-05	-3.8276e-05	7.36568e-05	-5.60062e-05	-8.82051e-05	-8.76737e-07	0.000142648	0.000110718	6.06057e-05	-6.72061e-06	-3.88918e-05	2.61219e-05	2.30942e-05	-7.79638e-06	-5.85399e-05	-9.70231e-05	3.96206e-05	9.12235e-05	1.54531e-05	3.71469e-05	-1.54342e-05	4.02088e-05	3.20725e-05	0.000165755	0.000120887	-2.75388e-05	-3.20531e-05	5.57759e-05	0.000168954	-0.000216366	-0.00215	-0.00457	-0.00562	-0.00628	-0.00695	-0.00757	-0.00827	-0.00886	-0.00882	-0.00935
721.822	-4.00903e-05	-9.72794e-05	2.87173e-05	3.22083e-05	-3.75307e-05	1.49541e-05	7.69982e-05	2.17366e-05	2.4468e-05	2.74178e-05	-6.70674e-05	6.75571e-05	-7.99539e-05	5.06821e-06	2.27964e-05	4.55743e-05	7.72534e-05	7.63142e-06	-5.7863e-05	-5.05285e-05	-1.40834e-05	1.97188e-05	1.61073e-05	6.62286e-05	-0.00010949	-9.55553e-06	4.2882e-05	2.3507e-05	-2.04435e-05	0.000116953	5.75633e-05	-1.79844e-05	0.000131535	8.41896e-05	-4.43836e-05	-3.46077e-05	5.05498e-05	8.29352e-05	-0.000175467	-0.00228	-0.00498	-0.00602	-0.00672	-0.00736	-0.00811	-0.00874	-0.00933	-0.00938	-0.00995
723.017	-3.83078e-05	-7.24566e-05	7.08549e-05	-1.74374e-05	1.32293e-05	8.16791e-06	3.90899e-05	-1.64713e-05	-4.52439e-05	1.92159e-05	-4.31288e-05	-2.38446e-05	2.96048e-06	3.83276e-05	6.50447e-05	4.23388e-05	4.21399e-05	1.27616e-05	2.16556e-05	-0.00011431	1.24186e-05	-7.86858e-06	4.56579e-05	6.15487e-05	-1.24244e-05	-8.17762e-06	0.000104918	-1.65084e-05	-6.15883e-05	4.69279e-05	2.25679e-05	7.26354e-06	9.04291e-05	1.89078e-05	-3.23789e-05	-9.49865e-05	2.38642e-05	1.61967e-05	-0.000197487	-0.00238	-0.00531	-0.00634	-0.00712	-0.00789	-0.00849	-0.00924	-0.00987	-0.00988	-0.01046
724.213	3.9448e-05	-9.51312e-05	7.30189e-05	-3.97796e-05	5.81408e-05	0.000125731	4.55266e-05	-5.76522e-05	3.68785e-05	0.000113898	-5.25053e-05	-9.52356e-06	-5.29935e-05	-8.47161e-05	-0.00010034	6.69171e-05	-1.07324e-05	2.15857e-05	-2.33493e-05	-9.50824e-05	-1.69511e-05	-1.65127e-05	4.92156e-05	-3.77204e-05	1.72651e-05	-3.57467e-05	3.74864e-05	-3.47779e-05	-3.14359e-05	1.54878e-05	2.102e-06	-3.48279e-05	6.34386e-05	6.95487e-05	-3.66544e-05	1.31712e-05	1.1736e-05	-2.31565e-05	-0.000290602	-0.00257	-0.00563	-0.00672	-0.00755	-0.00828	-0.00898	-0.00974	-0.01046	-0.0105	-0.01102
725.408	2.09383e-07	-3.22687e-05	3.27872e-05	6.22644e-05	5.98246e-05	5.55924e-05	1.47196e-07	4.48932e-05	-4.77656e-06	-5.011e-05	-0.000123908	-1.84109e-05	-2.31198e-05	1.30763e-05	-1.62003e-05	4.15577e-05	-1.3861e-05	-4.37612e-05	-3.40083e-05	8.15568e-07	-5.11297e-05	-5.78318e-05	1.83443e-05	-6.25588e-05	6.00155e-06	1.38185e-05	6.91491e-05	3.28965e-05	-8.59392e-05	-4.59002e-05	3.71366e-05	-9.94623e-05	8.93302e-05	3.51693e-05	-4.78369e-05	-3.72025e-05	-8.26051e-05	6.99063e-05	-0.000271628	-0.00264	-0.00593	-0.00714	-0.00797	-0.00875	-0.00939	-0.01018	-0.01088	-0.01087	-0.01159
726.604	4.84756e-05	-3.39102e-05	5.22316e-05	5.21577e-05	7.56596e-05	4.4526e-05	-1.99025e-05	7.29137e-05	-2.17586e-06	-7.96099e-06	-7.49041e-05	-3.13919e-05	-7.19258e-05	-5.80133e-05	-4.57795e-05	5.19255e-05	6.10968e-05	-2.64576e-06	7.18193e-05	3.88476e-05	3.40531e-05	3.29136e-05	7.34442e-05	2.56138e-05	7.19072e-05	3.50779e-05	4.97694e-05	4.16228e-06	4.4742e-05	1.9463e-05	9.74142e-06	-2.27174e-06	8.21099e-05	9.88875e-05	9.7789e-06	2.21425e-05	4.33265e-05	3.72804e-05	-0.000253323	-0.0027	-0.00623	-0.0076	-0.00843	-0.00914	-0.00986	-0.01072	-0.01143	-0.01152	-0.01217
727.8	2.25484e-06	-4.14325e-05	0.000102157	2.28692e-05	-0.000139417	1.27855e-05	1.06258e-06	5.08247e-05	5.7665e-06	2.10927e-05	2.41914e-05	3.70099e-05	-0.000113505	-2.83865e-05	4.27262e-05	4.76321e-05	2.84451e-05	6.05699e-05	-2.45093e-05	4.97819e-06	8.00538e-06	-1.15188e-05	5.51341e-05	-8.84237e-05	4.06692e-05	6.10093e-05	3.52275e-05	3.71792e-05	-9.15925e-05	-2.95535e-05	2.71345e-05	4.14117e-05	-4.91447e-06	4.76407e-05	-2.14239e-05	-6.52382e-05	4.63372e-05	2.59909e-05	-0.000278261	-0.00284	-0.00651	-0.00794	-0.00887	-0.00956	-0.0102	-0.01105	-0.01189	-0.01192	-0.01267
728.996	-2.49133e-05	-7.78905e-05	6.5474e-05	-2.45165e-05	4.13181e-05	-1.22927e-05	-4.91088e-05	4.25488e-05	6.44312e-05	2.37031e-05	-1.45516e-07	-2.07694e-05	8.74632e-06	-1.96849e-05	-1.68999e-05	1.03496e-05	4.16181e-05	-2.74438e-05	-5.11945e-05	-7.31677e-05	1.23478e-06	3.52203e-05	-2.62257e-05	-4.88726e-05	1.35542e-05	-3.22576e-05	-7.51293e-06	9.25541e-05	3.43792e-05	6.01161e-05	2.12226e-05	5.99796e-05	6.13853e-05	3.42048e-05	3.8561e-05	-1.45619e-05	7.86108e-05	4.43472e-05	-0.000189895	-0.00292	-0.00681	-0.00834	-0.00917	-0.01005	-0.01071	-0.0115	-0.0124	-0.01247	-0.01321
730.192	2.22157e-05	-7.51086e-05	6.83628e-05	6.94474e-06	2.71397e-05	2.94688e-05	8.21142e-05	1.46312e-05	-6.2943e-05	1.87426e-05	-3.87943e-06	-1.97916e-05	-1.38231e-05	-2.87942e-05	-6.52796e-05	-6.38309e-06	3.32209e-05	-2.7385e-05	3.82872e-05	-2.11687e-05	6.66348e-05	-5.75937e-05	-4.78227e-05	-1.20082e-05	7.27757e-05	3.46114e-05	4.43798e-05	9.12392e-06	-7.43948e-05	3.19829e-05	-5.93345e-06	4.97072e-06	9.1831e-05	-1.36929e-05	-2.66375e-05	3.85635e-05	7.58043e-05	8.91887e-05	-0.000154108	-0.0031	-0.00708	-0.00875	-0.00966	-0.01048	-0.01117	-0.01196	-0.01283	-0.01297	-0.01385
731.388	1.78425e-05	-8.38664e-06	7.33242e-05	-3.33116e-05	3.43579e-05	-8.56237e-06	3.65513e-05	2.99103e-05	-3.78942e-05	6.88687e-05	-7.14192e-05	5.91497e-06	-8.04287e-05	-3.83727e-06	-2.29298e-05	-7.43607e-05	2.38122e-05	-7.35917e-05	-2.28276e-06	-3.35232e-05	-1.57823e-05	-3.5793e-05	-8.7749e-05	-1.03269e-06	-3.33657e-06	4.11848e-05	1.99814e-05	-8.86703e-05	-9.91436e-05	-8.29503e-05	-2.24406e-05	-0.000156978	5.93003e-05	-5.83364e-05	4.32713e-05	3.70397e-05	3.33695e-05	5.20879e-05	-0.000209299	-0.00315	-0.00744	-0.00917	-0.01007	-0.0109	-0.01153	-0.01247	-0.01343	-0.01342	-0.01432
732.585	3.08043e-05	-3.95335e-05	5.9971e-05	-5.95082e-05	6.63598e-05	8.65379e-06	1.16989e-05	-3.51897e-05	1.4142e-05	1.0129e-05	-7.44802e-05	-5.42754e-06	-2.53462e-05	6.51739e-05	-2.74473e-05	-2.02295e-05	2.20806e-05	-5.63252e-05	-4.52224e-05	-2.39752e-05	3.55965e-06	-2.28468e-05	-2.31954e-05	-4.36439e-05	-4.26831e-05	5.32198e-05	1.36139e-05	-8.97979e-05	-1.23689e-05	1.45748e-05	3.7543e-05	-2.67698e-05	2.98156e-05	2.99056e-05	4.45565e-05	5.39028e-05	5.32766e-05	6.53765e-06	-0.000259371	-0.00331	-0.0078	-0.00955	-0.01048	-0.01121	-0.01206	-0.01293	-0.01384	-0.01393	-0.01486
733.781	2.86517e-05	-3.91434e-05	5.56401e-05	-3.6855e-05	7.0833e-05	6.51365e-05	3.87898e-05	1.18185e-05	-2.37841e-05	-8.20093e-06	-6.7767e-05	-4.47506e-05	-3.35118e-05	1.95064e-05	-3.63632e-05	-1.22955e-05	4.03992e-06	-2.32901e-06	5.01005e-05	1.42331e-05	-1.11686e-05	-1.10995e-05	1.43322e-05	2.30159e-05	-9.04924e-06	-1.67977e-05	4.99862e-05	-8.25239e-05	-7.86993e-05	3.01131e-05	2.80739e-05	-7.27156e-05	5.37861e-05	6.09491e-05	2.09143e-05	6.36928e-05	-1.88113e-05	3.5671e-05	-0.000380555	-0.00341	-0.00806	-0.00983	-0.0108	-0.01167	-0.01235	-0.01319	-0.01425	-0.01431	-0.01526
734.978	5.57066e-05	-8.71419e-05	7.04383e-05	-2.53924e-05	4.97707e-06	2.12479e-05	-3.3705e-05	1.6236e-05	1.64088e-05	9.912e-06	-1.01669e-05	3.00226e-05	-2.80576e-05	-1.07427e-05	-2.97428e-05	-2.65047e-05	6.27952e-05	6.1543e-05	2.9853e-05	-6.8913e-05	-2.88718e-05	2.79039e-06	-6.41817e-06	-1.61052e-05	-3.80704e-05	-1.5176e-05	1.11698e-05	3.75226e-05	-3.3748e-05	6.26457e-05	-2.2539e-05	-5.21178e-05	5.16312e-05	8.09767e-05	-3.33637e-05	-3.81553e-05	1.76385e-05	8.96239e-05	-0.000376281	-0.00348	-0.00825	-0.01015	-0.01108	-0.01197	-0.01261	-0.0135	-0.01456	-0.01461	-0.01561
736.175	-9.59123e-06	-1.13369e-05	6.18317e-05	1.38669e-05	3.86715e-05	-7.40543e-06	3.55374e-05	-8.26771e-06	-8.72129e-06	-1.06093e-05	-1.3696e-06	-1.79943e-05	-5.92391e-06	-4.51499e-05	-2.35379e-05	5.4433e-05	1.1046e-05	3.81332e-05	4.90147e-05	-5.08251e-05	-6.75741e-05	1.99118e-05	9.96018e-06	-7.50066e-05	-3.00284e-05	3.17086e-05	2.81677e-05	-1.43629e-06	-2.51485e-05	3.66543e-05	3.22079e-05	-2.47506e-05	9.80139e-05	7.5224e-05	8.89602e-06	0.000108753	3.52965e-06	5.39909e-05	-0.00032088	-0.00353	-0.00844	-0.01044	-0.0113	-0.01217	-0.01293	-0.01379	-0.01486	-0.01497	-0.01596
737.371	-2.65061e-05	1.22492e-05	2.8591e-05	3.53951e-05	-2.27971e-05	-3.20204e-05	2.38201e-05	3.54701e-05	5.73038e-07	2.82975e-05	-1.70551e-06	-6.81839e-05	-2.83536e-05	2.58698e-05	-1.06992e-05	4.9778e-05	2.05869e-06	-4.93764e-06	5.96886e-06	-7.36452e-05	-6.70587e-06	-3.36933e-05	-5.00105e-05	-2.30365e-05	3.61453e-05	2.9146e-05	3.30173e-05	-4.12607e-06	-3.76267e-05	-7.09696e-06	-1.44169e-05	-1.00043e-07	2.39353e-05	6.45394e-05	1.90467e-05	3.19032e-05	4.72204e-05	-1.43923e-05	-0.000294876	-0.00359	-0.00866	-0.01066	-0.01154	-0.01237	-0.01311	-0.014	-0.0151	-0.01529	-0.01627
738.569	1.637e-05	2.93366e-06	8.55587e-05	-2.31636e-05	-4.51274e-05	-2.1019e-05	-1.17338e-05	1.59875e-05	8.93391e-06	-1.54459e-05	-4.77295e-05	4.85974e-05	-3.50321e-05	-3.96727e-06	2.48374e-05	-3.37775e-06	3.82125e-07	-6.77313e-06	-5.24931e-05	-4.96375e-05	-2.34659e-05	-3.71456e-05	3.28749e-05	1.34565e-05	-8.43053e-05	-3.67164e-05	4.04556e-05	3.67043e-06	-8.92218e-05	6.06364e-05	-1.45846e-05	-2.03313e-05	2.1207e-05	8.10965e-05	-2.44193e-05	2.4187e-05	5.50088e-05	1.09301e-05	-0.000261094	-0.00359	-0.0087	-0.01084	-0.01167	-0.01248	-0.01313	-0.01407	-0.01515	-0.01541	-0.01643
739.766	6.27859e-05	-6.60711e-05	2.72884e-05	5.65226e-05	-5.12451e-05	6.88339e-06	1.6732e-05	-2.4734e-05	3.82335e-06	-5.42245e-05	-4.06677e-05	2.40503e-05	3.53851e-05	3.38267e-06	8.87753e-08	2.0197e-05	-3.02154e-05	1.4906e-05	-1.14532e-05	-2.45584e-05	7.87993e-06	-3.30539e-05	-1.31879e-05	-6.73433e-06	-2.89083e-05	-2.54361e-05	3.17573e-05	2.29195e-05	-3.40469e-05	4.71722e-05	2.97276e-06	6.19999e-06	0.000123809	2.45714e-05	9.18364e-05	5.74118e-05	6.89772e-05	-6.37314e-06	-0.000199832	-0.00353	-0.00874	-0.01088	-0.01178	-0.01254	-0.01327	-0.01419	-0.01528	-0.01549	-0.0166
[truncated: 66 more rows]
[truncated: 151 more columns]

## Sheet: Fig.2E
W/o		W/
Time(ps)	ΔA	Time(ps)	ΔA
-2.00667	0	-2.00667	-1.11022e-16
-1.892	0	-1.892	-1.11022e-16
-1.792	0	-1.792	-1.11022e-16
-1.69201	0	-1.69201	-1.11022e-16
-1.59201	0	-1.59201	-1.11022e-16
-1.49199	0	-1.49199	-1.11022e-16
-1.392	0	-1.392	-1.11022e-16
[truncated: 193 more rows]

## Sheet: Fig.2F
Wavelength (nm)	EQE(%)
[truncated: 73 more rows]

[truncated: 36 more sheets: Fig.2G, Fig.3B, Fig.3C, Fig.3D, Fig.3E, Fig.3F, Fig.3G, Fig.4A, Fig.4B, Fig.5B, Fig.5E, Fig.5F, Fig.5G, Fig.S2, Fig.S3, Fig.S4, Fig. S5, Fig. S6, Fig.S7, Fig.S8 …]
